# Supplementary material for: The Spatial Properties of L- and M-Cone Inputs to Electroretinograms That Reflect Different Types of Post-Receptoral Processing
Source: PLoS One. 2015 Mar 18;10(3):e0121218. doi: 10.1371/journal.pone.0121218 (PMC4364754; doi:10.1371/journal.pone.0121218)
Supplement: S4 File — (XLSX) [file pone.0121218.s008.xlsx]

## Sheet: L48_amp
Frequency	FF	70	60	50	40	30	20	10	AN10	AN20	AN30	AN40	AN50	AN60
0	3.821e-09	1.348e-08	6.178e-09	1.1575e-08	5.2575e-08	6.6e-10	2.57e-10	6.31e-10	1.96e-09	1.0399e-08	9.58e-10	8.633e-09	1.49e-09	5.481e-09	0
0.999506	0.00033103	0.0029292	0.00070806	0.00049588	0.0042079	0.00071072	0.0006983	0.00073696	0.0025304	0.001634	0.0023832	0.0015521	0.0027446	0.0010747	0
1.99901	0.0004148	0.00126	0.00019506	0.00019624	0.00099939	0.00083325	0.00018089	0.00020933	0.0012221	0.0012666	0.00014917	0.00077312	0.0024655	0.0005111	0
2.99852	0.00090606	0.00027707	9.1882e-05	0.00021503	0.00078806	0.00048256	0.00019651	0.00026532	0.00086497	0.00080306	0.00042118	0.00033871	0.00092091	0.00038104	0
3.99803	0.00015527	0.00092454	0.00021502	0.00028492	0.0010128	0.00025802	9.5608e-05	0.0001748	0.00083391	0.0012009	0.00063181	0.00056971	0.0005657	0.00010098	0
4.99753	8.7386e-05	0.00021808	0.00029141	0.0001953	0.00029751	0.00032281	0.00017661	0.00015964	0.00041763	0.00031513	0.00055988	0.00020046	0.00092794	8.8065e-05	0
5.99704	0.00016267	0.00016997	6.6101e-05	0.00019076	0.00011163	9.876e-05	6.0873e-05	0.00015415	0.0005842	0.00042199	0.0003341	0.00026141	0.00043997	6.5596e-05	0
6.99654	0.00036669	0.00042089	0.00016578	0.00012991	0.00041072	0.00022713	0.00013411	5.791e-05	0.0005393	0.00042844	0.0004083	0.00015265	0.00040768	3.823e-05	0
7.99605	0.00019269	9.383e-05	0.0002672	2.8059e-05	0.00015254	7.7024e-05	0.00015927	0.00010995	8.906e-05	0.00015615	0.00031412	0.00028571	0.00044549	0.00012902	0
8.99556	3.1597e-05	0.00017584	9.8826e-05	0.000156	8.5741e-05	0.00023359	0.00016516	7.5428e-05	6.4748e-05	0.00033405	0.00026905	8.7307e-05	0.00021135	8.9063e-05	0
9.99506	7.3663e-05	0.00013216	7.9496e-05	0.0002234	0.00010534	9.7396e-05	9.8313e-05	4.8158e-05	8.5062e-05	0.00010681	7.4959e-05	6.2506e-05	0.00022568	6.7399e-05	0
10.9946	0.00023462	0.00013552	3.6215e-05	5.4753e-05	8.6622e-05	0.00015041	0.00010091	5.5285e-05	7.7756e-05	2.6176e-05	0.00032934	6.6955e-05	0.00018776	2.3684e-05	0
11.9941	0.00012917	0.00016705	6.001e-05	5.5953e-05	1.4415e-05	6.3716e-05	7.1121e-05	2.291e-05	0.000149	0.00022425	5.0853e-05	0.00012204	0.00014065	2.8694e-05	0
12.9936	8.8278e-05	0.0001172	9.0873e-05	7.6756e-05	0.00024139	4.6952e-05	1.5572e-05	7.4898e-05	0.00010593	0.00011743	0.00018495	2.0302e-05	0.00024402	4.2753e-05	0
13.9931	5.0569e-05	0.0001445	1.8337e-05	0.00013686	9.6514e-05	2.9415e-05	7.1953e-05	2.1889e-05	7.0699e-05	0.00011403	5.8143e-05	2.1106e-05	0.00017061	2.623e-05	0
14.9926	9.2067e-05	0.00010352	2.4064e-05	4.723e-05	6.497e-05	9.7364e-05	4.906e-05	1.4988e-05	0.00010363	4.1058e-05	6.0058e-05	3.4491e-05	0.00013349	6.4508e-05	0
15.9921	1.0804e-05	9.7325e-05	2.8245e-05	7.815e-05	7.0164e-05	5.4558e-05	4.8137e-05	1.7955e-05	0.00015639	9.5811e-05	0.00021931	2.7132e-05	0.00012121	3.9508e-05	0
16.9916	9.0567e-05	0.00010842	5.2956e-05	5.3708e-05	6.6447e-05	1.0405e-05	3.0118e-05	4.7997e-05	6.2316e-05	4.0881e-05	2.8654e-05	3.786e-05	3.232e-05	1.9769e-05	0
17.9911	2.7143e-05	0.00010224	3.5232e-05	3.8236e-05	4.8571e-05	5.7483e-05	1.7444e-05	3.2385e-05	5.5426e-05	6.8822e-05	0.00020098	4.0299e-05	0.00012306	3.7998e-05	0
18.9906	6.5826e-05	8.8171e-05	3.755e-05	3.9667e-05	2.3857e-05	4.7664e-06	5.8305e-05	1.8516e-05	3.6961e-05	7.8573e-05	5.1826e-05	1.8643e-05	8.7807e-05	5.1778e-05	0
19.9901	5.459e-06	2.7319e-05	1.3111e-05	3.8579e-05	9.7448e-05	1.2802e-05	2.6023e-05	2.0776e-05	5.7485e-05	2.5364e-05	3.2031e-05	1.3365e-05	5.9754e-05	2.5326e-05	0
20.9896	3.4047e-05	3.5356e-05	6.8125e-06	2.1659e-05	6.978e-05	1.8806e-05	3.2195e-05	1.6219e-05	4.4542e-05	6.0471e-05	6.0385e-05	7.6539e-06	2.8084e-05	1.1479e-06	0
21.9891	2.2499e-05	4.8865e-05	5.0657e-05	2.2017e-05	2.8128e-05	1.6651e-05	3.7259e-05	2.9645e-06	6.8696e-05	5.4532e-05	5.123e-05	2.0036e-05	7.968e-06	1.2053e-05	0
22.9886	2.878e-05	1.7989e-05	2.5656e-05	3.2281e-05	3.2986e-05	4.5235e-05	9.6042e-06	1.5799e-05	6.6786e-05	3.3816e-05	9.1665e-05	5.0891e-05	8.5979e-05	3.9041e-05	0
23.9882	7.9951e-05	5.8645e-05	3.6848e-05	1.0257e-05	5.858e-05	4.4205e-05	4.5917e-05	2.4844e-05	2.8993e-05	4.7694e-05	8.2988e-05	3.3279e-05	4.9431e-05	1.9387e-05	0
24.9877	3.6787e-05	5.1903e-05	3.1179e-05	2.9304e-05	6.3755e-05	2.533e-05	1.4268e-05	4.1901e-05	5.5542e-05	2.8086e-05	2.5352e-05	2.8452e-06	5.7388e-05	3.9181e-05	0
25.9872	2.9638e-05	6.7753e-05	4.259e-05	1.3575e-05	6.4835e-05	4.9445e-05	4.2409e-05	2.0338e-05	3.9595e-05	3.9812e-05	2.4747e-05	1.3644e-05	4.5955e-05	2.0389e-05	0
26.9867	4.0179e-05	8.4879e-06	4.5271e-06	1.8099e-05	2.4921e-05	3.7379e-05	1.3764e-05	2.1463e-05	3.1967e-05	4.1884e-05	2.5838e-05	2.8568e-05	7.4059e-05	2.3773e-05	0
27.9862	4.2494e-05	5.2854e-05	3.5349e-05	1.1078e-05	8.6683e-05	3.1284e-05	2.4897e-05	1.248e-05	2.7195e-05	1.906e-05	4.0709e-05	5.6478e-05	3.7393e-05	3.611e-06	0
28.9857	2.4808e-05	3.0523e-05	5.1252e-05	3.6221e-05	4.4387e-05	3.1526e-05	1.8183e-05	1.2809e-05	2.4918e-05	7.3238e-05	3.6253e-05	2.3251e-05	3.8432e-05	3.8835e-05	0
29.9852	3.1938e-05	1.2493e-05	1.3793e-05	3.9513e-05	7.4382e-05	4.0943e-05	2.1214e-05	2.3733e-05	1.9321e-05	5.1252e-05	2.8702e-05	6.2333e-05	5.1475e-05	1.6277e-05	0
30.9847	3.2721e-05	2.8627e-05	2.9257e-05	2.928e-05	4.8313e-05	2.7118e-05	1.0282e-05	2.4486e-05	1.7164e-05	2.0467e-05	4.6929e-05	2.2635e-05	3.0136e-05	9.2495e-06	0
31.9842	1.2094e-05	3.1813e-05	1.6028e-05	4.2539e-05	2.3821e-05	2.123e-05	1.6822e-05	1.1982e-05	3.6275e-05	2.5843e-05	4.4193e-05	3.7525e-05	2.0744e-05	1.662e-05	0
32.9837	1.5002e-05	1.2649e-05	1.4986e-05	1.1395e-05	1.568e-05	3.6237e-05	1.9303e-05	1.2335e-05	1.6716e-05	5.0638e-05	1.8394e-05	1.8201e-05	3.6444e-05	8.6595e-06	0
33.9832	4.1163e-05	3.3347e-05	5.0422e-05	9.868e-05	2.4156e-05	1.2686e-05	1.4708e-05	2.7754e-05	1.7507e-05	1.9427e-05	1.5243e-05	4.5105e-05	2.1768e-05	3.8357e-05	0		signal-to-noise ratio
34.9827	7.8359e-05	3.7881e-05	8.9026e-06	4.5363e-05	0.00010293	5.2309e-05	1.8602e-05	6.7933e-06	3.0743e-05	2.3849e-05	2.8983e-05	3.0329e-05	2.8854e-05	1.8175e-05	0		FF	70	60	50	40	30	20	10	AN10	AN20	AN30	AN40	AN50	AN60
35.9822	1.3131e-05	3.8946e-05	1.4496e-05	1.6935e-05	5.9422e-05	2.4696e-05	2.8192e-05	2.0431e-05	1.5952e-05	2.8556e-05	4.999e-05	3.4212e-05	1.7753e-05	4.6863e-06	0		11.6694	7.77741	3.31127	3.59897	7.68336	3.22451	2.2612	3.57396	8.35705	5.39079	3.46562	5.51965	6.11709	5.78307
36.9817	2.5239e-05	3.4473e-05	2.586e-05	4.0432e-05	3.8701e-05	2.3694e-05	1.723e-05	5.7696e-06	3.6751e-05	8.9358e-06	2.6645e-05	4.0998e-05	2.9415e-05	4.9681e-05	0
37.9812	6.9352e-05	7.6094e-06	2.9e-05	2.0844e-05	3.1886e-05	4.4405e-06	1.7387e-05	8.2103e-06	1.04e-05	1.9492e-05	5.6742e-06	2.4705e-05	8.5722e-06	2.0388e-05	0		Black	first try	Jacob_Mellina_20130507_1102_L48
38.9807	1.8536e-05	2.5139e-05	3.4978e-05	3.0115e-05	2.2457e-05	5.2354e-05	2.4303e-05	3.438e-05	1.9116e-05	8.2085e-06	1.6724e-05	3.2052e-05	2.0078e-05	3.612e-05	0		Red	second try	Jacob_Mellina_20130522_1233_L48_2.csv
39.9802	6.4754e-05	4.1645e-05	1.948e-05	6.5216e-05	1.6761e-05	2.4963e-05	3.2367e-05	3.2153e-05	3.3478e-05	9.375e-06	3.9488e-05	5.4238e-05	2.8033e-05	2.2283e-05	0		Blue	fourth try	Jacob_Mellina_20130523_1213_L48_4.scv
40.9798	6.4304e-05	2.2893e-05	3.8728e-05	2.4161e-05	4.1882e-05	3.9516e-05	2.4106e-05	7.9326e-06	4.4939e-06	2.2978e-05	2.4051e-05	2.0614e-05	2.2305e-05	1.7411e-05	0		Purple	fifth try	Jacob_Mellina_20130523_1305_L48_5.csv
41.9793	2.3562e-05	6.1617e-05	4.3187e-05	4.7277e-05	4.2905e-05	2.707e-05	1.082e-05	2.0465e-05	5.6406e-06	7.4858e-05	4.0952e-05	5.8653e-06	3.0752e-05	2.1219e-05	0
42.9788	3.3138e-05	5.2121e-05	2.3961e-05	2.1996e-05	1.2001e-05	3.2236e-05	3.412e-05	1.9665e-05	1.4311e-05	6.5149e-05	4.6584e-05	5.3684e-06	2.3832e-05	1.6846e-05	0
43.9783	4.2045e-05	4.4747e-05	4.0216e-05	7.0647e-05	9.1377e-06	7.298e-06	3.719e-05	2.1521e-05	2.4127e-05	4.0861e-05	4.0585e-05	2.0131e-05	2.4834e-05	2.4231e-05	0
44.9778	4.7148e-05	1.9562e-05	6.8458e-06	5.8878e-05	2.0385e-05	1.6138e-05	2.1315e-05	2.2696e-05	9.3196e-06	3.9365e-05	5.4924e-05	2.4098e-05	1.1874e-05	5.1757e-05	0
45.9773	5.6003e-05	4.7987e-05	2.087e-05	2.1989e-05	3.8274e-05	1.2441e-05	4.9613e-05	2.1683e-05	1.8682e-05	2.5103e-05	3.7711e-05	2.7282e-05	1.9611e-05	2.2582e-05	0
46.9768	0.00010361	8.4951e-06	6.6391e-05	4.9428e-05	1.4442e-05	3.6102e-05	3.3388e-05	1.2165e-05	4.0639e-05	8.0176e-05	5.0661e-05	5.5556e-05	5.3847e-05	3.7211e-05	0
47.9763	0.0010707	0.0003286	0.00016487	0.00020494	0.00017311	9.0154e-05	5.3526e-05	4.1072e-05	0.00034762	0.00032897	0.00020758	0.0002451	0.00030316	0.00022929	0
48.9758	7.9896e-05	7.6006e-05	3.319e-05	6.446e-05	3.0619e-05	1.9816e-05	1.3955e-05	1.0819e-05	4.2553e-05	4.1873e-05	6.9133e-05	3.3254e-05	4.5272e-05	4.2086e-05	0
49.9753	0.00010694	0.00010298	1.8505e-05	8.3422e-05	5.2755e-05	3.8526e-05	2.8737e-05	2.4735e-05	0.00010632	3.3352e-05	7.221e-05	1.4474e-05	5.6539e-05	7.2033e-05	0
50.9748	5.8492e-05	5.8871e-05	3.8992e-05	2.7144e-05	1.3416e-05	1.312e-05	1.5345e-05	3.5835e-05	1.6562e-05	4.0787e-05	3.5939e-05	2.8191e-05	3.2175e-05	2.271e-05	0
51.9743	3.1816e-05	1.6181e-05	2.9027e-05	1.1722e-05	3.9029e-05	1.2868e-05	1.9941e-05	4.9912e-05	2.6034e-05	2.5888e-05	4.6272e-06	2.0557e-05	2.4498e-05	2.0444e-05	0
52.9738	4.4983e-05	2.0679e-05	1.0763e-05	3.5841e-05	1.7297e-05	2.3817e-05	2.5926e-05	2.2256e-05	3.8952e-05	5.4149e-05	3.3941e-05	9.2413e-06	2.0756e-05	4.5734e-05	0
53.9733	5.8889e-06	2.383e-05	4.2042e-05	4.4489e-05	2.0502e-05	3.8092e-05	1.3146e-05	1.1105e-05	1.1393e-05	1.8877e-05	1.4429e-05	1.818e-05	3.0927e-05	3.8675e-05	0
54.9728	4.714e-05	6.5592e-05	2.0875e-05	3.541e-05	2.4218e-05	3.4903e-05	8.4669e-06	3.5817e-05	2.6685e-05	2.8314e-05	3.7928e-05	4.9431e-05	1.8218e-05	4.1864e-05	0
55.9723	6.7581e-05	5.1888e-06	2.3404e-05	4.2497e-05	2.4459e-05	3.1411e-05	1.8521e-05	1.9735e-05	1.5878e-05	5.5364e-05	4.4659e-06	1.1336e-05	2.9982e-05	2.9804e-05	0
56.9719	2.09e-05	1.4317e-05	1.9046e-05	4.0125e-05	2.6544e-05	6.3741e-06	1.8204e-05	1.3076e-05	1.0774e-05	2.6242e-05	3.1606e-05	2.9179e-05	7.8263e-05	1.4578e-05	0
57.9714	4.8704e-05	2.1763e-05	2.2239e-05	1.798e-05	3.3313e-05	2.5236e-05	1.3156e-05	2.9005e-05	2.0519e-05	3.7037e-05	1.1085e-05	1.4373e-05	4.4127e-05	1.5957e-05	0
58.9709	3.0882e-05	4.9334e-05	1.907e-05	3.7314e-05	2.9085e-05	1.0553e-05	1.5401e-05	1.3185e-05	1.4239e-05	5.6101e-06	1.1403e-05	2.6758e-05	3.7887e-05	4.1606e-05	0
59.9704	3.0865e-05	2.7371e-05	2.3061e-05	1.2188e-05	3.7325e-05	3.3556e-06	2.5207e-05	2.9673e-06	3.1209e-05	2.0823e-05	1.0835e-05	2.9618e-05	1.7154e-05	1.7698e-05	0
60.9699	2.7974e-05	1.3906e-05	2.4926e-05	5.1276e-05	9.4048e-06	3.3183e-05	6.1245e-05	1.7218e-05	1.6527e-05	2.6499e-05	1.944e-05	1.1359e-05	5.5987e-05	1.1418e-05	0
61.9694	1.7169e-05	2.3878e-05	2.9742e-05	1.6626e-05	5.1847e-06	2.6666e-05	1.0684e-05	9.9626e-06	2.5441e-05	1.8616e-05	3.7098e-05	4.861e-05	2.5631e-05	3.1933e-05	0
62.9689	1.7944e-05	1.8976e-05	4.5059e-05	3.7709e-05	4.0699e-05	1.4983e-05	9.4892e-06	7.6786e-06	1.0326e-05	3.3223e-05	4.1238e-05	2.3877e-05	1.4628e-05	3.2212e-05	0
63.9684	3.2294e-05	3.2027e-05	4.737e-05	4.6526e-05	2.3893e-05	1.4921e-05	1.833e-05	4.8897e-05	2.9543e-06	7.2568e-05	2.5136e-05	1.0973e-05	3.1368e-05	2.1071e-05	0
64.9679	9.9588e-06	4.1258e-05	3.6456e-05	7.3477e-05	1.8804e-05	1.5592e-05	3.5453e-05	1.3225e-05	2.7044e-05	4.0724e-05	1.1864e-05	3.2986e-05	2.902e-05	1.7224e-05	0
65.9674	4.591e-05	6.0558e-05	3.1275e-05	7.1663e-05	7.7735e-06	1.8529e-05	1.2188e-05	1.6729e-05	3.5613e-05	1.458e-05	2.6361e-05	1.1351e-05	2.1639e-05	3.45e-05	0
66.9669	5.3629e-05	2.4467e-05	1.5662e-05	3.9106e-05	2.7718e-05	1.1608e-05	4.5388e-05	3.2184e-05	1.7506e-05	2.5418e-05	2.4688e-05	2.1815e-06	1.1869e-05	4.3111e-05	0
67.9664	3.4887e-05	9.4627e-06	2.7277e-05	2.8516e-05	7.8066e-06	3.3566e-05	2.9953e-05	6.3176e-06	1.7962e-05	1.9408e-05	1.1733e-05	1.5353e-05	1.7307e-05	2.5893e-05	0
68.9659	6.34e-05	1.16e-05	2.8827e-06	2.8069e-05	2.7377e-05	2.0463e-05	2.123e-06	4.3928e-06	2.3476e-05	1.4672e-05	1.0722e-05	4.16e-06	1.7436e-05	3.2973e-05	0
69.9654	4.4049e-05	1.9019e-05	3.3322e-05	2.136e-05	2.0076e-05	6.9957e-06	1.5502e-05	2.2825e-05	2.5726e-05	3.5515e-05	2.4955e-05	2.7036e-05	2.6918e-05	3.2196e-05	0
70.9649	1.6652e-05	1.5654e-05	1.6352e-05	1.5067e-05	4.1281e-05	2.1892e-05	1.8959e-05	4.9656e-05	1.2787e-05	3.4262e-05	2.163e-06	8.5213e-06	1.161e-05	1.0825e-05	0
71.9644	2.517e-05	1.118e-05	3.4339e-05	2.9287e-05	1.604e-05	2.6525e-05	2.2732e-05	3.9928e-05	2.241e-05	3.141e-05	3.2313e-05	1.6401e-05	5.8579e-06	2.2871e-05	0
72.964	1.1495e-05	1.1389e-05	2.3449e-05	3.5815e-05	2.595e-05	1.3026e-05	3.1325e-05	2.4624e-05	6.7436e-06	2.3865e-05	4.7867e-05	2.2605e-05	3.406e-05	2.1252e-05	0
73.9635	5.9017e-05	1.8299e-05	1.853e-05	3.5982e-05	2.9738e-05	3.3483e-05	2.328e-05	3.837e-05	9.6975e-06	4.0548e-05	4.6961e-06	3.7029e-05	7.3809e-06	3.9616e-05	0
74.963	6.7046e-05	1.5329e-05	6.1351e-06	2.2547e-05	2.5174e-05	5.6416e-06	4.6598e-06	3.0662e-05	2.3476e-05	6.0653e-05	3.4404e-05	2.9914e-05	3.1757e-05	1.9731e-05	0
75.9625	2.3466e-05	2.9091e-05	2.1258e-05	2.8588e-05	5.1185e-06	5.0135e-05	3.0669e-05	1.5715e-05	2.2029e-05	3.7739e-05	2.5011e-05	3.2567e-05	3.3399e-05	2.5692e-05	0
76.962	4.5498e-05	2.8864e-05	8.5877e-06	6.6453e-06	5.7834e-06	1.7927e-05	2.4833e-05	2.503e-05	2.341e-05	5.9805e-06	8.6526e-06	1.2266e-05	3.7208e-05	2.7669e-05	0
77.9615	7.6115e-05	1.3256e-05	3.7068e-05	3.375e-05	1.6196e-05	1.0236e-05	1.1189e-05	1.5294e-05	1.0675e-05	5.5463e-05	2.5942e-05	2.4787e-05	1.2119e-05	1.9383e-05	0
78.961	4.128e-06	1.3016e-05	2.5095e-05	7.9177e-05	2.3825e-05	1.7117e-05	4.7573e-06	7.486e-06	1.1281e-05	1.191e-05	3.543e-05	3.4465e-05	1.5943e-05	1.3664e-05	0
79.9605	1.6073e-05	1.1207e-05	2.4598e-05	2.3996e-05	1.7172e-05	5.7029e-06	1.5165e-05	1.8152e-05	2.7106e-05	1.6178e-05	1.4316e-05	2.6284e-05	1.6842e-05	2.7227e-05	0
80.96	1.9463e-05	2.0255e-05	1.2984e-05	1.9139e-05	2.7918e-05	1.734e-05	4.5226e-06	2.4251e-05	3.7241e-06	7.9086e-06	3.3703e-05	1.3698e-05	1.0817e-05	1.4339e-05	0
81.9595	5.1175e-06	5.4422e-05	1.0619e-05	4.9658e-05	1.8593e-05	2.2558e-06	2.6195e-05	9.8872e-06	1.3924e-05	1.6111e-05	2.8212e-05	5.1786e-05	3.066e-05	1.3933e-05	0
82.959	2.3262e-06	9.3832e-06	2.8316e-05	1.7258e-05	2.749e-05	2.2998e-05	2.5233e-05	1.9458e-05	2.5055e-05	3.0419e-05	1.3451e-05	9.6838e-06	3.0525e-05	3.26e-05	0
83.9585	3.1889e-05	2.0887e-05	1.025e-05	1.6546e-05	4.1676e-05	7.0234e-06	2.2562e-05	3.0118e-05	8.1097e-06	5.918e-06	1.8623e-05	1.7919e-05	1.933e-05	2.6632e-05	0
84.958	1.5317e-05	2.0108e-05	4.7391e-05	1.5916e-05	3.1607e-05	9.4766e-06	1.5673e-05	1.4364e-05	1.2183e-05	3.8117e-05	1.1949e-05	9.3083e-06	2.307e-05	8.221e-06	0
85.9575	3.1885e-05	1.7991e-05	1.1572e-05	4.1693e-05	2.5499e-05	5.3012e-06	3.0925e-06	4.9148e-06	2.5675e-05	1.7945e-05	8.9154e-06	2.4728e-05	2.3879e-05	1.9454e-05	0
86.957	1.366e-05	1.0035e-05	9.7692e-06	1.9775e-05	3.4518e-05	2.5323e-05	1.6862e-05	1.4659e-05	7.5268e-06	2.9703e-05	2.35e-05	8.2144e-06	1.1288e-05	2.1893e-05	0
87.9565	3.239e-05	1.8461e-05	3.3537e-05	3.7008e-05	1.1634e-05	3.8252e-05	5.8057e-06	2.4686e-05	1.4486e-05	5.1163e-05	2.6701e-05	7.6559e-06	5.0724e-06	2.5631e-05	0
88.9561	1.6528e-05	1.8606e-05	1.4978e-05	1.8134e-05	2.8383e-05	4.374e-06	2.636e-05	9.7079e-06	1.2394e-05	2.7387e-05	2.0134e-05	2.3187e-06	3.1357e-05	1.7241e-05	0
89.9556	7.3481e-06	8.1784e-06	1.3972e-05	1.2113e-05	6.4905e-05	8.3464e-06	1.425e-05	1.262e-06	7.3025e-06	2.6113e-05	1.7993e-05	2.3394e-05	2.0591e-05	7.8823e-06	0
90.9551	4.0203e-05	2.3424e-05	2.686e-05	1.3937e-05	2.2596e-05	9.6489e-06	1.1734e-05	1.1802e-05	2.2576e-05	1.232e-05	2.9335e-05	2.2959e-05	2.1532e-05	4.2914e-05	0
91.9546	5.7296e-05	1.4785e-05	3.7028e-05	2.3484e-05	3.0236e-05	3.8085e-05	1.395e-05	4.5586e-05	5.904e-06	4.6544e-05	1.3504e-05	1.26e-05	1.2899e-05	1.3572e-05	0
92.9541	3.8227e-05	2.6999e-05	1.2995e-05	3.0752e-05	3.5832e-05	6.384e-06	1.6983e-05	1.7487e-05	1.5506e-05	3.8267e-05	2.6144e-05	3.3147e-05	1.1762e-05	4.8006e-05	0
93.9536	2.1798e-05	2.4437e-05	1.4662e-05	3.0722e-05	2.9318e-05	6.8629e-06	6.6507e-06	1.304e-05	7.0764e-06	3.6262e-05	5.0777e-06	1.6223e-05	2.4202e-05	1.9047e-05	0
94.9531	4.3517e-05	1.8636e-05	2.7983e-05	4.4152e-05	3.3769e-05	4.4195e-05	2.6278e-05	1.5484e-05	1.295e-05	3.1269e-05	2.4085e-05	8.2667e-06	1.069e-05	1.7104e-05	0
95.9526	0.00013804	9.1428e-05	7.3606e-05	2.9119e-05	8.1913e-05	9.0666e-05	3.3126e-05	1.1124e-05	0.00011603	0.00010425	0.00010163	4.1172e-05	3.7648e-05	2.9865e-05	0
96.9521	3.6013e-05	9.275e-06	4.7041e-05	5.9452e-06	1.3647e-05	4.8241e-05	1.3749e-05	1.8156e-05	6.0098e-05	4.8716e-05	3.389e-05	4.7005e-05	2.1644e-05	3.3305e-05	0
97.9516	2.8649e-05	2.1594e-05	2.9879e-05	1.7931e-05	5.4904e-06	2.1553e-05	1.1664e-05	9.478e-06	3.5018e-05	5.2635e-05	2.9664e-05	2.5171e-05	9.5591e-06	1.3149e-05	0
98.9511	3.2182e-05	1.2906e-05	3.3269e-05	2.3592e-05	3.8567e-05	1.7459e-05	1.4646e-05	2.5122e-05	1.6936e-05	5.2406e-05	1.9486e-05	4.0773e-05	2.8734e-05	2.3672e-05	0
99.9506	7.0069e-05	2.634e-05	4.6321e-06	1.3634e-05	1.5399e-05	3.7396e-05	3.4276e-05	1.4028e-05	1.5565e-05	7.5615e-06	4.3582e-06	1.9754e-05	5.8033e-06	2.4317e-05	0
100.95	3.5025e-05	5.0139e-06	2.316e-05	2.3959e-05	2.5366e-05	1.9158e-05	6.925e-06	1.434e-05	1.3684e-05	1.9543e-05	2.5629e-05	1.541e-05	7.3078e-06	5.3232e-06	0
101.95	2.0143e-06	1.7197e-05	3.6396e-05	4.6133e-05	1.722e-05	1.472e-05	1.1299e-05	2.9476e-05	1.5515e-05	1.7745e-05	2.8564e-05	2.2989e-05	1.3062e-05	2.2022e-05	0
102.949	3.9082e-05	1.6773e-05	1.9305e-05	1.7645e-05	3.3675e-05	3.3167e-05	1.7774e-05	1.4104e-05	7.6386e-06	2.3408e-05	8.7571e-06	2.0231e-05	6.2769e-06	1.1732e-05	0
103.949	9.4501e-06	1.4814e-05	1.4375e-05	4.6567e-06	2.1655e-05	1.548e-05	2.367e-05	3.1539e-05	1.4462e-05	3.4405e-05	9.881e-06	1.8514e-05	2.0112e-05	2.2134e-05	0
104.948	2.0719e-05	2.2258e-05	3.4653e-06	3.6963e-05	2.2513e-05	2.5606e-05	2.0463e-05	1.4905e-05	1.1089e-05	1.062e-05	1.9013e-05	1.8425e-05	4.054e-05	6.1643e-06	0
105.948	9.6418e-06	1.2492e-05	2.7094e-05	1.7969e-05	2.4912e-05	2.0179e-05	1.9828e-05	1.5861e-05	2.1573e-05	2.3671e-05	2.3522e-05	1.4246e-05	1.7172e-05	2.5338e-05	0
106.947	3.3499e-05	1.2228e-05	8.5831e-06	7.289e-06	8.7497e-06	2.4125e-05	1.5084e-05	5.4603e-06	2.4728e-05	2.7511e-05	1.4304e-05	1.0242e-05	1.9609e-05	1.3548e-05	0
107.947	1.7823e-05	7.038e-06	1.0563e-05	5.204e-05	3.1078e-05	2.178e-05	1.3809e-05	8.2271e-06	1.4371e-05	2.8492e-05	1.2779e-05	4.2878e-06	2.0002e-05	1.8675e-05	0
108.946	1.4418e-05	1.7288e-05	1.3655e-05	1.6329e-05	1.7781e-05	1.32e-05	7.1592e-06	1.2981e-05	1.1006e-05	1.9931e-05	1.4817e-05	1.1768e-05	2.0092e-05	2.2626e-05	0
109.946	4.0696e-05	2.0853e-05	1.5241e-05	1.7677e-05	1.401e-05	1.9893e-05	5.7157e-06	1.3732e-05	2.7871e-05	1.2827e-05	8.9183e-06	1.4362e-05	3.1339e-05	1.9208e-05	0
110.945	3.0496e-05	3.6567e-06	1.7049e-05	2.6489e-05	1.4533e-05	1.7432e-05	3.8412e-06	1.8454e-05	6.0435e-06	2.5821e-05	9.1493e-06	1.4928e-05	1.8123e-05	1.4177e-05	0
111.945	4.5342e-05	7.2293e-06	1.7473e-05	1.1144e-05	1.0015e-05	5.0704e-06	2.1886e-05	1.8371e-05	2.2137e-05	1.0648e-05	1.6208e-05	2.2202e-06	3.3832e-06	4.4684e-06	0
112.944	3.1965e-05	2.8929e-05	2.1586e-05	2.2436e-05	5.8521e-06	2.6527e-05	7.8971e-06	6.2958e-06	9.1058e-06	3.267e-05	1.3721e-05	6.3342e-06	1.5065e-05	1.7175e-05	0
113.944	3.2689e-05	9.0474e-06	9.0004e-06	1.4766e-05	1.0224e-05	4.72e-06	1.8067e-05	8.2894e-06	7.7296e-06	3.2507e-05	5.6726e-06	1.7853e-06	1.0312e-05	2.0969e-05	0
114.943	1.8939e-05	4.4044e-06	7.373e-06	1.739e-05	1.1709e-05	1.1386e-05	4.3611e-06	1.5801e-05	5.6921e-06	1.6819e-05	5.9207e-06	1.4445e-05	2.3966e-05	2.4901e-05	0
115.943	9.145e-06	1.4578e-05	2.1951e-05	1.322e-05	1.5891e-05	1.5455e-05	4.2348e-06	2.63e-05	1.278e-05	2.0499e-05	1.6255e-05	1.0142e-05	1.4735e-05	2.4732e-05	0
116.942	2.7662e-05	2.2577e-05	1.7346e-05	3.3338e-05	1.4195e-05	2.048e-05	8.7245e-06	8.002e-06	5.9088e-06	2.7252e-05	4.0412e-06	2.1465e-05	1.9082e-05	1.5818e-05	0
117.942	5.4592e-06	3.9184e-06	5.6032e-06	1.8086e-05	1.6792e-05	5.2562e-06	4.738e-06	1.3839e-05	1.9597e-05	3.0647e-05	6.6792e-06	1.0642e-05	5.6211e-06	6.3244e-06	0
118.941	6.234e-06	3.9298e-06	2.173e-05	6.6338e-06	2.2542e-05	1.2523e-05	2.8706e-05	6.454e-06	9.7608e-06	2.9707e-05	1.4987e-05	2.4857e-05	8.2328e-06	1.7947e-05	0
119.941	1.5017e-05	7.4973e-06	8.1833e-06	2.3972e-05	1.3373e-05	9.7506e-06	1.8267e-05	1.6996e-05	1.2862e-05	1.9746e-05	9.6657e-06	1.1408e-05	2.264e-05	2.677e-05	0
120.94	2.3511e-06	1.029e-05	1.5785e-05	3.5835e-05	1.0577e-05	1.711e-05	9.1749e-06	8.381e-06	1.8878e-05	1.8473e-05	9.2608e-06	9.1467e-06	1.7808e-05	2.4149e-05	0
121.94	2.76e-05	9.2005e-06	1.9953e-05	4.6519e-05	2.5005e-06	1.1783e-05	2.725e-05	7.1663e-06	1.9446e-05	9.6807e-06	5.7356e-06	1.4406e-05	1.626e-05	1.1852e-05	0
122.939	2.5026e-05	4.2163e-06	1.406e-05	2.6304e-05	1.7045e-05	7.4152e-06	6.4821e-07	7.0413e-06	1.2113e-05	1.4766e-05	8.0108e-06	7.6282e-06	1.1955e-05	5.7088e-06	0
123.939	3.5789e-05	5.9624e-06	1.1978e-05	1.0447e-05	1.6803e-05	2.2498e-05	5.7822e-06	8.3467e-06	1.3131e-05	2.4112e-05	1.0889e-05	1.7101e-05	2.3641e-05	2.0793e-05	0
124.938	2.4476e-05	1.4715e-05	2.3851e-05	1.3077e-05	1.9298e-05	1.0278e-05	3.1325e-05	5.6387e-06	2.2565e-05	1.4613e-05	6.9177e-06	1.0806e-05	5.5648e-06	5.2275e-06	0
125.938	2.2703e-05	1.654e-05	1.7176e-05	6.2152e-06	1.3213e-05	3.2683e-06	7.962e-06	1.737e-05	4.1867e-06	1.4544e-05	6.0176e-06	7.3874e-06	1.4405e-06	2.5085e-05	0
126.937	3.0695e-05	8.6898e-06	2.0095e-05	8.375e-06	2.0004e-05	2.4114e-05	1.1462e-05	4.9453e-06	1.8969e-05	2.142e-05	9.0708e-06	2.5228e-06	1.9729e-05	1.9922e-05	0
127.937	3.1179e-05	8.5338e-06	2.4151e-05	2.7684e-05	3.0768e-05	6.8419e-06	1.1523e-05	1.1902e-05	2.4707e-06	2.3183e-05	1.0288e-05	1.6468e-05	2.0741e-05	8.9468e-06	0
128.936	1.8057e-05	6.9989e-06	3.5456e-06	1.1585e-05	9.4072e-06	6.2271e-06	1.9828e-06	6.2733e-06	8.9893e-06	9.5035e-06	1.3472e-05	1.0535e-05	9.0382e-06	1.6727e-05	0
129.936	3.5963e-05	9.5286e-06	5.279e-06	1.4362e-05	5.3932e-06	2.1209e-05	9.1115e-06	1.6728e-05	1.211e-05	1.3366e-05	1.0352e-05	1.0273e-05	8.6051e-06	2.4974e-06	0
130.935	1.5657e-05	2.2091e-05	1.4122e-05	3.0544e-05	1.8145e-05	1.5068e-05	2.2331e-05	1.7635e-05	1.2689e-05	1.9626e-05	1.1946e-05	1.4551e-05	1.7363e-05	1.5984e-05	0
131.935	1.1074e-05	3.7109e-06	8.716e-06	6.3462e-06	1.1007e-05	2.4763e-06	3.5258e-06	1.8036e-05	7.1866e-06	3.3943e-05	9.1653e-06	1.1204e-05	1.2135e-05	1.7331e-05	0
132.934	2.6498e-05	1.1778e-05	9.4908e-07	2.0353e-05	1.6032e-05	2.4963e-05	2.0835e-05	1.1601e-05	2.2109e-05	1.0019e-05	1.25e-05	9.3776e-06	1.2711e-05	6.5757e-06	0
133.934	4.3056e-06	6.8272e-06	1.4655e-05	2.2964e-05	1.5412e-05	1.0538e-05	1.3834e-05	1.3107e-05	1.0928e-06	1.5866e-05	1.8157e-05	1.4864e-05	1.6486e-05	2.453e-05	0
134.933	4.9574e-05	1.0335e-05	1.0325e-05	2.1267e-05	1.7321e-05	1.0132e-05	1.3599e-05	7.886e-06	1.7016e-05	1.1656e-05	2.3544e-06	1.0815e-05	1.9601e-05	3.9848e-06	0
135.933	8.0891e-06	1.8702e-05	7.205e-06	2.4534e-05	8.8202e-06	1.1457e-05	5.9565e-06	9.3888e-06	1.5072e-06	1.1322e-05	1.368e-05	1.4747e-05	1.4974e-05	9.2065e-06	0
136.932	2.562e-05	1.9073e-05	5.659e-06	1.3097e-05	1.3061e-05	1.9701e-05	1.1571e-05	1.2009e-05	6.1991e-06	1.3366e-05	1.6532e-06	3.4897e-06	6.7816e-06	1.1586e-05	0
137.932	1.2073e-05	1.5173e-05	1.4913e-05	6.7698e-06	1.9884e-05	7.5214e-06	8.3316e-06	1.1181e-05	3.3742e-06	2.3021e-05	5.2148e-06	1.331e-05	2.5614e-05	2.2191e-05	0
138.931	2.3406e-05	4.326e-06	1.1578e-05	1.4237e-05	8.8384e-06	1.4752e-05	7.1716e-06	1.0444e-05	1.4041e-05	1.5018e-05	1.3152e-05	5.8111e-06	2.0662e-05	8.1828e-06	0
139.931	3.693e-05	8.3378e-06	1.5177e-05	5.6409e-06	1.1569e-05	7.2556e-06	1.3198e-05	9.6135e-06	1.1741e-05	3.893e-05	1.0227e-05	7.7016e-06	7.4307e-06	2.2398e-05	0
140.93	4.6143e-06	1.5385e-05	6.4603e-06	7.2673e-06	6.1675e-06	5.2618e-06	1.2297e-05	9.7441e-06	1.0592e-05	1.754e-05	1.131e-05	1.9142e-05	4.0163e-06	2.6901e-05	0
141.93	3.1622e-05	1.6507e-05	1.2786e-05	2.0561e-05	8.9064e-06	8.7905e-06	1.6449e-05	9.3563e-06	1.9085e-05	1.937e-05	5.9473e-06	1.0141e-05	1.5511e-05	8.9013e-06	0
142.929	3.7515e-05	2.0821e-05	1.4422e-05	1.2847e-05	5.9898e-06	1.9757e-05	1.5808e-05	2.2979e-05	2.2846e-05	3.7655e-05	3.557e-05	9.3394e-06	1.4535e-05	5.5366e-06	0
143.929	0.0001126	6.3633e-05	3.3119e-05	3.8514e-05	4.7053e-05	2.2203e-05	1.2819e-05	9.2234e-06	8.3431e-05	6.5936e-05	6.7429e-05	5.2293e-05	3.5283e-05	9.1025e-06	0
144.928	3.8937e-05	4.6644e-05	2.6042e-05	2.3668e-05	2.0927e-05	6.5434e-07	5.8622e-06	8.9856e-06	4.8842e-05	3.4347e-05	4.3736e-05	1.9741e-05	1.1558e-05	2.8485e-05	0
145.928	2.0174e-05	1.8433e-05	8.6597e-06	1.8941e-05	1.1518e-05	5.6225e-06	7.3079e-06	6.4675e-06	3.1048e-05	2.728e-05	3.8671e-06	3.9062e-06	5.895e-06	3.1188e-05	0
146.927	5.7619e-06	1.0161e-05	2.0675e-05	9.0957e-06	1.1969e-05	1.9223e-05	1.5999e-05	8.2521e-06	5.4538e-06	3.8878e-06	7.062e-06	8.635e-06	1.482e-05	1.8041e-05	0
147.927	2.0897e-05	1.0226e-05	1.598e-05	4.9341e-06	1.5812e-05	8.6934e-06	1.2491e-05	1.1199e-05	1.5914e-05	1.8391e-05	6.4165e-06	6.773e-06	2.1827e-05	1.0527e-05	0
148.926	2.7368e-05	1.3892e-05	1.8912e-05	9.0733e-06	2.523e-06	1.5926e-05	5.1659e-06	6.5586e-06	1.3911e-05	9.8134e-06	1.1561e-05	1.0268e-05	1.0889e-05	8.1354e-07	0
149.926	1.7261e-05	7.5595e-06	1.2458e-05	2.1511e-05	2.6308e-06	1.477e-05	1.2664e-06	1.4461e-05	1.1843e-05	1.0558e-05	2.531e-05	1.1179e-05	1.4484e-05	8.2095e-06	0
150.925	2.1262e-05	1.6219e-05	1.4554e-05	1.6009e-05	1.489e-05	4.9254e-07	1.332e-05	2.013e-06	5.0775e-06	7.2003e-06	1.6359e-06	4.3418e-06	5.7622e-06	2.3684e-05	0
151.925	1.6594e-05	1.5818e-05	8.9508e-06	1.2753e-05	7.8471e-06	2.9866e-06	1.1484e-05	7.9767e-06	1.2728e-05	1.3815e-05	1.2216e-05	1.16e-05	8.6603e-06	8.4342e-06	0
152.924	7.8132e-06	5.2553e-06	1.3872e-05	1.0374e-05	1.635e-05	1.2226e-05	7.2683e-06	9.9015e-06	1.0165e-05	3.0454e-05	3.7761e-06	1.1055e-05	1.5117e-06	6.5203e-06	0
153.924	1.3214e-05	1.0424e-05	8.9276e-06	1.9673e-05	1.2257e-05	4.3861e-06	1.7636e-05	1.6627e-05	1.2231e-05	6.3734e-06	1.2091e-05	6.1381e-06	1.6927e-05	8.7064e-06	0
154.923	6.9254e-07	2.561e-06	5.0835e-06	8.9651e-06	1.8074e-05	4.6974e-06	1.281e-05	2.8099e-06	8.9332e-06	1.0388e-05	9.0903e-06	1.0672e-05	1.2572e-05	8.622e-06	0
155.923	1.5062e-05	5.9631e-06	9.3653e-06	1.0335e-05	1.0451e-05	6.497e-06	1.0576e-05	1.0235e-05	8.4509e-06	1.1411e-05	4.2353e-06	3.6843e-06	1.2855e-05	1.1624e-05	0
156.922	6.2333e-06	1.4504e-05	6.5118e-06	1.8109e-05	7.0144e-06	6.8062e-06	2.0986e-05	1.278e-05	1.4378e-06	1.5467e-05	7.7241e-06	6.3655e-06	1.1114e-06	8.5183e-06	0
157.922	3.21e-05	5.9908e-06	4.9631e-06	1.6722e-05	7.4565e-06	1.7393e-05	1.282e-06	9.1634e-06	1.036e-05	1.1479e-05	8.1906e-06	4.9195e-06	6.3521e-06	8.9441e-06	0
158.921	1.6427e-05	5.0232e-06	4.4003e-06	1.4635e-05	7.4056e-07	9.3639e-06	8.1394e-06	3.1956e-06	9.8028e-06	1.8574e-05	2.7746e-06	1.8098e-05	9.7928e-06	7.4165e-06	0
159.921	1.1188e-05	1.5852e-05	1.8054e-05	1.3253e-05	7.009e-06	5.2364e-06	1.1932e-05	1.2277e-06	9.2553e-06	1.0033e-05	1.0815e-05	2.2887e-06	8.6766e-06	3.0879e-06	0
160.921	9.678e-06	1.4366e-05	6.329e-06	1.5809e-05	1.4649e-05	9.6095e-06	2.5879e-06	2.5332e-06	4.8591e-06	1.593e-05	1.1428e-06	2.0647e-05	7.7503e-06	1.4997e-05	0
161.92	2.6718e-05	5.5948e-06	2.0127e-05	2.9515e-05	9.1719e-06	1.1295e-05	8.5039e-06	8.3341e-06	7.1645e-06	1.8313e-05	1.6299e-05	2.3257e-06	7.1837e-06	1.2746e-05	0
162.92	2.7456e-05	1.1791e-05	1.3255e-05	2.0633e-05	4.0106e-06	5.6778e-06	8.1083e-06	2.0127e-05	1.1116e-05	3.6309e-06	6.3917e-06	2.4577e-06	1.8759e-05	8.1965e-06	0
163.919	1.889e-05	5.6612e-06	1.3537e-05	7.1064e-06	1.1197e-05	6.4235e-06	3.4418e-06	3.8552e-06	5.9226e-06	2.2425e-05	7.4498e-06	3.5956e-06	1.8896e-05	6.8807e-06	0
164.919	1.7622e-05	2.058e-05	4.7006e-06	1.1201e-05	1.1341e-05	3.8933e-06	2.2314e-06	1.78e-05	2.8684e-06	7.7299e-06	9.8592e-06	5.786e-06	1.5507e-06	5.7304e-06	0
165.918	2.9905e-05	7.7099e-06	7.4726e-06	3.5939e-06	5.8436e-06	7.9782e-06	1.2571e-05	9.5231e-06	3.4349e-06	1.9927e-05	4.1429e-06	1.1703e-05	4.757e-06	2.4622e-05	0
166.918	1.8206e-05	1.1061e-05	1.3694e-05	1.3715e-05	1.6574e-05	1.0888e-05	1.4614e-05	5.2726e-06	1.5624e-05	2.4712e-05	1.7471e-05	7.6781e-07	9.9635e-06	1.0079e-05	0
167.917	1.8842e-05	1.7909e-05	6.242e-06	1.5716e-05	2.0899e-05	8.0929e-06	3.2522e-06	1.0583e-05	1.1098e-05	1.2743e-06	1.603e-05	1.1416e-05	3.2099e-06	1.9118e-05	0
168.917	1.9753e-05	2.7161e-06	4.753e-06	7.5204e-06	6.5866e-06	6.3982e-06	7.939e-06	1.1487e-05	6.25e-06	6.1965e-06	1.633e-05	7.1797e-06	1.5332e-05	2.6563e-05	0
169.916	1.6182e-05	1.7176e-06	6.9115e-06	7.2179e-06	1.3714e-05	2.2459e-06	1.0899e-05	9.1484e-06	7.5489e-06	6.5884e-06	4.6366e-06	1.4781e-06	2.2287e-05	1.0615e-05	0
170.916	7.2277e-06	8.497e-06	3.1054e-06	2.2154e-05	7.7074e-06	9.0395e-06	6.8888e-06	1.3347e-05	9.6053e-06	8.1319e-06	4.9455e-06	3.5981e-06	4.2626e-06	1.2848e-05	0
171.915	1.9433e-05	8.0044e-06	5.1276e-06	1.1323e-05	1.8233e-05	1.6534e-05	6.2482e-06	1.5061e-05	1.1519e-05	4.3663e-06	1.1638e-05	8.621e-06	7.5683e-06	4.176e-06	0
172.915	3.8338e-06	1.306e-05	1.2718e-05	1.1464e-05	1.212e-05	5.1806e-06	1.058e-05	5.3457e-06	6.3216e-06	5.9516e-06	7.0466e-06	9.8944e-06	1.6559e-05	8.3253e-06	0
173.914	5.481e-06	9.2621e-06	6.9117e-06	1.4743e-05	2.4299e-05	1.1188e-05	3.5915e-06	4.8915e-06	4.5866e-06	4.0766e-06	1.3096e-05	7.9643e-06	1.0101e-05	3.9311e-06	0
174.914	1.6486e-05	7.1764e-06	7.8294e-06	2.1383e-05	2.0512e-06	7.9803e-06	1.0708e-05	1.4379e-05	4.9475e-06	1.7984e-05	3.852e-06	9.8195e-06	5.7999e-06	1.8897e-05	0
175.913	2.0404e-05	8.418e-06	1.1563e-05	1.7707e-05	5.3301e-06	3.2425e-06	7.785e-06	3.7345e-06	8.8421e-06	7.8464e-06	6.024e-06	1.3303e-05	9.0991e-06	9.3633e-06	0
176.913	2.4195e-05	8.312e-06	1.0848e-05	1.3469e-05	1.4393e-05	1.0619e-05	8.4337e-06	1.0938e-05	1.0288e-05	1.8484e-05	1.3567e-05	4.3982e-06	1.0129e-05	1.8095e-05	0
177.912	8.5765e-06	5.6684e-06	9.0915e-06	1.2328e-05	5.615e-06	5.0257e-06	2.2161e-06	6.793e-06	7.2881e-06	4.4502e-06	3.3233e-06	2.937e-06	1.5126e-05	1.8919e-05	0
178.912	3.9847e-05	1.9172e-06	9.2905e-06	4.7917e-06	7.4641e-06	9.6239e-06	4.9189e-06	1.0255e-05	1.4469e-05	5.0069e-06	1.5071e-05	9.2009e-06	1.7898e-05	1.0785e-05	0
179.911	9.2806e-06	7.2196e-06	1.481e-05	5.8093e-06	5.5677e-06	6.0919e-06	1.5116e-06	4.8672e-06	7.5486e-06	1.1789e-05	7.9054e-06	6.3318e-06	1.5084e-05	1.8441e-05	0
180.911	7.1776e-06	7.3736e-06	1.5611e-05	9.8583e-06	6.3042e-06	4.9511e-06	7.1733e-06	1.5459e-06	2.4689e-06	7.5628e-06	2.1319e-06	3.3637e-06	8.9718e-06	7.6453e-06	0
181.91	1.5922e-05	9.8275e-06	8.4241e-06	1.1428e-05	1.105e-05	9.1338e-06	2.6389e-06	2.3368e-05	1.2647e-06	1.3244e-05	6.2177e-06	4.0526e-06	1.1667e-05	1.4207e-05	0
182.91	6.8674e-06	5.2497e-06	1.6519e-05	1.1601e-05	6.4531e-06	5.1956e-06	1.3448e-05	1.087e-05	3.8982e-06	1.2736e-05	6.0137e-06	2.5305e-06	8.6249e-06	7.2056e-06	0
183.909	1.6068e-05	1.168e-05	1.0004e-05	2.435e-06	6.8603e-06	1.0359e-05	3.3641e-06	1.0636e-05	7.3868e-06	6.8144e-06	9.2452e-06	4.7842e-06	7.8051e-07	2.3143e-05	0
184.909	1.1152e-05	3.7864e-06	5.6712e-06	9.4682e-06	6.7454e-06	9.0104e-06	2.4721e-06	2.6826e-06	3.5352e-06	1.1699e-05	3.8889e-06	3.8516e-06	6.4845e-06	6.2289e-06	0
185.908	1.5564e-05	6.5245e-06	1.464e-05	1.8345e-05	1.0788e-05	4.3616e-06	5.1014e-06	3.977e-06	1.3647e-05	3.6355e-06	1.1573e-05	1.1241e-05	6.804e-06	5.0154e-06	0
186.908	4.8485e-06	1.0397e-05	3.3327e-06	9.9399e-06	2.1957e-05	6.2406e-06	7.2311e-06	3.6528e-06	1.7512e-05	9.7426e-06	3.8674e-06	1.0702e-05	8.7986e-06	1.5754e-05	0
187.907	1.354e-06	1.143e-05	4.0569e-06	1.0281e-05	1.1805e-05	5.6172e-06	4.0745e-06	2.2088e-06	1.2242e-05	1.1229e-05	8.1391e-06	6.9814e-06	1.7491e-05	3.2719e-06	0
188.907	1.0459e-05	1.2621e-05	1.6618e-06	9.3764e-06	2.2236e-05	8.8493e-06	2.5554e-06	7.6216e-06	7.5945e-06	1.59e-05	2.9047e-06	1.2961e-05	9.8242e-06	1.3363e-05	0
189.906	5.6289e-06	6.613e-06	7.3428e-06	1.0585e-05	7.0236e-06	2.4371e-06	9.2099e-06	1.9006e-05	5.4451e-06	5.4964e-06	1.658e-05	1.4543e-05	2.394e-06	1.1782e-05	0
190.906	1.3118e-05	6.1761e-06	1.6194e-05	1.6018e-05	9.6631e-06	1.2391e-05	1.4634e-05	3.1003e-07	1.4322e-05	1.1195e-05	1.172e-05	9.7882e-06	3.9704e-06	3.79e-06	0
191.905	4.3312e-06	3.0974e-05	2.6266e-05	1.8674e-05	2.2529e-05	8.021e-06	5.7938e-07	3.6781e-06	3.9108e-05	3.6968e-05	1.0016e-05	6.4327e-06	6.1619e-06	1.5746e-05	0
192.905	1.4564e-05	2.7919e-05	1.8015e-05	1.5844e-05	2.7439e-05	2.0997e-06	1.3297e-06	4.4231e-06	3.0826e-05	1.7762e-05	1.8241e-05	1.6293e-05	1.8545e-05	2.3486e-06	0
193.904	1.4527e-05	2.1205e-05	9.2783e-06	9.5391e-06	1.413e-05	8.6039e-06	9.058e-06	3.649e-06	3.0405e-06	1.6684e-05	1.1396e-05	4.6204e-06	7.0598e-06	7.654e-06	0
194.904	2.1852e-06	5.4993e-06	4.3597e-06	1.5334e-05	1.262e-05	4.296e-06	6.4876e-06	4.4663e-06	9.6472e-07	5.3185e-06	6.2706e-06	7.0568e-06	4.4162e-06	1.3462e-05	0
195.903	6.3647e-06	5.9406e-06	7.1752e-06	8.9334e-06	8.5881e-06	6.2829e-06	5.1089e-06	3.7813e-06	8.9599e-06	1.2236e-05	1.2935e-05	1.3961e-05	4.5401e-06	9.6674e-06	0
196.903	8.7379e-06	1.0536e-05	9.1309e-06	4.6621e-06	7.2914e-06	1.0818e-06	6.9466e-06	3.8745e-06	5.7917e-06	1.262e-06	1.3849e-05	6.798e-06	6.7687e-06	8.9413e-06	0
197.902	6.7511e-06	7.18e-06	9.6258e-06	1.3167e-05	7.8321e-06	5.5265e-06	4.1042e-06	7.124e-06	9.5028e-06	1.169e-05	8.1997e-06	1.0145e-05	8.1166e-06	7.3612e-06	0
198.902	1.5274e-05	4.4503e-06	2.0172e-05	1.2364e-05	3.6895e-06	6.3304e-06	4.3391e-06	5.0249e-06	7.8806e-06	5.3099e-06	4.249e-06	7.5034e-06	3.0783e-06	2.6773e-06	0
199.901	1.5167e-05	1.0585e-05	1.8589e-06	2.5466e-06	7.651e-06	6.9776e-06	2.1214e-06	7.2001e-06	5.271e-06	1.2145e-05	2.7567e-06	3.977e-06	2.0076e-06	6.9221e-06	0
200.901	1.122e-05	1.3282e-05	1.208e-05	6.2227e-06	3.6798e-06	9.5674e-06	9.9459e-06	1.3742e-05	5.4397e-06	1.5312e-05	8.1006e-06	7.1627e-07	5.7156e-06	4.5148e-06	0
201.9	1.3117e-05	3.6382e-06	5.475e-06	1.0575e-05	1.0675e-05	4.1925e-06	4.0545e-06	3.951e-06	5.0971e-06	7.2657e-06	5.4674e-06	9.2736e-06	1.2908e-05	2.8698e-06	0
202.9	2.011e-05	8.5099e-06	1.2106e-05	1.405e-05	1.0278e-05	7.7843e-06	4.4398e-06	6.605e-06	5.9457e-06	3.5347e-06	8.9091e-06	2.2047e-06	7.9961e-06	1.2446e-05	0
203.899	1.2751e-05	5.9589e-06	1.0008e-05	6.0452e-06	8.8762e-06	8.5034e-06	3.2886e-06	6.6689e-06	3.1518e-06	7.4383e-06	6.7059e-06	3.2924e-06	3.3929e-06	1.7653e-05	0
204.899	1.018e-05	1.1726e-05	8.1928e-06	1.1427e-05	1.4771e-05	2.2092e-06	2.2686e-06	8.2742e-06	2.3723e-06	6.6639e-06	7.4146e-06	7.2529e-06	6.766e-06	3.8952e-06	0
205.898	1.5925e-05	8.9585e-06	5.6078e-06	1.0307e-05	1.0104e-05	5.9075e-06	5.747e-06	4.9947e-06	4.7118e-06	1.2221e-05	3.7861e-06	9.7205e-06	1.1279e-06	3.8834e-06	0
206.898	8.3881e-06	1.4748e-05	8.4212e-06	1.1665e-05	7.9407e-06	9.9833e-06	7.5524e-06	2.3011e-06	5.1288e-06	4.0088e-06	2.7141e-06	8.5832e-06	1.6648e-05	3.4554e-06	0
207.897	1.3704e-05	9.7855e-06	1.0303e-05	1.5735e-05	3.7798e-06	6.6246e-06	1.3177e-05	8.1716e-06	9.5835e-06	3.4403e-06	4.8315e-06	8.6935e-06	7.3838e-06	1.153e-05	0
208.897	7.6705e-06	7.9904e-06	9.6075e-06	2.0571e-05	1.1841e-05	1.098e-05	1.6239e-06	6.8759e-06	2.1916e-06	5.8956e-06	1.9503e-06	3.3772e-06	4.6426e-06	5.23e-06	0
209.896	1.4674e-05	2.9485e-06	8.6968e-06	6.859e-06	1.0471e-05	2.5319e-06	2.6967e-06	6.8949e-06	5.1435e-06	1.457e-05	1.986e-06	1.4367e-06	8.0174e-06	1.7601e-06	0
210.896	2.0293e-05	1.2242e-05	1.202e-06	5.0871e-06	4.3766e-06	5.85e-06	1.1065e-05	8.6349e-06	2.9408e-06	1.9425e-06	5.0078e-06	6.0866e-06	1.5436e-05	2.1009e-05	0
211.895	8.5488e-06	7.1073e-06	2.3833e-06	1.1588e-05	1.0291e-05	2.2034e-06	1.2993e-05	4.6465e-06	1.2044e-05	9.9011e-06	1.0011e-05	6.6057e-06	6.1748e-06	1.3744e-05	0
212.895	1.0991e-05	1.1078e-05	4.0085e-06	4.8736e-06	2.4099e-06	3.1368e-06	3.2305e-06	5.9023e-06	4.9106e-06	1.3892e-06	1.5187e-06	5.7913e-06	2.3358e-06	6.6692e-06	0
213.894	1.4859e-05	2.1587e-06	6.0485e-06	9.217e-06	2.296e-06	2.8395e-06	4.1702e-06	1.3984e-06	5.2738e-06	3.0183e-06	3.3103e-06	1.0413e-05	1.2867e-05	8.3882e-06	0
214.894	1.4719e-05	2.1615e-05	1.3772e-05	8.1262e-06	3.9814e-06	8.9359e-06	8.6603e-06	4.2865e-06	6.5856e-06	1.5426e-05	4.3608e-06	6.6453e-06	7.9352e-06	9.8479e-06	0
215.893	4.1123e-06	3.9456e-06	7.6078e-06	6.5212e-06	1.1217e-05	7.085e-06	7.9412e-06	4.453e-06	4.6395e-06	4.3871e-06	5.5589e-06	2.8994e-06	3.166e-06	1.1387e-05	0
216.893	2.6308e-06	3.9329e-06	1.1639e-05	1.109e-05	6.6337e-06	1.2243e-06	8.24e-06	1.0951e-06	6.1094e-06	4.0448e-06	1.4147e-05	7.2005e-06	6.4587e-06	6.3573e-06	0
217.892	2.4759e-05	1.2421e-06	1.1603e-05	2.8383e-06	7.2261e-06	6.9478e-06	1.3577e-05	1.0509e-06	3.1579e-06	2.3338e-06	6.3355e-06	6.6976e-06	2.1672e-06	2.366e-06	0
218.892	1.3988e-05	1.4485e-06	9.292e-06	9.5247e-06	6.8512e-06	3.4891e-06	8.475e-06	5.6733e-06	1.0017e-05	2.5666e-06	1.0748e-05	8.759e-06	1.2533e-05	5.9564e-06	0
219.891	1.4329e-07	1.761e-05	9.5551e-06	1.9859e-06	6.6437e-06	5.411e-06	8.2265e-06	5.5781e-06	8.8947e-06	5.5866e-06	3.025e-06	9.866e-06	5.4536e-06	9.6684e-06	0
220.891	7.0626e-06	2.9135e-06	7.4858e-06	7.1449e-06	5.6163e-06	3.2258e-06	6.7154e-06	2.9237e-06	2.1443e-06	6.0668e-06	5.0685e-06	3.1839e-06	3.3437e-06	6.8772e-06	0
221.89	8.9851e-06	3.7685e-06	7.397e-06	1.4224e-05	2.922e-06	7.5764e-06	3.5946e-06	4.9156e-06	4.517e-06	7.7344e-06	3.5601e-06	6.5358e-06	9.4662e-07	1.4002e-06	0
222.89	7.5031e-06	4.665e-06	5.9963e-06	4.4051e-06	1.319e-05	3.2829e-06	8.7162e-06	7.2141e-06	2.9419e-06	3.555e-06	4.1384e-06	4.2434e-06	5.8521e-06	9.9688e-06	0
223.889	1.4782e-05	8.0657e-06	3.7134e-06	8.5399e-06	8.9584e-06	1.946e-06	1.1942e-06	1.3199e-05	4.819e-06	3.7898e-06	5.1629e-06	2.8078e-06	8.2876e-06	5.5884e-06	0
224.889	1.294e-05	1.0348e-05	2.5288e-06	1.0182e-05	4.5311e-06	2.925e-06	9.3053e-06	3.6602e-06	4.1044e-06	1.6744e-06	3.1975e-06	5.4061e-06	6.047e-06	6.017e-06	0
225.888	8.9497e-06	4.2614e-06	8.5302e-06	5.8528e-06	7.1637e-06	1.0111e-05	4.5948e-06	7.017e-06	3.9971e-06	1.662e-05	1.986e-06	6.973e-06	5.7209e-06	6.2112e-06	0
226.888	6.6529e-06	4.8028e-06	2.1434e-06	5.9527e-06	4.5187e-06	4.0544e-06	2.079e-06	9.2709e-06	2.7137e-06	4.7328e-06	6.3931e-06	1.3148e-06	3.0181e-06	8.9906e-06	0
227.887	1.0029e-05	1.0179e-05	6.4941e-06	8.8745e-06	1.3926e-06	6.79e-06	8.7141e-06	3.9468e-06	4.1481e-06	2.6178e-06	7.813e-06	5.8814e-06	3.7842e-06	2.8624e-06	0
228.887	9.4631e-06	7.9124e-06	2.7483e-06	7.7458e-06	1.3991e-05	5.0695e-06	6.9865e-06	1.7421e-06	6.3952e-06	1.6236e-06	3.9284e-06	2.2746e-06	2.767e-06	1.0919e-05	0
229.886	1.3135e-05	1.153e-05	5.8735e-06	9.9744e-06	5.9878e-06	5.07e-06	5.4641e-06	4.3577e-06	2.0285e-06	5.6932e-06	4.0074e-06	1.9915e-06	2.2361e-06	7.6705e-06	0
230.886	7.9196e-06	1.0704e-05	3.564e-06	7.4197e-06	7.9644e-06	6.2213e-06	5.7083e-06	2.9717e-06	1.1904e-05	6.3273e-06	5.021e-06	3.0703e-06	3.5204e-06	3.3247e-06	0
231.885	5.1694e-06	5.4496e-06	5.0248e-06	7.1619e-07	9.7501e-06	9.488e-06	3.9111e-06	1.1608e-05	8.4065e-06	6.94e-07	1.0548e-05	7.0634e-06	8.2158e-06	1.1836e-05	0
232.885	1.052e-05	6.9143e-06	9.3771e-06	7.574e-06	1.1488e-05	4.7314e-06	3.2448e-06	1.7419e-06	7.4301e-06	2.9201e-06	5.9053e-06	8.8998e-06	7.7985e-06	1.7153e-06	0
233.884	1.0836e-05	1.9651e-06	6.8068e-06	1.9039e-06	6.4589e-06	1.6658e-06	2.8813e-06	7.1705e-06	3.5266e-06	3.013e-06	3.2844e-06	2.199e-06	1.1816e-05	3.961e-06	0
234.884	1.4572e-06	3.7921e-06	2.4563e-06	6.2936e-06	6.4079e-06	7.9399e-06	7.2701e-06	5.7548e-06	5.2777e-06	5.4042e-06	4.9279e-06	1.9426e-06	7.424e-06	4.9746e-06	0
235.883	1.6874e-05	9.3173e-06	2.8396e-06	3.2525e-06	6.905e-06	3.0409e-06	4.333e-06	1.2872e-06	3.9272e-06	8.4592e-06	5.2968e-06	3.091e-06	4.8751e-06	5.0065e-06	0
236.883	8.7613e-06	7.2147e-06	5.9721e-06	4.4247e-06	5.5068e-07	7.773e-06	6.1714e-06	1.1702e-05	4.6536e-06	4.92e-06	1.7863e-06	1.7536e-06	1.0395e-05	5.5767e-06	0
237.882	4.2004e-06	5.4852e-06	3.8372e-06	1.5324e-06	8.0932e-06	1.2472e-06	5.9077e-06	4.0747e-06	1.7893e-06	4.9642e-06	2.2594e-06	8.5499e-06	2.8511e-06	1.4956e-06	0
238.882	6.9151e-06	4.9523e-06	6.9942e-06	1.9977e-06	9.281e-06	5.678e-06	3.3392e-06	4.3506e-06	1.0234e-05	3.2987e-06	9.5115e-06	3.7799e-06	9.1046e-06	6.6471e-06	0
239.881	2.8549e-06	2.9082e-06	4.5669e-06	1.1455e-05	3.5701e-06	7.5024e-06	2.5363e-06	4.8059e-06	8.0324e-06	3.1426e-06	5.7806e-06	3.8249e-06	5.0096e-06	7.6534e-06	0
240.881	7.7426e-06	1.831e-06	7.6015e-06	7.2541e-06	1.4692e-05	5.1634e-06	4.9956e-06	5.6967e-06	7.855e-06	7.488e-06	4.7021e-06	1.6972e-06	4.3483e-06	7.3893e-06	0
241.881	8.558e-06	3.2848e-06	5.7488e-06	4.5102e-06	4.4902e-06	1.1438e-05	3.3139e-06	1.5518e-06	6.4389e-06	6.3223e-06	4.1397e-06	1.0937e-06	9.5713e-06	5.3972e-07	0
242.88	4.9691e-06	6.4719e-06	5.3678e-06	7.901e-06	1.9446e-06	2.5859e-06	6.2445e-06	4.0395e-06	1.4602e-06	5.8211e-06	8.3049e-07	7.8503e-07	3.8828e-06	8.5293e-06	0
243.88	1.2114e-05	4.8616e-06	5.1319e-06	3.6594e-06	2.8087e-06	1.0254e-05	1.3503e-06	8.9427e-06	3.2053e-06	1.2969e-05	4.9968e-06	6.8e-07	2.7599e-06	7.0623e-06	0
244.879	1.3217e-05	1.006e-05	4.4646e-06	7.6772e-06	1.0975e-05	5.0077e-06	4.0657e-06	3.4551e-06	2.1562e-06	6.3486e-06	4.1602e-06	1.8717e-06	9.6845e-06	4.7413e-06	0
245.879	1.0663e-05	2.3124e-06	2.3306e-06	1.0715e-05	7.3279e-06	2.2065e-06	5.9833e-06	7.3567e-07	4.7464e-06	3.8368e-06	2.9127e-06	1.3689e-06	7.2782e-06	4.5302e-06	0
246.878	1.171e-05	2.9543e-06	3.3823e-06	5.0585e-06	5.2982e-06	2.3695e-06	3.5667e-06	9.9146e-07	4.1242e-06	4.19e-06	5.5363e-06	2.586e-06	6.9407e-06	1.1416e-05	0
247.878	7.2154e-06	2.318e-07	2.8801e-06	7.1269e-06	9.5525e-06	3.6733e-06	5.1545e-06	1.7179e-06	2.9231e-06	3.0536e-07	2.6048e-06	4.5019e-06	6.7579e-06	2.4215e-06	0
248.877	1.1802e-05	1.256e-05	4.4454e-06	3.7105e-06	3.5674e-06	3.1934e-06	1.2503e-06	2.044e-06	6.7976e-06	3.5538e-06	2.7113e-06	1.1291e-06	4.9986e-06	1.6904e-06	0
249.877	8.3134e-06	5.7786e-06	2.5803e-06	1.067e-05	5.3893e-06	4.1588e-06	1.5029e-06	1.5025e-06	5.5904e-07	5.7078e-06	4.6533e-06	3.5783e-06	7.1372e-06	9.5097e-06	0
250.876	3.2148e-06	2.105e-06	1.8139e-06	7.2419e-06	5.4417e-06	5.2506e-06	5.0485e-07	3.7113e-06	3.0671e-06	4.603e-06	1.4161e-06	7.6411e-06	4.3544e-06	3.9021e-06	0
251.876	4.8262e-06	6.19e-06	4.555e-06	5.0021e-06	4.9871e-06	1.0468e-06	2.262e-06	5.1969e-06	6.5491e-06	1.0625e-05	5.0745e-06	3.6127e-06	4.8654e-06	3.4308e-06	0
252.875	4.2386e-06	3.9674e-06	1.3669e-05	9.1273e-06	4.3576e-06	2.466e-06	7.7982e-06	6.2223e-07	5.8803e-06	4.1116e-06	3.8935e-06	2.1132e-06	8.1204e-06	1.298e-05	0
253.875	9.2455e-06	4.6502e-06	7.2603e-06	1.0556e-05	1.0261e-06	1.2327e-06	3.8728e-06	1.5309e-06	3.5732e-06	7.7669e-06	2.6285e-06	4.9546e-06	2.5636e-06	1.939e-06	0
254.874	1.1383e-05	5.1193e-06	4.9951e-06	8.8665e-06	4.5392e-06	2.8881e-06	3.6752e-06	8.0458e-06	4.9611e-06	2.3434e-06	2.4377e-06	4.262e-06	1.1718e-05	4.52e-06	0
255.874	5.5391e-06	8.8069e-06	4.5777e-06	2.3541e-06	7.6042e-06	1.5737e-06	1.651e-06	7.5249e-06	3.2638e-06	1.8792e-06	1.7059e-06	4.365e-06	3.3962e-06	1.1572e-06	0
256.873	2.3726e-06	2.9932e-06	4.9236e-06	4.9803e-06	3.5767e-06	3.2684e-06	1.1845e-06	5.4922e-06	3.5593e-06	8.7741e-06	3.9554e-06	9.6173e-06	1.9819e-06	4.7985e-06	0
257.873	1.036e-05	2.6679e-06	7.5891e-06	4.2672e-06	5.4073e-06	3.0544e-06	2.229e-06	2.6589e-06	3.9672e-06	9.3808e-07	6.0297e-07	6.0589e-06	3.6556e-06	6.0323e-06	0
258.872	1.1952e-05	2.6226e-06	6.0516e-06	6.1678e-06	7.3014e-06	1.4745e-06	3.6738e-06	3.2489e-06	2.0067e-06	3.31e-06	7.8546e-06	3.031e-06	5.2522e-06	2.663e-06	0
259.872	1.4093e-05	4.8172e-06	3.4023e-06	2.9665e-07	2.1378e-06	4.796e-06	2.5281e-06	2.3135e-06	9.4491e-06	5.6557e-06	8.2484e-06	7.8967e-06	1.0025e-05	1.4489e-05	0
260.871	4.554e-06	5.8052e-06	2.6187e-06	6.2671e-06	2.9193e-06	3.7422e-06	5.3426e-06	2.5573e-06	4.2e-06	4.8133e-06	5.4072e-06	1.9006e-06	7.2462e-06	2.075e-06	0
261.871	1.4674e-05	5.5199e-06	1.201e-07	6.7437e-06	4.8495e-06	3.2544e-06	3.2663e-06	3.8089e-06	3.654e-06	6.7656e-06	2.307e-06	2.999e-06	9.4629e-06	3.7533e-06	0
262.87	8.3746e-07	4.4889e-06	7.9217e-06	6.0829e-06	2.2281e-06	3.5807e-06	4.5051e-06	2.3767e-06	6.0807e-06	4.254e-06	4.523e-07	1.1309e-06	9.0351e-06	4.0777e-06	0
263.87	4.7944e-06	8.587e-06	5.0305e-06	2.4156e-06	1.9363e-06	6.4975e-06	1.9806e-06	3.3367e-06	9.7577e-06	1.9396e-06	4.524e-06	4.3258e-06	5.5701e-06	3.2378e-06	0
264.869	7.0644e-06	4.0053e-06	5.8082e-06	3.024e-06	1.3064e-06	1.6024e-06	2.1405e-06	5.4081e-06	2.1892e-06	2.862e-06	4.087e-06	4.8542e-06	7.4228e-06	3.9645e-06	0
265.869	2.3969e-05	6.2455e-06	4.3418e-06	4.7258e-06	7.8983e-06	2.9545e-07	5.4729e-06	4.55e-06	1.5528e-06	7.4721e-06	4.8938e-06	2.9331e-06	8.5032e-07	2.6974e-06	0
266.868	6.2598e-06	7.2045e-06	8.123e-06	3.8428e-06	2.7091e-06	6.1174e-06	3.0281e-06	2.2713e-06	7.251e-06	6.3649e-06	9.1577e-06	4.2668e-06	9.8805e-06	5.1935e-06	0
267.868	6.5436e-06	5.2094e-06	1.0432e-06	5.5163e-06	3.8223e-07	4.7554e-06	3.8418e-06	2.5841e-06	3.0224e-06	5.5805e-06	6.3114e-06	5.6796e-06	2.1207e-06	3.6767e-06	0
268.867	8.7556e-06	4.9925e-06	5.6686e-06	2.5575e-06	1.1463e-06	1.8408e-06	2.8497e-06	3.7038e-06	2.479e-06	2.9059e-06	6.9158e-06	2.1327e-06	2.9427e-06	7.8257e-06	0
269.867	1.3217e-05	4.8288e-06	6.1245e-06	6.3044e-06	2.7876e-06	6.2414e-06	2.8129e-06	5.5884e-06	6.6876e-06	3.4676e-06	4.9741e-06	3.1131e-06	9.8544e-06	5.2963e-06	0
270.866	1.7535e-06	2.3128e-06	1.0852e-06	3.3864e-06	1.7862e-06	2.7446e-06	2.429e-06	1.4903e-06	1.1677e-06	1.7724e-06	4.7197e-06	2.964e-06	5.3905e-06	2.2699e-06	0
271.866	3.3776e-06	3.7147e-06	2.6406e-06	3.1976e-06	1.9253e-06	3.883e-06	4.3564e-06	5.101e-06	4.507e-06	6.9213e-06	5.9306e-06	4.4996e-06	8.457e-06	5.6952e-06	0
272.865	6.3302e-06	2.4027e-06	3.8119e-06	3.9526e-06	1.1098e-06	3.3663e-06	1.8686e-06	4.9326e-06	4.7813e-06	8.8688e-06	1.4003e-06	4.8746e-06	8.9806e-06	8.4909e-06	0
273.865	2.3716e-06	3.9905e-06	1.4676e-06	3.3517e-06	9.082e-06	7.9878e-07	2.1361e-06	5.8141e-06	1.9984e-06	9.4418e-06	2.2059e-06	3.6377e-06	5.0526e-06	1.0426e-06	0
274.864	3.9688e-06	2.44e-06	1.278e-06	1.1469e-06	3.1799e-06	4.0143e-06	6.4566e-06	2.3161e-06	3.1434e-06	4.2598e-06	4.7448e-06	5.91e-06	4.0767e-06	1.1007e-05	0
275.864	1.13e-05	2.3116e-06	6.6597e-06	4.2784e-06	4.9054e-06	2.2313e-06	7.9376e-06	8.2096e-07	3.5741e-06	5.5792e-06	6.5131e-06	4.442e-06	4.4643e-06	2.7271e-06	0
276.863	5.5848e-06	1.9813e-06	3.302e-06	4.4006e-06	3.5353e-06	3.6353e-06	1.8811e-06	5.7532e-06	5.7842e-06	2.4057e-06	4.4649e-06	3.8236e-06	4.821e-06	3.2013e-06	0
277.863	5.2996e-06	9.0592e-06	1.7515e-06	7.2735e-06	5.4593e-06	2.5194e-06	3.9232e-06	4.2947e-06	5.7463e-06	5.6926e-06	4.7812e-06	1.7162e-06	6.8978e-06	9.5829e-06	0
278.862	9.4214e-06	1.5704e-06	1.1872e-06	5.5572e-06	6.1929e-06	4.508e-06	1.7929e-06	1.957e-06	1.0591e-06	1.6617e-06	4.2135e-06	3.7885e-06	2.1868e-06	4.5727e-06	0
279.862	7.6708e-06	4.2556e-06	7.9365e-06	1.9739e-06	1.5342e-06	5.2898e-06	5.3123e-06	5.4215e-07	2.0068e-06	1.6372e-06	2.5219e-06	4.8101e-06	7.1322e-06	9.4855e-07	0
280.861	4.8419e-06	4.4533e-06	3.5345e-06	1.5119e-06	4.5072e-06	3.1837e-06	6.2276e-06	2.3173e-06	1.6142e-06	8.508e-06	3.6487e-06	1.9554e-06	4.8765e-06	4.8039e-06	0
281.861	7.3966e-06	1.9808e-06	4.5598e-06	7.4206e-06	4.5604e-06	2.9814e-06	3.3269e-06	6.1499e-06	6.5611e-06	2.6632e-06	4.266e-06	4.2275e-06	5.6677e-06	2.506e-06	0
282.86	5.4141e-06	2.9451e-06	4.8826e-07	2.9736e-06	1.773e-06	6.38e-06	4.5722e-06	4.0164e-06	7.1462e-06	1.7475e-06	1.9334e-06	4.0859e-06	3.5455e-06	5.8948e-06	0
283.86	6.5109e-06	2.654e-06	2.1418e-06	6.2043e-06	3.8808e-06	2.3703e-06	2.4974e-06	2.8634e-06	1.5671e-06	4.1558e-06	5.2087e-06	5.5804e-06	6.014e-06	7.8434e-06	0
284.859	8.3238e-06	6.1151e-06	5.6392e-06	1.3512e-06	2.859e-06	3.6723e-06	7.1978e-07	1.0211e-06	6.0529e-06	5.3695e-06	3.5937e-06	2.4758e-06	5.6245e-06	7.6095e-06	0
285.859	7.9369e-06	2.2781e-06	5.9859e-06	5.1722e-07	3.1778e-06	2.7149e-06	3.0042e-06	3.0391e-06	4.5142e-06	1.6208e-06	3.3787e-07	5.0954e-06	6.2961e-06	2.7547e-06	0
286.858	5.8815e-06	5.5293e-06	2.87e-06	3.5706e-06	8.2572e-06	3.8683e-06	3.0355e-07	2.3565e-06	5.4734e-06	6.5277e-06	1.9807e-06	2.721e-06	4.0361e-06	6.521e-06	0
287.858	1.0932e-05	3.018e-06	3.0129e-06	3.1744e-06	4.3614e-06	1.9027e-06	5.8943e-06	2.0569e-06	1.1535e-05	6.2256e-06	3.6998e-06	5.4686e-06	5.0722e-06	5.555e-06	0
288.857	1.6224e-05	1.585e-05	3.9416e-06	1.356e-05	9.9025e-06	2.7703e-06	1.9323e-06	2.327e-06	1.5581e-05	1.098e-05	1.2456e-05	7.1672e-06	1.9334e-06	5.5314e-06	0
289.857	1.0611e-05	4.0123e-06	3.2559e-06	7.5039e-06	6.3448e-06	1.8305e-06	2.0645e-06	5.0837e-06	2.9911e-06	6.322e-06	5.4927e-06	4.1593e-06	8.0215e-06	3.2203e-06	0
290.856	6.0635e-06	2.8839e-06	2.9232e-06	1.9236e-06	4.1558e-06	2.1017e-06	5.1926e-06	2.1798e-06	5.8585e-06	3.3664e-06	4.0824e-06	4.429e-06	9.2818e-07	3.6762e-06	0
291.856	2.8568e-06	2.9521e-06	4.713e-06	7.9141e-06	1.8305e-06	5.0765e-06	3.6387e-06	3.1258e-06	1.566e-06	4.9232e-06	3.0324e-06	4.4961e-06	2.6925e-06	5.4452e-06	0
292.855	1.1682e-05	2.9753e-06	4.6648e-06	1.8225e-06	6.5883e-06	1.8805e-06	5.97e-06	1.648e-06	3.2105e-06	2.2236e-06	2.9732e-06	1.3336e-06	4.2642e-06	2.9239e-06	0
293.855	4.0692e-06	4.7969e-06	1.5324e-06	1.2776e-06	4.2082e-06	4.2802e-06	3.1117e-06	2.3571e-06	1.7816e-06	3.4415e-06	1.379e-06	4.3779e-06	3.8671e-07	1.4271e-06	0
294.854	5.7657e-06	5.2582e-06	2.6166e-06	3.0231e-06	4.2702e-06	4.5925e-06	9.9986e-07	8.327e-07	2.8106e-06	3.5281e-06	6.8322e-06	3.0586e-06	6.5303e-06	3.6736e-06	0
295.854	2.5742e-06	5.0366e-06	1.9268e-06	6.4485e-06	6.6527e-06	2.5858e-06	4.6102e-06	5.3189e-06	3.345e-06	5.9058e-06	3.4804e-06	4.1254e-06	7.2083e-06	1.7536e-06	0
296.853	3.5774e-06	3.3031e-06	1.288e-06	1.4418e-06	7.0243e-06	4.1785e-06	2.359e-06	3.0609e-06	1.1542e-06	4.969e-06	3.6573e-07	1.5567e-06	6.989e-06	3.2032e-06	0
297.853	1.75e-06	7.6889e-06	2.0878e-06	9.1039e-06	4.1211e-06	2.2986e-06	5.8415e-06	2.1075e-06	1.31e-06	1.1888e-06	5.1443e-06	4.8804e-06	2.8011e-06	2.182e-06	0
298.852	1.0565e-05	9.826e-06	1.8411e-06	2.7655e-06	3.3365e-06	2.3001e-06	3.593e-06	2.6719e-06	2.0926e-06	3.003e-06	8.5406e-06	3.2548e-07	5.7078e-06	4.8104e-06	0
299.852	2.2803e-06	1.2548e-06	6.5352e-06	2.6544e-06	6.6967e-06	2.1732e-06	3.8829e-06	1.6743e-06	3.9384e-06	6.7902e-06	2.3627e-06	5.0914e-06	6.7257e-06	3.3656e-06	0
300.851	6.251e-06	1.4593e-06	4.3303e-06	4.6365e-06	4.2593e-06	6.2722e-06	9.4789e-07	2.0899e-06	1.358e-06	1.2644e-06	6.523e-07	1.2752e-06	3.3493e-06	2.8343e-06	0
301.851	2.7135e-06	2.9428e-06	1.8559e-06	3.5382e-06	4.2325e-06	2.0184e-06	3.6686e-06	3.0563e-06	1.1968e-06	4.7875e-06	1.8366e-06	3.8071e-06	1.0177e-06	4.504e-06	0
302.85	2.7211e-06	6.4112e-06	1.5932e-06	7.446e-06	4.529e-06	6.6676e-06	4.9955e-06	1.2077e-06	1.0814e-06	2.3107e-06	3.0856e-06	1.7943e-06	5.8037e-06	7.5724e-06	0
303.85	4.7782e-06	4.5661e-06	5.4006e-06	6.7926e-06	5.6245e-06	3.3276e-06	1.0304e-06	3.4713e-06	3.8686e-06	4.7429e-06	7.743e-06	3.2694e-06	1.43e-06	5.4865e-06	0
304.849	4.5148e-06	7.7621e-07	2.531e-06	2.2329e-06	4.6599e-06	2.6078e-06	5.1443e-06	1.3992e-06	4.5487e-06	2.5747e-06	2.1921e-06	3.107e-06	5.7708e-06	4.9455e-06	0
305.849	5.3832e-06	6.2472e-06	4.1705e-06	2.1031e-06	7.7637e-07	4.8167e-07	2.6777e-06	1.1291e-06	1.8976e-06	4.9425e-06	3.3735e-06	1.6552e-06	4.5829e-06	2.361e-06	0
306.848	1.5882e-06	1.4273e-06	2.6053e-06	2.3945e-06	1.4489e-06	2.2673e-06	2.3603e-06	2.9211e-06	1.7704e-06	3.6446e-06	5.6523e-06	1.7713e-06	4.1965e-06	3.6233e-06	0
307.848	7.4556e-06	3.5551e-06	3.4664e-06	2.7938e-06	2.1201e-06	3.5065e-06	2.916e-06	3.8361e-06	3.8855e-06	4.0082e-06	6.4495e-06	1.0253e-06	4.075e-06	1.3843e-06	0
308.847	5.8157e-06	2.4408e-06	1.3975e-06	2.6217e-06	3.8703e-06	7.6545e-07	3.1845e-06	2.419e-06	4.5629e-06	2.5334e-06	1.355e-06	2.7831e-06	4.4794e-06	2.6641e-06	0
309.847	6.0636e-06	2.7545e-06	2.9455e-06	4.5095e-06	4.8696e-06	4.099e-06	2.5421e-06	3.3767e-06	2.4294e-06	1.7379e-06	4.2305e-06	2.7792e-06	4.5701e-06	2.1421e-06	0
310.846	7.0155e-06	2.9195e-06	2.0878e-06	1.3874e-06	3.7547e-06	4.7567e-06	1.3708e-06	1.3507e-06	1.3143e-06	1.2484e-06	3.3782e-06	2.3979e-06	4.9313e-06	2.9087e-06	0
311.846	3.6097e-06	3.6714e-06	1.4898e-06	7.1272e-07	1.111e-06	3.5722e-06	6.0294e-06	3.7796e-06	1.735e-06	4.4106e-06	2.0729e-06	2.7415e-06	3.4111e-06	2.216e-06	0
312.845	1.1965e-06	2.5146e-06	2.2678e-06	6.085e-07	8.3599e-07	4.868e-06	2.4011e-06	2.7539e-06	3.8458e-06	3.0997e-06	6.8311e-06	2.6087e-06	3.2504e-06	3.3375e-06	0
313.845	6.9679e-06	3.217e-06	3.1657e-06	1.6574e-06	2.7513e-06	4.0258e-06	2.5533e-06	7.9578e-07	5.4986e-06	2.0788e-06	4.9862e-06	5.6221e-06	3.0268e-06	7.8066e-06	0
314.844	4.4701e-06	2.3596e-06	4.0132e-06	1.6926e-06	4.8867e-06	1.288e-06	3.4676e-06	2.5983e-06	1.5745e-06	6.9025e-06	2.9685e-06	1.7129e-06	4.2212e-06	4.0275e-06	0
315.844	4.6844e-06	3.3702e-06	2.9217e-06	9.698e-07	6.9211e-06	2.7005e-06	3.9266e-06	2.211e-06	1.7654e-06	2.1694e-06	2.8306e-06	1.114e-06	2.182e-06	4.3549e-06	0
316.843	4.7462e-06	1.7364e-06	5.3444e-06	5.1424e-06	9.6897e-06	7.8847e-07	1.0554e-06	2.1729e-06	4.3539e-06	2.2835e-06	2.3305e-06	2.9003e-06	8.0819e-06	4.458e-06	0
317.843	2.0955e-06	2.7434e-06	2.019e-06	2.1536e-06	4.5602e-06	2.1284e-06	1.3715e-06	2.0426e-06	2.3312e-06	2.9788e-06	3.9577e-06	3.31e-06	1.4264e-06	5.5725e-06	0
318.842	5.2949e-06	3.3592e-06	3.1036e-06	3.6342e-06	1.7579e-06	3.5315e-07	2.5671e-06	4.0975e-06	2.453e-06	3.1133e-06	2.8877e-06	2.8086e-06	6.4336e-07	3.0242e-06	0
319.842	2.7963e-06	1.5524e-06	1.8892e-06	1.3745e-06	1.9298e-06	4.4262e-06	3.6388e-06	5.1722e-06	9.2719e-07	3.2486e-06	4.1674e-06	3.5687e-06	4.2262e-06	8.1435e-07	0
320.841	2.4323e-06	3.4227e-06	3.0176e-06	6.4766e-06	6.3722e-06	1.3113e-06	3.8106e-07	1.9128e-06	2.0009e-06	3.2533e-06	6.982e-07	1.7365e-06	1.0165e-06	1.0788e-06	0
321.841	8.8601e-06	1.7829e-06	4.2553e-06	6.3056e-06	1.5099e-06	4.9909e-07	2.366e-06	3.4449e-06	1.6215e-06	2.701e-06	3.4567e-06	3.0181e-06	4.2441e-06	3.898e-06	0
322.841	7.8968e-06	3.4309e-06	3.3103e-06	3.1494e-06	4.9312e-06	3.0798e-06	9.7864e-07	2.4627e-06	3.9197e-06	1.4006e-06	2.9966e-06	3.1456e-06	3.2082e-06	2.844e-06	0
323.84	2.2004e-06	4.7928e-06	2.1439e-06	4.3109e-06	4.2031e-07	3.9374e-06	2.4391e-06	2.4061e-06	2.2233e-06	1.775e-06	1.8592e-06	2.2011e-06	2.1857e-06	1.0572e-06	0
324.84	7.2846e-06	3.2256e-06	3.4327e-06	5.5429e-06	2.3787e-06	4.7975e-06	3.028e-06	3.2666e-06	2.0581e-06	3.6482e-06	5.1009e-06	6.7205e-06	5.6807e-06	2.404e-06	0
325.839	3.6576e-06	3.3174e-06	1.386e-06	7.866e-06	3.8176e-06	2.1874e-06	2.0788e-06	2.7135e-06	3.6988e-06	3.0201e-06	2.754e-06	5.1997e-06	4.1636e-06	4.4574e-06	0
326.839	6.9452e-06	3.7872e-06	2.4974e-06	2.2526e-06	6.046e-06	2.553e-06	3.3393e-06	1.1835e-06	4.3954e-06	2.8299e-06	9.6007e-07	4.699e-06	5.5321e-06	2.9983e-06	0
327.838	2.4445e-06	1.7375e-06	4.3407e-06	3.6576e-06	3.853e-06	2.039e-06	2.3017e-06	4.2516e-06	2.4633e-06	2.1137e-06	1.0981e-06	3.3873e-06	4.8072e-06	2.2518e-06	0
328.838	3.457e-06	2.3295e-06	2.9865e-06	1.9403e-06	3.6206e-06	1.8022e-06	2.3037e-06	1.6425e-06	2.5971e-06	1.6491e-06	5.035e-06	2.9136e-06	6.0629e-06	4.1734e-06	0
329.837	1.5243e-06	1.6849e-06	3.7827e-06	2.249e-06	2.2269e-06	2.5947e-06	3.1712e-06	2.1124e-06	3.2249e-06	3.1367e-06	1.8821e-07	3.7244e-06	5.2755e-06	1.3452e-06	0
330.837	6.7076e-06	3.8152e-06	2.422e-06	2.897e-07	3.4709e-06	4.5836e-06	2.7912e-06	2.562e-06	8.7601e-07	4.45e-06	4.0235e-06	2.4759e-06	1.3369e-06	2.6769e-06	0
331.836	4.0729e-06	2.2891e-06	3.1364e-06	1.9114e-06	8.3421e-06	1.4346e-06	8.9561e-07	2.4873e-06	3.9968e-06	2.3633e-06	3.0443e-06	3.3877e-06	5.8747e-06	2.9589e-07	0
332.836	2.6312e-06	4.836e-06	3.6176e-06	3.9578e-06	5.4133e-06	1.3776e-06	2.3219e-06	2.0117e-06	4.0199e-06	5.159e-06	6.5054e-06	2.676e-06	4.3316e-06	8.2086e-07	0
333.835	6.5944e-06	4.3755e-06	1.1513e-06	3.972e-06	7.0381e-07	1.6445e-06	3.5431e-06	1.0126e-06	1.9439e-06	6.1243e-06	1.6367e-06	2.1415e-06	1.2364e-06	2.2431e-06	0
334.835	5.7607e-06	1.1384e-06	1.4727e-06	4.6565e-06	5.3244e-06	1.8241e-06	5.1773e-06	4.846e-06	1.6296e-06	4.2549e-06	2.8147e-06	2.9696e-06	2.0554e-06	1.1842e-06	0
335.834	6.1901e-07	2.9797e-06	3.3474e-06	2.7273e-06	4.005e-06	2.1438e-06	2.9565e-06	2.032e-06	1.695e-06	2.6012e-06	1.0374e-06	2.6469e-06	7.7519e-06	6.2057e-07	0
336.834	6.1257e-06	1.5336e-06	1.0617e-06	4.8753e-06	3.0048e-06	2.9716e-06	2.8871e-06	4.2533e-06	5.0957e-06	4.6681e-06	5.7445e-06	7.2165e-07	4.5726e-06	3.1132e-06	0
337.833	4.8767e-06	2.1585e-06	1.4317e-06	3.6395e-06	4.1612e-06	2.285e-07	1.0108e-06	3.5532e-07	1.1705e-06	1.4273e-06	5.1625e-06	4.3204e-06	5.5159e-06	1.6782e-06	0
338.833	3.8801e-06	1.647e-06	1.5672e-06	3.4771e-06	2.3335e-06	4.0935e-06	9.4211e-07	5.1699e-06	3.6039e-06	2.3842e-06	2.7756e-06	2.0782e-06	5.0405e-06	2.5305e-06	0
339.832	1.2692e-05	3.6659e-06	2.9184e-06	1.2911e-06	1.0061e-06	2.5393e-06	2.0317e-06	3.0748e-06	5.0721e-06	2.4787e-06	4.0057e-06	2.6862e-06	4.4942e-06	4.5881e-06	0
340.832	7.9601e-06	6.794e-06	3.2831e-06	1.101e-06	4.5307e-06	4.9757e-06	5.0652e-06	3.559e-06	1.657e-06	3.0279e-06	2.2534e-06	4.8795e-07	2.6513e-06	3.1705e-06	0
341.831	5.382e-06	2.605e-06	3.2553e-06	1.4697e-06	3.402e-06	1.7511e-06	1.1976e-06	1.4895e-06	8.5051e-07	3.0308e-06	3.8152e-06	1.3202e-06	4.1433e-06	6.2192e-06	0
342.831	7.5004e-06	2.6418e-06	3.0798e-06	3.4299e-06	4.1041e-06	2.9498e-06	1.723e-06	2.2274e-06	5.6513e-06	2.5549e-06	2.5122e-06	3.1922e-06	6.0949e-06	2.0512e-06	0
343.83	1.9964e-06	4.7782e-06	2.2359e-06	2.6526e-06	3.1441e-06	2.424e-06	3.8288e-06	2.1167e-06	2.7821e-06	2.5674e-06	2.2677e-06	8.0542e-07	9.3875e-07	4.2399e-06	0
344.83	2.5757e-06	4.4062e-06	9.0792e-07	1.1012e-06	5.0735e-06	4.1281e-06	4.2382e-06	9.4691e-07	2.0882e-06	4.0634e-06	2.472e-07	3.5485e-06	2.7156e-06	2.2459e-06	0
345.829	1.9771e-06	2.2732e-06	2.0178e-06	1.4902e-06	3.9509e-06	3.4676e-06	2.262e-06	1.8837e-06	1.5505e-06	3.8841e-06	3.7003e-06	3.0781e-06	5.5376e-06	7.322e-06	0
346.829	5.7667e-06	2.0229e-06	2.0566e-06	6.5692e-06	4.6682e-06	2.5549e-06	3.8196e-06	4.5618e-06	3.9087e-07	4.5036e-06	1.5421e-06	3.6153e-06	3.6105e-06	1.7026e-06	0
347.828	6.9129e-06	2.6322e-06	2.9457e-06	1.3379e-06	1.6657e-06	1.2414e-06	1.7174e-06	1.8202e-06	2.8401e-06	1.8523e-06	3.8437e-06	5.832e-07	1.1274e-06	1.8079e-06	0
348.828	4.4452e-06	4.2674e-06	3.2329e-06	2.3582e-06	1.7448e-06	4.8106e-06	1.7088e-06	1.0326e-06	3.8112e-06	4.5116e-06	2.4905e-06	2.7818e-06	1.6669e-06	2.1966e-06	0
349.827	5.8418e-06	4.2944e-06	3.0882e-06	1.2066e-06	2.4847e-06	2.365e-06	2.4775e-06	8.565e-07	1.6851e-06	2.6237e-06	4.0999e-06	1.1793e-06	3.6008e-06	3.5877e-06	0
350.827	4.9725e-06	2.406e-06	2.059e-06	1.8345e-06	4.2425e-06	1.8443e-06	2.683e-06	4.0578e-06	1.3648e-06	6.8683e-07	6.9263e-07	1.4496e-06	3.8453e-06	8.3333e-07	0
351.826	4.772e-06	4.9071e-06	3.06e-06	3.48e-06	8.345e-07	3.9323e-06	2.679e-06	2.4823e-06	3.3468e-06	3.3678e-06	7.8781e-06	3.7536e-06	2.6515e-06	1.8712e-06	0
352.826	4.5251e-06	1.1688e-06	5.7259e-06	5.6427e-06	1.1779e-06	6.6755e-07	1.2006e-06	2.4485e-06	3.674e-06	4.6761e-06	2.3483e-06	3.2092e-06	3.0825e-06	1.1623e-06	0
353.825	2.4506e-06	2.1475e-06	3.6958e-06	1.3139e-06	2.8556e-06	2.7541e-06	7.736e-07	1.8178e-06	1.4146e-06	1.8865e-06	2.6239e-06	7.595e-07	3.7725e-06	2.2696e-06	0
354.825	2.1945e-06	1.5465e-06	2.8072e-06	6.0024e-06	6.2742e-06	9.1584e-07	1.412e-06	2.0032e-06	1.188e-06	6.2484e-06	2.724e-06	1.3814e-06	2.5223e-06	2.0652e-06	0
355.824	5.2433e-06	4.3177e-06	2.5342e-06	2.5462e-06	9.805e-07	2.5237e-06	2.1507e-06	2.5279e-06	3.9855e-07	1.4322e-06	1.6496e-06	3.6154e-06	4.0168e-06	1.847e-06	0
356.824	1.8098e-06	4.9843e-06	3.3322e-06	5.4502e-06	2.7154e-06	9.7541e-07	2.0128e-06	2.2959e-06	2.3923e-06	2.3308e-06	1.0837e-06	9.4531e-07	2.6523e-06	1.0711e-06	0
357.823	3.0075e-06	2.7635e-06	4.1352e-06	3.9594e-06	5.8672e-06	5.1761e-06	8.2916e-07	2.2732e-06	2.2087e-06	4.6069e-06	4.9586e-06	1.2819e-06	6.298e-06	4.5485e-06	0
358.823	4.1424e-06	1.3391e-06	3.3707e-06	2.6911e-06	2.6793e-06	1.4533e-06	1.0091e-06	3.5706e-06	2.7222e-06	8.8138e-07	2.6231e-06	1.606e-06	2.3804e-06	1.0902e-06	0
359.822	4.015e-07	1.3274e-06	2.6641e-06	3.1883e-06	2.5107e-06	1.9907e-06	1.0353e-06	3.0113e-06	2.9507e-06	1.4318e-06	1.4223e-06	2.5731e-06	2.8688e-06	6.7204e-07	0
360.822	5.7106e-07	2.5e-06	2.1841e-06	4.652e-06	3.5883e-06	3.7391e-06	2.6722e-06	1.9816e-06	3.1213e-06	3.9932e-06	9.9386e-07	2.8242e-06	4.8963e-06	3.5061e-06	0
361.821	4.7709e-06	9.7976e-07	3.1526e-06	4.2627e-07	1.7315e-06	3.1072e-06	6.2044e-07	1.9337e-06	1.7787e-06	3.1903e-06	1.9701e-06	7.9473e-07	3.3304e-06	3.2238e-06	0
362.821	2.3999e-06	2.9459e-06	4.2804e-07	3.9356e-06	5.2672e-06	3.4538e-06	1.0957e-06	2.7518e-06	2.1031e-06	2.3668e-06	1.9535e-06	3.2789e-06	4.1293e-06	2.6264e-07	0
363.82	9.0687e-06	9.7163e-07	4.3569e-06	4.094e-06	2.7382e-06	3.313e-06	3.5824e-06	5.0015e-07	1.412e-06	1.8112e-06	3.0487e-06	2.3119e-06	3.3494e-06	1.9423e-06	0
364.82	5.3068e-06	3.0301e-06	5.1939e-06	4.3781e-06	2.2115e-06	3.1883e-06	8.0302e-07	1.0899e-06	4.321e-06	2.397e-06	1.0742e-06	8.132e-07	3.7544e-06	2.3348e-06	0
365.819	5.4822e-06	2.5837e-06	2.2171e-06	2.0828e-06	5.4193e-06	1.2809e-06	1.0907e-06	2.8349e-06	2.2196e-06	9.9325e-07	1.7897e-06	2.3442e-06	4.9434e-06	2.5599e-06	0
366.819	3.2185e-06	1.6093e-06	2.0029e-06	5.3289e-07	4.2469e-06	3.5722e-06	2.9386e-06	1.1566e-06	2.2436e-07	2.1345e-06	2.9124e-06	3.4202e-06	3.8519e-06	3.0907e-06	0
367.818	3.9484e-06	6.9733e-07	3.0746e-06	2.8891e-06	2.5557e-06	1.9112e-06	4.3604e-06	1.2208e-06	3.6161e-06	3.8729e-06	4.0509e-07	2.0279e-06	5.0135e-06	2.54e-07	0
368.818	4.6553e-07	3.7783e-06	7.6943e-07	2.9947e-06	2.9366e-07	3.0296e-06	3.1815e-06	1.0081e-06	1.6551e-06	1.1088e-06	6.7496e-06	1.963e-06	2.8524e-06	5.4174e-06	0
369.817	4.1602e-06	1.3261e-06	2.4003e-06	4.9464e-06	3.3303e-06	2.5731e-06	4.6308e-06	2.1153e-06	2.3393e-06	1.3878e-06	3.2879e-06	3.1459e-06	5.3161e-06	2.9041e-06	0
370.817	1.9708e-06	2.7596e-06	2.7091e-06	4.8035e-06	1.7174e-06	7.1282e-07	5.8224e-07	1.9349e-06	1.6844e-06	6.7019e-07	1.4646e-06	2.0893e-06	2.2374e-06	1.6263e-06	0
371.816	4.9361e-06	2.6299e-06	2.1002e-06	1.1308e-06	2.9056e-06	1.7977e-06	2.7799e-06	9.5526e-07	1.7858e-06	5.4286e-06	2.9759e-06	8.3599e-07	4.2627e-06	1.4887e-06	0
372.816	3.7336e-06	1.5932e-06	4.2917e-07	2.6173e-06	3.7612e-06	2.4177e-06	2.3602e-06	1.718e-06	1.7519e-06	1.9984e-06	3.4273e-06	1.3489e-06	3.895e-06	3.1408e-06	0
373.815	2.2754e-06	1.4919e-06	2.1021e-06	1.3426e-06	2.9146e-06	1.4487e-06	2.0393e-06	6.0384e-07	2.8842e-06	2.3364e-06	3.2471e-06	1.3552e-06	3.137e-06	9.5883e-08	0
374.815	2.4981e-06	4.2244e-06	3.7856e-06	2.7584e-06	2.2443e-06	1.8732e-06	1.5073e-06	2.7113e-06	2.6716e-06	2.4874e-06	3.4887e-06	1.3332e-06	2.4956e-06	1.4294e-06	0
375.814	3.8376e-06	4.4494e-06	1.4397e-06	3.0597e-06	2.8171e-06	2.7114e-06	1.205e-06	6.7795e-07	1.5408e-06	3.276e-06	1.5448e-06	1.8251e-06	4.0518e-06	2.3377e-06	0
376.814	6.2793e-06	4.9317e-06	2.6831e-06	9.2904e-07	5.9341e-06	2.3326e-06	2.9957e-06	1.2164e-06	1.9481e-06	2.7083e-06	2.0213e-06	3.2144e-06	2.1214e-06	2.119e-06	0
377.813	6.3305e-06	1.6703e-06	2.9093e-06	2.7225e-06	2.0062e-06	3.4584e-06	2.4805e-06	5.6528e-06	1.8673e-06	3.2487e-06	4.8719e-06	9.0456e-07	2.8167e-06	1.6351e-06	0
378.813	6.8655e-06	2.1158e-06	2.9348e-06	3.6826e-06	1.5015e-06	2.0559e-06	1.2972e-06	1.3036e-06	2.4205e-06	4.2598e-06	2.4599e-06	2.3593e-06	2.3843e-06	3.3325e-06	0
379.812	3.5399e-06	1.6919e-06	1.1265e-06	3.719e-06	9.874e-07	1.7261e-06	3.1629e-06	2.6294e-06	2.7541e-06	1.7998e-06	7.4355e-07	7.6458e-07	3.8864e-06	2.0986e-06	0
380.812	5.5821e-06	4.3829e-06	1.432e-06	5.0507e-06	6.7649e-06	1.6075e-06	2.3013e-06	2.223e-07	8.4681e-07	9.9542e-07	1.943e-06	9.74e-07	2.9109e-06	5.6065e-06	0
381.811	4.4508e-07	1.8936e-06	3.3092e-06	2.9621e-06	1.517e-06	1.9654e-06	1.2914e-06	1.7518e-06	2.2697e-06	1.5002e-06	3.2053e-06	3.9738e-06	4.0375e-06	1.126e-06	0
382.811	1.2315e-06	3.2195e-06	2.5001e-06	8.6855e-07	3.4044e-06	2.6458e-06	6.7768e-07	2.2027e-06	1.7248e-06	5.2058e-06	2.4131e-06	6.5017e-07	3.2771e-06	4.2864e-07	0
383.81	5.0157e-06	2.3823e-06	1.8972e-06	2.8744e-06	3.331e-06	2.2088e-06	1.9941e-06	2.7128e-06	2.2671e-06	4.5839e-06	2.038e-06	1.6647e-06	1.7229e-06	1.7751e-06	0
384.81	7.8011e-06	4.0997e-06	3.1845e-06	3.0297e-06	7.7706e-06	1.9821e-06	1.6202e-06	6.624e-07	1.5728e-06	5.5997e-06	3.9913e-06	9.4181e-07	2.6514e-06	3.0564e-06	0
385.809	5.4703e-06	2.5404e-06	1.3176e-06	3.9202e-06	4.113e-06	1.0314e-06	7.4053e-07	2.9067e-06	1.0155e-06	1.3688e-06	2.1194e-06	4.4775e-06	3.2223e-06	1.8263e-06	0
386.809	3.5802e-06	1.0808e-06	2.6131e-06	1.9354e-06	3.9105e-06	2.0252e-06	4.7922e-08	6.5488e-07	4.8549e-06	3.972e-06	2.572e-06	2.9229e-06	3.1435e-06	1.4218e-06	0
387.808	4.0288e-06	3.0546e-06	3.4453e-06	1.8496e-06	4.3596e-06	9.0872e-07	2.893e-06	2.7012e-06	2.3147e-06	2.7287e-06	1.4132e-06	2.9739e-06	3.0803e-06	1.3664e-06	0
388.808	2.3535e-06	5.1017e-06	1.4779e-06	2.0418e-06	2.4078e-06	1.4879e-06	1.1037e-06	1.5082e-06	2.783e-06	4.9287e-07	6.0776e-07	1.4034e-06	5.4703e-06	1.6444e-06	0
389.807	2.2809e-06	2.3187e-06	2.0417e-06	2.1667e-06	2.773e-06	2.0027e-07	2.7928e-06	1.0415e-06	2.035e-06	6.4186e-07	3.4177e-06	2.7976e-06	2.1472e-06	2.9844e-06	0
390.807	6.1181e-06	2.1237e-06	9.4782e-07	2.602e-06	2.6515e-06	1.3836e-06	8.4301e-07	1.4352e-06	3.6934e-06	1.4648e-06	1.2739e-06	8.4507e-07	5.0063e-06	1.4488e-06	0
391.806	3.2393e-06	4.4347e-06	8.4509e-07	2.0717e-06	3.2508e-06	3.4072e-06	2.7253e-06	1.5287e-06	1.1633e-06	1.4237e-06	2.1379e-06	1.162e-06	4.0325e-06	1.9303e-06	0
392.806	3.6633e-06	1.5173e-06	5.5182e-07	3.001e-06	9.7958e-07	2.0968e-06	3.9774e-07	2.5788e-06	5.5922e-07	2.0649e-06	2.0512e-06	2.1472e-06	2.871e-06	1.242e-06	0
393.805	3.6519e-06	2.4059e-06	3.2784e-06	4.2751e-06	2.4127e-06	1.6408e-06	4.3488e-07	2.0082e-06	1.2518e-06	2.0181e-06	1.6277e-06	1.5395e-06	4.4315e-06	7.8838e-07	0
394.805	1.8669e-06	4.1856e-06	2.1976e-06	1.5172e-06	3.8385e-06	3.4556e-06	4.1189e-06	2.9252e-06	2.7831e-07	2.0668e-06	2.3304e-06	3.5754e-06	4.57e-06	3.0303e-06	0
395.804	4.4344e-06	2.6338e-06	2.3145e-07	1.2496e-06	4.2949e-06	1.629e-06	2.2457e-06	2.8776e-06	3.2968e-06	1.4872e-06	5.152e-07	3.0258e-06	4.0361e-06	1.2502e-06	0
396.804	1.8694e-06	1.5561e-06	7.9273e-07	2.0003e-06	1.4181e-06	6.1048e-07	7.4833e-07	1.9415e-06	8.8639e-07	1.0092e-06	1.8768e-06	2.6573e-06	4.2535e-06	2.0959e-06	0
397.803	3.1387e-06	1.7994e-07	3.0778e-06	3.0094e-06	5.0498e-06	3.3343e-06	9.5312e-07	2.8853e-06	1.2775e-06	2.2237e-06	2.0584e-06	2.5438e-06	5.1243e-06	1.951e-06	0
398.803	1.5204e-06	1.9614e-06	1.3476e-06	2.1062e-06	3.2801e-06	2.7921e-06	8.2153e-07	9.1784e-07	1.2247e-06	2.0194e-06	1.1968e-06	1.5199e-06	6.2613e-06	1.7674e-06	0
399.803	3.9338e-06	3.2912e-06	3.0773e-06	1.5872e-06	9.7888e-07	1.1792e-06	9.0929e-07	1.4156e-06	3.3851e-06	1.6869e-06	1.9625e-06	5.4863e-07	6.1389e-06	2.8195e-06	0
400.802	3.048e-06	5.1593e-06	6.0358e-07	6.9746e-07	3.3574e-06	1.7198e-06	2.0278e-06	2.6325e-06	1.4214e-06	1.6082e-06	2.6571e-06	1.7746e-06	3.7164e-06	5.128e-07	0
401.802	5.1967e-06	4.2425e-07	1.7508e-06	1.9758e-06	2.8615e-06	1.5348e-06	2.2808e-06	1.4518e-06	2.449e-06	2.1344e-06	2.0764e-06	2.0573e-06	4.5657e-06	1.2841e-06	0
402.801	2.9657e-06	7.6365e-07	3.4336e-06	1.8562e-06	2.5293e-06	2.6971e-06	1.1483e-06	5.7263e-07	2.003e-06	7.2219e-07	7.528e-07	8.1988e-07	3.029e-06	2.7577e-06	0
403.801	6.8684e-07	5.8493e-07	2.1067e-06	7.4028e-07	4.2183e-06	2.5022e-06	1.4271e-06	1.1282e-06	1.3726e-06	2.6139e-06	1.552e-06	1.5955e-06	3.3507e-06	8.1525e-07	0
404.8	1.262e-06	7.7659e-07	1.4791e-06	2.8447e-06	1.492e-06	1.9044e-06	1.8473e-06	4.1682e-06	1.3488e-06	2.0043e-06	3.234e-06	2.0849e-06	3.0801e-06	4.5888e-06	0
405.8	8.3571e-06	4.63e-07	2.9932e-06	2.1706e-06	3.4068e-06	3.4925e-06	2.2012e-07	2.4491e-06	1.0242e-06	1.9879e-06	5.3554e-07	4.6784e-07	1.0775e-06	2.7023e-06	0
406.799	1.1189e-06	2.304e-06	1.447e-06	1.3258e-06	2.4093e-06	1.357e-06	2.767e-07	5.125e-07	3.1528e-06	2.329e-06	1.9725e-06	1.37e-06	1.5966e-06	2.2446e-06	0
407.799	5.956e-07	1.645e-06	4.7125e-07	1.2776e-06	1.5208e-06	3.3986e-06	8.0393e-07	4.648e-07	2.2831e-06	2.9142e-06	2.0012e-06	2.2882e-06	2.2636e-06	3.2117e-06	0
408.798	1.3434e-06	1.2029e-06	1.6548e-06	2.6841e-06	1.5499e-06	1.0453e-06	2.448e-06	1.5503e-06	2.3515e-06	3.2364e-06	1.86e-06	1.4025e-06	3.9386e-06	9.4161e-07	0
409.798	3.4352e-06	1.0083e-06	1.2602e-06	1.1419e-06	1.6045e-06	8.8719e-08	1.949e-06	1.7532e-06	1.8711e-06	1.079e-06	1.3706e-06	1.0024e-07	2.7947e-06	9.7374e-07	0
410.797	3.78e-06	1.4213e-06	3.2234e-06	2.18e-06	1.6817e-06	3.3678e-06	4.6834e-07	1.488e-06	2.5288e-06	2.0984e-06	2.3469e-06	2.2218e-06	6.5894e-06	2.3264e-06	0
411.797	4.9847e-06	1.8102e-06	9.8078e-07	8.7658e-07	2.6432e-07	1.4952e-06	3.0915e-06	1.8156e-06	2.2552e-06	3.3265e-06	1.7296e-06	1.9714e-06	3.7943e-06	1.5847e-06	0
412.796	4.7363e-06	2.6954e-07	1.6808e-06	2.3113e-06	1.8349e-06	2.3739e-06	1.5012e-06	2.4276e-06	2.5756e-06	1.9163e-06	1.6313e-06	2.8036e-06	2.5193e-06	1.2284e-06	0
413.796	6.5752e-06	2.6711e-06	2.5887e-06	1.186e-06	4.9797e-06	6.9274e-07	3.0744e-06	2.9095e-06	3.6087e-06	9.3397e-07	2.9289e-06	9.5921e-07	2.7115e-06	3.2876e-06	0
414.795	8.6213e-06	4.9205e-07	1.6816e-06	6.8485e-07	3.2716e-06	1.2005e-06	1.7195e-06	5.4745e-07	6.6362e-07	2.7276e-06	4.342e-07	2.0735e-06	2.88e-06	5.5055e-07	0
415.795	1.8965e-06	3.5878e-06	8.6154e-07	1.7023e-06	5.3271e-06	1.4199e-06	1.9288e-06	3.7142e-06	8.2919e-07	3.142e-06	1.5856e-06	2.2351e-06	1.4341e-06	1.99e-06	0
416.794	4.0875e-06	1.8141e-06	3.0468e-06	1.1734e-06	2.3693e-06	2.7354e-06	1.5528e-06	1.8011e-06	2.9402e-06	3.1443e-06	9.0194e-07	3.8399e-07	3.0492e-06	3.3833e-06	0
417.794	4.8037e-06	2.1777e-06	1.633e-06	1.0427e-06	1.8336e-06	1.8809e-06	1.9639e-06	1.2372e-06	1.3537e-06	1.7967e-06	2.8309e-06	8.638e-07	4.0897e-06	2.0938e-06	0
418.793	4.3934e-06	2.6602e-06	3.4028e-06	3.0581e-06	3.9763e-06	1.2436e-06	2.0764e-06	1.9502e-06	1.5184e-06	1.3648e-07	1.0787e-06	1.5928e-06	5.1118e-06	9.7697e-07	0
419.793	3.1271e-06	2.903e-06	1.807e-06	1.1116e-06	1.8954e-06	1.7798e-06	9.3671e-07	2.2641e-06	2.4489e-06	8.3075e-07	1.6719e-06	1.3805e-06	3.8875e-06	1.7693e-06	0
420.792	3.1868e-06	1.3498e-06	2.4033e-06	2.4912e-06	2.2146e-06	3.3444e-06	2.9663e-06	1.4203e-06	2.4256e-06	1.7595e-06	2.3472e-06	1.6708e-06	5.1865e-06	2.7148e-06	0
421.792	4.1482e-06	9.446e-07	1.8507e-06	2.3675e-06	3.6825e-06	9.7419e-07	4.0347e-06	1.8653e-06	1.3743e-06	1.1447e-06	2.8373e-06	2.1953e-06	4.4354e-06	2.5731e-06	0
422.791	2.1457e-06	3.4211e-06	7.4936e-07	1.2674e-06	8.855e-07	1.3328e-06	1.3481e-06	1.5988e-06	6.5754e-07	1.9864e-06	3.0593e-06	3.1025e-06	3.9398e-06	9.3426e-07	0
423.791	1.2777e-06	2.1514e-06	2.1215e-06	1.588e-06	1.4287e-06	1.4614e-06	4.2256e-07	2.2122e-06	9.706e-07	1.317e-06	1.527e-06	2.2803e-06	2.0676e-06	4.0826e-07	0
424.79	3.2846e-06	1.778e-06	1.7911e-06	1.139e-06	2.8871e-06	2.7052e-06	5.0839e-07	1.2941e-06	1.6694e-06	3.5124e-06	2.4017e-06	1.3852e-06	2.0524e-06	2.4549e-06	0
425.79	4.1e-06	2.678e-06	1.7481e-06	3.361e-06	2.4234e-06	1.3505e-06	1.6867e-06	9.5606e-07	3.9434e-06	1.2992e-06	2.3755e-06	7.6773e-07	2.8151e-06	2.9214e-06	0
426.789	1.9395e-06	3.1559e-06	1.3025e-06	1.44e-06	4.4894e-06	3.6949e-07	1.8527e-06	1.1688e-06	1.6331e-06	1.3956e-06	8.2073e-07	1.2531e-06	3.4159e-06	3.0024e-06	0
427.789	5.0881e-06	3.8527e-06	1.1548e-06	2.124e-06	2.0852e-06	2.1703e-06	1.535e-06	1.3294e-06	1.8756e-06	3.0311e-06	7.8717e-07	5.8899e-07	5.2559e-06	2.3929e-06	0
428.788	1.2123e-06	5.314e-07	3.1861e-06	2.2876e-06	3.1896e-06	1.7544e-06	1.0646e-06	1.2891e-06	7.9867e-07	8.3604e-07	1.7541e-06	2.1911e-06	3.5929e-06	3.1176e-06	0
429.788	1.5331e-06	2.9026e-06	8.9365e-07	1.4233e-06	2.9802e-06	3.8868e-06	8.121e-07	1.5394e-06	1.918e-06	1.9935e-06	1.302e-06	2.8992e-06	2.501e-06	1.0574e-06	0
430.787	4.9589e-07	3.3593e-06	2.0767e-06	9.7209e-07	3.0227e-06	2.7998e-06	2.3966e-06	2.0631e-06	2.4572e-06	1.8794e-06	1.5027e-06	2.1759e-06	3.421e-06	1.572e-06	0
431.787	2.1814e-06	5.3388e-07	2.0509e-06	6.182e-07	1.8721e-06	8.6132e-07	2.2703e-06	1.505e-06	1.7473e-06	2.565e-06	1.8174e-06	1.8033e-06	1.5162e-06	2.2317e-06	0
432.786	2.8862e-06	1.5779e-06	2.6512e-06	1.624e-06	3.8887e-06	9.8645e-07	2.1002e-06	1.4588e-06	1.3621e-06	1.5945e-06	6.9723e-07	2.2515e-06	1.5353e-06	1.3877e-06	0
433.786	1.9856e-06	4.0941e-06	3.6188e-07	1.853e-06	3.2998e-06	6.5653e-07	8.9764e-07	2.2717e-06	1.4981e-06	2.0523e-06	2.5168e-07	5.2719e-07	3.9111e-06	7.0825e-07	0
434.785	2.2222e-06	2.0552e-06	2.2771e-06	1.612e-06	1.4159e-06	5.4338e-07	2.7859e-06	9.9638e-07	5.1279e-07	1.1449e-06	3.723e-06	6.9832e-07	2.6736e-06	3.8873e-06	0
435.785	6.9381e-06	2.9241e-06	1.0552e-06	1.462e-06	4.4048e-06	3.9028e-07	2.3511e-06	1.6558e-06	1.2069e-06	1.5909e-06	3.1845e-06	2.2691e-06	3.919e-06	1.1088e-06	0
436.784	3.3978e-06	2.3493e-06	1.0098e-06	1.7343e-06	2.7624e-06	1.7648e-06	2.4939e-06	1.0026e-06	1.7008e-06	2.5327e-06	2.9873e-06	1.9413e-06	6.4202e-06	2.705e-06	0
437.784	1.7382e-06	1.4399e-06	5.8823e-07	2.8007e-06	2.0913e-06	4.3763e-07	1.4313e-06	6.6244e-07	1.5233e-06	1.0162e-06	7.7357e-08	1.4627e-06	2.5257e-06	1.071e-06	0
438.783	2.5289e-06	3.4169e-06	1.6003e-06	1.3622e-06	2.8381e-06	1.4576e-06	6.3883e-07	1.2706e-07	1.3685e-06	1.1713e-06	2.1239e-06	1.79e-06	2.8758e-06	6.1344e-07	0
439.783	1.0289e-06	9.587e-07	1.7126e-06	1.8553e-06	1.6952e-06	8.2815e-07	1.4069e-06	1.052e-06	1.7443e-06	1.46e-06	2.0323e-06	2.3379e-06	4.0131e-06	3.5497e-06	0
440.782	4.4795e-06	5.6597e-07	2.6042e-06	2.8613e-06	2.5154e-06	1.2357e-06	1.5721e-06	2.2489e-07	2.4859e-06	1.2158e-06	8.8999e-07	7.5506e-07	1.9005e-06	3.746e-06	0
441.782	1.6376e-06	1.753e-06	4.221e-06	2.0773e-06	2.2857e-06	1.0828e-06	1.6429e-06	2.087e-06	3.8746e-06	1.619e-06	2.9077e-06	1.9624e-06	3.2886e-06	1.2312e-06	0
442.781	1.344e-06	3.0222e-06	1.2761e-06	6.1722e-06	1.1708e-06	1.8513e-06	1.7866e-06	1.2377e-06	3.3868e-06	2.7721e-06	2.3908e-06	2.0771e-06	3.284e-06	1.3988e-06	0
443.781	2.5616e-06	2.2733e-06	7.3121e-07	4.0313e-06	3.9647e-06	2.8523e-06	2.2673e-07	1.7494e-06	1.802e-06	2.4526e-06	1.6127e-06	2.1768e-06	4.1333e-06	2.5907e-07	0
444.78	1.9055e-06	1.3847e-06	1.4454e-06	2.0554e-06	1.6894e-06	2.5865e-06	5.3417e-07	1.7165e-06	2.6889e-06	2.1039e-06	2.1082e-06	1.9506e-06	5.0297e-06	1.6526e-06	0
445.78	2.3549e-06	3.1222e-06	3.4764e-06	2.7517e-06	3.6342e-06	7.7636e-07	2.354e-06	4.1387e-06	2.5438e-06	1.1313e-06	3.1282e-06	2.8927e-06	4.387e-06	1.1964e-06	0
446.779	1.5593e-06	1.5865e-06	2.1599e-06	1.6901e-06	9.4863e-07	2.1725e-06	1.7427e-06	6.2827e-07	3.0317e-06	1.7948e-06	3.0908e-06	1.7495e-06	9.0395e-07	2.0502e-06	0
447.779	1.6569e-06	5.8726e-07	1.9475e-06	9.7224e-07	3.7615e-06	1.9563e-06	1.5266e-06	6.2274e-07	2.705e-06	2.0993e-06	1.8632e-06	1.3083e-06	5.1937e-06	1.1908e-06	0
448.778	8.0461e-07	3.0471e-07	2.5243e-06	1.2518e-06	1.3428e-06	1.0176e-06	1.3597e-06	8.0265e-07	1.2194e-06	9.6807e-07	2.4894e-06	2.0468e-07	4.9234e-06	1.0867e-06	0
449.778	3.3565e-06	1.0992e-06	1.3642e-06	3.5936e-06	5.131e-06	1.8587e-06	2.4353e-06	3.1583e-07	2.5856e-06	1.066e-06	2.7237e-06	1.2256e-06	2.8076e-06	2.2778e-06	0
450.777	2.9559e-06	1.3006e-06	1.503e-06	1.2957e-06	1.612e-06	1.3209e-06	9.8652e-07	1.0507e-06	1.4226e-06	2.1143e-06	4.082e-07	5.6867e-07	3.1476e-06	1.4065e-06	0
451.777	2.2378e-06	1.0959e-06	1.0334e-06	2.1495e-06	1.9927e-06	1.8391e-06	4.8533e-07	2.977e-06	6.9204e-07	3.8496e-07	6.7599e-07	1.7573e-06	4.0024e-06	6.2562e-07	0
452.776	3.9891e-06	2.0256e-06	1.8566e-06	7.1979e-07	3.0087e-06	1.2304e-06	1.5716e-06	5.0311e-07	1.1724e-06	3.2388e-06	5.0521e-06	1.9768e-06	3.6254e-06	1.5596e-06	0
453.776	4.3059e-06	4.1189e-06	3.3304e-06	9.1303e-07	2.1857e-06	2.7359e-06	1.7558e-06	9.9012e-07	1.6499e-06	2.1245e-06	1.1065e-06	5.4293e-07	2.5731e-06	2.8458e-06	0
454.775	5.1143e-06	3.5981e-07	1.5113e-06	9.4124e-07	1.5197e-06	1.3452e-06	1.1462e-06	2.6386e-07	1.6711e-06	2.5894e-06	1.7486e-06	1.291e-06	3.0186e-06	1.4906e-06	0
455.775	3.8886e-06	8.6752e-07	2.5693e-06	2.6164e-06	3.7921e-06	2.0542e-06	8.0351e-07	3.0618e-07	3.5377e-08	1.7111e-06	2.1377e-06	2.8952e-06	3.5506e-06	2.9691e-06	0
456.774	2.9027e-06	1.8678e-06	1.2024e-06	1.3149e-06	8.4689e-07	3.8189e-07	4.7318e-07	1.0823e-06	1.7281e-06	1.3098e-06	6.2758e-07	1.177e-06	4.4511e-06	3.0398e-06	0
457.774	2.2945e-06	4.1207e-07	4.6005e-07	8.0733e-07	3.7988e-06	1.2787e-06	1.5207e-06	1.9671e-06	9.5868e-07	6.9707e-07	1.3887e-06	1.7591e-06	3.2039e-06	2.1282e-06	0
458.773	1.5242e-06	2.5039e-06	7.1074e-07	1.9721e-06	1.1643e-06	1.471e-06	1.3887e-06	6.523e-07	1.9578e-06	1.4626e-06	3.9071e-07	1.3913e-06	2.0456e-06	1.1199e-06	0
459.773	2.4936e-06	6.0363e-07	9.4575e-07	6.8415e-08	2.0967e-06	3.5765e-07	3.2074e-06	4.9997e-07	2.8672e-06	1.9324e-06	2.0298e-06	8.1299e-07	3.4012e-06	9.3784e-07	0
460.772	4.2032e-06	1.5523e-06	3.5311e-06	2.0002e-06	2.6999e-06	1.6271e-06	1.9799e-06	1.2791e-06	7.908e-07	1.1706e-06	1.8875e-07	6.1702e-07	2.1785e-06	2.8924e-06	0
461.772	5.1235e-06	1.1252e-06	7.3199e-07	7.4642e-07	1.8082e-06	1.7806e-06	1.4195e-06	8.7876e-07	1.7307e-06	1.4922e-06	2.3352e-06	6.1491e-07	2.6919e-06	1.2996e-06	0
462.771	1.6793e-06	1.3559e-06	1.4227e-06	1.227e-06	1.115e-06	1.1324e-06	1.5134e-06	1.3228e-06	6.6071e-07	2.6215e-06	3.0559e-06	2.5397e-06	4.279e-06	1.3496e-06	0
463.771	1.1775e-06	1.779e-06	1.0506e-06	1.2736e-06	2.2773e-06	3.4883e-06	2.2904e-06	2.0011e-06	1.9118e-06	3.0991e-06	3.1198e-06	2.3377e-06	2.771e-06	2.258e-07	0
464.77	5.032e-06	1.9933e-06	4.4052e-07	2.1994e-06	2.7799e-06	3.4682e-06	1.6652e-07	1.3026e-06	1.2308e-06	2.4876e-06	2.2743e-06	1.7728e-06	2.7295e-06	1.3464e-06	0
465.77	6.7641e-07	4.3074e-06	2.6871e-06	1.0091e-06	1.0094e-06	1.8742e-06	2.6239e-06	1.0993e-06	3.9011e-06	2.6124e-06	9.9043e-07	9.7994e-07	3.9733e-06	1.7535e-06	0
466.769	2.157e-06	2.2447e-06	2.4237e-06	2.6208e-07	4.2538e-06	2.4991e-06	1.4195e-06	1.1622e-06	2.2422e-07	1.6585e-06	1.1896e-06	9.479e-07	3.8633e-06	2.0485e-06	0
467.769	3.2977e-06	7.392e-07	1.6937e-06	3.7078e-06	3.4607e-06	4.0008e-07	2.4904e-06	2.1276e-06	1.899e-06	1.2e-06	4.2039e-06	1.0337e-06	2.3681e-06	1.3168e-06	0
468.768	2.9428e-06	1.5525e-06	1.6755e-06	1.8713e-06	2.7975e-06	1.216e-06	8.0917e-07	4.1377e-07	1.9723e-06	1.3373e-06	1.3602e-06	7.6152e-07	3.4042e-06	3.0795e-07	0
469.768	1.4373e-06	2.1429e-06	1.2471e-06	1.3121e-06	3.9387e-06	1.0877e-06	1.145e-06	2.3552e-06	2.1242e-06	1.9697e-06	1.5666e-06	2.8836e-06	2.8578e-06	2.8354e-07	0
470.767	1.2264e-06	2.2787e-07	1.4334e-06	1.7743e-06	1.9283e-06	7.4262e-07	5.9372e-07	4.283e-07	2.061e-06	7.6578e-07	5.0572e-07	2.4449e-06	2.3147e-06	2.338e-06	0
471.767	2.4503e-06	1.7505e-06	7.9025e-07	8.1487e-07	2.075e-06	2.5576e-06	2.0433e-06	1.0758e-06	8.292e-07	2.0151e-06	1.269e-06	1.4986e-06	2.4553e-06	9.8721e-07	0
472.766	2.5901e-06	9.2628e-07	2.0043e-06	1.8802e-06	2.9665e-06	1.6825e-06	2.1935e-06	2.2377e-06	1.8478e-06	9.7853e-07	1.3823e-06	9.1958e-07	3.6682e-06	1.3835e-06	0
473.766	4.0307e-06	2.1921e-06	1.2426e-06	1.7729e-06	4.4699e-06	1.9475e-06	2.7596e-06	1.856e-06	1.5394e-06	2.0116e-06	3.2433e-06	1.823e-06	3.2943e-06	2.461e-06	0
474.765	3.2754e-06	4.619e-06	1.3622e-06	3.5918e-06	2.4008e-06	1.9385e-06	9.1619e-07	2.6341e-06	3.2655e-06	1.012e-06	2.0234e-06	1.2492e-06	3.0084e-06	1.7108e-06	0
475.765	4.6207e-06	9.5215e-07	1.3677e-06	1.7062e-06	3.861e-07	7.2362e-07	5.2695e-07	1.2284e-06	2.2005e-06	2.1582e-06	4.1561e-06	8.3476e-07	3.4922e-06	1.7468e-06	0
476.764	2.9119e-06	6.0121e-07	7.803e-07	2.4004e-06	5.4579e-07	6.6853e-07	9.0354e-07	1.1855e-06	7.2243e-07	1.272e-06	7.8939e-07	1.3164e-06	3.1018e-06	1.7096e-06	0
477.764	3.6037e-06	1.4104e-06	1.7496e-06	1.8362e-06	3.8202e-06	1.2551e-06	1.9258e-06	4.8733e-07	2.3496e-06	1.4133e-06	1.1309e-06	1.357e-06	2.14e-06	2.262e-06	0
478.763	3.6537e-06	8.7074e-07	2.1973e-06	1.6707e-06	3.4332e-06	1.0992e-06	1.4126e-06	2.5278e-06	1.2151e-06	1.733e-06	7.0462e-07	1.6543e-06	3.6027e-06	1.1333e-06	0
479.763	1.6514e-06	1.1734e-06	1.3524e-06	1.2076e-06	2.8063e-06	1.4683e-06	9.3643e-07	2.0273e-06	2.3165e-06	1.8982e-06	1.0181e-06	2.3906e-06	1.4274e-06	1.6781e-06	0
480.762	5.1967e-06	9.6088e-07	2.392e-06	1.0141e-06	1.1247e-06	7.7983e-07	7.022e-07	7.6924e-07	1.6916e-07	1.1698e-06	1.8501e-06	1.6645e-06	2.1276e-06	1.2213e-06	0
481.762	1.2581e-06	5.664e-07	1.1028e-06	1.7051e-06	1.438e-06	4.395e-06	1.4659e-06	2.1267e-06	1.329e-06	1.357e-06	1.2623e-06	1.578e-06	4.4015e-06	7.2792e-07	0
482.762	4.2993e-06	2.9929e-06	2.0875e-06	1.6464e-06	1.3354e-06	1.2975e-06	1.3959e-06	1.2586e-06	1.999e-06	1.2864e-06	2.2075e-06	6.7933e-07	4.5326e-06	1.0149e-06	0
483.761	2.418e-06	1.2039e-06	1.5777e-06	3.3667e-06	1.5487e-06	7.849e-07	5.7966e-07	1.744e-06	1.4619e-06	2.2428e-06	1.4085e-06	1.9955e-06	3.5947e-06	1.4295e-06	0
484.761	2.6276e-06	2.299e-06	4.7428e-07	2.8065e-07	1.8014e-06	1.8518e-06	1.2511e-06	1.5203e-06	7.7471e-07	1.5832e-06	3.241e-06	1.4315e-06	4.2298e-06	8.2498e-07	0
485.76	2.6136e-06	1.7801e-06	1.8696e-06	1.2566e-06	5.2989e-07	4.4818e-07	7.7754e-07	3.6069e-07	1.1164e-06	2.4639e-06	1.9218e-06	1.2188e-06	3.9326e-06	2.1166e-06	0
486.76	1.5872e-06	2.3347e-06	2.2293e-06	1.3443e-06	2.5157e-07	1.8358e-06	1.3675e-06	1.3094e-06	1.854e-06	2.3776e-06	2.3381e-06	2.3435e-06	2.8769e-06	3.3452e-06	0
487.759	3.9901e-06	1.4109e-06	9.3621e-07	2.0318e-06	2.1186e-06	5.4615e-07	6.9741e-07	1.5366e-06	1.7224e-06	1.3553e-06	3.8321e-06	3.2096e-07	5.6393e-06	1.549e-06	0
488.759	3.4103e-06	1.3081e-06	5.9204e-07	4.624e-07	2.9569e-06	3.6859e-07	7.9907e-07	9.0112e-07	1.4173e-06	1.5712e-06	1.8933e-06	8.6842e-07	3.9399e-06	1.3572e-06	0
489.758	1.6884e-06	6.3274e-07	1.5608e-06	3.3333e-06	1.2868e-06	1.9346e-06	1.8132e-06	1.0128e-06	3.7847e-07	2.5038e-06	3.3356e-06	2.4004e-06	2.9039e-06	9.1357e-07	0
490.758	2.4261e-06	2.6544e-06	1.5409e-06	1.4913e-06	2.2802e-06	9.5528e-07	6.0375e-07	1.9216e-06	2.5362e-06	1.9503e-06	8.298e-07	1.2715e-06	2.746e-06	2.8193e-06	0
491.757	1.3377e-06	1.7766e-06	7.758e-07	1.0699e-06	1.6423e-06	1.0156e-06	1.795e-06	2.1799e-06	5.3803e-07	3.7144e-06	8.2007e-07	1.3808e-06	3.2276e-06	1.4006e-06	0
492.757	1.9952e-06	1.7453e-06	2.7819e-06	2.7657e-06	2.829e-06	1.4461e-06	1.7598e-06	1.3973e-06	1.3633e-06	2.4033e-06	1.1844e-06	1.6121e-06	4.2037e-06	2.254e-06	0
493.756	4.5488e-06	2.3003e-06	7.7896e-07	5.587e-07	1.9734e-06	3.4348e-06	1.195e-06	1.1822e-06	1.334e-06	9.4727e-07	6.2093e-07	7.2526e-07	3.4254e-06	5.9922e-07	0
494.756	3.2702e-06	2.0109e-06	2.1381e-06	4.3411e-06	3.531e-06	8.5511e-07	4.9434e-07	3.2157e-06	1.3814e-06	7.7924e-07	3.7043e-07	7.708e-07	4.4739e-06	2.679e-06	0
495.755	1.8119e-06	1.0426e-06	1.4041e-06	9.885e-07	3.6551e-06	1.4567e-06	1.3083e-06	2.1752e-06	1.714e-06	8.4441e-07	2.0959e-06	1.1826e-06	3.8364e-06	2.2425e-07	0
496.755	2.8961e-06	7.0517e-07	1.2824e-06	1.6163e-06	2.6159e-06	2.4957e-07	1.8511e-06	1.2449e-06	1.2283e-06	5.3747e-07	1.6563e-06	1.7663e-06	3.2198e-06	2.3513e-06	0
497.754	3.4329e-06	1.6272e-06	6.6478e-07	2.2629e-06	3.1625e-06	1.9775e-06	9.6141e-07	1.3877e-06	5.6216e-07	9.816e-07	2.5584e-06	2.3303e-06	4.0788e-06	6.6971e-07	0
498.754	3.3959e-06	2.9175e-07	3.1283e-06	2.9708e-07	1.7713e-06	1.4634e-06	1.6139e-06	8.6875e-07	1.15e-06	2.9646e-06	2.5773e-06	1.8422e-06	1.3365e-06	1.2627e-06	0
499.753	4.0916e-06	2.0501e-06	1.5239e-06	4.0745e-07	3.4327e-06	1.519e-06	1.0431e-06	7.5309e-07	2.0963e-06	9.3988e-07	1.1217e-06	1.1475e-06	3.3398e-06	1.988e-06	0
500.753	2.8204e-06	6.2489e-07	8.8782e-07	1.6469e-06	1.9846e-06	2.6344e-07	1.4767e-06	6.9113e-07	2.0875e-06	7.2282e-07	5.5814e-07	9.8239e-07	3.1516e-06	1.3882e-06	0
501.752	2.4201e-06	3.4781e-06	2.5541e-06	1.8267e-06	1.1411e-06	9.741e-07	3.5153e-07	4.3081e-07	3.6383e-07	6.1902e-07	1.1333e-06	2.2348e-06	3.4134e-06	1.9133e-06	0
502.752	4.3256e-06	1.3619e-06	7.9757e-07	1.5396e-06	5.2764e-07	1.1906e-06	2.6851e-06	7.6175e-07	2.6167e-06	1.9209e-06	3.74e-07	1.1159e-06	1.8814e-06	6.8468e-07	0
503.751	3.5051e-06	3.474e-06	1.0405e-06	7.1895e-07	2.2644e-06	1.6267e-06	6.7956e-07	9.5731e-07	4.0208e-06	2.4389e-06	1.4243e-06	9.4245e-07	2.9069e-06	1.1333e-06	0
504.751	1.5627e-06	9.7816e-07	1.5118e-06	2.3938e-06	2.6341e-06	5.226e-07	7.0189e-07	5.8742e-07	6.8095e-07	1.0377e-06	1.6003e-06	1.0967e-06	3.3794e-06	1.1211e-06	0
505.75	1.1275e-06	3.8384e-06	1.5695e-06	4.2066e-07	2.4377e-06	4.3956e-06	1.5803e-06	1.0047e-06	1.4035e-06	8.0297e-07	1.3987e-06	1.6986e-06	2.1014e-06	5.8998e-07	0
506.75	1.9524e-06	4.7869e-07	1.4079e-06	1.2762e-06	2.6328e-06	1.0714e-06	7.5538e-07	2.8458e-06	1.6131e-06	1.7748e-06	4.6205e-07	2.4963e-07	2.821e-06	2.3012e-06	0
507.749	2.7846e-06	1.7582e-06	1.0243e-06	3.5174e-06	1.6393e-06	1.1688e-06	1.4879e-06	6.9413e-07	1.8996e-06	1.3442e-06	1.9988e-06	2.2669e-06	2.595e-06	5.0723e-07	0
508.749	5.1629e-06	1.3659e-06	1.2287e-06	7.4382e-07	3.4664e-06	3.6247e-06	3.5308e-07	1.9364e-06	2.091e-06	2.1416e-06	2.7219e-06	9.0598e-07	1.6799e-06	1.703e-06	0
509.748	2.5308e-06	1.4492e-06	2.4258e-06	2.7651e-06	3.6726e-06	3.3809e-06	7.0699e-07	6.1579e-07	2.762e-06	1.7299e-06	8.2822e-07	1.4378e-06	3.6019e-06	2.6314e-06	0
510.748	2.3786e-06	4.0418e-06	2.2339e-06	2.0335e-06	2.7457e-06	1.2494e-06	5.9735e-07	2.8203e-07	1.0956e-06	1.551e-06	1.5061e-06	1.3928e-06	4.0002e-06	1.3613e-06	0
511.747	3.3175e-06	1.7488e-06	7.1049e-07	4.6483e-07	6.0144e-07	1.0463e-06	1.3903e-06	2.2522e-06	1.9125e-06	1.7073e-06	7.1038e-07	1.6037e-06	2.5569e-06	3.9354e-07	0
512.747	2.3786e-06	4.0418e-06	2.2339e-06	2.0335e-06	2.7457e-06	1.2494e-06	5.9735e-07	2.8203e-07	1.0956e-06	1.551e-06	1.5061e-06	1.3928e-06	4.0002e-06	1.3613e-06	0
513.746	2.5308e-06	1.4492e-06	2.4258e-06	2.7651e-06	3.6726e-06	3.3809e-06	7.0699e-07	6.1579e-07	2.762e-06	1.7299e-06	8.2822e-07	1.4378e-06	3.6019e-06	2.6314e-06	0
514.746	5.1629e-06	1.3659e-06	1.2287e-06	7.4382e-07	3.4664e-06	3.6247e-06	3.5308e-07	1.9364e-06	2.091e-06	2.1416e-06	2.7219e-06	9.0598e-07	1.6799e-06	1.703e-06	0
515.745	2.7846e-06	1.7582e-06	1.0243e-06	3.5174e-06	1.6393e-06	1.1688e-06	1.4879e-06	6.9413e-07	1.8996e-06	1.3442e-06	1.9988e-06	2.2669e-06	2.595e-06	5.0723e-07	0
516.745	1.9524e-06	4.7869e-07	1.4079e-06	1.2762e-06	2.6328e-06	1.0714e-06	7.5538e-07	2.8458e-06	1.6131e-06	1.7748e-06	4.6205e-07	2.4963e-07	2.821e-06	2.3012e-06	0
517.744	1.1275e-06	3.8384e-06	1.5695e-06	4.2066e-07	2.4377e-06	4.3956e-06	1.5803e-06	1.0047e-06	1.4035e-06	8.0297e-07	1.3987e-06	1.6986e-06	2.1014e-06	5.8998e-07	0
518.744	1.5627e-06	9.7816e-07	1.5118e-06	2.3938e-06	2.6341e-06	5.226e-07	7.0189e-07	5.8742e-07	6.8095e-07	1.0377e-06	1.6003e-06	1.0967e-06	3.3794e-06	1.1211e-06	0
519.743	3.5051e-06	3.474e-06	1.0405e-06	7.1895e-07	2.2644e-06	1.6267e-06	6.7956e-07	9.5731e-07	4.0208e-06	2.4389e-06	1.4243e-06	9.4245e-07	2.9069e-06	1.1333e-06	0
520.743	4.3256e-06	1.3619e-06	7.9757e-07	1.5396e-06	5.2764e-07	1.1906e-06	2.6851e-06	7.6175e-07	2.6167e-06	1.9209e-06	3.74e-07	1.1159e-06	1.8814e-06	6.8468e-07	0
521.742	2.4201e-06	3.4781e-06	2.5541e-06	1.8267e-06	1.1411e-06	9.741e-07	3.5153e-07	4.3081e-07	3.6383e-07	6.1902e-07	1.1333e-06	2.2348e-06	3.4134e-06	1.9133e-06	0
522.742	2.8204e-06	6.2489e-07	8.8782e-07	1.6469e-06	1.9846e-06	2.6344e-07	1.4767e-06	6.9113e-07	2.0875e-06	7.2282e-07	5.5814e-07	9.8239e-07	3.1516e-06	1.3882e-06	0
523.741	4.0916e-06	2.0501e-06	1.5239e-06	4.0745e-07	3.4327e-06	1.519e-06	1.0431e-06	7.5309e-07	2.0963e-06	9.3988e-07	1.1217e-06	1.1475e-06	3.3398e-06	1.988e-06	0
524.741	3.3959e-06	2.9175e-07	3.1283e-06	2.9708e-07	1.7713e-06	1.4634e-06	1.6139e-06	8.6875e-07	1.15e-06	2.9646e-06	2.5773e-06	1.8422e-06	1.3365e-06	1.2627e-06	0
525.74	3.4329e-06	1.6272e-06	6.6478e-07	2.2629e-06	3.1625e-06	1.9775e-06	9.6141e-07	1.3877e-06	5.6216e-07	9.816e-07	2.5584e-06	2.3303e-06	4.0788e-06	6.6971e-07	0
526.74	2.8961e-06	7.0517e-07	1.2824e-06	1.6163e-06	2.6159e-06	2.4957e-07	1.8511e-06	1.2449e-06	1.2283e-06	5.3747e-07	1.6563e-06	1.7663e-06	3.2198e-06	2.3513e-06	0
527.739	1.8119e-06	1.0426e-06	1.4041e-06	9.885e-07	3.6551e-06	1.4567e-06	1.3083e-06	2.1752e-06	1.714e-06	8.4441e-07	2.0959e-06	1.1826e-06	3.8364e-06	2.2425e-07	0
528.739	3.2702e-06	2.0109e-06	2.1381e-06	4.3411e-06	3.531e-06	8.5511e-07	4.9434e-07	3.2157e-06	1.3814e-06	7.7924e-07	3.7043e-07	7.708e-07	4.4739e-06	2.679e-06	0
529.738	4.5488e-06	2.3003e-06	7.7896e-07	5.587e-07	1.9734e-06	3.4348e-06	1.195e-06	1.1822e-06	1.334e-06	9.4727e-07	6.2093e-07	7.2526e-07	3.4254e-06	5.9922e-07	0
530.738	1.9952e-06	1.7453e-06	2.7819e-06	2.7657e-06	2.829e-06	1.4461e-06	1.7598e-06	1.3973e-06	1.3633e-06	2.4033e-06	1.1844e-06	1.6121e-06	4.2037e-06	2.254e-06	0
531.737	1.3377e-06	1.7766e-06	7.758e-07	1.0699e-06	1.6423e-06	1.0156e-06	1.795e-06	2.1799e-06	5.3803e-07	3.7144e-06	8.2007e-07	1.3808e-06	3.2276e-06	1.4006e-06	0
532.737	2.4261e-06	2.6544e-06	1.5409e-06	1.4913e-06	2.2802e-06	9.5528e-07	6.0375e-07	1.9216e-06	2.5362e-06	1.9503e-06	8.298e-07	1.2715e-06	2.746e-06	2.8193e-06	0
533.736	1.6884e-06	6.3274e-07	1.5608e-06	3.3333e-06	1.2868e-06	1.9346e-06	1.8132e-06	1.0128e-06	3.7847e-07	2.5038e-06	3.3356e-06	2.4004e-06	2.9039e-06	9.1357e-07	0
534.736	3.4103e-06	1.3081e-06	5.9204e-07	4.624e-07	2.9569e-06	3.6859e-07	7.9907e-07	9.0112e-07	1.4173e-06	1.5712e-06	1.8933e-06	8.6842e-07	3.9399e-06	1.3572e-06	0
535.735	3.9901e-06	1.4109e-06	9.3621e-07	2.0318e-06	2.1186e-06	5.4615e-07	6.9741e-07	1.5366e-06	1.7224e-06	1.3553e-06	3.8321e-06	3.2096e-07	5.6393e-06	1.549e-06	0
536.735	1.5872e-06	2.3347e-06	2.2293e-06	1.3443e-06	2.5157e-07	1.8358e-06	1.3675e-06	1.3094e-06	1.854e-06	2.3776e-06	2.3381e-06	2.3435e-06	2.8769e-06	3.3452e-06	0
537.734	2.6136e-06	1.7801e-06	1.8696e-06	1.2566e-06	5.2989e-07	4.4818e-07	7.7754e-07	3.6069e-07	1.1164e-06	2.4639e-06	1.9218e-06	1.2188e-06	3.9326e-06	2.1166e-06	0
538.734	2.6276e-06	2.299e-06	4.7428e-07	2.8065e-07	1.8014e-06	1.8518e-06	1.2511e-06	1.5203e-06	7.7471e-07	1.5832e-06	3.241e-06	1.4315e-06	4.2298e-06	8.2498e-07	0
539.733	2.418e-06	1.2039e-06	1.5777e-06	3.3667e-06	1.5487e-06	7.849e-07	5.7966e-07	1.744e-06	1.4619e-06	2.2428e-06	1.4085e-06	1.9955e-06	3.5947e-06	1.4295e-06	0
540.733	4.2993e-06	2.9929e-06	2.0875e-06	1.6464e-06	1.3354e-06	1.2975e-06	1.3959e-06	1.2586e-06	1.999e-06	1.2864e-06	2.2075e-06	6.7933e-07	4.5326e-06	1.0149e-06	0
541.732	1.2581e-06	5.664e-07	1.1028e-06	1.7051e-06	1.438e-06	4.395e-06	1.4659e-06	2.1267e-06	1.329e-06	1.357e-06	1.2623e-06	1.578e-06	4.4015e-06	7.2792e-07	0
542.732	5.1967e-06	9.6088e-07	2.392e-06	1.0141e-06	1.1247e-06	7.7983e-07	7.022e-07	7.6924e-07	1.6916e-07	1.1698e-06	1.8501e-06	1.6645e-06	2.1276e-06	1.2213e-06	0
543.731	1.6514e-06	1.1734e-06	1.3524e-06	1.2076e-06	2.8063e-06	1.4683e-06	9.3643e-07	2.0273e-06	2.3165e-06	1.8982e-06	1.0181e-06	2.3906e-06	1.4274e-06	1.6781e-06	0
544.731	3.6537e-06	8.7074e-07	2.1973e-06	1.6707e-06	3.4332e-06	1.0992e-06	1.4126e-06	2.5278e-06	1.2151e-06	1.733e-06	7.0462e-07	1.6543e-06	3.6027e-06	1.1333e-06	0
545.73	3.6037e-06	1.4104e-06	1.7496e-06	1.8362e-06	3.8202e-06	1.2551e-06	1.9258e-06	4.8733e-07	2.3496e-06	1.4133e-06	1.1309e-06	1.357e-06	2.14e-06	2.262e-06	0
546.73	2.9119e-06	6.0121e-07	7.803e-07	2.4004e-06	5.4579e-07	6.6853e-07	9.0354e-07	1.1855e-06	7.2243e-07	1.272e-06	7.8939e-07	1.3164e-06	3.1018e-06	1.7096e-06	0
547.729	4.6207e-06	9.5215e-07	1.3677e-06	1.7062e-06	3.861e-07	7.2362e-07	5.2695e-07	1.2284e-06	2.2005e-06	2.1582e-06	4.1561e-06	8.3476e-07	3.4922e-06	1.7468e-06	0
548.729	3.2754e-06	4.619e-06	1.3622e-06	3.5918e-06	2.4008e-06	1.9385e-06	9.1619e-07	2.6341e-06	3.2655e-06	1.012e-06	2.0234e-06	1.2492e-06	3.0084e-06	1.7108e-06	0
549.728	4.0307e-06	2.1921e-06	1.2426e-06	1.7729e-06	4.4699e-06	1.9475e-06	2.7596e-06	1.856e-06	1.5394e-06	2.0116e-06	3.2433e-06	1.823e-06	3.2943e-06	2.461e-06	0
550.728	2.5901e-06	9.2628e-07	2.0043e-06	1.8802e-06	2.9665e-06	1.6825e-06	2.1935e-06	2.2377e-06	1.8478e-06	9.7853e-07	1.3823e-06	9.1958e-07	3.6682e-06	1.3835e-06	0
551.727	2.4503e-06	1.7505e-06	7.9025e-07	8.1487e-07	2.075e-06	2.5576e-06	2.0433e-06	1.0758e-06	8.292e-07	2.0151e-06	1.269e-06	1.4986e-06	2.4553e-06	9.8721e-07	0
552.727	1.2264e-06	2.2787e-07	1.4334e-06	1.7743e-06	1.9283e-06	7.4262e-07	5.9372e-07	4.283e-07	2.061e-06	7.6578e-07	5.0572e-07	2.4449e-06	2.3147e-06	2.338e-06	0
553.726	1.4373e-06	2.1429e-06	1.2471e-06	1.3121e-06	3.9387e-06	1.0877e-06	1.145e-06	2.3552e-06	2.1242e-06	1.9697e-06	1.5666e-06	2.8836e-06	2.8578e-06	2.8354e-07	0
554.726	2.9428e-06	1.5525e-06	1.6755e-06	1.8713e-06	2.7975e-06	1.216e-06	8.0917e-07	4.1377e-07	1.9723e-06	1.3373e-06	1.3602e-06	7.6152e-07	3.4042e-06	3.0795e-07	0
555.725	3.2977e-06	7.392e-07	1.6937e-06	3.7078e-06	3.4607e-06	4.0008e-07	2.4904e-06	2.1276e-06	1.899e-06	1.2e-06	4.2039e-06	1.0337e-06	2.3681e-06	1.3168e-06	0
556.725	2.157e-06	2.2447e-06	2.4237e-06	2.6208e-07	4.2538e-06	2.4991e-06	1.4195e-06	1.1622e-06	2.2422e-07	1.6585e-06	1.1896e-06	9.479e-07	3.8633e-06	2.0485e-06	0
557.724	6.7641e-07	4.3074e-06	2.6871e-06	1.0091e-06	1.0094e-06	1.8742e-06	2.6239e-06	1.0993e-06	3.9011e-06	2.6124e-06	9.9043e-07	9.7994e-07	3.9733e-06	1.7535e-06	0
558.724	5.032e-06	1.9933e-06	4.4052e-07	2.1994e-06	2.7799e-06	3.4682e-06	1.6652e-07	1.3026e-06	1.2308e-06	2.4876e-06	2.2743e-06	1.7728e-06	2.7295e-06	1.3464e-06	0
559.723	1.1775e-06	1.779e-06	1.0506e-06	1.2736e-06	2.2773e-06	3.4883e-06	2.2904e-06	2.0011e-06	1.9118e-06	3.0991e-06	3.1198e-06	2.3377e-06	2.771e-06	2.258e-07	0
560.723	1.6793e-06	1.3559e-06	1.4227e-06	1.227e-06	1.115e-06	1.1324e-06	1.5134e-06	1.3228e-06	6.6071e-07	2.6215e-06	3.0559e-06	2.5397e-06	4.279e-06	1.3496e-06	0
561.723	5.1235e-06	1.1252e-06	7.3199e-07	7.4642e-07	1.8082e-06	1.7806e-06	1.4195e-06	8.7876e-07	1.7307e-06	1.4922e-06	2.3352e-06	6.1491e-07	2.6919e-06	1.2996e-06	0
562.722	4.2032e-06	1.5523e-06	3.5311e-06	2.0002e-06	2.6999e-06	1.6271e-06	1.9799e-06	1.2791e-06	7.908e-07	1.1706e-06	1.8875e-07	6.1702e-07	2.1785e-06	2.8924e-06	0
563.722	2.4936e-06	6.0363e-07	9.4575e-07	6.8415e-08	2.0967e-06	3.5765e-07	3.2074e-06	4.9997e-07	2.8672e-06	1.9324e-06	2.0298e-06	8.1299e-07	3.4012e-06	9.3784e-07	0
564.721	1.5242e-06	2.5039e-06	7.1074e-07	1.9721e-06	1.1643e-06	1.471e-06	1.3887e-06	6.523e-07	1.9578e-06	1.4626e-06	3.9071e-07	1.3913e-06	2.0456e-06	1.1199e-06	0
565.721	2.2945e-06	4.1207e-07	4.6005e-07	8.0733e-07	3.7988e-06	1.2787e-06	1.5207e-06	1.9671e-06	9.5868e-07	6.9707e-07	1.3887e-06	1.7591e-06	3.2039e-06	2.1282e-06	0
566.72	2.9027e-06	1.8678e-06	1.2024e-06	1.3149e-06	8.4689e-07	3.8189e-07	4.7318e-07	1.0823e-06	1.7281e-06	1.3098e-06	6.2758e-07	1.177e-06	4.4511e-06	3.0398e-06	0
567.72	3.8886e-06	8.6752e-07	2.5693e-06	2.6164e-06	3.7921e-06	2.0542e-06	8.0351e-07	3.0618e-07	3.5377e-08	1.7111e-06	2.1377e-06	2.8952e-06	3.5506e-06	2.9691e-06	0
568.719	5.1143e-06	3.5981e-07	1.5113e-06	9.4124e-07	1.5197e-06	1.3452e-06	1.1462e-06	2.6386e-07	1.6711e-06	2.5894e-06	1.7486e-06	1.291e-06	3.0186e-06	1.4906e-06	0
569.719	4.3059e-06	4.1189e-06	3.3304e-06	9.1303e-07	2.1857e-06	2.7359e-06	1.7558e-06	9.9012e-07	1.6499e-06	2.1245e-06	1.1065e-06	5.4293e-07	2.5731e-06	2.8458e-06	0
570.718	3.9891e-06	2.0256e-06	1.8566e-06	7.1979e-07	3.0087e-06	1.2304e-06	1.5716e-06	5.0311e-07	1.1724e-06	3.2388e-06	5.0521e-06	1.9768e-06	3.6254e-06	1.5596e-06	0
571.718	2.2378e-06	1.0959e-06	1.0334e-06	2.1495e-06	1.9927e-06	1.8391e-06	4.8533e-07	2.977e-06	6.9204e-07	3.8496e-07	6.7599e-07	1.7573e-06	4.0024e-06	6.2562e-07	0
572.717	2.9559e-06	1.3006e-06	1.503e-06	1.2957e-06	1.612e-06	1.3209e-06	9.8652e-07	1.0507e-06	1.4226e-06	2.1143e-06	4.082e-07	5.6867e-07	3.1476e-06	1.4065e-06	0
573.717	3.3565e-06	1.0992e-06	1.3642e-06	3.5936e-06	5.131e-06	1.8587e-06	2.4353e-06	3.1583e-07	2.5856e-06	1.066e-06	2.7237e-06	1.2256e-06	2.8076e-06	2.2778e-06	0
574.716	8.0461e-07	3.0471e-07	2.5243e-06	1.2518e-06	1.3428e-06	1.0176e-06	1.3597e-06	8.0265e-07	1.2194e-06	9.6807e-07	2.4894e-06	2.0468e-07	4.9234e-06	1.0867e-06	0
575.716	1.6569e-06	5.8726e-07	1.9475e-06	9.7224e-07	3.7615e-06	1.9563e-06	1.5266e-06	6.2274e-07	2.705e-06	2.0993e-06	1.8632e-06	1.3083e-06	5.1937e-06	1.1908e-06	0
576.715	1.5593e-06	1.5865e-06	2.1599e-06	1.6901e-06	9.4863e-07	2.1725e-06	1.7427e-06	6.2827e-07	3.0317e-06	1.7948e-06	3.0908e-06	1.7495e-06	9.0395e-07	2.0502e-06	0
577.715	2.3549e-06	3.1222e-06	3.4764e-06	2.7517e-06	3.6342e-06	7.7636e-07	2.354e-06	4.1387e-06	2.5438e-06	1.1313e-06	3.1282e-06	2.8927e-06	4.387e-06	1.1964e-06	0
578.714	1.9055e-06	1.3847e-06	1.4454e-06	2.0554e-06	1.6894e-06	2.5865e-06	5.3417e-07	1.7165e-06	2.6889e-06	2.1039e-06	2.1082e-06	1.9506e-06	5.0297e-06	1.6526e-06	0
579.714	2.5616e-06	2.2733e-06	7.3121e-07	4.0313e-06	3.9647e-06	2.8523e-06	2.2673e-07	1.7494e-06	1.802e-06	2.4526e-06	1.6127e-06	2.1768e-06	4.1333e-06	2.5907e-07	0
580.713	1.344e-06	3.0222e-06	1.2761e-06	6.1722e-06	1.1708e-06	1.8513e-06	1.7866e-06	1.2377e-06	3.3868e-06	2.7721e-06	2.3908e-06	2.0771e-06	3.284e-06	1.3988e-06	0
581.713	1.6376e-06	1.753e-06	4.221e-06	2.0773e-06	2.2857e-06	1.0828e-06	1.6429e-06	2.087e-06	3.8746e-06	1.619e-06	2.9077e-06	1.9624e-06	3.2886e-06	1.2312e-06	0
582.712	4.4795e-06	5.6597e-07	2.6042e-06	2.8613e-06	2.5154e-06	1.2357e-06	1.5721e-06	2.2489e-07	2.4859e-06	1.2158e-06	8.8999e-07	7.5506e-07	1.9005e-06	3.746e-06	0
583.712	1.0289e-06	9.587e-07	1.7126e-06	1.8553e-06	1.6952e-06	8.2815e-07	1.4069e-06	1.052e-06	1.7443e-06	1.46e-06	2.0323e-06	2.3379e-06	4.0131e-06	3.5497e-06	0
584.711	2.5289e-06	3.4169e-06	1.6003e-06	1.3622e-06	2.8381e-06	1.4576e-06	6.3883e-07	1.2706e-07	1.3685e-06	1.1713e-06	2.1239e-06	1.79e-06	2.8758e-06	6.1344e-07	0
585.711	1.7382e-06	1.4399e-06	5.8823e-07	2.8007e-06	2.0913e-06	4.3763e-07	1.4313e-06	6.6244e-07	1.5233e-06	1.0162e-06	7.7357e-08	1.4627e-06	2.5257e-06	1.071e-06	0
586.71	3.3978e-06	2.3493e-06	1.0098e-06	1.7343e-06	2.7624e-06	1.7648e-06	2.4939e-06	1.0026e-06	1.7008e-06	2.5327e-06	2.9873e-06	1.9413e-06	6.4202e-06	2.705e-06	0
587.71	6.9381e-06	2.9241e-06	1.0552e-06	1.462e-06	4.4048e-06	3.9028e-07	2.3511e-06	1.6558e-06	1.2069e-06	1.5909e-06	3.1845e-06	2.2691e-06	3.919e-06	1.1088e-06	0
588.709	2.2222e-06	2.0552e-06	2.2771e-06	1.612e-06	1.4159e-06	5.4338e-07	2.7859e-06	9.9638e-07	5.1279e-07	1.1449e-06	3.723e-06	6.9832e-07	2.6736e-06	3.8873e-06	0
589.709	1.9856e-06	4.0941e-06	3.6188e-07	1.853e-06	3.2998e-06	6.5653e-07	8.9764e-07	2.2717e-06	1.4981e-06	2.0523e-06	2.5168e-07	5.2719e-07	3.9111e-06	7.0825e-07	0
590.708	2.8862e-06	1.5779e-06	2.6512e-06	1.624e-06	3.8887e-06	9.8645e-07	2.1002e-06	1.4588e-06	1.3621e-06	1.5945e-06	6.9723e-07	2.2515e-06	1.5353e-06	1.3877e-06	0
591.708	2.1814e-06	5.3388e-07	2.0509e-06	6.182e-07	1.8721e-06	8.6132e-07	2.2703e-06	1.505e-06	1.7473e-06	2.565e-06	1.8174e-06	1.8033e-06	1.5162e-06	2.2317e-06	0
592.707	4.9589e-07	3.3593e-06	2.0767e-06	9.7209e-07	3.0227e-06	2.7998e-06	2.3966e-06	2.0631e-06	2.4572e-06	1.8794e-06	1.5027e-06	2.1759e-06	3.421e-06	1.572e-06	0
593.707	1.5331e-06	2.9026e-06	8.9365e-07	1.4233e-06	2.9802e-06	3.8868e-06	8.121e-07	1.5394e-06	1.918e-06	1.9935e-06	1.302e-06	2.8992e-06	2.501e-06	1.0574e-06	0
594.706	1.2123e-06	5.314e-07	3.1861e-06	2.2876e-06	3.1896e-06	1.7544e-06	1.0646e-06	1.2891e-06	7.9867e-07	8.3604e-07	1.7541e-06	2.1911e-06	3.5929e-06	3.1176e-06	0
595.706	5.0881e-06	3.8527e-06	1.1548e-06	2.124e-06	2.0852e-06	2.1703e-06	1.535e-06	1.3294e-06	1.8756e-06	3.0311e-06	7.8717e-07	5.8899e-07	5.2559e-06	2.3929e-06	0
596.705	1.9395e-06	3.1559e-06	1.3025e-06	1.44e-06	4.4894e-06	3.6949e-07	1.8527e-06	1.1688e-06	1.6331e-06	1.3956e-06	8.2073e-07	1.2531e-06	3.4159e-06	3.0024e-06	0
597.705	4.1e-06	2.678e-06	1.7481e-06	3.361e-06	2.4234e-06	1.3505e-06	1.6867e-06	9.5606e-07	3.9434e-06	1.2992e-06	2.3755e-06	7.6773e-07	2.8151e-06	2.9214e-06	0
598.704	3.2846e-06	1.778e-06	1.7911e-06	1.139e-06	2.8871e-06	2.7052e-06	5.0839e-07	1.2941e-06	1.6694e-06	3.5124e-06	2.4017e-06	1.3852e-06	2.0524e-06	2.4549e-06	0
599.704	1.2777e-06	2.1514e-06	2.1215e-06	1.588e-06	1.4287e-06	1.4614e-06	4.2256e-07	2.2122e-06	9.706e-07	1.317e-06	1.527e-06	2.2803e-06	2.0676e-06	4.0826e-07	0
600.703	2.1457e-06	3.4211e-06	7.4936e-07	1.2674e-06	8.855e-07	1.3328e-06	1.3481e-06	1.5988e-06	6.5754e-07	1.9864e-06	3.0593e-06	3.1025e-06	3.9398e-06	9.3426e-07	0
601.703	4.1482e-06	9.446e-07	1.8507e-06	2.3675e-06	3.6825e-06	9.7419e-07	4.0347e-06	1.8653e-06	1.3743e-06	1.1447e-06	2.8373e-06	2.1953e-06	4.4354e-06	2.5731e-06	0
602.702	3.1868e-06	1.3498e-06	2.4033e-06	2.4912e-06	2.2146e-06	3.3444e-06	2.9663e-06	1.4203e-06	2.4256e-06	1.7595e-06	2.3472e-06	1.6708e-06	5.1865e-06	2.7148e-06	0
603.702	3.1271e-06	2.903e-06	1.807e-06	1.1116e-06	1.8954e-06	1.7798e-06	9.3671e-07	2.2641e-06	2.4489e-06	8.3075e-07	1.6719e-06	1.3805e-06	3.8875e-06	1.7693e-06	0
604.701	4.3934e-06	2.6602e-06	3.4028e-06	3.0581e-06	3.9763e-06	1.2436e-06	2.0764e-06	1.9502e-06	1.5184e-06	1.3648e-07	1.0787e-06	1.5928e-06	5.1118e-06	9.7697e-07	0
605.701	4.8037e-06	2.1777e-06	1.633e-06	1.0427e-06	1.8336e-06	1.8809e-06	1.9639e-06	1.2372e-06	1.3537e-06	1.7967e-06	2.8309e-06	8.638e-07	4.0897e-06	2.0938e-06	0
606.7	4.0875e-06	1.8141e-06	3.0468e-06	1.1734e-06	2.3693e-06	2.7354e-06	1.5528e-06	1.8011e-06	2.9402e-06	3.1443e-06	9.0194e-07	3.8399e-07	3.0492e-06	3.3833e-06	0
607.7	1.8965e-06	3.5878e-06	8.6154e-07	1.7023e-06	5.3271e-06	1.4199e-06	1.9288e-06	3.7142e-06	8.2919e-07	3.142e-06	1.5856e-06	2.2351e-06	1.4341e-06	1.99e-06	0
608.699	8.6213e-06	4.9205e-07	1.6816e-06	6.8485e-07	3.2716e-06	1.2005e-06	1.7195e-06	5.4745e-07	6.6362e-07	2.7276e-06	4.342e-07	2.0735e-06	2.88e-06	5.5055e-07	0
609.699	6.5752e-06	2.6711e-06	2.5887e-06	1.186e-06	4.9797e-06	6.9274e-07	3.0744e-06	2.9095e-06	3.6087e-06	9.3397e-07	2.9289e-06	9.5921e-07	2.7115e-06	3.2876e-06	0
610.698	4.7363e-06	2.6954e-07	1.6808e-06	2.3113e-06	1.8349e-06	2.3739e-06	1.5012e-06	2.4276e-06	2.5756e-06	1.9163e-06	1.6313e-06	2.8036e-06	2.5193e-06	1.2284e-06	0
611.698	4.9847e-06	1.8102e-06	9.8078e-07	8.7658e-07	2.6432e-07	1.4952e-06	3.0915e-06	1.8156e-06	2.2552e-06	3.3265e-06	1.7296e-06	1.9714e-06	3.7943e-06	1.5847e-06	0
612.697	3.78e-06	1.4213e-06	3.2234e-06	2.18e-06	1.6817e-06	3.3678e-06	4.6834e-07	1.488e-06	2.5288e-06	2.0984e-06	2.3469e-06	2.2218e-06	6.5894e-06	2.3264e-06	0
613.697	3.4352e-06	1.0083e-06	1.2602e-06	1.1419e-06	1.6045e-06	8.8719e-08	1.949e-06	1.7532e-06	1.8711e-06	1.079e-06	1.3706e-06	1.0024e-07	2.7947e-06	9.7374e-07	0
614.696	1.3434e-06	1.2029e-06	1.6548e-06	2.6841e-06	1.5499e-06	1.0453e-06	2.448e-06	1.5503e-06	2.3515e-06	3.2364e-06	1.86e-06	1.4025e-06	3.9386e-06	9.4161e-07	0
615.696	5.956e-07	1.645e-06	4.7125e-07	1.2776e-06	1.5208e-06	3.3986e-06	8.0393e-07	4.648e-07	2.2831e-06	2.9142e-06	2.0012e-06	2.2882e-06	2.2636e-06	3.2117e-06	0
616.695	1.1189e-06	2.304e-06	1.447e-06	1.3258e-06	2.4093e-06	1.357e-06	2.767e-07	5.125e-07	3.1528e-06	2.329e-06	1.9725e-06	1.37e-06	1.5966e-06	2.2446e-06	0
617.695	8.3571e-06	4.63e-07	2.9932e-06	2.1706e-06	3.4068e-06	3.4925e-06	2.2012e-07	2.4491e-06	1.0242e-06	1.9879e-06	5.3554e-07	4.6784e-07	1.0775e-06	2.7023e-06	0
618.694	1.262e-06	7.7659e-07	1.4791e-06	2.8447e-06	1.492e-06	1.9044e-06	1.8473e-06	4.1682e-06	1.3488e-06	2.0043e-06	3.234e-06	2.0849e-06	3.0801e-06	4.5888e-06	0
619.694	6.8684e-07	5.8493e-07	2.1067e-06	7.4028e-07	4.2183e-06	2.5022e-06	1.4271e-06	1.1282e-06	1.3726e-06	2.6139e-06	1.552e-06	1.5955e-06	3.3507e-06	8.1525e-07	0
620.693	2.9657e-06	7.6365e-07	3.4336e-06	1.8562e-06	2.5293e-06	2.6971e-06	1.1483e-06	5.7263e-07	2.003e-06	7.2219e-07	7.528e-07	8.1988e-07	3.029e-06	2.7577e-06	0
621.693	5.1967e-06	4.2425e-07	1.7508e-06	1.9758e-06	2.8615e-06	1.5348e-06	2.2808e-06	1.4518e-06	2.449e-06	2.1344e-06	2.0764e-06	2.0573e-06	4.5657e-06	1.2841e-06	0
622.692	3.048e-06	5.1593e-06	6.0358e-07	6.9746e-07	3.3574e-06	1.7198e-06	2.0278e-06	2.6325e-06	1.4214e-06	1.6082e-06	2.6571e-06	1.7746e-06	3.7164e-06	5.128e-07	0
623.692	3.9338e-06	3.2912e-06	3.0773e-06	1.5872e-06	9.7888e-07	1.1792e-06	9.0929e-07	1.4156e-06	3.3851e-06	1.6869e-06	1.9625e-06	5.4863e-07	6.1389e-06	2.8195e-06	0
624.691	1.5204e-06	1.9614e-06	1.3476e-06	2.1062e-06	3.2801e-06	2.7921e-06	8.2153e-07	9.1784e-07	1.2247e-06	2.0194e-06	1.1968e-06	1.5199e-06	6.2613e-06	1.7674e-06	0
625.691	3.1387e-06	1.7994e-07	3.0778e-06	3.0094e-06	5.0498e-06	3.3343e-06	9.5312e-07	2.8853e-06	1.2775e-06	2.2237e-06	2.0584e-06	2.5438e-06	5.1243e-06	1.951e-06	0
626.69	1.8694e-06	1.5561e-06	7.9273e-07	2.0003e-06	1.4181e-06	6.1048e-07	7.4833e-07	1.9415e-06	8.8639e-07	1.0092e-06	1.8768e-06	2.6573e-06	4.2535e-06	2.0959e-06	0
627.69	4.4344e-06	2.6338e-06	2.3145e-07	1.2496e-06	4.2949e-06	1.629e-06	2.2457e-06	2.8776e-06	3.2968e-06	1.4872e-06	5.152e-07	3.0258e-06	4.0361e-06	1.2502e-06	0
628.689	1.8669e-06	4.1856e-06	2.1976e-06	1.5172e-06	3.8385e-06	3.4556e-06	4.1189e-06	2.9252e-06	2.7831e-07	2.0668e-06	2.3304e-06	3.5754e-06	4.57e-06	3.0303e-06	0
629.689	3.6519e-06	2.4059e-06	3.2784e-06	4.2751e-06	2.4127e-06	1.6408e-06	4.3488e-07	2.0082e-06	1.2518e-06	2.0181e-06	1.6277e-06	1.5395e-06	4.4315e-06	7.8838e-07	0
630.688	3.6633e-06	1.5173e-06	5.5182e-07	3.001e-06	9.7958e-07	2.0968e-06	3.9774e-07	2.5788e-06	5.5922e-07	2.0649e-06	2.0512e-06	2.1472e-06	2.871e-06	1.242e-06	0
631.688	3.2393e-06	4.4347e-06	8.4509e-07	2.0717e-06	3.2508e-06	3.4072e-06	2.7253e-06	1.5287e-06	1.1633e-06	1.4237e-06	2.1379e-06	1.162e-06	4.0325e-06	1.9303e-06	0
632.687	6.1181e-06	2.1237e-06	9.4782e-07	2.602e-06	2.6515e-06	1.3836e-06	8.4301e-07	1.4352e-06	3.6934e-06	1.4648e-06	1.2739e-06	8.4507e-07	5.0063e-06	1.4488e-06	0
633.687	2.2809e-06	2.3187e-06	2.0417e-06	2.1667e-06	2.773e-06	2.0027e-07	2.7928e-06	1.0415e-06	2.035e-06	6.4186e-07	3.4177e-06	2.7976e-06	2.1472e-06	2.9844e-06	0
634.686	2.3535e-06	5.1017e-06	1.4779e-06	2.0418e-06	2.4078e-06	1.4879e-06	1.1037e-06	1.5082e-06	2.783e-06	4.9287e-07	6.0776e-07	1.4034e-06	5.4703e-06	1.6444e-06	0
635.686	4.0288e-06	3.0546e-06	3.4453e-06	1.8496e-06	4.3596e-06	9.0872e-07	2.893e-06	2.7012e-06	2.3147e-06	2.7287e-06	1.4132e-06	2.9739e-06	3.0803e-06	1.3664e-06	0
636.685	3.5802e-06	1.0808e-06	2.6131e-06	1.9354e-06	3.9105e-06	2.0252e-06	4.7922e-08	6.5488e-07	4.8549e-06	3.972e-06	2.572e-06	2.9229e-06	3.1435e-06	1.4218e-06	0
637.685	5.4703e-06	2.5404e-06	1.3176e-06	3.9202e-06	4.113e-06	1.0314e-06	7.4053e-07	2.9067e-06	1.0155e-06	1.3688e-06	2.1194e-06	4.4775e-06	3.2223e-06	1.8263e-06	0
638.684	7.8011e-06	4.0997e-06	3.1845e-06	3.0297e-06	7.7706e-06	1.9821e-06	1.6202e-06	6.624e-07	1.5728e-06	5.5997e-06	3.9913e-06	9.4181e-07	2.6514e-06	3.0564e-06	0
639.684	5.0157e-06	2.3823e-06	1.8972e-06	2.8744e-06	3.331e-06	2.2088e-06	1.9941e-06	2.7128e-06	2.2671e-06	4.5839e-06	2.038e-06	1.6647e-06	1.7229e-06	1.7751e-06	0
640.683	1.2315e-06	3.2195e-06	2.5001e-06	8.6855e-07	3.4044e-06	2.6458e-06	6.7768e-07	2.2027e-06	1.7248e-06	5.2058e-06	2.4131e-06	6.5017e-07	3.2771e-06	4.2864e-07	0
641.683	4.4508e-07	1.8936e-06	3.3092e-06	2.9621e-06	1.517e-06	1.9654e-06	1.2914e-06	1.7518e-06	2.2697e-06	1.5002e-06	3.2053e-06	3.9738e-06	4.0375e-06	1.126e-06	0
642.683	5.5821e-06	4.3829e-06	1.432e-06	5.0507e-06	6.7649e-06	1.6075e-06	2.3013e-06	2.223e-07	8.4681e-07	9.9542e-07	1.943e-06	9.74e-07	2.9109e-06	5.6065e-06	0
643.682	3.5399e-06	1.6919e-06	1.1265e-06	3.719e-06	9.874e-07	1.7261e-06	3.1629e-06	2.6294e-06	2.7541e-06	1.7998e-06	7.4355e-07	7.6458e-07	3.8864e-06	2.0986e-06	0
644.682	6.8655e-06	2.1158e-06	2.9348e-06	3.6826e-06	1.5015e-06	2.0559e-06	1.2972e-06	1.3036e-06	2.4205e-06	4.2598e-06	2.4599e-06	2.3593e-06	2.3843e-06	3.3325e-06	0
645.681	6.3305e-06	1.6703e-06	2.9093e-06	2.7225e-06	2.0062e-06	3.4584e-06	2.4805e-06	5.6528e-06	1.8673e-06	3.2487e-06	4.8719e-06	9.0456e-07	2.8167e-06	1.6351e-06	0
646.681	6.2793e-06	4.9317e-06	2.6831e-06	9.2904e-07	5.9341e-06	2.3326e-06	2.9957e-06	1.2164e-06	1.9481e-06	2.7083e-06	2.0213e-06	3.2144e-06	2.1214e-06	2.119e-06	0
647.68	3.8376e-06	4.4494e-06	1.4397e-06	3.0597e-06	2.8171e-06	2.7114e-06	1.205e-06	6.7795e-07	1.5408e-06	3.276e-06	1.5448e-06	1.8251e-06	4.0518e-06	2.3377e-06	0
648.68	2.4981e-06	4.2244e-06	3.7856e-06	2.7584e-06	2.2443e-06	1.8732e-06	1.5073e-06	2.7113e-06	2.6716e-06	2.4874e-06	3.4887e-06	1.3332e-06	2.4956e-06	1.4294e-06	0
649.679	2.2754e-06	1.4919e-06	2.1021e-06	1.3426e-06	2.9146e-06	1.4487e-06	2.0393e-06	6.0384e-07	2.8842e-06	2.3364e-06	3.2471e-06	1.3552e-06	3.137e-06	9.5883e-08	0
650.679	3.7336e-06	1.5932e-06	4.2917e-07	2.6173e-06	3.7612e-06	2.4177e-06	2.3602e-06	1.718e-06	1.7519e-06	1.9984e-06	3.4273e-06	1.3489e-06	3.895e-06	3.1408e-06	0
651.678	4.9361e-06	2.6299e-06	2.1002e-06	1.1308e-06	2.9056e-06	1.7977e-06	2.7799e-06	9.5526e-07	1.7858e-06	5.4286e-06	2.9759e-06	8.3599e-07	4.2627e-06	1.4887e-06	0
652.678	1.9708e-06	2.7596e-06	2.7091e-06	4.8035e-06	1.7174e-06	7.1282e-07	5.8224e-07	1.9349e-06	1.6844e-06	6.7019e-07	1.4646e-06	2.0893e-06	2.2374e-06	1.6263e-06	0
653.677	4.1602e-06	1.3261e-06	2.4003e-06	4.9464e-06	3.3303e-06	2.5731e-06	4.6308e-06	2.1153e-06	2.3393e-06	1.3878e-06	3.2879e-06	3.1459e-06	5.3161e-06	2.9041e-06	0
654.677	4.6553e-07	3.7783e-06	7.6943e-07	2.9947e-06	2.9366e-07	3.0296e-06	3.1815e-06	1.0081e-06	1.6551e-06	1.1088e-06	6.7496e-06	1.963e-06	2.8524e-06	5.4174e-06	0
655.676	3.9484e-06	6.9733e-07	3.0746e-06	2.8891e-06	2.5557e-06	1.9112e-06	4.3604e-06	1.2208e-06	3.6161e-06	3.8729e-06	4.0509e-07	2.0279e-06	5.0135e-06	2.54e-07	0
656.676	3.2185e-06	1.6093e-06	2.0029e-06	5.3289e-07	4.2469e-06	3.5722e-06	2.9386e-06	1.1566e-06	2.2436e-07	2.1345e-06	2.9124e-06	3.4202e-06	3.8519e-06	3.0907e-06	0
657.675	5.4822e-06	2.5837e-06	2.2171e-06	2.0828e-06	5.4193e-06	1.2809e-06	1.0907e-06	2.8349e-06	2.2196e-06	9.9325e-07	1.7897e-06	2.3442e-06	4.9434e-06	2.5599e-06	0
658.675	5.3068e-06	3.0301e-06	5.1939e-06	4.3781e-06	2.2115e-06	3.1883e-06	8.0302e-07	1.0899e-06	4.321e-06	2.397e-06	1.0742e-06	8.132e-07	3.7544e-06	2.3348e-06	0
659.674	9.0687e-06	9.7163e-07	4.3569e-06	4.094e-06	2.7382e-06	3.313e-06	3.5824e-06	5.0015e-07	1.412e-06	1.8112e-06	3.0487e-06	2.3119e-06	3.3494e-06	1.9423e-06	0
660.674	2.3999e-06	2.9459e-06	4.2804e-07	3.9356e-06	5.2672e-06	3.4538e-06	1.0957e-06	2.7518e-06	2.1031e-06	2.3668e-06	1.9535e-06	3.2789e-06	4.1293e-06	2.6264e-07	0
661.673	4.7709e-06	9.7976e-07	3.1526e-06	4.2627e-07	1.7315e-06	3.1072e-06	6.2044e-07	1.9337e-06	1.7787e-06	3.1903e-06	1.9701e-06	7.9473e-07	3.3304e-06	3.2238e-06	0
662.673	5.7106e-07	2.5e-06	2.1841e-06	4.652e-06	3.5883e-06	3.7391e-06	2.6722e-06	1.9816e-06	3.1213e-06	3.9932e-06	9.9386e-07	2.8242e-06	4.8963e-06	3.5061e-06	0
663.672	4.015e-07	1.3274e-06	2.6641e-06	3.1883e-06	2.5107e-06	1.9907e-06	1.0353e-06	3.0113e-06	2.9507e-06	1.4318e-06	1.4223e-06	2.5731e-06	2.8688e-06	6.7204e-07	0
664.672	4.1424e-06	1.3391e-06	3.3707e-06	2.6911e-06	2.6793e-06	1.4533e-06	1.0091e-06	3.5706e-06	2.7222e-06	8.8138e-07	2.6231e-06	1.606e-06	2.3804e-06	1.0902e-06	0
665.671	3.0075e-06	2.7635e-06	4.1352e-06	3.9594e-06	5.8672e-06	5.1761e-06	8.2916e-07	2.2732e-06	2.2087e-06	4.6069e-06	4.9586e-06	1.2819e-06	6.298e-06	4.5485e-06	0
666.671	1.8098e-06	4.9843e-06	3.3322e-06	5.4502e-06	2.7154e-06	9.7541e-07	2.0128e-06	2.2959e-06	2.3923e-06	2.3308e-06	1.0837e-06	9.4531e-07	2.6523e-06	1.0711e-06	0
667.67	5.2433e-06	4.3177e-06	2.5342e-06	2.5462e-06	9.805e-07	2.5237e-06	2.1507e-06	2.5279e-06	3.9855e-07	1.4322e-06	1.6496e-06	3.6154e-06	4.0168e-06	1.847e-06	0
668.67	2.1945e-06	1.5465e-06	2.8072e-06	6.0024e-06	6.2742e-06	9.1584e-07	1.412e-06	2.0032e-06	1.188e-06	6.2484e-06	2.724e-06	1.3814e-06	2.5223e-06	2.0652e-06	0
669.669	2.4506e-06	2.1475e-06	3.6958e-06	1.3139e-06	2.8556e-06	2.7541e-06	7.736e-07	1.8178e-06	1.4146e-06	1.8865e-06	2.6239e-06	7.595e-07	3.7725e-06	2.2696e-06	0
670.669	4.5251e-06	1.1688e-06	5.7259e-06	5.6427e-06	1.1779e-06	6.6755e-07	1.2006e-06	2.4485e-06	3.674e-06	4.6761e-06	2.3483e-06	3.2092e-06	3.0825e-06	1.1623e-06	0
671.668	4.772e-06	4.9071e-06	3.06e-06	3.48e-06	8.345e-07	3.9323e-06	2.679e-06	2.4823e-06	3.3468e-06	3.3678e-06	7.8781e-06	3.7536e-06	2.6515e-06	1.8712e-06	0
672.668	4.9725e-06	2.406e-06	2.059e-06	1.8345e-06	4.2425e-06	1.8443e-06	2.683e-06	4.0578e-06	1.3648e-06	6.8683e-07	6.9263e-07	1.4496e-06	3.8453e-06	8.3333e-07	0
673.667	5.8418e-06	4.2944e-06	3.0882e-06	1.2066e-06	2.4847e-06	2.365e-06	2.4775e-06	8.565e-07	1.6851e-06	2.6237e-06	4.0999e-06	1.1793e-06	3.6008e-06	3.5877e-06	0
674.667	4.4452e-06	4.2674e-06	3.2329e-06	2.3582e-06	1.7448e-06	4.8106e-06	1.7088e-06	1.0326e-06	3.8112e-06	4.5116e-06	2.4905e-06	2.7818e-06	1.6669e-06	2.1966e-06	0
675.666	6.9129e-06	2.6322e-06	2.9457e-06	1.3379e-06	1.6657e-06	1.2414e-06	1.7174e-06	1.8202e-06	2.8401e-06	1.8523e-06	3.8437e-06	5.832e-07	1.1274e-06	1.8079e-06	0
676.666	5.7667e-06	2.0229e-06	2.0566e-06	6.5692e-06	4.6682e-06	2.5549e-06	3.8196e-06	4.5618e-06	3.9087e-07	4.5036e-06	1.5421e-06	3.6153e-06	3.6105e-06	1.7026e-06	0
677.665	1.9771e-06	2.2732e-06	2.0178e-06	1.4902e-06	3.9509e-06	3.4676e-06	2.262e-06	1.8837e-06	1.5505e-06	3.8841e-06	3.7003e-06	3.0781e-06	5.5376e-06	7.322e-06	0
678.665	2.5757e-06	4.4062e-06	9.0792e-07	1.1012e-06	5.0735e-06	4.1281e-06	4.2382e-06	9.4691e-07	2.0882e-06	4.0634e-06	2.472e-07	3.5485e-06	2.7156e-06	2.2459e-06	0
679.664	1.9964e-06	4.7782e-06	2.2359e-06	2.6526e-06	3.1441e-06	2.424e-06	3.8288e-06	2.1167e-06	2.7821e-06	2.5674e-06	2.2677e-06	8.0542e-07	9.3875e-07	4.2399e-06	0
680.664	7.5004e-06	2.6418e-06	3.0798e-06	3.4299e-06	4.1041e-06	2.9498e-06	1.723e-06	2.2274e-06	5.6513e-06	2.5549e-06	2.5122e-06	3.1922e-06	6.0949e-06	2.0512e-06	0
681.663	5.382e-06	2.605e-06	3.2553e-06	1.4697e-06	3.402e-06	1.7511e-06	1.1976e-06	1.4895e-06	8.5051e-07	3.0308e-06	3.8152e-06	1.3202e-06	4.1433e-06	6.2192e-06	0
682.663	7.9601e-06	6.794e-06	3.2831e-06	1.101e-06	4.5307e-06	4.9757e-06	5.0652e-06	3.559e-06	1.657e-06	3.0279e-06	2.2534e-06	4.8795e-07	2.6513e-06	3.1705e-06	0
683.662	1.2692e-05	3.6659e-06	2.9184e-06	1.2911e-06	1.0061e-06	2.5393e-06	2.0317e-06	3.0748e-06	5.0721e-06	2.4787e-06	4.0057e-06	2.6862e-06	4.4942e-06	4.5881e-06	0
684.662	3.8801e-06	1.647e-06	1.5672e-06	3.4771e-06	2.3335e-06	4.0935e-06	9.4211e-07	5.1699e-06	3.6039e-06	2.3842e-06	2.7756e-06	2.0782e-06	5.0405e-06	2.5305e-06	0
685.661	4.8767e-06	2.1585e-06	1.4317e-06	3.6395e-06	4.1612e-06	2.285e-07	1.0108e-06	3.5532e-07	1.1705e-06	1.4273e-06	5.1625e-06	4.3204e-06	5.5159e-06	1.6782e-06	0
686.661	6.1257e-06	1.5336e-06	1.0617e-06	4.8753e-06	3.0048e-06	2.9716e-06	2.8871e-06	4.2533e-06	5.0957e-06	4.6681e-06	5.7445e-06	7.2165e-07	4.5726e-06	3.1132e-06	0
687.66	6.1901e-07	2.9797e-06	3.3474e-06	2.7273e-06	4.005e-06	2.1438e-06	2.9565e-06	2.032e-06	1.695e-06	2.6012e-06	1.0374e-06	2.6469e-06	7.7519e-06	6.2057e-07	0
688.66	5.7607e-06	1.1384e-06	1.4727e-06	4.6565e-06	5.3244e-06	1.8241e-06	5.1773e-06	4.846e-06	1.6296e-06	4.2549e-06	2.8147e-06	2.9696e-06	2.0554e-06	1.1842e-06	0
689.659	6.5944e-06	4.3755e-06	1.1513e-06	3.972e-06	7.0381e-07	1.6445e-06	3.5431e-06	1.0126e-06	1.9439e-06	6.1243e-06	1.6367e-06	2.1415e-06	1.2364e-06	2.2431e-06	0
690.659	2.6312e-06	4.836e-06	3.6176e-06	3.9578e-06	5.4133e-06	1.3776e-06	2.3219e-06	2.0117e-06	4.0199e-06	5.159e-06	6.5054e-06	2.676e-06	4.3316e-06	8.2086e-07	0
691.658	4.0729e-06	2.2891e-06	3.1364e-06	1.9114e-06	8.3421e-06	1.4346e-06	8.9561e-07	2.4873e-06	3.9968e-06	2.3633e-06	3.0443e-06	3.3877e-06	5.8747e-06	2.9589e-07	0
692.658	6.7076e-06	3.8152e-06	2.422e-06	2.897e-07	3.4709e-06	4.5836e-06	2.7912e-06	2.562e-06	8.7601e-07	4.45e-06	4.0235e-06	2.4759e-06	1.3369e-06	2.6769e-06	0
693.657	1.5243e-06	1.6849e-06	3.7827e-06	2.249e-06	2.2269e-06	2.5947e-06	3.1712e-06	2.1124e-06	3.2249e-06	3.1367e-06	1.8821e-07	3.7244e-06	5.2755e-06	1.3452e-06	0
694.657	3.457e-06	2.3295e-06	2.9865e-06	1.9403e-06	3.6206e-06	1.8022e-06	2.3037e-06	1.6425e-06	2.5971e-06	1.6491e-06	5.035e-06	2.9136e-06	6.0629e-06	4.1734e-06	0
695.656	2.4445e-06	1.7375e-06	4.3407e-06	3.6576e-06	3.853e-06	2.039e-06	2.3017e-06	4.2516e-06	2.4633e-06	2.1137e-06	1.0981e-06	3.3873e-06	4.8072e-06	2.2518e-06	0
696.656	6.9452e-06	3.7872e-06	2.4974e-06	2.2526e-06	6.046e-06	2.553e-06	3.3393e-06	1.1835e-06	4.3954e-06	2.8299e-06	9.6007e-07	4.699e-06	5.5321e-06	2.9983e-06	0
697.655	3.6576e-06	3.3174e-06	1.386e-06	7.866e-06	3.8176e-06	2.1874e-06	2.0788e-06	2.7135e-06	3.6988e-06	3.0201e-06	2.754e-06	5.1997e-06	4.1636e-06	4.4574e-06	0
698.655	7.2846e-06	3.2256e-06	3.4327e-06	5.5429e-06	2.3787e-06	4.7975e-06	3.028e-06	3.2666e-06	2.0581e-06	3.6482e-06	5.1009e-06	6.7205e-06	5.6807e-06	2.404e-06	0
699.654	2.2004e-06	4.7928e-06	2.1439e-06	4.3109e-06	4.2031e-07	3.9374e-06	2.4391e-06	2.4061e-06	2.2233e-06	1.775e-06	1.8592e-06	2.2011e-06	2.1857e-06	1.0572e-06	0
700.654	7.8968e-06	3.4309e-06	3.3103e-06	3.1494e-06	4.9312e-06	3.0798e-06	9.7864e-07	2.4627e-06	3.9197e-06	1.4006e-06	2.9966e-06	3.1456e-06	3.2082e-06	2.844e-06	0
701.653	8.8601e-06	1.7829e-06	4.2553e-06	6.3056e-06	1.5099e-06	4.9909e-07	2.366e-06	3.4449e-06	1.6215e-06	2.701e-06	3.4567e-06	3.0181e-06	4.2441e-06	3.898e-06	0
702.653	2.4323e-06	3.4227e-06	3.0176e-06	6.4766e-06	6.3722e-06	1.3113e-06	3.8106e-07	1.9128e-06	2.0009e-06	3.2533e-06	6.982e-07	1.7365e-06	1.0165e-06	1.0788e-06	0
703.652	2.7963e-06	1.5524e-06	1.8892e-06	1.3745e-06	1.9298e-06	4.4262e-06	3.6388e-06	5.1722e-06	9.2719e-07	3.2486e-06	4.1674e-06	3.5687e-06	4.2262e-06	8.1435e-07	0
704.652	5.2949e-06	3.3592e-06	3.1036e-06	3.6342e-06	1.7579e-06	3.5315e-07	2.5671e-06	4.0975e-06	2.453e-06	3.1133e-06	2.8877e-06	2.8086e-06	6.4336e-07	3.0242e-06	0
705.651	2.0955e-06	2.7434e-06	2.019e-06	2.1536e-06	4.5602e-06	2.1284e-06	1.3715e-06	2.0426e-06	2.3312e-06	2.9788e-06	3.9577e-06	3.31e-06	1.4264e-06	5.5725e-06	0
706.651	4.7462e-06	1.7364e-06	5.3444e-06	5.1424e-06	9.6897e-06	7.8847e-07	1.0554e-06	2.1729e-06	4.3539e-06	2.2835e-06	2.3305e-06	2.9003e-06	8.0819e-06	4.458e-06	0
707.65	4.6844e-06	3.3702e-06	2.9217e-06	9.698e-07	6.9211e-06	2.7005e-06	3.9266e-06	2.211e-06	1.7654e-06	2.1694e-06	2.8306e-06	1.114e-06	2.182e-06	4.3549e-06	0
708.65	4.4701e-06	2.3596e-06	4.0132e-06	1.6926e-06	4.8867e-06	1.288e-06	3.4676e-06	2.5983e-06	1.5745e-06	6.9025e-06	2.9685e-06	1.7129e-06	4.2212e-06	4.0275e-06	0
709.649	6.9679e-06	3.217e-06	3.1657e-06	1.6574e-06	2.7513e-06	4.0258e-06	2.5533e-06	7.9578e-07	5.4986e-06	2.0788e-06	4.9862e-06	5.6221e-06	3.0268e-06	7.8066e-06	0
710.649	1.1965e-06	2.5146e-06	2.2678e-06	6.085e-07	8.3599e-07	4.868e-06	2.4011e-06	2.7539e-06	3.8458e-06	3.0997e-06	6.8311e-06	2.6087e-06	3.2504e-06	3.3375e-06	0
711.648	3.6097e-06	3.6714e-06	1.4898e-06	7.1272e-07	1.111e-06	3.5722e-06	6.0294e-06	3.7796e-06	1.735e-06	4.4106e-06	2.0729e-06	2.7415e-06	3.4111e-06	2.216e-06	0
712.648	7.0155e-06	2.9195e-06	2.0878e-06	1.3874e-06	3.7547e-06	4.7567e-06	1.3708e-06	1.3507e-06	1.3143e-06	1.2484e-06	3.3782e-06	2.3979e-06	4.9313e-06	2.9087e-06	0
713.647	6.0636e-06	2.7545e-06	2.9455e-06	4.5095e-06	4.8696e-06	4.099e-06	2.5421e-06	3.3767e-06	2.4294e-06	1.7379e-06	4.2305e-06	2.7792e-06	4.5701e-06	2.1421e-06	0
714.647	5.8157e-06	2.4408e-06	1.3975e-06	2.6217e-06	3.8703e-06	7.6545e-07	3.1845e-06	2.419e-06	4.5629e-06	2.5334e-06	1.355e-06	2.7831e-06	4.4794e-06	2.6641e-06	0
715.646	7.4556e-06	3.5551e-06	3.4664e-06	2.7938e-06	2.1201e-06	3.5065e-06	2.916e-06	3.8361e-06	3.8855e-06	4.0082e-06	6.4495e-06	1.0253e-06	4.075e-06	1.3843e-06	0
716.646	1.5882e-06	1.4273e-06	2.6053e-06	2.3945e-06	1.4489e-06	2.2673e-06	2.3603e-06	2.9211e-06	1.7704e-06	3.6446e-06	5.6523e-06	1.7713e-06	4.1965e-06	3.6233e-06	0
717.645	5.3832e-06	6.2472e-06	4.1705e-06	2.1031e-06	7.7637e-07	4.8167e-07	2.6777e-06	1.1291e-06	1.8976e-06	4.9425e-06	3.3735e-06	1.6552e-06	4.5829e-06	2.361e-06	0
718.645	4.5148e-06	7.7621e-07	2.531e-06	2.2329e-06	4.6599e-06	2.6078e-06	5.1443e-06	1.3992e-06	4.5487e-06	2.5747e-06	2.1921e-06	3.107e-06	5.7708e-06	4.9455e-06	0
719.644	4.7782e-06	4.5661e-06	5.4006e-06	6.7926e-06	5.6245e-06	3.3276e-06	1.0304e-06	3.4713e-06	3.8686e-06	4.7429e-06	7.743e-06	3.2694e-06	1.43e-06	5.4865e-06	0
720.644	2.7211e-06	6.4112e-06	1.5932e-06	7.446e-06	4.529e-06	6.6676e-06	4.9955e-06	1.2077e-06	1.0814e-06	2.3107e-06	3.0856e-06	1.7943e-06	5.8037e-06	7.5724e-06	0
721.644	2.7135e-06	2.9428e-06	1.8559e-06	3.5382e-06	4.2325e-06	2.0184e-06	3.6686e-06	3.0563e-06	1.1968e-06	4.7875e-06	1.8366e-06	3.8071e-06	1.0177e-06	4.504e-06	0
722.643	6.251e-06	1.4593e-06	4.3303e-06	4.6365e-06	4.2593e-06	6.2722e-06	9.4789e-07	2.0899e-06	1.358e-06	1.2644e-06	6.523e-07	1.2752e-06	3.3493e-06	2.8343e-06	0
723.643	2.2803e-06	1.2548e-06	6.5352e-06	2.6544e-06	6.6967e-06	2.1732e-06	3.8829e-06	1.6743e-06	3.9384e-06	6.7902e-06	2.3627e-06	5.0914e-06	6.7257e-06	3.3656e-06	0
724.642	1.0565e-05	9.826e-06	1.8411e-06	2.7655e-06	3.3365e-06	2.3001e-06	3.593e-06	2.6719e-06	2.0926e-06	3.003e-06	8.5406e-06	3.2548e-07	5.7078e-06	4.8104e-06	0
725.642	1.75e-06	7.6889e-06	2.0878e-06	9.1039e-06	4.1211e-06	2.2986e-06	5.8415e-06	2.1075e-06	1.31e-06	1.1888e-06	5.1443e-06	4.8804e-06	2.8011e-06	2.182e-06	0
726.641	3.5774e-06	3.3031e-06	1.288e-06	1.4418e-06	7.0243e-06	4.1785e-06	2.359e-06	3.0609e-06	1.1542e-06	4.969e-06	3.6573e-07	1.5567e-06	6.989e-06	3.2032e-06	0
727.641	2.5742e-06	5.0366e-06	1.9268e-06	6.4485e-06	6.6527e-06	2.5858e-06	4.6102e-06	5.3189e-06	3.345e-06	5.9058e-06	3.4804e-06	4.1254e-06	7.2083e-06	1.7536e-06	0
728.64	5.7657e-06	5.2582e-06	2.6166e-06	3.0231e-06	4.2702e-06	4.5925e-06	9.9986e-07	8.327e-07	2.8106e-06	3.5281e-06	6.8322e-06	3.0586e-06	6.5303e-06	3.6736e-06	0
729.64	4.0692e-06	4.7969e-06	1.5324e-06	1.2776e-06	4.2082e-06	4.2802e-06	3.1117e-06	2.3571e-06	1.7816e-06	3.4415e-06	1.379e-06	4.3779e-06	3.8671e-07	1.4271e-06	0
730.639	1.1682e-05	2.9753e-06	4.6648e-06	1.8225e-06	6.5883e-06	1.8805e-06	5.97e-06	1.648e-06	3.2105e-06	2.2236e-06	2.9732e-06	1.3336e-06	4.2642e-06	2.9239e-06	0
731.639	2.8568e-06	2.9521e-06	4.713e-06	7.9141e-06	1.8305e-06	5.0765e-06	3.6387e-06	3.1258e-06	1.566e-06	4.9232e-06	3.0324e-06	4.4961e-06	2.6925e-06	5.4452e-06	0
732.638	6.0635e-06	2.8839e-06	2.9232e-06	1.9236e-06	4.1558e-06	2.1017e-06	5.1926e-06	2.1798e-06	5.8585e-06	3.3664e-06	4.0824e-06	4.429e-06	9.2818e-07	3.6762e-06	0
733.638	1.0611e-05	4.0123e-06	3.2559e-06	7.5039e-06	6.3448e-06	1.8305e-06	2.0645e-06	5.0837e-06	2.9911e-06	6.322e-06	5.4927e-06	4.1593e-06	8.0215e-06	3.2203e-06	0
734.637	1.6224e-05	1.585e-05	3.9416e-06	1.356e-05	9.9025e-06	2.7703e-06	1.9323e-06	2.327e-06	1.5581e-05	1.098e-05	1.2456e-05	7.1672e-06	1.9334e-06	5.5314e-06	0
735.637	1.0932e-05	3.018e-06	3.0129e-06	3.1744e-06	4.3614e-06	1.9027e-06	5.8943e-06	2.0569e-06	1.1535e-05	6.2256e-06	3.6998e-06	5.4686e-06	5.0722e-06	5.555e-06	0
736.636	5.8815e-06	5.5293e-06	2.87e-06	3.5706e-06	8.2572e-06	3.8683e-06	3.0355e-07	2.3565e-06	5.4734e-06	6.5277e-06	1.9807e-06	2.721e-06	4.0361e-06	6.521e-06	0
737.636	7.9369e-06	2.2781e-06	5.9859e-06	5.1722e-07	3.1778e-06	2.7149e-06	3.0042e-06	3.0391e-06	4.5142e-06	1.6208e-06	3.3787e-07	5.0954e-06	6.2961e-06	2.7547e-06	0
738.635	8.3238e-06	6.1151e-06	5.6392e-06	1.3512e-06	2.859e-06	3.6723e-06	7.1978e-07	1.0211e-06	6.0529e-06	5.3695e-06	3.5937e-06	2.4758e-06	5.6245e-06	7.6095e-06	0
739.635	6.5109e-06	2.654e-06	2.1418e-06	6.2043e-06	3.8808e-06	2.3703e-06	2.4974e-06	2.8634e-06	1.5671e-06	4.1558e-06	5.2087e-06	5.5804e-06	6.014e-06	7.8434e-06	0
740.634	5.4141e-06	2.9451e-06	4.8826e-07	2.9736e-06	1.773e-06	6.38e-06	4.5722e-06	4.0164e-06	7.1462e-06	1.7475e-06	1.9334e-06	4.0859e-06	3.5455e-06	5.8948e-06	0
741.634	7.3966e-06	1.9808e-06	4.5598e-06	7.4206e-06	4.5604e-06	2.9814e-06	3.3269e-06	6.1499e-06	6.5611e-06	2.6632e-06	4.266e-06	4.2275e-06	5.6677e-06	2.506e-06	0
742.633	4.8419e-06	4.4533e-06	3.5345e-06	1.5119e-06	4.5072e-06	3.1837e-06	6.2276e-06	2.3173e-06	1.6142e-06	8.508e-06	3.6487e-06	1.9554e-06	4.8765e-06	4.8039e-06	0
743.633	7.6708e-06	4.2556e-06	7.9365e-06	1.9739e-06	1.5342e-06	5.2898e-06	5.3123e-06	5.4215e-07	2.0068e-06	1.6372e-06	2.5219e-06	4.8101e-06	7.1322e-06	9.4855e-07	0
744.632	9.4214e-06	1.5704e-06	1.1872e-06	5.5572e-06	6.1929e-06	4.508e-06	1.7929e-06	1.957e-06	1.0591e-06	1.6617e-06	4.2135e-06	3.7885e-06	2.1868e-06	4.5727e-06	0
745.632	5.2996e-06	9.0592e-06	1.7515e-06	7.2735e-06	5.4593e-06	2.5194e-06	3.9232e-06	4.2947e-06	5.7463e-06	5.6926e-06	4.7812e-06	1.7162e-06	6.8978e-06	9.5829e-06	0
746.631	5.5848e-06	1.9813e-06	3.302e-06	4.4006e-06	3.5353e-06	3.6353e-06	1.8811e-06	5.7532e-06	5.7842e-06	2.4057e-06	4.4649e-06	3.8236e-06	4.821e-06	3.2013e-06	0
747.631	1.13e-05	2.3116e-06	6.6597e-06	4.2784e-06	4.9054e-06	2.2313e-06	7.9376e-06	8.2096e-07	3.5741e-06	5.5792e-06	6.5131e-06	4.442e-06	4.4643e-06	2.7271e-06	0
748.63	3.9688e-06	2.44e-06	1.278e-06	1.1469e-06	3.1799e-06	4.0143e-06	6.4566e-06	2.3161e-06	3.1434e-06	4.2598e-06	4.7448e-06	5.91e-06	4.0767e-06	1.1007e-05	0
749.63	2.3716e-06	3.9905e-06	1.4676e-06	3.3517e-06	9.082e-06	7.9878e-07	2.1361e-06	5.8141e-06	1.9984e-06	9.4418e-06	2.2059e-06	3.6377e-06	5.0526e-06	1.0426e-06	0
750.629	6.3302e-06	2.4027e-06	3.8119e-06	3.9526e-06	1.1098e-06	3.3663e-06	1.8686e-06	4.9326e-06	4.7813e-06	8.8688e-06	1.4003e-06	4.8746e-06	8.9806e-06	8.4909e-06	0
751.629	3.3776e-06	3.7147e-06	2.6406e-06	3.1976e-06	1.9253e-06	3.883e-06	4.3564e-06	5.101e-06	4.507e-06	6.9213e-06	5.9306e-06	4.4996e-06	8.457e-06	5.6952e-06	0
752.628	1.7535e-06	2.3128e-06	1.0852e-06	3.3864e-06	1.7862e-06	2.7446e-06	2.429e-06	1.4903e-06	1.1677e-06	1.7724e-06	4.7197e-06	2.964e-06	5.3905e-06	2.2699e-06	0
753.628	1.3217e-05	4.8288e-06	6.1245e-06	6.3044e-06	2.7876e-06	6.2414e-06	2.8129e-06	5.5884e-06	6.6876e-06	3.4676e-06	4.9741e-06	3.1131e-06	9.8544e-06	5.2963e-06	0
754.627	8.7556e-06	4.9925e-06	5.6686e-06	2.5575e-06	1.1463e-06	1.8408e-06	2.8497e-06	3.7038e-06	2.479e-06	2.9059e-06	6.9158e-06	2.1327e-06	2.9427e-06	7.8257e-06	0
755.627	6.5436e-06	5.2094e-06	1.0432e-06	5.5163e-06	3.8223e-07	4.7554e-06	3.8418e-06	2.5841e-06	3.0224e-06	5.5805e-06	6.3114e-06	5.6796e-06	2.1207e-06	3.6767e-06	0
756.626	6.2598e-06	7.2045e-06	8.123e-06	3.8428e-06	2.7091e-06	6.1174e-06	3.0281e-06	2.2713e-06	7.251e-06	6.3649e-06	9.1577e-06	4.2668e-06	9.8805e-06	5.1935e-06	0
757.626	2.3969e-05	6.2455e-06	4.3418e-06	4.7258e-06	7.8983e-06	2.9545e-07	5.4729e-06	4.55e-06	1.5528e-06	7.4721e-06	4.8938e-06	2.9331e-06	8.5032e-07	2.6974e-06	0
758.625	7.0644e-06	4.0053e-06	5.8082e-06	3.024e-06	1.3064e-06	1.6024e-06	2.1405e-06	5.4081e-06	2.1892e-06	2.862e-06	4.087e-06	4.8542e-06	7.4228e-06	3.9645e-06	0
759.625	4.7944e-06	8.587e-06	5.0305e-06	2.4156e-06	1.9363e-06	6.4975e-06	1.9806e-06	3.3367e-06	9.7577e-06	1.9396e-06	4.524e-06	4.3258e-06	5.5701e-06	3.2378e-06	0
760.624	8.3746e-07	4.4889e-06	7.9217e-06	6.0829e-06	2.2281e-06	3.5807e-06	4.5051e-06	2.3767e-06	6.0807e-06	4.254e-06	4.523e-07	1.1309e-06	9.0351e-06	4.0777e-06	0
761.624	1.4674e-05	5.5199e-06	1.201e-07	6.7437e-06	4.8495e-06	3.2544e-06	3.2663e-06	3.8089e-06	3.654e-06	6.7656e-06	2.307e-06	2.999e-06	9.4629e-06	3.7533e-06	0
762.623	4.554e-06	5.8052e-06	2.6187e-06	6.2671e-06	2.9193e-06	3.7422e-06	5.3426e-06	2.5573e-06	4.2e-06	4.8133e-06	5.4072e-06	1.9006e-06	7.2462e-06	2.075e-06	0
763.623	1.4093e-05	4.8172e-06	3.4023e-06	2.9665e-07	2.1378e-06	4.796e-06	2.5281e-06	2.3135e-06	9.4491e-06	5.6557e-06	8.2484e-06	7.8967e-06	1.0025e-05	1.4489e-05	0
764.622	1.1952e-05	2.6226e-06	6.0516e-06	6.1678e-06	7.3014e-06	1.4745e-06	3.6738e-06	3.2489e-06	2.0067e-06	3.31e-06	7.8546e-06	3.031e-06	5.2522e-06	2.663e-06	0
765.622	1.036e-05	2.6679e-06	7.5891e-06	4.2672e-06	5.4073e-06	3.0544e-06	2.229e-06	2.6589e-06	3.9672e-06	9.3808e-07	6.0297e-07	6.0589e-06	3.6556e-06	6.0323e-06	0
766.621	2.3726e-06	2.9932e-06	4.9236e-06	4.9803e-06	3.5767e-06	3.2684e-06	1.1845e-06	5.4922e-06	3.5593e-06	8.7741e-06	3.9554e-06	9.6173e-06	1.9819e-06	4.7985e-06	0
767.621	5.5391e-06	8.8069e-06	4.5777e-06	2.3541e-06	7.6042e-06	1.5737e-06	1.651e-06	7.5249e-06	3.2638e-06	1.8792e-06	1.7059e-06	4.365e-06	3.3962e-06	1.1572e-06	0
768.62	1.1383e-05	5.1193e-06	4.9951e-06	8.8665e-06	4.5392e-06	2.8881e-06	3.6752e-06	8.0458e-06	4.9611e-06	2.3434e-06	2.4377e-06	4.262e-06	1.1718e-05	4.52e-06	0
769.62	9.2455e-06	4.6502e-06	7.2603e-06	1.0556e-05	1.0261e-06	1.2327e-06	3.8728e-06	1.5309e-06	3.5732e-06	7.7669e-06	2.6285e-06	4.9546e-06	2.5636e-06	1.939e-06	0
770.619	4.2386e-06	3.9674e-06	1.3669e-05	9.1273e-06	4.3576e-06	2.466e-06	7.7982e-06	6.2223e-07	5.8803e-06	4.1116e-06	3.8935e-06	2.1132e-06	8.1204e-06	1.298e-05	0
771.619	4.8262e-06	6.19e-06	4.555e-06	5.0021e-06	4.9871e-06	1.0468e-06	2.262e-06	5.1969e-06	6.5491e-06	1.0625e-05	5.0745e-06	3.6127e-06	4.8654e-06	3.4308e-06	0
772.618	3.2148e-06	2.105e-06	1.8139e-06	7.2419e-06	5.4417e-06	5.2506e-06	5.0485e-07	3.7113e-06	3.0671e-06	4.603e-06	1.4161e-06	7.6411e-06	4.3544e-06	3.9021e-06	0
773.618	8.3134e-06	5.7786e-06	2.5803e-06	1.067e-05	5.3893e-06	4.1588e-06	1.5029e-06	1.5025e-06	5.5904e-07	5.7078e-06	4.6533e-06	3.5783e-06	7.1372e-06	9.5097e-06	0
774.617	1.1802e-05	1.256e-05	4.4454e-06	3.7105e-06	3.5674e-06	3.1934e-06	1.2503e-06	2.044e-06	6.7976e-06	3.5538e-06	2.7113e-06	1.1291e-06	4.9986e-06	1.6904e-06	0
775.617	7.2154e-06	2.318e-07	2.8801e-06	7.1269e-06	9.5525e-06	3.6733e-06	5.1545e-06	1.7179e-06	2.9231e-06	3.0536e-07	2.6048e-06	4.5019e-06	6.7579e-06	2.4215e-06	0
776.616	1.171e-05	2.9543e-06	3.3823e-06	5.0585e-06	5.2982e-06	2.3695e-06	3.5667e-06	9.9146e-07	4.1242e-06	4.19e-06	5.5363e-06	2.586e-06	6.9407e-06	1.1416e-05	0
777.616	1.0663e-05	2.3124e-06	2.3306e-06	1.0715e-05	7.3279e-06	2.2065e-06	5.9833e-06	7.3567e-07	4.7464e-06	3.8368e-06	2.9127e-06	1.3689e-06	7.2782e-06	4.5302e-06	0
778.615	1.3217e-05	1.006e-05	4.4646e-06	7.6772e-06	1.0975e-05	5.0077e-06	4.0657e-06	3.4551e-06	2.1562e-06	6.3486e-06	4.1602e-06	1.8717e-06	9.6845e-06	4.7413e-06	0
779.615	1.2114e-05	4.8616e-06	5.1319e-06	3.6594e-06	2.8087e-06	1.0254e-05	1.3503e-06	8.9427e-06	3.2053e-06	1.2969e-05	4.9968e-06	6.8e-07	2.7599e-06	7.0623e-06	0
780.614	4.9691e-06	6.4719e-06	5.3678e-06	7.901e-06	1.9446e-06	2.5859e-06	6.2445e-06	4.0395e-06	1.4602e-06	5.8211e-06	8.3049e-07	7.8503e-07	3.8828e-06	8.5293e-06	0
781.614	8.558e-06	3.2848e-06	5.7488e-06	4.5102e-06	4.4902e-06	1.1438e-05	3.3139e-06	1.5518e-06	6.4389e-06	6.3223e-06	4.1397e-06	1.0937e-06	9.5713e-06	5.3972e-07	0
782.613	7.7426e-06	1.831e-06	7.6015e-06	7.2541e-06	1.4692e-05	5.1634e-06	4.9956e-06	5.6967e-06	7.855e-06	7.488e-06	4.7021e-06	1.6972e-06	4.3483e-06	7.3893e-06	0
783.613	2.8549e-06	2.9082e-06	4.5669e-06	1.1455e-05	3.5701e-06	7.5024e-06	2.5363e-06	4.8059e-06	8.0324e-06	3.1426e-06	5.7806e-06	3.8249e-06	5.0096e-06	7.6534e-06	0
784.612	6.9151e-06	4.9523e-06	6.9942e-06	1.9977e-06	9.281e-06	5.678e-06	3.3392e-06	4.3506e-06	1.0234e-05	3.2987e-06	9.5115e-06	3.7799e-06	9.1046e-06	6.6471e-06	0
785.612	4.2004e-06	5.4852e-06	3.8372e-06	1.5324e-06	8.0932e-06	1.2472e-06	5.9077e-06	4.0747e-06	1.7893e-06	4.9642e-06	2.2594e-06	8.5499e-06	2.8511e-06	1.4956e-06	0
786.611	8.7613e-06	7.2147e-06	5.9721e-06	4.4247e-06	5.5068e-07	7.773e-06	6.1714e-06	1.1702e-05	4.6536e-06	4.92e-06	1.7863e-06	1.7536e-06	1.0395e-05	5.5767e-06	0
787.611	1.6874e-05	9.3173e-06	2.8396e-06	3.2525e-06	6.905e-06	3.0409e-06	4.333e-06	1.2872e-06	3.9272e-06	8.4592e-06	5.2968e-06	3.091e-06	4.8751e-06	5.0065e-06	0
788.61	1.4572e-06	3.7921e-06	2.4563e-06	6.2936e-06	6.4079e-06	7.9399e-06	7.2701e-06	5.7548e-06	5.2777e-06	5.4042e-06	4.9279e-06	1.9426e-06	7.424e-06	4.9746e-06	0
789.61	1.0836e-05	1.9651e-06	6.8068e-06	1.9039e-06	6.4589e-06	1.6658e-06	2.8813e-06	7.1705e-06	3.5266e-06	3.013e-06	3.2844e-06	2.199e-06	1.1816e-05	3.961e-06	0
790.609	1.052e-05	6.9143e-06	9.3771e-06	7.574e-06	1.1488e-05	4.7314e-06	3.2448e-06	1.7419e-06	7.4301e-06	2.9201e-06	5.9053e-06	8.8998e-06	7.7985e-06	1.7153e-06	0
791.609	5.1694e-06	5.4496e-06	5.0248e-06	7.1619e-07	9.7501e-06	9.488e-06	3.9111e-06	1.1608e-05	8.4065e-06	6.94e-07	1.0548e-05	7.0634e-06	8.2158e-06	1.1836e-05	0
792.608	7.9196e-06	1.0704e-05	3.564e-06	7.4197e-06	7.9644e-06	6.2213e-06	5.7083e-06	2.9717e-06	1.1904e-05	6.3273e-06	5.021e-06	3.0703e-06	3.5204e-06	3.3247e-06	0
793.608	1.3135e-05	1.153e-05	5.8735e-06	9.9744e-06	5.9878e-06	5.07e-06	5.4641e-06	4.3577e-06	2.0285e-06	5.6932e-06	4.0074e-06	1.9915e-06	2.2361e-06	7.6705e-06	0
794.607	9.4631e-06	7.9124e-06	2.7483e-06	7.7458e-06	1.3991e-05	5.0695e-06	6.9865e-06	1.7421e-06	6.3952e-06	1.6236e-06	3.9284e-06	2.2746e-06	2.767e-06	1.0919e-05	0
795.607	1.0029e-05	1.0179e-05	6.4941e-06	8.8745e-06	1.3926e-06	6.79e-06	8.7141e-06	3.9468e-06	4.1481e-06	2.6178e-06	7.813e-06	5.8814e-06	3.7842e-06	2.8624e-06	0
796.606	6.6529e-06	4.8028e-06	2.1434e-06	5.9527e-06	4.5187e-06	4.0544e-06	2.079e-06	9.2709e-06	2.7137e-06	4.7328e-06	6.3931e-06	1.3148e-06	3.0181e-06	8.9906e-06	0
797.606	8.9497e-06	4.2614e-06	8.5302e-06	5.8528e-06	7.1637e-06	1.0111e-05	4.5948e-06	7.017e-06	3.9971e-06	1.662e-05	1.986e-06	6.973e-06	5.7209e-06	6.2112e-06	0
798.605	1.294e-05	1.0348e-05	2.5288e-06	1.0182e-05	4.5311e-06	2.925e-06	9.3053e-06	3.6602e-06	4.1044e-06	1.6744e-06	3.1975e-06	5.4061e-06	6.047e-06	6.017e-06	0
799.605	1.4782e-05	8.0657e-06	3.7134e-06	8.5399e-06	8.9584e-06	1.946e-06	1.1942e-06	1.3199e-05	4.819e-06	3.7898e-06	5.1629e-06	2.8078e-06	8.2876e-06	5.5884e-06	0
800.605	7.5031e-06	4.665e-06	5.9963e-06	4.4051e-06	1.319e-05	3.2829e-06	8.7162e-06	7.2141e-06	2.9419e-06	3.555e-06	4.1384e-06	4.2434e-06	5.8521e-06	9.9688e-06	0
801.604	8.9851e-06	3.7685e-06	7.397e-06	1.4224e-05	2.922e-06	7.5764e-06	3.5946e-06	4.9156e-06	4.517e-06	7.7344e-06	3.5601e-06	6.5358e-06	9.4662e-07	1.4002e-06	0
802.604	7.0626e-06	2.9135e-06	7.4858e-06	7.1449e-06	5.6163e-06	3.2258e-06	6.7154e-06	2.9237e-06	2.1443e-06	6.0668e-06	5.0685e-06	3.1839e-06	3.3437e-06	6.8772e-06	0
803.603	1.4329e-07	1.761e-05	9.5551e-06	1.9859e-06	6.6437e-06	5.411e-06	8.2265e-06	5.5781e-06	8.8947e-06	5.5866e-06	3.025e-06	9.866e-06	5.4536e-06	9.6684e-06	0
804.603	1.3988e-05	1.4485e-06	9.292e-06	9.5247e-06	6.8512e-06	3.4891e-06	8.475e-06	5.6733e-06	1.0017e-05	2.5666e-06	1.0748e-05	8.759e-06	1.2533e-05	5.9564e-06	0
805.602	2.4759e-05	1.2421e-06	1.1603e-05	2.8383e-06	7.2261e-06	6.9478e-06	1.3577e-05	1.0509e-06	3.1579e-06	2.3338e-06	6.3355e-06	6.6976e-06	2.1672e-06	2.366e-06	0
806.602	2.6308e-06	3.9329e-06	1.1639e-05	1.109e-05	6.6337e-06	1.2243e-06	8.24e-06	1.0951e-06	6.1094e-06	4.0448e-06	1.4147e-05	7.2005e-06	6.4587e-06	6.3573e-06	0
807.601	4.1123e-06	3.9456e-06	7.6078e-06	6.5212e-06	1.1217e-05	7.085e-06	7.9412e-06	4.453e-06	4.6395e-06	4.3871e-06	5.5589e-06	2.8994e-06	3.166e-06	1.1387e-05	0
808.601	1.4719e-05	2.1615e-05	1.3772e-05	8.1262e-06	3.9814e-06	8.9359e-06	8.6603e-06	4.2865e-06	6.5856e-06	1.5426e-05	4.3608e-06	6.6453e-06	7.9352e-06	9.8479e-06	0
809.6	1.4859e-05	2.1587e-06	6.0485e-06	9.217e-06	2.296e-06	2.8395e-06	4.1702e-06	1.3984e-06	5.2738e-06	3.0183e-06	3.3103e-06	1.0413e-05	1.2867e-05	8.3882e-06	0
810.6	1.0991e-05	1.1078e-05	4.0085e-06	4.8736e-06	2.4099e-06	3.1368e-06	3.2305e-06	5.9023e-06	4.9106e-06	1.3892e-06	1.5187e-06	5.7913e-06	2.3358e-06	6.6692e-06	0
811.599	8.5488e-06	7.1073e-06	2.3833e-06	1.1588e-05	1.0291e-05	2.2034e-06	1.2993e-05	4.6465e-06	1.2044e-05	9.9011e-06	1.0011e-05	6.6057e-06	6.1748e-06	1.3744e-05	0
812.599	2.0293e-05	1.2242e-05	1.202e-06	5.0871e-06	4.3766e-06	5.85e-06	1.1065e-05	8.6349e-06	2.9408e-06	1.9425e-06	5.0078e-06	6.0866e-06	1.5436e-05	2.1009e-05	0
813.598	1.4674e-05	2.9485e-06	8.6968e-06	6.859e-06	1.0471e-05	2.5319e-06	2.6967e-06	6.8949e-06	5.1435e-06	1.457e-05	1.986e-06	1.4367e-06	8.0174e-06	1.7601e-06	0
814.598	7.6705e-06	7.9904e-06	9.6075e-06	2.0571e-05	1.1841e-05	1.098e-05	1.6239e-06	6.8759e-06	2.1916e-06	5.8956e-06	1.9503e-06	3.3772e-06	4.6426e-06	5.23e-06	0
815.597	1.3704e-05	9.7855e-06	1.0303e-05	1.5735e-05	3.7798e-06	6.6246e-06	1.3177e-05	8.1716e-06	9.5835e-06	3.4403e-06	4.8315e-06	8.6935e-06	7.3838e-06	1.153e-05	0
816.597	8.3881e-06	1.4748e-05	8.4212e-06	1.1665e-05	7.9407e-06	9.9833e-06	7.5524e-06	2.3011e-06	5.1288e-06	4.0088e-06	2.7141e-06	8.5832e-06	1.6648e-05	3.4554e-06	0
817.596	1.5925e-05	8.9585e-06	5.6078e-06	1.0307e-05	1.0104e-05	5.9075e-06	5.747e-06	4.9947e-06	4.7118e-06	1.2221e-05	3.7861e-06	9.7205e-06	1.1279e-06	3.8834e-06	0
818.596	1.018e-05	1.1726e-05	8.1928e-06	1.1427e-05	1.4771e-05	2.2092e-06	2.2686e-06	8.2742e-06	2.3723e-06	6.6639e-06	7.4146e-06	7.2529e-06	6.766e-06	3.8952e-06	0
819.595	1.2751e-05	5.9589e-06	1.0008e-05	6.0452e-06	8.8762e-06	8.5034e-06	3.2886e-06	6.6689e-06	3.1518e-06	7.4383e-06	6.7059e-06	3.2924e-06	3.3929e-06	1.7653e-05	0
820.595	2.011e-05	8.5099e-06	1.2106e-05	1.405e-05	1.0278e-05	7.7843e-06	4.4398e-06	6.605e-06	5.9457e-06	3.5347e-06	8.9091e-06	2.2047e-06	7.9961e-06	1.2446e-05	0
821.594	1.3117e-05	3.6382e-06	5.475e-06	1.0575e-05	1.0675e-05	4.1925e-06	4.0545e-06	3.951e-06	5.0971e-06	7.2657e-06	5.4674e-06	9.2736e-06	1.2908e-05	2.8698e-06	0
822.594	1.122e-05	1.3282e-05	1.208e-05	6.2227e-06	3.6798e-06	9.5674e-06	9.9459e-06	1.3742e-05	5.4397e-06	1.5312e-05	8.1006e-06	7.1627e-07	5.7156e-06	4.5148e-06	0
823.593	1.5167e-05	1.0585e-05	1.8589e-06	2.5466e-06	7.651e-06	6.9776e-06	2.1214e-06	7.2001e-06	5.271e-06	1.2145e-05	2.7567e-06	3.977e-06	2.0076e-06	6.9221e-06	0
824.593	1.5274e-05	4.4503e-06	2.0172e-05	1.2364e-05	3.6895e-06	6.3304e-06	4.3391e-06	5.0249e-06	7.8806e-06	5.3099e-06	4.249e-06	7.5034e-06	3.0783e-06	2.6773e-06	0
825.592	6.7511e-06	7.18e-06	9.6258e-06	1.3167e-05	7.8321e-06	5.5265e-06	4.1042e-06	7.124e-06	9.5028e-06	1.169e-05	8.1997e-06	1.0145e-05	8.1166e-06	7.3612e-06	0
826.592	8.7379e-06	1.0536e-05	9.1309e-06	4.6621e-06	7.2914e-06	1.0818e-06	6.9466e-06	3.8745e-06	5.7917e-06	1.262e-06	1.3849e-05	6.798e-06	6.7687e-06	8.9413e-06	0
827.591	6.3647e-06	5.9406e-06	7.1752e-06	8.9334e-06	8.5881e-06	6.2829e-06	5.1089e-06	3.7813e-06	8.9599e-06	1.2236e-05	1.2935e-05	1.3961e-05	4.5401e-06	9.6674e-06	0
828.591	2.1852e-06	5.4993e-06	4.3597e-06	1.5334e-05	1.262e-05	4.296e-06	6.4876e-06	4.4663e-06	9.6472e-07	5.3185e-06	6.2706e-06	7.0568e-06	4.4162e-06	1.3462e-05	0
829.59	1.4527e-05	2.1205e-05	9.2783e-06	9.5391e-06	1.413e-05	8.6039e-06	9.058e-06	3.649e-06	3.0405e-06	1.6684e-05	1.1396e-05	4.6204e-06	7.0598e-06	7.654e-06	0
830.59	1.4564e-05	2.7919e-05	1.8015e-05	1.5844e-05	2.7439e-05	2.0997e-06	1.3297e-06	4.4231e-06	3.0826e-05	1.7762e-05	1.8241e-05	1.6293e-05	1.8545e-05	2.3486e-06	0
831.589	4.3312e-06	3.0974e-05	2.6266e-05	1.8674e-05	2.2529e-05	8.021e-06	5.7938e-07	3.6781e-06	3.9108e-05	3.6968e-05	1.0016e-05	6.4327e-06	6.1619e-06	1.5746e-05	0
832.589	1.3118e-05	6.1761e-06	1.6194e-05	1.6018e-05	9.6631e-06	1.2391e-05	1.4634e-05	3.1003e-07	1.4322e-05	1.1195e-05	1.172e-05	9.7882e-06	3.9704e-06	3.79e-06	0
833.588	5.6289e-06	6.613e-06	7.3428e-06	1.0585e-05	7.0236e-06	2.4371e-06	9.2099e-06	1.9006e-05	5.4451e-06	5.4964e-06	1.658e-05	1.4543e-05	2.394e-06	1.1782e-05	0
834.588	1.0459e-05	1.2621e-05	1.6618e-06	9.3764e-06	2.2236e-05	8.8493e-06	2.5554e-06	7.6216e-06	7.5945e-06	1.59e-05	2.9047e-06	1.2961e-05	9.8242e-06	1.3363e-05	0
835.587	1.354e-06	1.143e-05	4.0569e-06	1.0281e-05	1.1805e-05	5.6172e-06	4.0745e-06	2.2088e-06	1.2242e-05	1.1229e-05	8.1391e-06	6.9814e-06	1.7491e-05	3.2719e-06	0
836.587	4.8485e-06	1.0397e-05	3.3327e-06	9.9399e-06	2.1957e-05	6.2406e-06	7.2311e-06	3.6528e-06	1.7512e-05	9.7426e-06	3.8674e-06	1.0702e-05	8.7986e-06	1.5754e-05	0
837.586	1.5564e-05	6.5245e-06	1.464e-05	1.8345e-05	1.0788e-05	4.3616e-06	5.1014e-06	3.977e-06	1.3647e-05	3.6355e-06	1.1573e-05	1.1241e-05	6.804e-06	5.0154e-06	0
838.586	1.1152e-05	3.7864e-06	5.6712e-06	9.4682e-06	6.7454e-06	9.0104e-06	2.4721e-06	2.6826e-06	3.5352e-06	1.1699e-05	3.8889e-06	3.8516e-06	6.4845e-06	6.2289e-06	0
839.585	1.6068e-05	1.168e-05	1.0004e-05	2.435e-06	6.8603e-06	1.0359e-05	3.3641e-06	1.0636e-05	7.3868e-06	6.8144e-06	9.2452e-06	4.7842e-06	7.8051e-07	2.3143e-05	0
840.585	6.8674e-06	5.2497e-06	1.6519e-05	1.1601e-05	6.4531e-06	5.1956e-06	1.3448e-05	1.087e-05	3.8982e-06	1.2736e-05	6.0137e-06	2.5305e-06	8.6249e-06	7.2056e-06	0
841.584	1.5922e-05	9.8275e-06	8.4241e-06	1.1428e-05	1.105e-05	9.1338e-06	2.6389e-06	2.3368e-05	1.2647e-06	1.3244e-05	6.2177e-06	4.0526e-06	1.1667e-05	1.4207e-05	0
842.584	7.1776e-06	7.3736e-06	1.5611e-05	9.8583e-06	6.3042e-06	4.9511e-06	7.1733e-06	1.5459e-06	2.4689e-06	7.5628e-06	2.1319e-06	3.3637e-06	8.9718e-06	7.6453e-06	0
843.583	9.2806e-06	7.2196e-06	1.481e-05	5.8093e-06	5.5677e-06	6.0919e-06	1.5116e-06	4.8672e-06	7.5486e-06	1.1789e-05	7.9054e-06	6.3318e-06	1.5084e-05	1.8441e-05	0
844.583	3.9847e-05	1.9172e-06	9.2905e-06	4.7917e-06	7.4641e-06	9.6239e-06	4.9189e-06	1.0255e-05	1.4469e-05	5.0069e-06	1.5071e-05	9.2009e-06	1.7898e-05	1.0785e-05	0
845.582	8.5765e-06	5.6684e-06	9.0915e-06	1.2328e-05	5.615e-06	5.0257e-06	2.2161e-06	6.793e-06	7.2881e-06	4.4502e-06	3.3233e-06	2.937e-06	1.5126e-05	1.8919e-05	0
846.582	2.4195e-05	8.312e-06	1.0848e-05	1.3469e-05	1.4393e-05	1.0619e-05	8.4337e-06	1.0938e-05	1.0288e-05	1.8484e-05	1.3567e-05	4.3982e-06	1.0129e-05	1.8095e-05	0
847.581	2.0404e-05	8.418e-06	1.1563e-05	1.7707e-05	5.3301e-06	3.2425e-06	7.785e-06	3.7345e-06	8.8421e-06	7.8464e-06	6.024e-06	1.3303e-05	9.0991e-06	9.3633e-06	0
848.581	1.6486e-05	7.1764e-06	7.8294e-06	2.1383e-05	2.0512e-06	7.9803e-06	1.0708e-05	1.4379e-05	4.9475e-06	1.7984e-05	3.852e-06	9.8195e-06	5.7999e-06	1.8897e-05	0
849.58	5.481e-06	9.2621e-06	6.9117e-06	1.4743e-05	2.4299e-05	1.1188e-05	3.5915e-06	4.8915e-06	4.5866e-06	4.0766e-06	1.3096e-05	7.9643e-06	1.0101e-05	3.9311e-06	0
850.58	3.8338e-06	1.306e-05	1.2718e-05	1.1464e-05	1.212e-05	5.1806e-06	1.058e-05	5.3457e-06	6.3216e-06	5.9516e-06	7.0466e-06	9.8944e-06	1.6559e-05	8.3253e-06	0
851.579	1.9433e-05	8.0044e-06	5.1276e-06	1.1323e-05	1.8233e-05	1.6534e-05	6.2482e-06	1.5061e-05	1.1519e-05	4.3663e-06	1.1638e-05	8.621e-06	7.5683e-06	4.176e-06	0
852.579	7.2277e-06	8.497e-06	3.1054e-06	2.2154e-05	7.7074e-06	9.0395e-06	6.8888e-06	1.3347e-05	9.6053e-06	8.1319e-06	4.9455e-06	3.5981e-06	4.2626e-06	1.2848e-05	0
853.578	1.6182e-05	1.7176e-06	6.9115e-06	7.2179e-06	1.3714e-05	2.2459e-06	1.0899e-05	9.1484e-06	7.5489e-06	6.5884e-06	4.6366e-06	1.4781e-06	2.2287e-05	1.0615e-05	0
854.578	1.9753e-05	2.7161e-06	4.753e-06	7.5204e-06	6.5866e-06	6.3982e-06	7.939e-06	1.1487e-05	6.25e-06	6.1965e-06	1.633e-05	7.1797e-06	1.5332e-05	2.6563e-05	0
855.577	1.8842e-05	1.7909e-05	6.242e-06	1.5716e-05	2.0899e-05	8.0929e-06	3.2522e-06	1.0583e-05	1.1098e-05	1.2743e-06	1.603e-05	1.1416e-05	3.2099e-06	1.9118e-05	0
856.577	1.8206e-05	1.1061e-05	1.3694e-05	1.3715e-05	1.6574e-05	1.0888e-05	1.4614e-05	5.2726e-06	1.5624e-05	2.4712e-05	1.7471e-05	7.6781e-07	9.9635e-06	1.0079e-05	0
857.576	2.9905e-05	7.7099e-06	7.4726e-06	3.5939e-06	5.8436e-06	7.9782e-06	1.2571e-05	9.5231e-06	3.4349e-06	1.9927e-05	4.1429e-06	1.1703e-05	4.757e-06	2.4622e-05	0
858.576	1.7622e-05	2.058e-05	4.7006e-06	1.1201e-05	1.1341e-05	3.8933e-06	2.2314e-06	1.78e-05	2.8684e-06	7.7299e-06	9.8592e-06	5.786e-06	1.5507e-06	5.7304e-06	0
859.575	1.889e-05	5.6612e-06	1.3537e-05	7.1064e-06	1.1197e-05	6.4235e-06	3.4418e-06	3.8552e-06	5.9226e-06	2.2425e-05	7.4498e-06	3.5956e-06	1.8896e-05	6.8807e-06	0
860.575	2.7456e-05	1.1791e-05	1.3255e-05	2.0633e-05	4.0106e-06	5.6778e-06	8.1083e-06	2.0127e-05	1.1116e-05	3.6309e-06	6.3917e-06	2.4577e-06	1.8759e-05	8.1965e-06	0
861.574	2.6718e-05	5.5948e-06	2.0127e-05	2.9515e-05	9.1719e-06	1.1295e-05	8.5039e-06	8.3341e-06	7.1645e-06	1.8313e-05	1.6299e-05	2.3257e-06	7.1837e-06	1.2746e-05	0
862.574	9.678e-06	1.4366e-05	6.329e-06	1.5809e-05	1.4649e-05	9.6095e-06	2.5879e-06	2.5332e-06	4.8591e-06	1.593e-05	1.1428e-06	2.0647e-05	7.7503e-06	1.4997e-05	0
863.573	1.1188e-05	1.5852e-05	1.8054e-05	1.3253e-05	7.009e-06	5.2364e-06	1.1932e-05	1.2277e-06	9.2553e-06	1.0033e-05	1.0815e-05	2.2887e-06	8.6766e-06	3.0879e-06	0
864.573	1.6427e-05	5.0232e-06	4.4003e-06	1.4635e-05	7.4056e-07	9.3639e-06	8.1394e-06	3.1956e-06	9.8028e-06	1.8574e-05	2.7746e-06	1.8098e-05	9.7928e-06	7.4165e-06	0
865.572	3.21e-05	5.9908e-06	4.9631e-06	1.6722e-05	7.4565e-06	1.7393e-05	1.282e-06	9.1634e-06	1.036e-05	1.1479e-05	8.1906e-06	4.9195e-06	6.3521e-06	8.9441e-06	0
866.572	6.2333e-06	1.4504e-05	6.5118e-06	1.8109e-05	7.0144e-06	6.8062e-06	2.0986e-05	1.278e-05	1.4378e-06	1.5467e-05	7.7241e-06	6.3655e-06	1.1114e-06	8.5183e-06	0
867.571	1.5062e-05	5.9631e-06	9.3653e-06	1.0335e-05	1.0451e-05	6.497e-06	1.0576e-05	1.0235e-05	8.4509e-06	1.1411e-05	4.2353e-06	3.6843e-06	1.2855e-05	1.1624e-05	0
868.571	6.9254e-07	2.561e-06	5.0835e-06	8.9651e-06	1.8074e-05	4.6974e-06	1.281e-05	2.8099e-06	8.9332e-06	1.0388e-05	9.0903e-06	1.0672e-05	1.2572e-05	8.622e-06	0
869.57	1.3214e-05	1.0424e-05	8.9276e-06	1.9673e-05	1.2257e-05	4.3861e-06	1.7636e-05	1.6627e-05	1.2231e-05	6.3734e-06	1.2091e-05	6.1381e-06	1.6927e-05	8.7064e-06	0
870.57	7.8132e-06	5.2553e-06	1.3872e-05	1.0374e-05	1.635e-05	1.2226e-05	7.2683e-06	9.9015e-06	1.0165e-05	3.0454e-05	3.7761e-06	1.1055e-05	1.5117e-06	6.5203e-06	0
871.569	1.6594e-05	1.5818e-05	8.9508e-06	1.2753e-05	7.8471e-06	2.9866e-06	1.1484e-05	7.9767e-06	1.2728e-05	1.3815e-05	1.2216e-05	1.16e-05	8.6603e-06	8.4342e-06	0
872.569	2.1262e-05	1.6219e-05	1.4554e-05	1.6009e-05	1.489e-05	4.9254e-07	1.332e-05	2.013e-06	5.0775e-06	7.2003e-06	1.6359e-06	4.3418e-06	5.7622e-06	2.3684e-05	0
873.568	1.7261e-05	7.5595e-06	1.2458e-05	2.1511e-05	2.6308e-06	1.477e-05	1.2664e-06	1.4461e-05	1.1843e-05	1.0558e-05	2.531e-05	1.1179e-05	1.4484e-05	8.2095e-06	0
874.568	2.7368e-05	1.3892e-05	1.8912e-05	9.0733e-06	2.523e-06	1.5926e-05	5.1659e-06	6.5586e-06	1.3911e-05	9.8134e-06	1.1561e-05	1.0268e-05	1.0889e-05	8.1354e-07	0
875.567	2.0897e-05	1.0226e-05	1.598e-05	4.9341e-06	1.5812e-05	8.6934e-06	1.2491e-05	1.1199e-05	1.5914e-05	1.8391e-05	6.4165e-06	6.773e-06	2.1827e-05	1.0527e-05	0
876.567	5.7619e-06	1.0161e-05	2.0675e-05	9.0957e-06	1.1969e-05	1.9223e-05	1.5999e-05	8.2521e-06	5.4538e-06	3.8878e-06	7.062e-06	8.635e-06	1.482e-05	1.8041e-05	0
877.566	2.0174e-05	1.8433e-05	8.6597e-06	1.8941e-05	1.1518e-05	5.6225e-06	7.3079e-06	6.4675e-06	3.1048e-05	2.728e-05	3.8671e-06	3.9062e-06	5.895e-06	3.1188e-05	0
878.566	3.8937e-05	4.6644e-05	2.6042e-05	2.3668e-05	2.0927e-05	6.5434e-07	5.8622e-06	8.9856e-06	4.8842e-05	3.4347e-05	4.3736e-05	1.9741e-05	1.1558e-05	2.8485e-05	0
879.565	0.0001126	6.3633e-05	3.3119e-05	3.8514e-05	4.7053e-05	2.2203e-05	1.2819e-05	9.2234e-06	8.3431e-05	6.5936e-05	6.7429e-05	5.2293e-05	3.5283e-05	9.1025e-06	0
880.565	3.7515e-05	2.0821e-05	1.4422e-05	1.2847e-05	5.9898e-06	1.9757e-05	1.5808e-05	2.2979e-05	2.2846e-05	3.7655e-05	3.557e-05	9.3394e-06	1.4535e-05	5.5366e-06	0
881.565	3.1622e-05	1.6507e-05	1.2786e-05	2.0561e-05	8.9064e-06	8.7905e-06	1.6449e-05	9.3563e-06	1.9085e-05	1.937e-05	5.9473e-06	1.0141e-05	1.5511e-05	8.9013e-06	0
882.564	4.6143e-06	1.5385e-05	6.4603e-06	7.2673e-06	6.1675e-06	5.2618e-06	1.2297e-05	9.7441e-06	1.0592e-05	1.754e-05	1.131e-05	1.9142e-05	4.0163e-06	2.6901e-05	0
883.564	3.693e-05	8.3378e-06	1.5177e-05	5.6409e-06	1.1569e-05	7.2556e-06	1.3198e-05	9.6135e-06	1.1741e-05	3.893e-05	1.0227e-05	7.7016e-06	7.4307e-06	2.2398e-05	0
884.563	2.3406e-05	4.326e-06	1.1578e-05	1.4237e-05	8.8384e-06	1.4752e-05	7.1716e-06	1.0444e-05	1.4041e-05	1.5018e-05	1.3152e-05	5.8111e-06	2.0662e-05	8.1828e-06	0
885.563	1.2073e-05	1.5173e-05	1.4913e-05	6.7698e-06	1.9884e-05	7.5214e-06	8.3316e-06	1.1181e-05	3.3742e-06	2.3021e-05	5.2148e-06	1.331e-05	2.5614e-05	2.2191e-05	0
886.562	2.562e-05	1.9073e-05	5.659e-06	1.3097e-05	1.3061e-05	1.9701e-05	1.1571e-05	1.2009e-05	6.1991e-06	1.3366e-05	1.6532e-06	3.4897e-06	6.7816e-06	1.1586e-05	0
887.562	8.0891e-06	1.8702e-05	7.205e-06	2.4534e-05	8.8202e-06	1.1457e-05	5.9565e-06	9.3888e-06	1.5072e-06	1.1322e-05	1.368e-05	1.4747e-05	1.4974e-05	9.2065e-06	0
888.561	4.9574e-05	1.0335e-05	1.0325e-05	2.1267e-05	1.7321e-05	1.0132e-05	1.3599e-05	7.886e-06	1.7016e-05	1.1656e-05	2.3544e-06	1.0815e-05	1.9601e-05	3.9848e-06	0
889.561	4.3056e-06	6.8272e-06	1.4655e-05	2.2964e-05	1.5412e-05	1.0538e-05	1.3834e-05	1.3107e-05	1.0928e-06	1.5866e-05	1.8157e-05	1.4864e-05	1.6486e-05	2.453e-05	0
890.56	2.6498e-05	1.1778e-05	9.4908e-07	2.0353e-05	1.6032e-05	2.4963e-05	2.0835e-05	1.1601e-05	2.2109e-05	1.0019e-05	1.25e-05	9.3776e-06	1.2711e-05	6.5757e-06	0
891.56	1.1074e-05	3.7109e-06	8.716e-06	6.3462e-06	1.1007e-05	2.4763e-06	3.5258e-06	1.8036e-05	7.1866e-06	3.3943e-05	9.1653e-06	1.1204e-05	1.2135e-05	1.7331e-05	0
892.559	1.5657e-05	2.2091e-05	1.4122e-05	3.0544e-05	1.8145e-05	1.5068e-05	2.2331e-05	1.7635e-05	1.2689e-05	1.9626e-05	1.1946e-05	1.4551e-05	1.7363e-05	1.5984e-05	0
893.559	3.5963e-05	9.5286e-06	5.279e-06	1.4362e-05	5.3932e-06	2.1209e-05	9.1115e-06	1.6728e-05	1.211e-05	1.3366e-05	1.0352e-05	1.0273e-05	8.6051e-06	2.4974e-06	0
894.558	1.8057e-05	6.9989e-06	3.5456e-06	1.1585e-05	9.4072e-06	6.2271e-06	1.9828e-06	6.2733e-06	8.9893e-06	9.5035e-06	1.3472e-05	1.0535e-05	9.0382e-06	1.6727e-05	0
895.558	3.1179e-05	8.5338e-06	2.4151e-05	2.7684e-05	3.0768e-05	6.8419e-06	1.1523e-05	1.1902e-05	2.4707e-06	2.3183e-05	1.0288e-05	1.6468e-05	2.0741e-05	8.9468e-06	0
896.557	3.0695e-05	8.6898e-06	2.0095e-05	8.375e-06	2.0004e-05	2.4114e-05	1.1462e-05	4.9453e-06	1.8969e-05	2.142e-05	9.0708e-06	2.5228e-06	1.9729e-05	1.9922e-05	0
897.557	2.2703e-05	1.654e-05	1.7176e-05	6.2152e-06	1.3213e-05	3.2683e-06	7.962e-06	1.737e-05	4.1867e-06	1.4544e-05	6.0176e-06	7.3874e-06	1.4405e-06	2.5085e-05	0
898.556	2.4476e-05	1.4715e-05	2.3851e-05	1.3077e-05	1.9298e-05	1.0278e-05	3.1325e-05	5.6387e-06	2.2565e-05	1.4613e-05	6.9177e-06	1.0806e-05	5.5648e-06	5.2275e-06	0
899.556	3.5789e-05	5.9624e-06	1.1978e-05	1.0447e-05	1.6803e-05	2.2498e-05	5.7822e-06	8.3467e-06	1.3131e-05	2.4112e-05	1.0889e-05	1.7101e-05	2.3641e-05	2.0793e-05	0
900.555	2.5026e-05	4.2163e-06	1.406e-05	2.6304e-05	1.7045e-05	7.4152e-06	6.4821e-07	7.0413e-06	1.2113e-05	1.4766e-05	8.0108e-06	7.6282e-06	1.1955e-05	5.7088e-06	0
901.555	2.76e-05	9.2005e-06	1.9953e-05	4.6519e-05	2.5005e-06	1.1783e-05	2.725e-05	7.1663e-06	1.9446e-05	9.6807e-06	5.7356e-06	1.4406e-05	1.626e-05	1.1852e-05	0
902.554	2.3511e-06	1.029e-05	1.5785e-05	3.5835e-05	1.0577e-05	1.711e-05	9.1749e-06	8.381e-06	1.8878e-05	1.8473e-05	9.2608e-06	9.1467e-06	1.7808e-05	2.4149e-05	0
903.554	1.5017e-05	7.4973e-06	8.1833e-06	2.3972e-05	1.3373e-05	9.7506e-06	1.8267e-05	1.6996e-05	1.2862e-05	1.9746e-05	9.6657e-06	1.1408e-05	2.264e-05	2.677e-05	0
904.553	6.234e-06	3.9298e-06	2.173e-05	6.6338e-06	2.2542e-05	1.2523e-05	2.8706e-05	6.454e-06	9.7608e-06	2.9707e-05	1.4987e-05	2.4857e-05	8.2328e-06	1.7947e-05	0
905.553	5.4592e-06	3.9184e-06	5.6032e-06	1.8086e-05	1.6792e-05	5.2562e-06	4.738e-06	1.3839e-05	1.9597e-05	3.0647e-05	6.6792e-06	1.0642e-05	5.6211e-06	6.3244e-06	0
906.552	2.7662e-05	2.2577e-05	1.7346e-05	3.3338e-05	1.4195e-05	2.048e-05	8.7245e-06	8.002e-06	5.9088e-06	2.7252e-05	4.0412e-06	2.1465e-05	1.9082e-05	1.5818e-05	0
907.552	9.145e-06	1.4578e-05	2.1951e-05	1.322e-05	1.5891e-05	1.5455e-05	4.2348e-06	2.63e-05	1.278e-05	2.0499e-05	1.6255e-05	1.0142e-05	1.4735e-05	2.4732e-05	0
908.551	1.8939e-05	4.4044e-06	7.373e-06	1.739e-05	1.1709e-05	1.1386e-05	4.3611e-06	1.5801e-05	5.6921e-06	1.6819e-05	5.9207e-06	1.4445e-05	2.3966e-05	2.4901e-05	0
909.551	3.2689e-05	9.0474e-06	9.0004e-06	1.4766e-05	1.0224e-05	4.72e-06	1.8067e-05	8.2894e-06	7.7296e-06	3.2507e-05	5.6726e-06	1.7853e-06	1.0312e-05	2.0969e-05	0
910.55	3.1965e-05	2.8929e-05	2.1586e-05	2.2436e-05	5.8521e-06	2.6527e-05	7.8971e-06	6.2958e-06	9.1058e-06	3.267e-05	1.3721e-05	6.3342e-06	1.5065e-05	1.7175e-05	0
911.55	4.5342e-05	7.2293e-06	1.7473e-05	1.1144e-05	1.0015e-05	5.0704e-06	2.1886e-05	1.8371e-05	2.2137e-05	1.0648e-05	1.6208e-05	2.2202e-06	3.3832e-06	4.4684e-06	0
912.549	3.0496e-05	3.6567e-06	1.7049e-05	2.6489e-05	1.4533e-05	1.7432e-05	3.8412e-06	1.8454e-05	6.0435e-06	2.5821e-05	9.1493e-06	1.4928e-05	1.8123e-05	1.4177e-05	0
913.549	4.0696e-05	2.0853e-05	1.5241e-05	1.7677e-05	1.401e-05	1.9893e-05	5.7157e-06	1.3732e-05	2.7871e-05	1.2827e-05	8.9183e-06	1.4362e-05	3.1339e-05	1.9208e-05	0
914.548	1.4418e-05	1.7288e-05	1.3655e-05	1.6329e-05	1.7781e-05	1.32e-05	7.1592e-06	1.2981e-05	1.1006e-05	1.9931e-05	1.4817e-05	1.1768e-05	2.0092e-05	2.2626e-05	0
915.548	1.7823e-05	7.038e-06	1.0563e-05	5.204e-05	3.1078e-05	2.178e-05	1.3809e-05	8.2271e-06	1.4371e-05	2.8492e-05	1.2779e-05	4.2878e-06	2.0002e-05	1.8675e-05	0
916.547	3.3499e-05	1.2228e-05	8.5831e-06	7.289e-06	8.7497e-06	2.4125e-05	1.5084e-05	5.4603e-06	2.4728e-05	2.7511e-05	1.4304e-05	1.0242e-05	1.9609e-05	1.3548e-05	0
917.547	9.6418e-06	1.2492e-05	2.7094e-05	1.7969e-05	2.4912e-05	2.0179e-05	1.9828e-05	1.5861e-05	2.1573e-05	2.3671e-05	2.3522e-05	1.4246e-05	1.7172e-05	2.5338e-05	0
918.546	2.0719e-05	2.2258e-05	3.4653e-06	3.6963e-05	2.2513e-05	2.5606e-05	2.0463e-05	1.4905e-05	1.1089e-05	1.062e-05	1.9013e-05	1.8425e-05	4.054e-05	6.1643e-06	0
919.546	9.4501e-06	1.4814e-05	1.4375e-05	4.6567e-06	2.1655e-05	1.548e-05	2.367e-05	3.1539e-05	1.4462e-05	3.4405e-05	9.881e-06	1.8514e-05	2.0112e-05	2.2134e-05	0
920.545	3.9082e-05	1.6773e-05	1.9305e-05	1.7645e-05	3.3675e-05	3.3167e-05	1.7774e-05	1.4104e-05	7.6386e-06	2.3408e-05	8.7571e-06	2.0231e-05	6.2769e-06	1.1732e-05	0
921.545	2.0143e-06	1.7197e-05	3.6396e-05	4.6133e-05	1.722e-05	1.472e-05	1.1299e-05	2.9476e-05	1.5515e-05	1.7745e-05	2.8564e-05	2.2989e-05	1.3062e-05	2.2022e-05	0
922.544	3.5025e-05	5.0139e-06	2.316e-05	2.3959e-05	2.5366e-05	1.9158e-05	6.925e-06	1.434e-05	1.3684e-05	1.9543e-05	2.5629e-05	1.541e-05	7.3078e-06	5.3232e-06	0
923.544	7.0069e-05	2.634e-05	4.6321e-06	1.3634e-05	1.5399e-05	3.7396e-05	3.4276e-05	1.4028e-05	1.5565e-05	7.5615e-06	4.3582e-06	1.9754e-05	5.8033e-06	2.4317e-05	0
924.543	3.2182e-05	1.2906e-05	3.3269e-05	2.3592e-05	3.8567e-05	1.7459e-05	1.4646e-05	2.5122e-05	1.6936e-05	5.2406e-05	1.9486e-05	4.0773e-05	2.8734e-05	2.3672e-05	0
925.543	2.8649e-05	2.1594e-05	2.9879e-05	1.7931e-05	5.4904e-06	2.1553e-05	1.1664e-05	9.478e-06	3.5018e-05	5.2635e-05	2.9664e-05	2.5171e-05	9.5591e-06	1.3149e-05	0
926.542	3.6013e-05	9.275e-06	4.7041e-05	5.9452e-06	1.3647e-05	4.8241e-05	1.3749e-05	1.8156e-05	6.0098e-05	4.8716e-05	3.389e-05	4.7005e-05	2.1644e-05	3.3305e-05	0
927.542	0.00013804	9.1428e-05	7.3606e-05	2.9119e-05	8.1913e-05	9.0666e-05	3.3126e-05	1.1124e-05	0.00011603	0.00010425	0.00010163	4.1172e-05	3.7648e-05	2.9865e-05	0
928.541	4.3517e-05	1.8636e-05	2.7983e-05	4.4152e-05	3.3769e-05	4.4195e-05	2.6278e-05	1.5484e-05	1.295e-05	3.1269e-05	2.4085e-05	8.2667e-06	1.069e-05	1.7104e-05	0
929.541	2.1798e-05	2.4437e-05	1.4662e-05	3.0722e-05	2.9318e-05	6.8629e-06	6.6507e-06	1.304e-05	7.0764e-06	3.6262e-05	5.0777e-06	1.6223e-05	2.4202e-05	1.9047e-05	0
930.54	3.8227e-05	2.6999e-05	1.2995e-05	3.0752e-05	3.5832e-05	6.384e-06	1.6983e-05	1.7487e-05	1.5506e-05	3.8267e-05	2.6144e-05	3.3147e-05	1.1762e-05	4.8006e-05	0
931.54	5.7296e-05	1.4785e-05	3.7028e-05	2.3484e-05	3.0236e-05	3.8085e-05	1.395e-05	4.5586e-05	5.904e-06	4.6544e-05	1.3504e-05	1.26e-05	1.2899e-05	1.3572e-05	0
932.539	4.0203e-05	2.3424e-05	2.686e-05	1.3937e-05	2.2596e-05	9.6489e-06	1.1734e-05	1.1802e-05	2.2576e-05	1.232e-05	2.9335e-05	2.2959e-05	2.1532e-05	4.2914e-05	0
933.539	7.3481e-06	8.1784e-06	1.3972e-05	1.2113e-05	6.4905e-05	8.3464e-06	1.425e-05	1.262e-06	7.3025e-06	2.6113e-05	1.7993e-05	2.3394e-05	2.0591e-05	7.8823e-06	0
934.538	1.6528e-05	1.8606e-05	1.4978e-05	1.8134e-05	2.8383e-05	4.374e-06	2.636e-05	9.7079e-06	1.2394e-05	2.7387e-05	2.0134e-05	2.3187e-06	3.1357e-05	1.7241e-05	0
935.538	3.239e-05	1.8461e-05	3.3537e-05	3.7008e-05	1.1634e-05	3.8252e-05	5.8057e-06	2.4686e-05	1.4486e-05	5.1163e-05	2.6701e-05	7.6559e-06	5.0724e-06	2.5631e-05	0
936.537	1.366e-05	1.0035e-05	9.7692e-06	1.9775e-05	3.4518e-05	2.5323e-05	1.6862e-05	1.4659e-05	7.5268e-06	2.9703e-05	2.35e-05	8.2144e-06	1.1288e-05	2.1893e-05	0
937.537	3.1885e-05	1.7991e-05	1.1572e-05	4.1693e-05	2.5499e-05	5.3012e-06	3.0925e-06	4.9148e-06	2.5675e-05	1.7945e-05	8.9154e-06	2.4728e-05	2.3879e-05	1.9454e-05	0
938.536	1.5317e-05	2.0108e-05	4.7391e-05	1.5916e-05	3.1607e-05	9.4766e-06	1.5673e-05	1.4364e-05	1.2183e-05	3.8117e-05	1.1949e-05	9.3083e-06	2.307e-05	8.221e-06	0
939.536	3.1889e-05	2.0887e-05	1.025e-05	1.6546e-05	4.1676e-05	7.0234e-06	2.2562e-05	3.0118e-05	8.1097e-06	5.918e-06	1.8623e-05	1.7919e-05	1.933e-05	2.6632e-05	0
940.535	2.3262e-06	9.3832e-06	2.8316e-05	1.7258e-05	2.749e-05	2.2998e-05	2.5233e-05	1.9458e-05	2.5055e-05	3.0419e-05	1.3451e-05	9.6838e-06	3.0525e-05	3.26e-05	0
941.535	5.1175e-06	5.4422e-05	1.0619e-05	4.9658e-05	1.8593e-05	2.2558e-06	2.6195e-05	9.8872e-06	1.3924e-05	1.6111e-05	2.8212e-05	5.1786e-05	3.066e-05	1.3933e-05	0
942.534	1.9463e-05	2.0255e-05	1.2984e-05	1.9139e-05	2.7918e-05	1.734e-05	4.5226e-06	2.4251e-05	3.7241e-06	7.9086e-06	3.3703e-05	1.3698e-05	1.0817e-05	1.4339e-05	0
943.534	1.6073e-05	1.1207e-05	2.4598e-05	2.3996e-05	1.7172e-05	5.7029e-06	1.5165e-05	1.8152e-05	2.7106e-05	1.6178e-05	1.4316e-05	2.6284e-05	1.6842e-05	2.7227e-05	0
944.533	4.128e-06	1.3016e-05	2.5095e-05	7.9177e-05	2.3825e-05	1.7117e-05	4.7573e-06	7.486e-06	1.1281e-05	1.191e-05	3.543e-05	3.4465e-05	1.5943e-05	1.3664e-05	0
945.533	7.6115e-05	1.3256e-05	3.7068e-05	3.375e-05	1.6196e-05	1.0236e-05	1.1189e-05	1.5294e-05	1.0675e-05	5.5463e-05	2.5942e-05	2.4787e-05	1.2119e-05	1.9383e-05	0
946.532	4.5498e-05	2.8864e-05	8.5877e-06	6.6453e-06	5.7834e-06	1.7927e-05	2.4833e-05	2.503e-05	2.341e-05	5.9805e-06	8.6526e-06	1.2266e-05	3.7208e-05	2.7669e-05	0
947.532	2.3466e-05	2.9091e-05	2.1258e-05	2.8588e-05	5.1185e-06	5.0135e-05	3.0669e-05	1.5715e-05	2.2029e-05	3.7739e-05	2.5011e-05	3.2567e-05	3.3399e-05	2.5692e-05	0
948.531	6.7046e-05	1.5329e-05	6.1351e-06	2.2547e-05	2.5174e-05	5.6416e-06	4.6598e-06	3.0662e-05	2.3476e-05	6.0653e-05	3.4404e-05	2.9914e-05	3.1757e-05	1.9731e-05	0
949.531	5.9017e-05	1.8299e-05	1.853e-05	3.5982e-05	2.9738e-05	3.3483e-05	2.328e-05	3.837e-05	9.6975e-06	4.0548e-05	4.6961e-06	3.7029e-05	7.3809e-06	3.9616e-05	0
950.53	1.1495e-05	1.1389e-05	2.3449e-05	3.5815e-05	2.595e-05	1.3026e-05	3.1325e-05	2.4624e-05	6.7436e-06	2.3865e-05	4.7867e-05	2.2605e-05	3.406e-05	2.1252e-05	0
951.53	2.517e-05	1.118e-05	3.4339e-05	2.9287e-05	1.604e-05	2.6525e-05	2.2732e-05	3.9928e-05	2.241e-05	3.141e-05	3.2313e-05	1.6401e-05	5.8579e-06	2.2871e-05	0
952.529	1.6652e-05	1.5654e-05	1.6352e-05	1.5067e-05	4.1281e-05	2.1892e-05	1.8959e-05	4.9656e-05	1.2787e-05	3.4262e-05	2.163e-06	8.5213e-06	1.161e-05	1.0825e-05	0
953.529	4.4049e-05	1.9019e-05	3.3322e-05	2.136e-05	2.0076e-05	6.9957e-06	1.5502e-05	2.2825e-05	2.5726e-05	3.5515e-05	2.4955e-05	2.7036e-05	2.6918e-05	3.2196e-05	0
954.528	6.34e-05	1.16e-05	2.8827e-06	2.8069e-05	2.7377e-05	2.0463e-05	2.123e-06	4.3928e-06	2.3476e-05	1.4672e-05	1.0722e-05	4.16e-06	1.7436e-05	3.2973e-05	0
955.528	3.4887e-05	9.4627e-06	2.7277e-05	2.8516e-05	7.8066e-06	3.3566e-05	2.9953e-05	6.3176e-06	1.7962e-05	1.9408e-05	1.1733e-05	1.5353e-05	1.7307e-05	2.5893e-05	0
956.527	5.3629e-05	2.4467e-05	1.5662e-05	3.9106e-05	2.7718e-05	1.1608e-05	4.5388e-05	3.2184e-05	1.7506e-05	2.5418e-05	2.4688e-05	2.1815e-06	1.1869e-05	4.3111e-05	0
957.527	4.591e-05	6.0558e-05	3.1275e-05	7.1663e-05	7.7735e-06	1.8529e-05	1.2188e-05	1.6729e-05	3.5613e-05	1.458e-05	2.6361e-05	1.1351e-05	2.1639e-05	3.45e-05	0
958.526	9.9588e-06	4.1258e-05	3.6456e-05	7.3477e-05	1.8804e-05	1.5592e-05	3.5453e-05	1.3225e-05	2.7044e-05	4.0724e-05	1.1864e-05	3.2986e-05	2.902e-05	1.7224e-05	0
959.526	3.2294e-05	3.2027e-05	4.737e-05	4.6526e-05	2.3893e-05	1.4921e-05	1.833e-05	4.8897e-05	2.9543e-06	7.2568e-05	2.5136e-05	1.0973e-05	3.1368e-05	2.1071e-05	0
960.525	1.7944e-05	1.8976e-05	4.5059e-05	3.7709e-05	4.0699e-05	1.4983e-05	9.4892e-06	7.6786e-06	1.0326e-05	3.3223e-05	4.1238e-05	2.3877e-05	1.4628e-05	3.2212e-05	0
961.525	1.7169e-05	2.3878e-05	2.9742e-05	1.6626e-05	5.1847e-06	2.6666e-05	1.0684e-05	9.9626e-06	2.5441e-05	1.8616e-05	3.7098e-05	4.861e-05	2.5631e-05	3.1933e-05	0
962.525	2.7974e-05	1.3906e-05	2.4926e-05	5.1276e-05	9.4048e-06	3.3183e-05	6.1245e-05	1.7218e-05	1.6527e-05	2.6499e-05	1.944e-05	1.1359e-05	5.5987e-05	1.1418e-05	0
963.524	3.0865e-05	2.7371e-05	2.3061e-05	1.2188e-05	3.7325e-05	3.3556e-06	2.5207e-05	2.9673e-06	3.1209e-05	2.0823e-05	1.0835e-05	2.9618e-05	1.7154e-05	1.7698e-05	0
964.524	3.0882e-05	4.9334e-05	1.907e-05	3.7314e-05	2.9085e-05	1.0553e-05	1.5401e-05	1.3185e-05	1.4239e-05	5.6101e-06	1.1403e-05	2.6758e-05	3.7887e-05	4.1606e-05	0
965.523	4.8704e-05	2.1763e-05	2.2239e-05	1.798e-05	3.3313e-05	2.5236e-05	1.3156e-05	2.9005e-05	2.0519e-05	3.7037e-05	1.1085e-05	1.4373e-05	4.4127e-05	1.5957e-05	0
966.523	2.09e-05	1.4317e-05	1.9046e-05	4.0125e-05	2.6544e-05	6.3741e-06	1.8204e-05	1.3076e-05	1.0774e-05	2.6242e-05	3.1606e-05	2.9179e-05	7.8263e-05	1.4578e-05	0
967.522	6.7581e-05	5.1888e-06	2.3404e-05	4.2497e-05	2.4459e-05	3.1411e-05	1.8521e-05	1.9735e-05	1.5878e-05	5.5364e-05	4.4659e-06	1.1336e-05	2.9982e-05	2.9804e-05	0
968.522	4.714e-05	6.5592e-05	2.0875e-05	3.541e-05	2.4218e-05	3.4903e-05	8.4669e-06	3.5817e-05	2.6685e-05	2.8314e-05	3.7928e-05	4.9431e-05	1.8218e-05	4.1864e-05	0
969.521	5.8889e-06	2.383e-05	4.2042e-05	4.4489e-05	2.0502e-05	3.8092e-05	1.3146e-05	1.1105e-05	1.1393e-05	1.8877e-05	1.4429e-05	1.818e-05	3.0927e-05	3.8675e-05	0
970.521	4.4983e-05	2.0679e-05	1.0763e-05	3.5841e-05	1.7297e-05	2.3817e-05	2.5926e-05	2.2256e-05	3.8952e-05	5.4149e-05	3.3941e-05	9.2413e-06	2.0756e-05	4.5734e-05	0
971.52	3.1816e-05	1.6181e-05	2.9027e-05	1.1722e-05	3.9029e-05	1.2868e-05	1.9941e-05	4.9912e-05	2.6034e-05	2.5888e-05	4.6272e-06	2.0557e-05	2.4498e-05	2.0444e-05	0
972.52	5.8492e-05	5.8871e-05	3.8992e-05	2.7144e-05	1.3416e-05	1.312e-05	1.5345e-05	3.5835e-05	1.6562e-05	4.0787e-05	3.5939e-05	2.8191e-05	3.2175e-05	2.271e-05	0
973.519	0.00010694	0.00010298	1.8505e-05	8.3422e-05	5.2755e-05	3.8526e-05	2.8737e-05	2.4735e-05	0.00010632	3.3352e-05	7.221e-05	1.4474e-05	5.6539e-05	7.2033e-05	0
974.519	7.9896e-05	7.6006e-05	3.319e-05	6.446e-05	3.0619e-05	1.9816e-05	1.3955e-05	1.0819e-05	4.2553e-05	4.1873e-05	6.9133e-05	3.3254e-05	4.5272e-05	4.2086e-05	0
975.518	0.0010707	0.0003286	0.00016487	0.00020494	0.00017311	9.0154e-05	5.3526e-05	4.1072e-05	0.00034762	0.00032897	0.00020758	0.0002451	0.00030316	0.00022929	0
976.518	0.00010361	8.4951e-06	6.6391e-05	4.9428e-05	1.4442e-05	3.6102e-05	3.3388e-05	1.2165e-05	4.0639e-05	8.0176e-05	5.0661e-05	5.5556e-05	5.3847e-05	3.7211e-05	0
977.517	5.6003e-05	4.7987e-05	2.087e-05	2.1989e-05	3.8274e-05	1.2441e-05	4.9613e-05	2.1683e-05	1.8682e-05	2.5103e-05	3.7711e-05	2.7282e-05	1.9611e-05	2.2582e-05	0
978.517	4.7148e-05	1.9562e-05	6.8458e-06	5.8878e-05	2.0385e-05	1.6138e-05	2.1315e-05	2.2696e-05	9.3196e-06	3.9365e-05	5.4924e-05	2.4098e-05	1.1874e-05	5.1757e-05	0
979.516	4.2045e-05	4.4747e-05	4.0216e-05	7.0647e-05	9.1377e-06	7.298e-06	3.719e-05	2.1521e-05	2.4127e-05	4.0861e-05	4.0585e-05	2.0131e-05	2.4834e-05	2.4231e-05	0
980.516	3.3138e-05	5.2121e-05	2.3961e-05	2.1996e-05	1.2001e-05	3.2236e-05	3.412e-05	1.9665e-05	1.4311e-05	6.5149e-05	4.6584e-05	5.3684e-06	2.3832e-05	1.6846e-05	0
981.515	2.3562e-05	6.1617e-05	4.3187e-05	4.7277e-05	4.2905e-05	2.707e-05	1.082e-05	2.0465e-05	5.6406e-06	7.4858e-05	4.0952e-05	5.8653e-06	3.0752e-05	2.1219e-05	0
982.515	6.4304e-05	2.2893e-05	3.8728e-05	2.4161e-05	4.1882e-05	3.9516e-05	2.4106e-05	7.9326e-06	4.4939e-06	2.2978e-05	2.4051e-05	2.0614e-05	2.2305e-05	1.7411e-05	0
983.514	6.4754e-05	4.1645e-05	1.948e-05	6.5216e-05	1.6761e-05	2.4963e-05	3.2367e-05	3.2153e-05	3.3478e-05	9.375e-06	3.9488e-05	5.4238e-05	2.8033e-05	2.2283e-05	0
984.514	1.8536e-05	2.5139e-05	3.4978e-05	3.0115e-05	2.2457e-05	5.2354e-05	2.4303e-05	3.438e-05	1.9116e-05	8.2085e-06	1.6724e-05	3.2052e-05	2.0078e-05	3.612e-05	0
985.513	6.9352e-05	7.6094e-06	2.9e-05	2.0844e-05	3.1886e-05	4.4405e-06	1.7387e-05	8.2103e-06	1.04e-05	1.9492e-05	5.6742e-06	2.4705e-05	8.5722e-06	2.0388e-05	0
986.513	2.5239e-05	3.4473e-05	2.586e-05	4.0432e-05	3.8701e-05	2.3694e-05	1.723e-05	5.7696e-06	3.6751e-05	8.9358e-06	2.6645e-05	4.0998e-05	2.9415e-05	4.9681e-05	0
987.512	1.3131e-05	3.8946e-05	1.4496e-05	1.6935e-05	5.9422e-05	2.4696e-05	2.8192e-05	2.0431e-05	1.5952e-05	2.8556e-05	4.999e-05	3.4212e-05	1.7753e-05	4.6863e-06	0
988.512	7.8359e-05	3.7881e-05	8.9026e-06	4.5363e-05	0.00010293	5.2309e-05	1.8602e-05	6.7933e-06	3.0743e-05	2.3849e-05	2.8983e-05	3.0329e-05	2.8854e-05	1.8175e-05	0
989.511	4.1163e-05	3.3347e-05	5.0422e-05	9.868e-05	2.4156e-05	1.2686e-05	1.4708e-05	2.7754e-05	1.7507e-05	1.9427e-05	1.5243e-05	4.5105e-05	2.1768e-05	3.8357e-05	0
990.511	1.5002e-05	1.2649e-05	1.4986e-05	1.1395e-05	1.568e-05	3.6237e-05	1.9303e-05	1.2335e-05	1.6716e-05	5.0638e-05	1.8394e-05	1.8201e-05	3.6444e-05	8.6595e-06	0
991.51	1.2094e-05	3.1813e-05	1.6028e-05	4.2539e-05	2.3821e-05	2.123e-05	1.6822e-05	1.1982e-05	3.6275e-05	2.5843e-05	4.4193e-05	3.7525e-05	2.0744e-05	1.662e-05	0
992.51	3.2721e-05	2.8627e-05	2.9257e-05	2.928e-05	4.8313e-05	2.7118e-05	1.0282e-05	2.4486e-05	1.7164e-05	2.0467e-05	4.6929e-05	2.2635e-05	3.0136e-05	9.2495e-06	0
993.509	3.1938e-05	1.2493e-05	1.3793e-05	3.9513e-05	7.4382e-05	4.0943e-05	2.1214e-05	2.3733e-05	1.9321e-05	5.1252e-05	2.8702e-05	6.2333e-05	5.1475e-05	1.6277e-05	0
994.509	2.4808e-05	3.0523e-05	5.1252e-05	3.6221e-05	4.4387e-05	3.1526e-05	1.8183e-05	1.2809e-05	2.4918e-05	7.3238e-05	3.6253e-05	2.3251e-05	3.8432e-05	3.8835e-05	0
995.508	4.2494e-05	5.2854e-05	3.5349e-05	1.1078e-05	8.6683e-05	3.1284e-05	2.4897e-05	1.248e-05	2.7195e-05	1.906e-05	4.0709e-05	5.6478e-05	3.7393e-05	3.611e-06	0
996.508	4.0179e-05	8.4879e-06	4.5271e-06	1.8099e-05	2.4921e-05	3.7379e-05	1.3764e-05	2.1463e-05	3.1967e-05	4.1884e-05	2.5838e-05	2.8568e-05	7.4059e-05	2.3773e-05	0
997.507	2.9638e-05	6.7753e-05	4.259e-05	1.3575e-05	6.4835e-05	4.9445e-05	4.2409e-05	2.0338e-05	3.9595e-05	3.9812e-05	2.4747e-05	1.3644e-05	4.5955e-05	2.0389e-05	0
998.507	3.6787e-05	5.1903e-05	3.1179e-05	2.9304e-05	6.3755e-05	2.533e-05	1.4268e-05	4.1901e-05	5.5542e-05	2.8086e-05	2.5352e-05	2.8452e-06	5.7388e-05	3.9181e-05	0
999.506	7.9951e-05	5.8645e-05	3.6848e-05	1.0257e-05	5.858e-05	4.4205e-05	4.5917e-05	2.4844e-05	2.8993e-05	4.7694e-05	8.2988e-05	3.3279e-05	4.9431e-05	1.9387e-05	0
1000.51	2.878e-05	1.7989e-05	2.5656e-05	3.2281e-05	3.2986e-05	4.5235e-05	9.6042e-06	1.5799e-05	6.6786e-05	3.3816e-05	9.1665e-05	5.0891e-05	8.5979e-05	3.9041e-05	0
1001.51	2.2499e-05	4.8865e-05	5.0657e-05	2.2017e-05	2.8128e-05	1.6651e-05	3.7259e-05	2.9645e-06	6.8696e-05	5.4532e-05	5.123e-05	2.0036e-05	7.968e-06	1.2053e-05	0
1002.5	3.4047e-05	3.5356e-05	6.8125e-06	2.1659e-05	6.978e-05	1.8806e-05	3.2195e-05	1.6219e-05	4.4542e-05	6.0471e-05	6.0385e-05	7.6539e-06	2.8084e-05	1.1479e-06	0
1003.5	5.459e-06	2.7319e-05	1.3111e-05	3.8579e-05	9.7448e-05	1.2802e-05	2.6023e-05	2.0776e-05	5.7485e-05	2.5364e-05	3.2031e-05	1.3365e-05	5.9754e-05	2.5326e-05	0
1004.5	6.5826e-05	8.8171e-05	3.755e-05	3.9667e-05	2.3857e-05	4.7664e-06	5.8305e-05	1.8516e-05	3.6961e-05	7.8573e-05	5.1826e-05	1.8643e-05	8.7807e-05	5.1778e-05	0
1005.5	2.7143e-05	0.00010224	3.5232e-05	3.8236e-05	4.8571e-05	5.7483e-05	1.7444e-05	3.2385e-05	5.5426e-05	6.8822e-05	0.00020098	4.0299e-05	0.00012306	3.7998e-05	0
1006.5	9.0567e-05	0.00010842	5.2956e-05	5.3708e-05	6.6447e-05	1.0405e-05	3.0118e-05	4.7997e-05	6.2316e-05	4.0881e-05	2.8654e-05	3.786e-05	3.232e-05	1.9769e-05	0
1007.5	1.0804e-05	9.7325e-05	2.8245e-05	7.815e-05	7.0164e-05	5.4558e-05	4.8137e-05	1.7955e-05	0.00015639	9.5811e-05	0.00021931	2.7132e-05	0.00012121	3.9508e-05	0
1008.5	9.2067e-05	0.00010352	2.4064e-05	4.723e-05	6.497e-05	9.7364e-05	4.906e-05	1.4988e-05	0.00010363	4.1058e-05	6.0058e-05	3.4491e-05	0.00013349	6.4508e-05	0
1009.5	5.0569e-05	0.0001445	1.8337e-05	0.00013686	9.6514e-05	2.9415e-05	7.1953e-05	2.1889e-05	7.0699e-05	0.00011403	5.8143e-05	2.1106e-05	0.00017061	2.623e-05	0
1010.5	8.8278e-05	0.0001172	9.0873e-05	7.6756e-05	0.00024139	4.6952e-05	1.5572e-05	7.4898e-05	0.00010593	0.00011743	0.00018495	2.0302e-05	0.00024402	4.2753e-05	0
1011.5	0.00012917	0.00016705	6.001e-05	5.5953e-05	1.4415e-05	6.3716e-05	7.1121e-05	2.291e-05	0.000149	0.00022425	5.0853e-05	0.00012204	0.00014065	2.8694e-05	0
1012.5	0.00023462	0.00013552	3.6215e-05	5.4753e-05	8.6622e-05	0.00015041	0.00010091	5.5285e-05	7.7756e-05	2.6176e-05	0.00032934	6.6955e-05	0.00018776	2.3684e-05	0
1013.5	7.3663e-05	0.00013216	7.9496e-05	0.0002234	0.00010534	9.7396e-05	9.8313e-05	4.8158e-05	8.5062e-05	0.00010681	7.4959e-05	6.2506e-05	0.00022568	6.7399e-05	0
1014.5	3.1597e-05	0.00017584	9.8826e-05	0.000156	8.5741e-05	0.00023359	0.00016516	7.5428e-05	6.4748e-05	0.00033405	0.00026905	8.7307e-05	0.00021135	8.9063e-05	0
1015.5	0.00019269	9.383e-05	0.0002672	2.8059e-05	0.00015254	7.7024e-05	0.00015927	0.00010995	8.906e-05	0.00015615	0.00031412	0.00028571	0.00044549	0.00012902	0
1016.5	0.00036669	0.00042089	0.00016578	0.00012991	0.00041072	0.00022713	0.00013411	5.791e-05	0.0005393	0.00042844	0.0004083	0.00015265	0.00040768	3.823e-05	0
1017.5	0.00016267	0.00016997	6.6101e-05	0.00019076	0.00011163	9.876e-05	6.0873e-05	0.00015415	0.0005842	0.00042199	0.0003341	0.00026141	0.00043997	6.5596e-05	0
1018.5	8.7386e-05	0.00021808	0.00029141	0.0001953	0.00029751	0.00032281	0.00017661	0.00015964	0.00041763	0.00031513	0.00055988	0.00020046	0.00092794	8.8065e-05	0
1019.5	0.00015527	0.00092454	0.00021502	0.00028492	0.0010128	0.00025802	9.5608e-05	0.0001748	0.00083391	0.0012009	0.00063181	0.00056971	0.0005657	0.00010098	0
1020.5	0.00090606	0.00027707	9.1882e-05	0.00021503	0.00078806	0.00048256	0.00019651	0.00026532	0.00086497	0.00080306	0.00042118	0.00033871	0.00092091	0.00038104	0
1021.5	0.0004148	0.00126	0.00019506	0.00019624	0.00099939	0.00083325	0.00018089	0.00020933	0.0012221	0.0012666	0.00014917	0.00077312	0.0024655	0.0005111	0
1022.49	0.00033103	0.0029292	0.00070806	0.00049588	0.0042079	0.00071072	0.0006983	0.00073696	0.0025304	0.001634	0.0023832	0.0015521	0.0027446	0.0010747	0
	0
	0.999506
	1.99901
	2.99852
	3.99803
	4.99753
	5.99704
	6.99654
	7.99605
	8.99556
	9.99506
	10.9946
	11.9941
	12.9936
	13.9931
	14.9926
	15.9921
	16.9916
	17.9911
	18.9906
	19.9901
	20.9896
	21.9891
	22.9886
	23.9882
	24.9877
	25.9872
	26.9867
	27.9862
	28.9857
	29.9852
	30.9847
	31.9842
	32.9837
	33.9832
	34.9827
	35.9822
	36.9817
	37.9812
	38.9807
	39.9802
	40.9798
	41.9793
	42.9788
	43.9783
	44.9778
	45.9773
	46.9768
	47.9763
	48.9758
	49.9753
	50.9748
	51.9743
	52.9738
	53.9733
	54.9728
	55.9723
	56.9719
	57.9714
	58.9709
	59.9704
	60.9699
	61.9694
	62.9689
	63.9684
	64.9679
	65.9674
	66.9669
	67.9664
	68.9659
	69.9654
	70.9649
	71.9644
	72.964
	73.9635
	74.963
	75.9625
	76.962
	77.9615
	78.961
	79.9605
	80.96
	81.9595
	82.959
	83.9585
	84.958
	85.9575
	86.957
	87.9565
	88.9561
	89.9556
	90.9551
	91.9546
	92.9541
	93.9536
	94.9531
	95.9526
	96.9521
	97.9516
	98.9511
	99.9506
	100.95
	101.95
	102.949
	103.949
	104.948
	105.948
	106.947
	107.947
	108.946
	109.946
	110.945
	111.945
	112.944
	113.944
	114.943
	115.943
	116.942
	117.942
	118.941
	119.941
	120.94
	121.94
	122.939
	123.939
	124.938
	125.938
	126.937
	127.937
	128.936
	129.936
	130.935
	131.935
	132.934
	133.934
	134.933
	135.933
	136.932
	137.932
	138.931
	139.931
	140.93
	141.93
	142.929
	143.929
	144.928
	145.928
	146.927
	147.927
	148.926
	149.926
	150.925
	151.925
	152.924
	153.924
	154.923
	155.923
	156.922
	157.922
	158.921
	159.921
	160.921
	161.92
	162.92
	163.919
	164.919
	165.918
	166.918
	167.917
	168.917
	169.916
	170.916
	171.915
	172.915
	173.914
	174.914
	175.913
	176.913
	177.912
	178.912
	179.911
	180.911
	181.91
	182.91
	183.909
	184.909
	185.908
	186.908
	187.907
	188.907
	189.906
	190.906
	191.905
	192.905
	193.904
	194.904
	195.903
	196.903
	197.902
	198.902
	199.901
	200.901
	201.9
	202.9
	203.899
	204.899
	205.898
	206.898
	207.897
	208.897
	209.896
	210.896
	211.895
	212.895
	213.894
	214.894
	215.893
	216.893
	217.892
	218.892
	219.891
	220.891
	221.89
	222.89
	223.889
	224.889
	225.888
	226.888
	227.887
	228.887
	229.886
	230.886
	231.885
	232.885
	233.884
	234.884
	235.883
	236.883
	237.882
	238.882
	239.881
	240.881
	241.881
	242.88
	243.88
	244.879
	245.879
	246.878
	247.878
	248.877
	249.877
	250.876
	251.876
	252.875
	253.875
	254.874
	255.874
	256.873
	257.873
	258.872
	259.872
	260.871
	261.871
	262.87
	263.87
	264.869
	265.869
	266.868
	267.868
	268.867
	269.867
	270.866
	271.866
	272.865
	273.865
	274.864
	275.864
	276.863
	277.863
	278.862
	279.862
	280.861
	281.861
	282.86
	283.86
	284.859
	285.859
	286.858
	287.858
	288.857
	289.857
	290.856
	291.856
	292.855
	293.855
	294.854
	295.854
	296.853
	297.853
	298.852
	299.852
	300.851
	301.851
	302.85
	303.85
	304.849
	305.849
	306.848
	307.848
	308.847
	309.847
	310.846
	311.846
	312.845
	313.845
	314.844
	315.844
	316.843
	317.843
	318.842
	319.842
	320.841
	321.841
	322.841
	323.84
	324.84
	325.839
	326.839
	327.838
	328.838
	329.837
	330.837
	331.836
	332.836
	333.835
	334.835
	335.834
	336.834
	337.833
	338.833
	339.832
	340.832
	341.831
	342.831
	343.83
	344.83
	345.829
	346.829
	347.828
	348.828
	349.827
	350.827
	351.826
	352.826
	353.825
	354.825
	355.824
	356.824
	357.823
	358.823
	359.822
	360.822
	361.821
	362.821
	363.82
	364.82
	365.819
	366.819
	367.818
	368.818
	369.817
	370.817
	371.816
	372.816
	373.815
	374.815
	375.814
	376.814
	377.813
	378.813
	379.812
	380.812
	381.811
	382.811
	383.81
	384.81
	385.809
	386.809
	387.808
	388.808
	389.807
	390.807
	391.806
	392.806
	393.805
	394.805
	395.804
	396.804
	397.803
	398.803
	399.803
	400.802
	401.802
	402.801
	403.801
	404.8
	405.8
	406.799
	407.799
	408.798
	409.798
	410.797
	411.797
	412.796
	413.796
	414.795
	415.795
	416.794
	417.794
	418.793
	419.793
	420.792
	421.792
	422.791
	423.791
	424.79
	425.79
	426.789
	427.789
	428.788
	429.788
	430.787
	431.787
	432.786
	433.786
	434.785
	435.785
	436.784
	437.784
	438.783
	439.783
	440.782
	441.782
	442.781
	443.781
	444.78
	445.78
	446.779
	447.779
	448.778
	449.778
	450.777
	451.777
	452.776
	453.776
	454.775
	455.775
	456.774
	457.774
	458.773
	459.773
	460.772
	461.772
	462.771
	463.771
	464.77
	465.77
	466.769
	467.769
	468.768
	469.768
	470.767
	471.767
	472.766
	473.766
	474.765
	475.765
	476.764
	477.764
	478.763
	479.763
	480.762
	481.762
	482.762
	483.761
	484.761
	485.76
	486.76
	487.759
	488.759
	489.758
	490.758
	491.757
	492.757
	493.756
	494.756
	495.755
	496.755
	497.754
	498.754
	499.753
	500.753
	501.752
	502.752
	503.751
	504.751
	505.75
	506.75
	507.749
	508.749
	509.748
	510.748
	511.747
	512.747
	513.746
	514.746
	515.745
	516.745
	517.744
	518.744
	519.743
	520.743
	521.742
	522.742
	523.741
	524.741
	525.74
	526.74
	527.739
	528.739
	529.738
	530.738
	531.737
	532.737
	533.736
	534.736
	535.735
	536.735
	537.734
	538.734
	539.733
	540.733
	541.732
	542.732
	543.731
	544.731
	545.73
	546.73
	547.729
	548.729
	549.728
	550.728
	551.727
	552.727
	553.726
	554.726
	555.725
	556.725
	557.724
	558.724
	559.723
	560.723
	561.723
	562.722
	563.722
	564.721
	565.721
	566.72
	567.72
	568.719
	569.719
	570.718
	571.718
	572.717
	573.717
	574.716
	575.716
	576.715
	577.715
	578.714
	579.714
	580.713
	581.713
	582.712
	583.712
	584.711
	585.711
	586.71
	587.71
	588.709
	589.709
	590.708
	591.708
	592.707
	593.707
	594.706
	595.706
	596.705
	597.705
	598.704
	599.704
	600.703
	601.703
	602.702
	603.702
	604.701
	605.701
	606.7
	607.7
	608.699
	609.699
	610.698
	611.698
	612.697
	613.697
	614.696
	615.696
	616.695
	617.695
	618.694
	619.694
	620.693
	621.693
	622.692
	623.692
	624.691
	625.691
	626.69
	627.69
	628.689
	629.689
	630.688
	631.688
	632.687
	633.687
	634.686
	635.686
	636.685
	637.685
	638.684
	639.684
	640.683
	641.683
	642.683
	643.682
	644.682
	645.681
	646.681
	647.68
	648.68
	649.679
	650.679
	651.678
	652.678
	653.677
	654.677
	655.676
	656.676
	657.675
	658.675
	659.674
	660.674
	661.673
	662.673
	663.672
	664.672
	665.671
	666.671
	667.67
	668.67
	669.669
	670.669
	671.668
	672.668
	673.667
	674.667
	675.666
	676.666
	677.665
	678.665
	679.664
	680.664
	681.663
	682.663
	683.662
	684.662
	685.661
	686.661
	687.66
	688.66
	689.659
	690.659
	691.658
	692.658
	693.657
	694.657
	695.656
	696.656
	697.655
	698.655
	699.654
	700.654
	701.653
	702.653
	703.652
	704.652
	705.651
	706.651
	707.65
	708.65
	709.649
	710.649
	711.648
	712.648
	713.647
	714.647
	715.646
	716.646
	717.645
	718.645
	719.644
	720.644
	721.644
	722.643
	723.643
	724.642
	725.642
	726.641
	727.641
	728.64
	729.64
	730.639
	731.639
	732.638
	733.638
	734.637
	735.637
	736.636
	737.636
	738.635
	739.635
	740.634
	741.634
	742.633
	743.633
	744.632
	745.632
	746.631
	747.631
	748.63
	749.63
	750.629
	751.629
	752.628
	753.628
	754.627
	755.627
	756.626
	757.626
	758.625
	759.625
	760.624
	761.624
	762.623
	763.623
	764.622
	765.622
	766.621
	767.621
	768.62
	769.62
	770.619
	771.619
	772.618
	773.618
	774.617
	775.617
	776.616
	777.616
	778.615
	779.615
	780.614
	781.614
	782.613
	783.613
	784.612
	785.612
	786.611
	787.611
	788.61
	789.61
	790.609
	791.609
	792.608
	793.608
	794.607
	795.607
	796.606
	797.606
	798.605
	799.605
	800.605
	801.604
	802.604
	803.603
	804.603
	805.602
	806.602
	807.601
	808.601
	809.6
	810.6
	811.599
	812.599
	813.598
	814.598
	815.597
	816.597
	817.596
	818.596
	819.595
	820.595
	821.594
	822.594
	823.593
	824.593
	825.592
	826.592
	827.591
	828.591
	829.59
	830.59
	831.589
	832.589
	833.588
	834.588
	835.587
	836.587
	837.586
	838.586
	839.585
	840.585
	841.584
	842.584
	843.583
	844.583
	845.582
	846.582
	847.581
	848.581
	849.58
	850.58
	851.579
	852.579
	853.578
	854.578
	855.577
	856.577
	857.576
	858.576
	859.575
	860.575
	861.574
	862.574
	863.573
	864.573
	865.572
	866.572
	867.571
	868.571
	869.57
	870.57
	871.569
	872.569
	873.568
	874.568
	875.567
	876.567
	877.566
	878.566
	879.565
	880.565
	881.565
	882.564
	883.564
	884.563
	885.563
	886.562
	887.562
	888.561
	889.561
	890.56
	891.56
	892.559
	893.559
	894.558
	895.558
	896.557
	897.557
	898.556
	899.556
	900.555
	901.555
	902.554
	903.554
	904.553
	905.553
	906.552
	907.552
	908.551
	909.551
	910.55
	911.55
	912.549
	913.549
	914.548
	915.548
	916.547
	917.547
	918.546
	919.546
	920.545
	921.545
	922.544
	923.544
	924.543
	925.543
	926.542
	927.542
	928.541
	929.541
	930.54
	931.54
	932.539
	933.539
	934.538
	935.538
	936.537
	937.537
	938.536
	939.536
	940.535
	941.535
	942.534
	943.534
	944.533
	945.533
	946.532
	947.532
	948.531
	949.531
	950.53
	951.53
	952.529
	953.529
	954.528
	955.528
	956.527
	957.527
	958.526
	959.526
	960.525
	961.525
	962.525
	963.524
	964.524
	965.523
	966.523
	967.522
	968.522
	969.521
	970.521
	971.52
	972.52
	973.519
[truncated: 81 more rows]

## Sheet: L48_phase
response freq\stimulus size	FF	70	60	50	40	30	20	10	AN10	AN20	AN30	AN40	AN50	AN60
0	180	0	0	0	180	0	0	180	0	0	0	0	180	0	0
0.999506	-59.162	144.628	39.7325	-18.6429	-11.7503	24.7091	-110.068	61.0155	159.249	-122.056	-159.822	-40.0223	-179.56	-39.9254	0
1.99901	170.121	4.45285	85.3175	-16.8008	-123.149	-113.402	-82.2144	121.338	65.4629	-44.1876	5.10614	159.849	111.399	-15.3551	0
2.99852	124.066	15.9556	95.5744	20.075	-58.2576	-82.3202	-129.593	171.619	25.8902	0.0737031	-176.249	-163.614	164.624	83.1353	0
3.99803	28.6824	-150.291	92.0504	-143.214	-74.2617	-83.9038	17.7181	127.909	140.359	-63.3475	5.26263	-179.921	155.579	-51.3681	0
4.99753	-6.74616	-145.628	48.0637	54.6725	-119.782	12.844	70.2909	-105.408	151.895	1.63402	142.423	45.1077	161.639	136.418	0
5.99704	83.5481	-26.6633	-151.285	-34.9588	-122.11	49.4888	-41.8147	-39.3009	126.656	77.9039	-132.151	34.5159	36.7657	-122.307	0
6.99654	52.2869	98.1407	-21.1303	9.36066	142.219	94.9923	-130.172	33.6906	-35.6437	-81.928	-0.446729	-122.478	39.9804	148.714	0
7.99605	-111.433	-13.2279	129.641	-92.7478	-68.709	28.0614	-28.7389	171.178	15.7918	9.67537	-43.2285	-134.486	19.8623	-154.549	0
8.99556	174.875	-47.7532	64.5948	124.51	-176.358	-23.0754	-86.3392	-116.602	153.559	-37.1845	-63.0765	30.5303	-167.749	-156.809	0
9.99506	-120.411	68.463	157.584	-72.2052	-87.1298	-159.693	158.067	156.451	-111.061	-54.0789	45.7833	-44.0736	174.647	76.0796	0
10.9946	134.202	-149.612	81.9276	-59.8947	3.99856	168.166	104.174	-174.38	-143.759	-97.453	119.359	131.686	-102.319	-48.0457	0
11.9941	128.998	-49.4297	150.964	-4.145	69.9407	-2.84134	-174.466	-40.8617	-148.811	55.1882	-90.7206	122.915	66.2173	-6.67772	0
12.9936	151.569	18.4359	155.216	67.2974	-59.3062	-143.024	5.8767	31.5915	83.707	-11.6591	24.3541	-160.433	123.049	-30.7975	0
13.9931	146.724	14.6521	-71.5762	157.89	-90.7127	-20.9642	129.954	24.9829	-43.8858	-134.163	162.846	100.735	-169.393	46.2786	0
14.9926	89.2716	-37.812	-178.985	-68.7756	17.4397	59.9922	108.043	117.946	93.9078	-143.793	21.4733	-118.334	72.1436	156.083	0
15.9921	-48.9345	-86.3893	-28.5239	165.671	-164.967	-167.965	139.529	132.091	15.1122	-93.1499	146.134	39.3945	-148.175	139.493	0
16.9916	91.6741	-102.319	-101.537	43.5965	-66.8784	-95.8963	173.123	17.6047	18.258	89.4918	178.51	-120.01	133.242	-161.431	0
17.9911	-75.551	6.41425	73.6508	105.767	-69.6774	-122.853	-164.73	-109.1	-44.584	65.1118	100.4	-49.3731	97.9712	112.249	0
18.9906	98.4173	28.8353	-112.233	85.9269	-4.65876	-50.8474	-43.172	-129.714	-50.6495	144.73	140.951	171.706	62.8167	-12.0571	0
19.9901	-145.255	-84.9834	102.35	-44.9875	-121.376	-148.298	-160.567	147.607	123.722	98.6505	-164.993	66.2317	105.255	-3.29879	0
20.9896	26.5622	102.944	-95.6599	133.783	-99.9052	-3.60472	17.7327	130.92	59.0392	-153.007	-12.3419	-105.46	134.536	15.8454	0
21.9891	57.6471	-94.5489	91.6623	-63.5129	-17.6203	23.2556	114.854	40.0727	46.2565	-83.9429	118.917	94.7425	89.2153	-81.1622	0
22.9886	-156.991	96.2972	151.118	-93.4812	33.4371	49.4472	-89.182	31.9507	150.129	-117.557	148.387	53.0757	66.8191	126.455	0
23.9882	-171.123	-151.342	21.4095	85.0617	-148.526	-135.637	102.238	58.1561	-157.376	85.1271	-110.005	2.25827	3.28085	-134.094	0
24.9877	55.6616	-75.1321	-16.9285	-11.2165	5.02574	-86.0973	-141.412	96.5496	20.8579	-83.1214	-12.5271	-108.869	102.77	86.6315	0
25.9872	-59.3135	-9.72482	90.6196	-178.621	-102.4	138.469	-115.512	-113.786	-11.3239	-47.5294	35.9899	152.251	79.6696	-166.87	0
26.9867	142.6	-20.0813	-36.0149	-148.981	-119.709	16.0088	108.13	155.942	99.9978	174.99	-56.7652	162.242	124.853	-68.4392	0
27.9862	148.387	-19.0492	120.783	-126.395	-16.5917	94.277	90.3627	0.139969	-49.0255	105.315	41.6853	-140.439	172.819	-90.0487	0
28.9857	-55.2138	92.085	-158.273	96.501	-108.806	-92.729	-167.744	86.8451	-153.257	-151.815	164.487	131.837	71.7949	-147.36	0
29.9852	174.214	-82.7742	-23.5413	-178.95	-101.905	-124.555	78.4058	-54.7463	111.056	-171.29	49.2167	157.23	90.807	156.239	0
30.9847	-33.8048	-115.176	39.1952	88.885	-76.8414	-33.9969	-26.8142	44.3633	48.7136	51.2627	128.883	82.8391	93.6895	-15.5389	0
31.9842	-118.117	-79.2547	71.8995	4.70435	20.3298	-156.703	20.6638	77.4723	127.509	1.04411	1.09577	72.6467	9.62683	165.765	0
32.9837	146.868	-49.0355	-36.6743	153.669	-68.5683	-129.325	-107.788	-11.5925	20.5164	78.6851	156.1	-104.779	155.991	33.8385	0
33.9832	-10.7802	-67.3361	93.4223	87.9218	-110.166	-135.373	-71.7233	114.274	175.756	128.919	-165.16	-40.3159	-4.13513	115.642	0
34.9827	132.698	-93.8315	130.251	106.175	-113.917	-107.634	-116.281	124.168	60.7286	6.16919	-174.112	-141.228	142.886	-156.402	0
35.9822	-113.723	-60.9905	-101.241	68.1899	-102.935	49.3697	-47.8909	-137.514	99.3229	100.772	172.839	136.723	2.70481	-163.745	0		Black	first try	Jacob_Mellina_20130507_1102_L48.csv
36.9817	111.063	114.357	143.556	137.573	-53.853	-81.3834	119.383	-87.022	47.7212	1.41276	-138.905	118.499	15.8759	-122.584	0		Red	second try	Jacob_Mellina_20130522_1233_L48_2.csv
37.9812	-82.7413	-126.514	-169.882	-145.568	-127.447	-15.1164	68.7438	-43.5701	129.189	174.072	26.5942	38.3988	58.0186	-134.863	0		Blue	fourth try	Jacob_Mellina_20130523_1213_L48_4.scv
38.9807	-107.955	-64.2867	34.684	111.636	-21.207	-2.91106	-146.36	19.2204	-143.044	31.0649	-178.007	-96.8739	84.8736	60.0245	0		Purple	fifth try	Jacob_Mellina_20130523_1305_L48_5.csv
39.9802	-157.516	118.059	39.0369	-47.3372	24.4426	-100.981	-111.145	-155.123	-102.632	-102.848	-114.318	-74.2281	152.524	114.542	0
40.9798	161.099	-103.374	-83.0849	98.9347	-61.6692	-12.7682	12.7502	-95.1875	53.2321	-53.8699	169.555	-34.132	135.578	15.997	0
41.9793	-114.531	-42.6511	-154.153	-15.9546	-64.0545	42.6373	-66.4951	-112.909	175.652	173.265	144.581	-154.079	82.7959	15.2697	0
42.9788	-90.0672	-47.5911	-72.8116	-33.5285	-69.4791	37.2696	-151.792	24.984	-37.8639	-79.9516	-25.9073	15.8128	133.921	-36.1122	0
43.9783	-136.402	-14.256	163.587	-131.915	45.5462	167.571	91.3311	-63.2305	157.72	19.6826	7.52029	152.668	32.0257	22.803	0
44.9778	22.0439	-129.273	89.8812	94.3512	-121.176	162.492	39.8128	0.941413	50.6962	-126.128	92.2123	-76.1384	30.8874	-153.077	0
45.9773	-90.7732	-71.0805	-101.481	-24.5574	-101.574	31.6489	-139.372	-3.34004	94.7922	-146.854	-75.6464	55.3191	154.171	85.606	0
46.9768	-105.567	-164.357	-81.0423	-122.629	-76.2605	-78.3882	-126.753	-138.513	-137.423	-142.395	176.868	-68.0717	-158.418	170.548	0
47.9763	-99.131	-104.204	-104.126	-96.076	-107.647	-36.0604	-129.513	-85.8769	-89.7592	-99.3511	-83.1085	-90.0728	-107.766	-115.389	0
48.9758	90.447	70.7689	130.304	134.71	33.8702	-142.759	157.718	11.5355	87.3622	61.4664	119.031	-179.302	82.2657	28.294	0
49.9753	86.719	63.7055	-42.8867	56.3644	102.122	-13.5962	179.773	-166.137	63.8477	74.0046	123.809	-12.8106	103.404	129.853	0
50.9748	84.3877	6.09091	-175.783	49.4347	-145.845	9.25868	66.8306	-133.265	111.056	86.3517	118.179	-178.845	58.1264	-38.2434	0
51.9743	15.731	20.6881	35.3486	-136.597	-177.868	-60.6625	-21.9234	-34.7815	132.79	-93.8436	169.736	159.632	46.445	0.425745	0
52.9738	155.087	93.8635	-137.611	126.288	-133.387	26.7668	-150.518	146.218	94.7479	46.3057	-27.3497	-117.779	140.138	32.2654	0
53.9733	45.9627	-39.7413	-71.091	99.3096	-128.813	137.695	-166.68	97.3816	178.653	131.251	-163.433	170.774	79.0083	69.0259	0
54.9728	151.391	65.4335	92.0079	44.9605	-16.0962	104.082	2.88934	-74.0887	85.8186	106.962	-119.042	84.6498	-5.82324	-70.3779	0
55.9723	60.1172	-38.0596	113.377	-128.82	40.8848	2.02159	8.45218	47.266	85.7494	34.4067	-108.249	17.9981	136.669	124.998	0
56.9719	60.0906	94.1302	128.871	-85.797	-51.2105	-58.3934	-28.0311	8.23269	49.8349	149.328	-133.725	-45.3633	112.025	-4.35305	0
57.9714	-165.741	129.157	58.3399	-26.0171	-121.761	-93.9882	108.598	-103.991	140.991	-149.538	-23.6754	-112.097	92.5137	-93.9116	0
58.9709	89.9395	-76.5963	29.1223	-140.008	-152.374	33.0358	-166.742	101.272	-137.285	88.3538	-110.256	49.0983	44.2873	-6.58579	0
59.9704	5.22728	-164.309	58.3193	-145.566	-66.111	-3.45939	-0.840835	145.752	161.757	-80.9443	138.657	-7.54493	119.052	121.596	0
60.9699	133.063	-61.4647	153.847	-125.126	84.912	83.3598	-122.763	83.9685	-37.0241	86.0115	-3.68386	-165.59	42.6303	-0.473515	0
61.9694	-129.672	150.149	92.9274	-65.3807	-129.543	161.448	-80.0836	105.973	56.686	55.8672	-139.492	120.324	23.4007	70.5405	0
62.9689	-170.301	-55.8935	161.056	-81.3285	-159.275	53.3736	6.48085	-170.413	122.483	-56.067	86.5061	-147.092	104.216	-79.3156	0
63.9684	165.535	-45.7204	-13.3723	-113.126	-46.3089	38.1947	136.78	-6.29621	-138.779	177.446	111.866	11.0063	50.9904	85.9015	0
64.9679	-12.7455	78.6036	134.333	-25.4518	-160.641	55.0284	-179.474	110.133	66.3663	-78.778	-5.92238	33.1058	122.533	-23.5933	0
65.9674	130.381	-68.579	86.8105	-104.231	-9.23895	165.281	-66.0523	-9.77265	45.633	-100.47	-6.73839	-114.907	99.2134	39.1369	0
66.9669	136.08	-133.75	55.8453	155.314	28.4964	-75.524	-8.5559	-132.074	141.746	27.2716	-70.9608	-0.819558	137.079	-122.747	0
67.9664	34.8555	92.3716	41.5559	-166.84	-174.712	-2.8779	17.1952	-17.2379	123.182	-174.544	103.465	121.755	57.6276	38.1755	0
68.9659	45.8391	-154.97	-8.30529	-35.315	55.1186	131.823	172.321	-13.0417	114.762	-24.4022	-177.254	-126.885	142.573	63.1524	0
69.9654	139.194	-174.222	116.215	-94.8569	-77.359	39.8004	-74.6012	119.706	85.1134	148.154	-54.72	161.724	105.406	147.542	0
70.9649	-17.4439	-122.581	97.694	130.73	-29.924	162.915	-80.7985	-129.476	58.9179	86.0442	166.984	103.297	41.1553	-34.3718	0
71.9644	95.1459	-135.488	-50.3966	-70.327	123.453	-91.0206	126.152	-144.398	116.41	-32.3247	-40.0509	-149.045	53.8237	81.7365	0
72.964	-84.3208	131.224	-161.553	24.2113	102.714	100.346	-176.177	-112.562	0.0824116	-174.516	-133.248	-116.046	145.649	-72.1325	0
73.9635	22.5364	155.643	-79.0655	79.7943	-65.0783	104.62	122.552	19.4058	36.1671	-51.726	46.608	124.572	-81.9674	-9.6224	0
74.963	157.949	-59.1527	-49.5242	-46.3654	119.464	57.7253	-13.3531	-91.7091	13.2064	-17.3065	-56.631	176.158	-179.407	-104.71	0
75.9625	148.387	132.946	60.3342	64.1558	-3.57209	91.8621	111.848	-100.211	166.133	-90.0506	4.52116	-169.48	69.3634	-131.039	0
76.962	-92.7348	-86.1719	93.0805	68.7654	-157.686	145.776	17.0379	-160.124	-53.7796	-53.9935	92.3374	86.3146	78.0905	-71.3694	0
77.9615	132.399	178.004	11.0154	-9.46985	42.2353	65.1756	140.349	-93.2901	-150.024	13.4201	-24.8538	-56.0143	19.6196	-55.7605	0
78.961	-20.1041	49.5535	54.6268	33.0406	-84.0496	-107.332	25.6603	-41.9467	-137.408	31.1797	-163.032	36.4106	-58.1585	-91.9688	0
79.9605	-172.419	-167.471	14.1332	84.9474	-18.277	-86.6071	1.33125	-76.0682	68.3752	117.178	-77.3813	-82.877	-131.745	165.175	0
80.96	-100.715	108.889	-33.7486	-43.7939	4.42624	-111.173	9.19971	-92.4832	-3.28722	-81.6239	-3.22512	-75.219	21.5264	3.00441	0
81.9595	-24.8713	-162.627	104.221	-1.28551	-109.458	108.887	-144.628	53.7334	90.9219	152.173	-25.6459	-168.258	-79.0848	83.4073	0
82.959	-106.786	23.2961	93.6	-167.407	-116.971	38.6702	-115.769	-30.2484	68.1159	77.4184	-7.37086	117.449	125.688	-20.389	0
83.9585	105.064	-115.922	-121.433	75.7683	-13.5317	-42.4807	-149.376	-13.6274	-85.9308	-167.779	-168.459	-23.162	150.881	-3.51316	0
84.958	-144.589	-151.761	-107.674	-62.0311	33.724	-147.494	64.7457	149.987	-13.533	-50.3561	1.92444	-25.0826	149.453	-41.8952	0
85.9575	62.3608	57.8718	177.224	112.325	-60.3365	36.3907	-145.208	-140.749	3.47911	-25.0682	-170.861	-81.0899	114.946	27.4688	0
86.957	73.2648	95.6627	-136.423	-42.6903	8.32308	8.77889	92.1145	130.333	-98.8003	66.6835	51.3244	54.8614	3.43319	141.413	0
87.9565	109.629	-17.9464	-45.0063	98.7865	88.262	72.0903	66.0294	144.543	69.7667	-5.49219	-81.5871	75.2412	-87.8639	-108.72	0
88.9561	80.3369	6.26488	-60.5667	-131.762	13.2882	105.812	-133.886	170.875	58.3646	41.2039	-42.4648	17.6036	160.468	47.6626	0
89.9556	117.505	-37.6045	82.3127	-92.9087	-79.7504	47.111	99.8172	-148.411	65.9951	-64.0537	-63.5795	-62.2572	-176.61	18.2783	0
90.9551	-154.63	-20.5705	-39.8656	149.659	-170.095	-127.887	88.2782	-171.351	77.2365	-89.6734	138.437	-143.464	131.736	-133.454	0
91.9546	60.5448	1.35399	-9.09057	148.366	73.7762	-62.3403	104.219	-144.762	22.4321	-90.6157	-20.1574	165.765	22.7399	-166.381	0
92.9541	-107.086	165.329	-1.91084	14.0808	-91.5715	168.453	-158.141	-107.839	91.3672	43.3424	6.70699	-19.592	17.3391	-170.254	0
93.9536	175.369	19.5452	62.0024	51.0385	-31.5385	32.5316	26.6577	-108.41	-19.9979	-105.921	-130.737	34.5703	97.3655	-176.938	0
94.9531	147.053	20.143	-65.0899	51.1258	3.43288	68.4619	56.9335	104.393	7.38383	-53.6146	-31.4855	93.7903	122.457	-178.391	0
95.9526	-146.919	0.725554	9.40946	57.9443	-0.761778	29.5526	73.8619	10.6328	6.49848	-14.2844	0.533451	-48.6036	-95.1207	-80.0531	0
96.9521	71.4882	178.242	179.268	-58.7235	-92.5628	-155.863	-121.644	176.014	178.854	157.119	-173.681	154.786	109.57	-94.4345	0
97.9516	106.97	-140.179	173.718	20.8284	-168.874	95.8735	175.95	53.1564	133.225	-155.397	169.261	123.935	38.4116	-124.617	0
98.9511	-0.580878	150.959	69.9835	-159.454	-38.3469	172.275	-135.405	162.848	87.9127	-15.903	124.588	132.318	109.898	41.4768	0
99.9506	56.9714	15.0825	-169.495	174.073	-92.8906	142.318	-83.745	-17.0502	-109.518	-117.486	85.0022	-156.804	110.937	159.314	0
100.95	-62.3083	-64.2438	142.948	158.702	107.928	141.718	-108.882	145.5	-113.91	172.657	110.539	-133.356	167.577	40.8095	0
101.95	-115.637	125.011	-91.022	-45.7304	-70.1419	7.56176	-107.658	-66.312	137.818	133.925	168.465	-51.3884	-69.7229	-146.117	0
102.949	-13.8524	-103.158	-11.396	32.2551	-112.689	63.5701	-83.9521	164.174	-19.0307	104.21	-179.436	162.949	-118.838	-132.379	0
103.949	-14.0136	84.7542	-142.167	-161.69	106.446	-158.227	24.4324	-60.9072	127.667	117.921	-112.871	-81.1882	96.6247	-8.65117	0
104.948	-20.3783	57.7543	-29.6666	-35.0696	174.204	-161.004	-146.103	15.3586	-173.952	-68.0289	-98.0136	119.791	69.6853	-166.93	0
105.948	-100.348	-46.5539	14.8289	36.7196	-156.829	-170.18	127.906	-129.187	177.283	153.071	172.418	147.973	-109.354	106.614	0
106.947	128.165	-32.7445	145.094	-130.09	14.4293	120.838	1.21729	-62.4015	-138.962	106.932	-136.487	-126.857	-21.6271	19.7564	0
107.947	149.468	168.011	-66.6549	-26.5211	-82.1032	54.4009	120.235	50.2315	-56.3082	-106.723	-138.893	170.458	20.0344	47.5645	0
108.946	-85.0241	-49.3956	-163.948	-146.549	-96.3241	33.1593	138.698	19.9563	43.8898	2.51788	160.512	0.0745073	139.013	158.607	0
109.946	32.1833	85.5908	108.595	143.61	123.404	-108.532	114.56	177.571	87.1354	-161.658	3.59906	70.5634	103.971	176.297	0
110.945	27.3831	116.567	175.679	-28.726	-9.24662	36.9454	-139.981	136.251	97.9215	140.527	-13.2334	61.6598	59.5458	-99.6814	0
111.945	-163.622	-165.447	-39.712	72.4403	-107.931	145.287	-140.867	117.037	150.946	-138.709	149.628	-177.67	165.426	-27.1566	0
112.944	-150.22	91.4847	176.906	42.203	-50.5415	153.929	-167.221	-3.18465	-12.3466	-116.298	27.8114	155.095	90.7537	-108.042	0
113.944	111.619	27.4449	44.3056	19.7982	-58.9987	-80.107	48.9471	175.276	5.00828	101.922	47.0017	124.704	60.8808	17.6434	0
114.943	-130.534	-4.31261	-110.907	12.9781	-102.16	-106.752	25.7039	110.38	67.5774	102.681	-14.4248	117.363	108.714	-62.2173	0
115.943	-22.0346	-49.2432	-66.7647	38.7273	-28.8285	64.7012	-36.0082	108.103	157.062	80.6331	-90.925	79.3528	170.677	179.182	0
116.942	57.6975	154.51	-49.0927	-49.6551	-36.363	103.663	45.2514	92.4913	79.9457	27.8761	179.062	-2.31075	104.612	-54.6838	0
117.942	121.179	90.2651	44.1645	19.9928	-68.6094	20.4059	-98.6132	153.821	11.4616	20.2189	54.2039	-84.8265	-77.6778	-102.558	0
118.941	90.3234	-45.2705	-166.045	25.32	-20.5953	-59.213	-176.57	153.874	51.2326	79.8545	-88.7339	-76.0568	84.0106	105.112	0
119.941	-84.0222	163.924	-104.18	169.276	-45.1628	-13.5533	-173.074	-172.907	-106.409	-132.391	171.595	143.419	152.098	64.2498	0
120.94	121.817	37.4375	153.947	158.831	-118.456	-88.6068	-97.6037	-127.368	89.1351	141.741	-38.6181	109.314	124.214	20.9929	0
121.94	-176.382	-146.642	-11.8366	-2.80625	-74.3065	86.7168	51.6937	93.3686	93.6845	84.0174	-70.1105	101.791	115.622	55.2697	0
122.939	-139.171	-99.8165	-16.7891	-0.424218	77.604	-91.6246	50.9691	-103.113	36.0936	10.0676	-11.45	117.648	139.959	-126.514	0
123.939	117.037	-94.2342	87.1177	30.4912	-55.5406	-92.7071	-147.636	122.572	98.1939	33.5296	17.9681	83.7857	111.895	140.136	0
124.938	68.3568	57.0196	-133.963	162.119	-82.473	60.3962	101.679	50.9846	160.694	69.3311	-124.913	6.16002	-101.878	112.989	0
125.938	109.58	-158.225	-174.196	152.13	-128.029	177.96	100.946	167.269	64.4559	7.67213	57.8108	163.471	-59.5087	82.1372	0
126.937	-124.043	-141.745	-61.6736	-39.5749	-22.0791	-156.525	-155.382	-79.6877	114.775	104.803	70.3411	-129.952	101.026	-85.2521	0
127.937	65.3853	-102.253	-56.2167	-142.573	-151.016	-121.833	-163.881	-122.041	135.384	-12.1385	-5.70164	-168.447	104.602	96.5226	0
128.936	-164.332	120.529	100.499	168.204	-96.7103	-63.535	75.3591	-3.13743	-62.6736	-49.412	-122.23	96.1739	119.898	87.9407	0
129.936	161.977	-75.4588	-159.718	-120.701	64.6367	-119.138	-129.355	167.924	-36.8167	-28.7983	-145.154	33.5803	175.285	80.8025	0
130.935	126.459	-90.9217	-25.7762	-29.539	-61.1893	115.778	109.298	53.8714	136.994	21.1936	17.129	-171.376	123.09	90.1723	0
131.935	163.325	97.743	-89.179	-31.562	9.90956	-76.2477	-112.053	96.581	-143.602	-109.077	47.9889	-147.861	89.4811	-109.863	0
132.934	52.5252	157.932	-140.879	-23.3163	27.8767	55.0492	-164.436	-118.885	166.639	84.0777	55.6103	-156.258	137.994	-156.54	0
133.934	-135.029	-43.3625	113.53	-80.9305	-40.2566	-151.535	-3.70348	56.9502	-71.3303	-111.806	20.3406	38.8587	112.166	156.943	0
134.933	134.887	132.752	-176.898	4.89204	88.0501	-10.0118	135.81	164.45	92.7598	55.4857	-143.326	99.251	36.8046	40.7289	0
135.933	-92.9001	-20.5942	137.036	-105.106	-89.6589	-18.8754	-68.2348	-104.806	-151.887	-9.39653	38.8954	-117.532	54.1564	-101.867	0
136.932	47.6966	1.92936	71.7133	150.488	-53.0355	-166.621	-64.0046	-3.52077	152.654	91.9338	-17.4094	52.0084	89.9175	8.30871	0
137.932	-5.49043	22.1876	139.603	-90.8824	178.746	-85.1326	123.188	61.288	122.525	98.2564	-65.4024	68.6033	84.3386	67.1603	0
138.931	102.712	83.5035	46.0536	84.2218	-5.34427	166.682	-129.316	7.87795	88.984	-34.4417	17.9007	134.102	172.978	23.2902	0
139.931	-108.777	-16.9034	34.6939	-72.2683	-153.415	40.759	147.778	-151.29	49.5232	83.7768	6.37412	127.699	48.7922	-154.731	0
140.93	158.533	-16.0421	46.3139	-79.0381	-114.974	34.295	-62.6887	3.23896	110.471	75.5987	62.954	7.47265	-61.8899	-52.0809	0
141.93	13.3741	31.182	130.842	-43.6255	-29.2461	-141.037	-1.2847	-68.7174	71.165	80.2411	13.1694	75.9487	-178.026	-139.028	0
142.929	18.3147	4.82449	71.9956	-15.4403	20.0676	-164.086	-56.7439	4.27284	67.5416	16.7728	32.6889	73.2476	34.331	68.7282	0
143.929	20.6408	56.1395	23.5067	52.327	19.0911	51.6106	77.7864	-30.4688	57.7643	51.6895	65.664	48.5119	64.7253	147.001	0
144.928	-141.167	-146.405	-146.023	159.574	-153.173	-66.5968	-20.3847	64.5867	-130.933	-148.38	-125.639	-142.428	-109.761	154.314	0
145.928	-125.948	173.03	131.945	128.738	170.478	-179.08	-47.7245	17.8705	-145.894	-158.525	-105.808	-176.387	82.4531	-104.45	0
146.927	-158.076	-75.7876	-151.035	102.755	161.391	108.516	-15.5919	-46.4892	-113.108	82.7915	-116.446	82.5469	160.323	99.9509	0
147.927	-155.847	76.3637	-24.7544	-69.1198	-139.111	67.6696	-45.8201	90.2121	161.963	148.198	169.568	56.5733	153.009	127.483	0
148.926	140.263	46.4454	-92.3253	-152.632	-157.896	-56.9001	-84.5558	-1.75453	178.378	-148.557	-49.0633	85.5082	159.522	-85.5096	0
149.926	23.9342	-79.0422	44.2072	97.5515	141.499	20.9095	176.61	33.2402	118.684	155.965	-164.675	152.258	-87.8235	152.43	0
150.925	109.812	-169.177	-171.574	-40.1474	-90.8912	-7.91264	3.14638	77.2944	-88.8401	168.108	-98.5138	-159.952	-168.142	-76.6403	0
151.925	169.894	-129.869	140.495	103.374	52.1141	-39.1652	-42.2565	-52.7951	-173.613	-26.6366	86.216	-122.123	-106.558	-66.8329	0
152.924	135.693	35.5731	-100.796	89.9132	-109.311	-167.808	-78.2588	-147.085	94.7835	66.8224	-156.517	23.7727	83.6252	-63.32	0
153.924	135.569	-22.1099	-117.192	-61.1408	-149.957	51.0647	83.361	112.527	72.963	-79.1263	144.523	-155.042	72.7329	1.73469	0
154.923	138.167	-168.438	-125.359	-168.604	-58.9646	80.9868	65.9848	-170.899	173.803	-100.542	-99.3783	-178.577	148.866	-35.7734	0
155.923	68.4376	-159.731	46.8795	-164.778	78.7292	17.5529	-92.7188	50.8432	101.486	168.718	-52.9108	-3.80077	97.6171	-147.21	0
156.922	169.94	-30.4058	-17.8818	-94.8419	-44.8445	76.7642	-140.584	138.592	-27.5166	-69.9265	138.252	114.983	77.2271	53.4701	0
157.922	136.162	175.684	162.746	72.8139	-148.431	68.6307	23.6961	99.7612	162.682	172.874	-99.9081	-141.765	177.331	16.4067	0
158.921	128.452	71.9904	-165.893	105.202	-69.9914	167.435	115.861	-49.1073	38.4157	58.6106	38.7043	11.8445	144.704	-172.835	0
159.921	107.362	-84.7308	175.845	149.38	-105.429	-163.22	95.4554	-53.8023	131.591	74.341	141.137	-32.4684	131.371	-8.77098	0
160.921	70.9034	-57.0269	139.24	77.28	-18.1841	69.1716	174.968	-40.4577	100.045	-23.1977	94.9537	174.207	48.1606	69.9796	0
161.92	123.644	79.4805	175.571	-63.5234	-124.717	-112.561	147.638	-97.1898	0.289136	-116.805	-179.595	-140.179	-178.838	-88.7962	0
162.92	173.989	105.068	170.737	-18.5396	89.019	-19.1842	20.8315	-8.94726	119.072	-165.692	-35.5874	-31.0489	118.618	-50.8863	0
163.919	15.3959	-60.8235	165.955	-54.2863	-84.364	125.536	126.611	-115.294	7.62371	-114.612	108.471	78.2562	107.287	-92.6673	0
164.919	97.709	105.672	48.804	176.515	-87.0499	-20.1615	-13.4683	144.659	26.5644	167.404	63.813	133.393	-62.1729	-15.7596	0
165.918	-132.443	-20.8981	169.28	-6.36594	79.1183	-29.5094	-84.2459	-107.432	59.4294	-151.216	10.7631	129.276	-136.893	-113.819	0
166.918	128.877	-69.5768	-145.796	72.3302	-119.29	128.357	-34.4829	118.154	93.5032	164.973	135.451	59.8439	23.2594	161.158	0
167.917	129.652	79.7721	-177.631	-61.5225	-115.368	-102.678	36.5714	-77.5318	88.917	38.0922	-77.0776	106.15	94.0504	-83.2676	0
168.917	149.321	-117.858	119.723	-0.192917	-40.2883	-30.0915	36.0977	-127.646	-174.48	83.006	31.8845	64.1745	168.145	-108.72	0
169.916	81.3625	-146.52	-163.325	141.818	-16.3455	-158.128	-34.3103	-158.895	145.979	6.65167	89.0595	-115.42	177.366	-46.9148	0
170.916	-157.423	-166.779	-34.9272	-100.239	93.6913	-163.494	99.2683	-84.4582	-103.959	144.959	-54.6498	98.8649	28.5596	163.15	0
171.915	82.451	-100.935	169.034	-5.27517	-59.4776	-87.347	-142.786	84.9256	78.0609	24.3274	-12.4673	-140.202	-29.8687	-169.838	0
172.915	54.7195	91.6651	111.553	-154.718	-33.5007	-8.74554	139.214	-3.52993	173.789	-21.7812	-136.404	-34.5874	116.681	-61.6915	0
173.914	-163.786	13.546	125.494	-65.2431	-120.129	169.383	-32.1247	131.423	-54.1341	-79.0839	5.23388	-158.389	8.30172	142.481	0
174.914	-172.772	15.843	-105.871	-175.045	135.33	10.4763	-141.053	-146.829	-141.427	-31.33	-130.62	142.209	156.669	81.9866	0
175.913	43.1897	-105.708	-176.236	13.1552	157.597	71.3727	-52.2092	-64.5797	-151.509	-140.167	19.3379	-15.2357	66.0195	-132.039	0
176.913	146.032	47.6718	170.368	-77.2013	-140.728	87.3174	-98.2338	54.7181	92.8733	-116.398	-148.2	137.052	151.226	82.4697	0
177.912	-170.748	-156.767	159.063	9.68969	-7.54889	-149.692	-32.058	89.3355	154.61	169.572	144.974	-84.2664	147.862	-141.965	0
178.912	54.6298	140.655	123.389	125.596	-20.1985	56.2519	-75.1098	146.938	-175.312	-97.1164	139.253	-159.795	113.189	-139.577	0
179.911	125.75	-126.072	52.2015	95.377	-11.9801	78.6104	150.33	176.152	-170.769	-142.573	49.4221	10.8835	-164.086	72.4855	0
180.911	171.29	-85.6039	47.0107	103.515	-58.869	88.5017	80.7006	-149.975	160.9	-140.321	-14.352	5.01876	148.968	21.875	0
181.91	107.058	122.334	-160.258	20.5	-88.4635	147.919	-50.2113	-169.034	124.187	-75.8792	-131.777	72.5908	134.056	-157.096	0
182.91	18.6724	121.611	-146.189	67.8008	120.98	-31.8634	93.4032	-18.9448	151.02	156.482	-117.522	37.657	60.9798	-104.147	0
183.909	41.7239	-159.822	-26.508	124.544	-96.4235	169.413	109.468	-41.5906	171.973	154.872	-39.4228	62.9407	-4.67253	24.9659	0
184.909	76.577	105.823	99.1779	165.243	59.6573	83.4459	127.299	84.7172	154.043	160.262	20.8117	-117.198	166.835	157.462	0
185.908	94.3657	161.602	135.238	58.3696	-173.756	-172.867	-89.5312	-167.207	-174.804	-165.963	-53.3666	147.901	36.2543	4.58245	0
186.908	-110.427	126.367	25.4895	-82.9217	-7.33527	4.49774	75.8047	-49.4841	126.817	135.195	98.621	145.617	103.272	-58.0514	0
187.907	-126.919	-157.545	17.1648	-151.391	173.463	159.911	84.6463	164.343	-161.563	32.4887	-26.7622	107.531	143.393	-128.673	0
188.907	53.7359	94.8859	-179.992	-138.249	-77.3414	-150.292	-74.4567	-97.6555	144.344	154.998	-145.832	-162.598	127.351	-151.911	0
189.906	110.15	-167.671	97.3103	161.919	-57.237	86.5292	-113.486	-162.604	-157.714	163.787	124.216	99.2236	-130.572	165.931	0
190.906	-178.797	161.959	-142.672	100.306	-120.775	130.348	41.2233	-163.839	129.182	174.438	134.094	-158.408	-178.603	-63.5184	0
191.905	-111.32	-179.758	149.108	-165.94	156.761	16.6251	63.7758	-147.445	176.363	-157.484	172.557	-145.631	152.469	60.2424	0
192.905	1.63114	-3.0356	17.916	-56.4667	-20.8941	-53.25	78.9549	-154.253	-6.40822	-8.3847	-14.1927	31.1033	11.666	19.5982	0
193.904	-91.3819	-50.632	-21.69	-30.2493	-18.3598	32.6784	-160.854	-54.719	169.798	-50.8598	-57.9489	-67.3859	-85.9946	133.524	0
194.904	56.1604	20.5988	75.8456	22.6268	-50.5802	173.592	35.5083	-107.57	-2.72682	-176.387	-4.81485	-64.2896	47.1567	-131.035	0
195.903	78.7335	-94.1209	153.803	24.0853	-69.0042	-14.59	-78.6501	96.1669	-120.428	-52.8114	25.4097	90.8427	170.961	-87.3195	0
196.903	171.468	-178.737	61.6505	-42.1558	-77.7987	-67.987	-137.063	140.199	-61.2466	-3.04941	-24.9108	-109.601	20.2962	124.252	0
197.902	-150.182	-166.449	33.0901	178.393	-5.54841	166.22	-161.137	-151.085	-131.079	-103.163	-10.1328	158.857	134.984	107.17	0
198.902	-150.687	-28.3796	-88.2841	-7.82225	-101.342	146.514	21.8256	104.302	39.5808	-26.023	53.4988	57.9958	47.7164	-99.4996	0
199.901	128.697	-61.5307	87.8117	87.7307	12.8719	148.495	-17.3067	108.841	21.1218	114.775	12.9234	-83.1373	-177.669	45.9697	0
200.901	104.963	-52.4828	95.1141	-174.314	-66.8887	-53.3395	66.4393	28.9821	-14.9344	-51.6977	-55.2367	117.321	-59.2371	-33.5717	0
201.9	25.211	15.7029	79.2252	-176.305	-11.9001	-12.4137	-168.535	90.1755	72.7446	34.9084	-173.444	112.349	115.255	-124.368	0
202.9	142.814	-18.6399	-57.8428	142.607	-20.5549	173.098	16.3585	-178.216	8.29281	109.37	8.86416	77.5868	72.9903	-136.786	0
203.899	146.186	-95.1917	52.3359	-62.1918	8.88187	-129.111	-42.8983	21.9024	-108.817	43.5067	-42.0507	118.597	-153.99	-44.2553	0
204.899	-131.698	27.8272	37.3349	-32.2912	-57.771	9.15268	-51.0861	149.835	29.3889	-70.8609	-123.853	52.1448	113.281	130.742	0
205.898	33.6584	20.5057	25.4291	-38.7519	-74.752	157.002	120.752	-135.576	-51.1701	-26.5864	-85.8148	172.844	-97.3079	174.369	0
206.898	-49.1265	-56.7717	132.21	30.9851	43.3801	152.664	5.95319	-142.519	-168.658	8.11663	-67.1652	42.6303	113.783	121.759	0
207.897	-173.732	174.224	147.484	-26.7828	-3.973	74.0242	73.3059	-119.389	-176.445	133.583	-67.2945	-95.6598	178.221	15.5758	0
208.897	-97.3432	12.2336	-107.355	-102.834	29.6817	132.008	89.9315	-49.0763	44.6763	-48.5735	-69.6159	-89.0581	-12.802	5.11898	0
209.896	96.7023	-1.45265	126.032	120.882	83.7197	72.0715	-79.9268	-116.064	-169.653	72.6352	156.309	63.1804	132.056	137.67	0
210.896	102.788	135.826	-142.44	-41.0552	29.148	21.8508	178.308	119.879	74.0119	92.2361	-128.171	-98.5809	165.28	-158.196	0
211.895	-142.467	137.486	-76.8514	-37.8581	-76.268	23.1184	-69.5419	3.96678	108.47	140.91	121.573	-130.185	87.5757	8.64756	0
212.895	87.5797	103.862	111.251	-104.723	95.411	-151.874	-108.806	-39.8018	3.91094	-77.2649	16.5389	82.1042	92.397	-174.066	0
213.894	115.468	124.509	-149.849	14.6988	42.0946	-39.8467	22.6864	46.9671	134.571	-163.158	138.879	46.5076	127.348	-125.991	0
214.894	1.97856	-92.915	-71.7283	108.999	-18.4418	-31.6195	97.6118	-171.212	105.569	44.5047	-64.8534	42.4214	99.2716	-175.466	0
215.893	36.7123	109.619	86.1988	97.1877	-171.654	-6.56857	-14.3578	25.7919	79.2939	41.9851	68.1548	49.5548	115.327	-106.969	0
216.893	-114.314	61.8977	-147.116	-53.9551	14.8813	78.1239	-72.8365	-88.058	145.165	-27.9834	-5.24417	50.374	114.133	-178.4	0
217.892	151.539	-34.6327	123.766	-106.945	20.0037	74.814	57.0792	118.614	20.6115	-147.647	-159.932	-160.182	37.0196	32.0081	0
218.892	113.886	-24.4923	10.431	158.028	141.636	119.192	118.532	115.172	81.1147	25.339	10.0743	102.111	133.418	-156.784	0
219.891	-85.5015	-92.996	57.2237	-179.121	-168.904	-10.3461	92.3758	162.364	98.1211	115.906	172.192	-80.3979	48.8849	141.065	0
220.891	-126.29	141.271	-107.377	124.689	75.399	-78.2335	60.5907	29.4594	-55.5978	61.1718	44.4174	-56.2465	87.6048	-65.0104	0
221.89	73.642	-26.7654	34.9707	-149.16	9.2618	-126.008	-90.744	175.437	41.492	-15.6688	28.1027	-111.956	45.1628	46.8477	0
222.89	135.85	-122.713	158.914	20.5284	-82.5765	-154.916	28.4261	146.258	50.8672	-170.778	-117.691	61.4283	98.7219	-12.9768	0
223.889	90.4877	-34.9037	-82.4801	-58.9039	-37.3986	66.5312	80.3906	-83.0381	45.6062	-73.6211	-6.05216	93.4934	116.11	-119.792	0
224.889	-142.881	69.3757	137.312	51.0746	-89.0181	-78.8645	-84.9704	-155.974	83.7912	-129.476	-68.0748	135.853	136.839	-16.4768	0
225.888	50.0913	78.4713	-79.729	79.8845	-8.06521	151.753	-69.3223	70.0652	-138.956	-33.0635	-37.3785	49.5504	64.1301	-167.169	0
226.888	-134.693	77.418	-31.4309	51.3292	128.929	93.9855	-160.296	-75.9492	-158.229	178.881	66.6907	152.19	-73.3082	-129.617	0
227.887	91.9662	-65.5383	-125.871	69.6135	-90.5477	133.756	39.2682	-103.273	-161.02	-103.634	66.4515	-117.048	117.12	87.6758	0
228.887	67.377	70.2419	28.2099	-118.887	-83.2534	-64.1363	-49.9236	144.644	-133.385	177.219	143.98	-152.041	109.795	-6.0729	0
229.886	158.867	-28.4385	-159.517	178.555	29.1513	63.4202	-36.1893	-97.9598	-114.563	113.18	-96.0322	-5.33554	50.7594	140.288	0
230.886	-143.841	142.8	-176.243	-154.692	-92.6307	-49.334	70.3469	159.754	42.4374	-30.3673	69.964	-109.081	-178.477	-80.5127	0
231.885	32.9081	-98.2772	104.506	34.3038	-78.7782	-126.996	-130.865	25.5729	179.891	8.98756	-141.228	149.641	134.051	159.91	0
232.885	47.844	-151.512	6.98484	152.117	-61.6344	-133.048	-145.1	-32.9012	52.5498	15.9376	41.5739	167.459	-7.74754	41.3263	0
233.884	141.786	-179.415	115.324	-48.0011	-53.796	-101.656	-110.716	-149.631	39.8928	155.243	147.906	-130.868	107.811	-44.4255	0
234.884	107.347	77.1256	-153.56	-7.26937	22.8166	54.1491	2.32366	-125.054	152.438	-168.289	40.4279	-77.7075	110.286	70.055	0
235.883	109.286	-33.495	23.956	-25.6701	-109.817	-134.826	-156.788	-18.4569	70.2201	114.309	-30.3065	-13.0553	83.8681	68.1639	0
236.883	93.4727	106.34	175.173	142.555	170.412	3.37785	33.3462	-163.359	-159.727	-14.0837	33.1183	126.677	134.202	143.45	0
237.882	8.83971	-49.9013	16.1154	-52.9718	-76.4712	167.433	-172.004	-169.998	6.20235	-46.0476	-150.471	127.311	-172.618	40.663	0
238.882	-55.8115	-35.3276	71.448	179.009	-68.3937	76.5766	96.4176	-84.5209	114.717	-98.5039	140.936	-155.378	127.017	-17.3231	0
239.881	10.2566	129.811	116.563	-123.759	-118.923	-92.4963	-63.1351	60.9877	-112.505	-37.7072	144.654	128.91	142.936	12.9762	0
240.881	-115.856	-29.5033	65.7348	45.6315	20.8739	-125.511	-75.2715	23.4739	62.5328	90.0585	-51.4207	105.363	114.77	-100.85	0
241.881	-143.876	48.3179	113.665	128.202	-27.4258	-178.51	-138.887	-146.238	146.656	119.697	-1.3275	-150.457	116.914	133.695	0
242.88	-165.032	157.49	2.00244	-74.9838	-78.2142	-71.6389	-128.91	-130.711	-105.471	135.324	-80.6404	-147.968	104.816	74.5801	0
243.88	106.493	31.7724	153.131	-92.9744	-166.843	49.9043	-6.45575	-101.136	102.485	178.647	-109.547	-48.044	81.8834	-67.8113	0
244.879	162.354	-6.21425	84.9325	104.298	-133.675	24.1249	-99.373	-19.096	179.481	-149.332	136.374	-94.3648	127.714	-20.1704	0
245.879	-127.01	-37.1636	101.833	114.573	-26.2203	-129.801	-74.189	-175.945	-174.115	-147.169	-108.953	49.7043	70.0478	-43.5847	0
246.878	-74.9394	86.7485	-131.93	-99.0382	-132.371	-21.5395	-144.199	-115.508	-164.723	29.0451	-63.8921	-131.04	155.595	176.419	0
247.878	58.5995	145.167	153.381	174.82	-99.5672	82.5284	165.587	-19.6377	31.2401	-142.191	52.9987	-82.4136	98.9372	-153.196	0
248.877	100.222	89.5317	63.3516	-63.9182	36.0073	128.862	-151.389	-55.2747	130.003	-169.952	107.723	22.3098	137.263	-25.6962	0
249.877	97.3241	-154.522	151.978	-176.193	-76.4426	-67.9344	-10.6641	165.711	-118.192	-120.27	-103.587	-49.3948	159.807	174.661	0
250.876	-164.125	176.998	-30.1785	-113.058	-58.1517	169.476	69.6306	-125.662	107.265	116.265	-7.7423	106.171	118.3	-71.4423	0
251.876	-148.992	77.6397	-6.13657	46.3893	157.062	145.26	-71.6915	-59.3803	137.989	25.857	58.8797	-59.6071	152.108	78.2204	0
252.875	-151.114	109.625	135.593	44.8504	133.165	17.7328	-85.664	-144.419	-37.1125	-50.5718	-139.585	-133.639	121.833	-137.153	0
253.875	77.2901	-72.1235	-21.9324	48.3031	78.5065	-11.0915	-108.38	1.66256	-165.021	-8.73603	177.181	70.858	-145.641	34.0401	0
254.874	34.4418	-130.961	147.651	-50.0413	-129.914	164.829	131.019	150.138	116.897	-35.5147	-9.00648	-131.445	139.73	91.4293	0
255.874	50.4811	40.0242	-115.051	89.5563	-52.6285	-22.0949	-36.583	153.47	-23.028	64.2058	-142.855	-104.052	146.631	-147.79	0
256.873	-68.3358	39.4291	147.726	94.2489	11.8539	-112.891	-89.0298	11.3076	-159.247	138.893	-80.9083	83.3984	-164.325	-8.82133	0
257.873	-179.612	24.6845	-137.224	-94.0903	-36.3483	178.122	-76.0038	-141.31	-18.9392	99.2485	-120.128	-14.6554	104.982	101.478	0
258.872	64.9381	149.8	-27.3717	-94.792	163.6	-146.496	105.984	150.276	-160.758	66.4379	110.121	-134.977	119.69	172.808	0
259.872	91.8213	-17.5299	-61.3444	33.5271	59.46	-154.592	132.225	0.503561	9.13273	66.0905	53.0552	63.015	157.941	96.6245	0
260.871	-109.158	79.6209	-36.3361	40.7991	-9.52917	107.593	-159.692	132.962	101.85	130.262	-174.821	-99.6511	145.321	-174.089	0
261.871	71.0901	-139.832	92.1993	-118.126	-84.2771	-41.7977	-20.5413	1.35486	141.886	-113.413	161.416	-61.133	146.562	101.548	0
262.87	138.195	39.6104	-177.302	-98.8003	-105.255	-60.0117	29.9239	105.548	62.8434	179.8	-72.2631	134.907	154.27	-81.5266	0
263.87	97.9162	-73.7536	87.9193	-3.04624	73.5675	133.585	-80.022	-54.4731	154.352	-130.623	136.75	-179.815	114.027	110.294	0
264.869	125.557	-120.747	10.8065	-160.105	-53.4842	101.355	8.71741	-3.82222	153.965	145.225	148.347	-133.274	156.284	61.8512	0
265.869	154.085	49.3746	-169.831	-138.738	-24.3974	119.565	-105.03	42.1976	120.106	-41.3845	-22.6346	-125.014	-163.265	-38.7983	0
266.868	126.68	68.3085	96.5612	169.856	-132.336	-117.476	-69.1798	175.765	138.258	107.543	-141.262	-133.43	173.638	24.5841	0
267.868	175.678	157.519	-100.68	146.53	-135.889	124.289	5.78543	-119.669	141.124	13.0803	-173.003	147.855	158.293	171.143	0
268.867	60.1257	-65.7309	133.196	-141.551	-75.3884	-175.698	139.881	-137.731	11.3368	151.613	-101.085	-110.829	101.911	-115.703	0
269.867	45.8222	25.6632	74.3359	121.557	-24.8186	-31.1696	-176.671	-111.397	150.348	-144.1	132.333	169.859	160.95	-123.502	0
270.866	111.948	-137.97	63.7595	133.382	-169.582	-160.898	72.868	-24.4256	-5.61256	50.1787	-176.108	-76.0028	144.824	48.1383	0
271.866	134.236	-168.162	119.844	177.356	-79.1745	132.131	-53.3189	-152.244	-34.9952	-5.55601	-99.1163	123.897	127.167	-98.1933	0
272.865	-171.98	-129.955	148.808	-118.423	-67.7523	-78.7074	45.4165	-67.5361	171.642	157.319	-142.587	46.0796	116.978	9.36461	0
273.865	90.1761	-44.7672	-129.207	131.679	-19.457	14.8629	-174.81	-109.322	118.229	-71.6993	-1.8845	-170.332	142.169	11.1713	0
274.864	-167.257	20.2311	145.958	-77.5	167.476	-146.154	-36.4131	-120.616	-159.008	-43.783	-77.1825	-100.849	101.743	134.325	0
275.864	163.679	93.5758	106.064	111.415	-94.7986	-64.5217	-112.183	-46.5576	-106.182	73.8413	123.212	33.2735	149.965	107.596	0
276.863	11.8798	-12.5315	157.124	23.9413	-114.798	-176.079	-111.507	-35.7308	90.9438	-51.824	53.4243	144.842	139.956	40.7955	0
277.863	106.342	63.7232	-11.4658	31.1449	97.3274	111.811	38.1341	50.3037	-161.744	157.679	-126.464	17.2205	118.635	-84.8953	0
278.862	104.366	-98.433	-91.4992	-105.384	-53.1572	-12.3067	-156.973	57.8897	112.276	-102.911	80.1355	62.2341	-4.83763	-71.4829	0
279.862	-166.534	-94.7738	-174.579	-60.1613	3.77191	96.3157	-71.1231	41.7327	-60.5511	-16.3786	0.793881	107.951	161.49	-174.811	0
280.861	80.084	-143.349	143.452	34.6688	-65.1491	84.2787	-87.0152	72.6367	141.509	-102.514	-150.449	-175.649	124.94	-45.0955	0
281.861	2.56667	-171.456	-164.969	-146.904	73.7167	147.493	-98.5351	-68.3752	175.907	154.714	92.7261	151.222	148.873	-108.682	0
282.86	-12.9792	-57.2088	-157.65	12.7679	160.01	94.7322	-128.332	130.063	121.578	-54.2594	164.383	-86.0992	150.484	97.007	0
283.86	140.952	141.517	-129.715	-98.406	32.8327	-13.6751	127.28	-131.925	-176.32	-175.975	125.28	45.4259	158.223	88.5858	0
284.859	-161.509	-37.7003	107.288	-170.267	-76.5063	-140.739	179.941	-89.9237	114.576	147.085	105.706	-126.976	133.248	151.641	0
285.859	-133.538	-143.154	-175.401	-162.799	-61.8865	23.0803	114.05	-139.175	-157.261	-140.729	94.469	164.308	148.503	-126.388	0
286.858	-157.314	160.658	-129.384	161.011	-93.9522	-130.049	-124.313	-147.6	139.516	101.564	41.6831	160.143	-158.894	-88.648	0
287.858	160.082	-157.081	-164.714	-177.203	-68.2403	-130.278	153.602	-61.2534	177.534	166.801	156.016	146.526	133.887	-70.0358	0
288.857	81.7275	-1.45924	-3.80272	-9.51351	-29.8751	-97.7597	-163.757	-117.805	-17.1259	-36.8145	-35.7306	-73.6029	111.121	-78.4808	0
289.857	-162.894	-75.3225	66.8507	76.455	-67.6525	151.102	90.2222	-45.2756	109.586	13.4305	-23.4279	-128.921	169.96	176.126	0
290.856	-14.0185	44.4897	-67.7855	98.4976	-26.831	-110.395	-127.395	-103.395	-143.318	172	-11.0979	99.6342	-145.95	136.905	0
291.856	-37.7915	-97.6157	53.2502	48.5162	-73.0071	-129.696	98.8301	-141.106	-120.939	16.9692	-105.906	163.956	92.5854	74.0352	0
292.855	149.177	-4.60488	102.674	-87.4037	-18.1672	-77.6391	81.1334	-79.4115	-18.4017	-150.808	102.353	-179.5	143.6	-50.8538	0
293.855	-138.312	-105.387	26.2358	-133.949	-79.8622	-120.977	48.6987	-171.218	98.7427	105.216	-72.9552	-156.802	159.894	115.693	0
294.854	-18.7957	21.4965	63.3559	-50.1302	-96.4121	-139.861	96.4171	88.7951	169.676	-27.4925	-73.4738	-173.301	101.683	-127.009	0
295.854	-144.888	12.581	-11.8129	-60.2285	-51.8946	-9.34928	117.121	-33.4391	157.971	147.429	62.9192	13.5682	122.85	-4.67534	0
296.853	-26.7096	-27.7828	-73.5728	40.2069	3.80426	-52.787	-20.1877	11.3	-146.629	85.0086	-7.18996	166.871	124.859	-23.959	0
297.853	-142.776	-148.68	-166.902	-97.9248	-82.3027	-165.185	179.638	62.2556	-157.01	177.548	-119.527	133.061	161.257	84.8892	0
298.852	-170.77	-86.8515	112.822	56.5447	-43.0886	-20.0883	52.1018	-139.641	94.158	149.119	115.534	-56.0176	166.422	-28.3916	0
299.852	105.12	148.666	-175.656	23.1497	-23.146	83.5573	51.8571	-45.2913	-101.062	129.499	129.863	153.013	106.42	27.0887	0
300.851	83.7088	100.704	141.052	-149.751	-59.554	-155.617	-43.7518	-145.503	178.927	123.5	2.15304	8.9762	97.673	-57.3571	0
301.851	-95.9713	-39.4262	54.0558	170.554	-8.99266	136.496	170.003	44.2176	176.36	26.4139	91.9602	-33.069	-40.8843	0.938114	0
302.85	90.3306	-112.319	98.5122	150.2	-30.5258	-147.075	177.157	41.2228	32.794	-36.1019	97.2607	-107.243	-160.515	-148.514	0
303.85	114.392	0.601697	-116.221	-138.167	15.0228	153.33	-9.40009	83.6533	94.4958	161.933	116.91	-24.2893	-148.452	-29.5737	0
304.849	124.105	1.38901	149.058	82.8533	0.398322	178.067	-9.60185	-72.9606	102.05	-64.3345	135.073	171.968	107.302	130.179	0
305.849	135.369	-64.0166	108.222	178.579	147.083	5.07283	149.81	151.332	-142.706	-140.975	-52.2557	-22.2977	163.389	86.5254	0
306.848	-20.8233	-45.7403	168.4	148.905	101.477	66.1	-71.7649	-154.046	-161.391	-118.163	51.07	-130.811	139.397	-112.34	0
307.848	-119.091	-45.254	35.2914	-147.434	0.653721	110.855	125.695	-103.882	125.041	-79.0285	148.994	-111.403	159.831	103.202	0
308.847	138.248	-7.49015	-12.9185	-148.088	-13.0914	98.1479	-87.8505	87.5327	121.456	8.94117	104.66	136.976	124.734	146.026	0
309.847	-73.4581	-71.2345	82.3608	135.834	34.9625	162.9	13.276	-163.751	167.548	88.4738	-30.1545	-141.463	158.082	99.1907	0
310.846	69.6983	-69.4361	-104.202	-49.8165	-38.6909	127.683	159.648	-110.333	126.748	-62.7461	41.3396	118.613	55.4933	8.81873	0
311.846	-75.5336	81.1575	-137.29	-68.9472	-75.6385	-176.185	39.891	-104.858	-174.673	-70.4012	158.093	157.788	101.683	-107.659	0
312.845	20.8151	102.044	86.1572	-10.2157	72.4896	83.1964	75.907	-151.467	84.1868	9.16578	-64.8499	17.5523	126.962	-113.26	0
313.845	153.268	-0.382501	163.333	-96.0321	-90.0224	-161.741	-104.206	-53.8429	92.3096	-135.936	-60.9898	109.158	163.136	-40.1281	0
314.844	-94.6393	-21.2839	113.305	-88.1586	-72.9075	136.502	-72.8859	22.1438	14.9339	-125.785	-97.459	-144.622	140.153	102.368	0
315.844	70.4891	-46.1577	170.549	34.6829	-15.521	52.1769	-150.154	-145.937	-150.468	-78.6288	-17.6169	3.51597	-166.505	-10.1646	0
316.843	-123.267	149.032	152.876	-54.3699	-49.6266	49.496	145.977	-28.9075	119.659	-116.127	-36.781	45.0279	142.297	-34.2091	0
317.843	109.667	-63.1855	172.153	2.46231	-40.8535	71.1184	-114.213	-83.9098	-137.012	-78.0864	111.444	-64.65	88.0189	-85.2773	0
318.842	122.694	60.213	112.148	132.871	-29.7258	-84.6934	-167.616	67.009	149.403	-129.136	-3.72501	-162.399	134.112	-68.4606	0
319.842	-48.253	-35.5193	-79.1224	-47.2196	-26.5216	-0.956654	6.67128	-13.0394	-75.3192	-121.88	58.4374	123.976	148.571	-153.284	0
320.841	94.5242	83.6836	129.225	159.551	-43.979	168.947	3.21057	53.5296	99.5934	-131.631	-40.3297	74.9994	-162.583	-118.674	0
321.841	150.994	130.079	105.608	-63.7123	-40.1434	118.694	149.881	-171.049	-85.2243	-35.2024	-48.3788	138.019	140.935	128.019	0
322.841	122.517	-56.1654	3.24585	-98.722	-6.64655	-62.5823	94.1308	90.9472	88.8838	-12.6885	124.774	-97.6399	-132.491	-150.608	0
323.84	-144.765	40.9045	-99.8819	96.549	91.6969	-50.2915	-174.302	136.899	75.3784	10.9203	50.8439	137.945	99.1309	30.2135	0
324.84	-119.79	179.856	-132.769	-156.997	-112.962	61.2291	167.998	145.666	-163.574	63.7653	-175.334	-130.246	152.739	171.847	0
325.839	165.14	143.728	-81.106	81.9382	-29.0833	95.5817	53.1901	-105.377	122.463	-10.3307	159.665	-168.628	168.303	-0.715033	0
326.839	107.813	47.604	173.904	-159.553	-19.7989	-65.6494	70.1066	-19.6666	116.553	-57.6479	-50.5001	61.718	148.164	173.745	0
327.838	173.765	171.46	23.3892	132.402	-99.632	12.9803	-166.226	111.834	93.9902	-63.3098	160.853	133.275	-173.115	102.699	0
328.838	-133.655	-137.521	156.22	57.659	-61.8791	9.25623	-49.9304	-102.171	167.379	-24.1226	-70.9787	-139.956	-179.343	-57.0201	0
329.837	-76.5979	21.7855	-156.845	-85.2587	107.397	134.198	104.492	0.703482	12.3352	80.0319	59.2614	-111.503	155.05	-131.763	0
330.837	-171.182	-54.3145	151.084	2.02695	-55.2826	-111.081	-153.379	-82.7506	176.217	134.715	7.53823	61.6926	109.255	179.977	0
331.836	90.2805	84.4125	-114.534	-132.598	-23.8395	-20.9132	41.3798	56.3559	110.318	163.295	-110.313	165.392	113.912	7.9114	0
332.836	73.1629	-119.487	150.208	36.3662	-93.6792	-96.5169	160.242	0.360715	73.7066	-23.4966	-26.7431	-89.0341	160.079	-80.5637	0
333.835	153.188	-144.02	89.8198	-93.5695	50.4067	172.847	133.249	-157.351	157.164	139.546	-128.129	102.998	-136.16	2.90831	0
334.835	171.401	17.7494	90.3987	-37.8439	-26.6167	35.6009	-83.5122	-92.1317	99.54	-63.1026	4.27106	131.079	154.53	17.1928	0
335.834	-89.5557	-1.44613	25.8165	168.016	-59.0788	81.1395	74.7433	-75.969	31.957	126.065	104.461	148.886	167.234	143.157	0
336.834	137.541	-55.063	-117.569	-50.6626	-91.4436	133.367	97.2617	-147.965	-109.377	-37.4446	-98.886	4.4326	154.22	-48.9461	0
337.833	-173.287	-17.3377	154.685	99.1041	31.336	135.381	68.7174	143.115	-29.8302	28.5286	95.8125	-161.591	152.844	9.36401	0
338.833	177.307	-46.7755	-120.992	111.668	-157.088	124.892	-116.36	75.0927	172.977	125.013	-27.7484	-119.762	135.312	-72.5041	0
339.832	179.197	-38.1674	-170.24	-112.732	2.20741	39.9746	143.429	-126.834	170	-110.53	43.7822	127.562	133.412	-112.496	0
340.832	-155.856	13.0122	-108.218	-74.4109	-107.074	-105.522	-22.6197	-77.5183	-169.493	94.2085	0.414031	-56.1638	134.415	165.101	0
341.831	133.578	-86.8644	-66.7061	-38.9016	137.806	-135.095	-9.86622	-158.763	-35.25	109.452	102.921	84.567	138.389	16.7765	0
342.831	156.149	-42.6827	-160.912	-86.2825	-40.6616	76.4901	8.56	-61.307	150.122	-121.365	-51.0365	133.451	167.532	142.783	0
343.83	15.5113	-38.785	-40.7183	-117.192	32.4403	-126.816	65.8595	-97.5607	126.657	-132.897	14.7095	96.447	135.122	114.686	0
344.83	-129.005	-61.9507	-172.585	-131.917	-51.0458	129.235	-72.3622	10.8336	-41.9821	122.95	20.6525	-101.039	126.935	-160.689	0
345.829	16.1377	40.8508	152.338	-37.5922	-46.9687	34.8202	62.4453	160.661	121.076	-159.582	-52.9137	97.239	143.528	-37.1998	0
346.829	104.888	30.7654	173.932	146.89	-42.9778	-92.9788	100.905	151.84	179.646	-177.604	-11.7994	-172.66	139.217	-177.961	0
347.828	-128.691	-47.2656	-112.823	-35.0472	33.8103	135.37	74.8799	-20.2091	116.921	125.053	-12.0434	132.755	-122.608	114.564	0
348.828	-142.433	-21.2307	114.012	84.6799	116.403	1.56524	-29.0572	24.9378	138.069	16.5514	2.07561	167.269	-148.554	10.6476	0
349.827	117.8	-34.5823	39.5347	167.812	22.9663	-30.6304	-134.264	-7.23401	43.9449	-140.099	114.368	46.8756	-150.976	42.5271	0
350.827	-160.806	-136.1	-48.1482	126.408	-14.2881	-160.346	1.61942	-179.606	68.1236	157.337	4.9467	-159.21	159.434	-178.34	0
351.826	124.335	103.549	99.7594	176.664	-24.9653	104.745	-58.0097	-73.1274	102.921	-105.348	-26.44	112.161	177.388	139.577	0
352.826	129.026	87.6095	154.481	136.912	142.614	144.702	-21.7557	112.963	155.633	-61.6555	149.014	-139.215	141.666	41.2437	0
353.825	95.6638	-174.085	159.45	-98.5969	-54.1697	-116.311	-130.887	-179.601	149.725	-83.4321	-138.87	-64.8039	-150.235	125.139	0
354.825	47.3637	-5.09868	-169.55	-114.736	-68.8541	88.6591	98.2445	-156.757	46.5624	67.5343	-145.071	82.3986	139.15	106.602	0
355.824	55.585	-32.9634	-177.855	-12.2129	-88.6882	90.654	-65.5723	84.5653	-150.102	64.156	-176.531	128.346	175.149	63.3354	0
356.824	126.788	-7.2876	115.271	79.9339	49.8412	-162.866	123.809	77.9632	-178.077	-125.72	-109.487	168.446	133.398	146.832	0
357.823	177.078	98.9614	137.027	33.5302	-109.711	-171.183	96.9501	-110.973	-43.6096	-38.5039	-116.698	171.955	158.519	18.9595	0
358.823	-127.56	-49.2328	-172.894	-95.9051	-32.9879	114.042	11.3724	59.864	126.307	-12.1771	-27.9537	-16.4531	132.817	45.2614	0
359.822	102.956	68.3191	100.863	104.748	-155.974	-150.375	-4.51604	-175.103	-97.7074	152.101	86.8156	-61.0335	115.304	93.8667	0
360.822	6.12801	170.25	169.085	35.1199	-11.8198	-44.4511	-23.1315	134.87	57.0622	-35.4407	24.1942	63.5081	154.221	17.8626	0
361.821	95.0938	15.4127	101.58	-179.469	11.4247	-120.938	-149.668	-117.867	149.368	67.1494	151.975	-139.983	-165.844	122.451	0
362.821	-146.971	-47.6373	24.5005	-177.232	-41.9504	155.942	38.3339	176.191	-173.833	165.817	-15.7989	-159.479	127.434	-120.438	0
363.82	158.416	-89.273	143.022	-18.3823	18.8022	-49.2816	77.9065	27.4414	-92.7051	106.16	-71.2462	-3.87267	-173.168	77.4798	0
364.82	142.719	-165.353	147.442	116.275	14.3144	143.397	-137.674	-67.9719	-172.6	24.5914	-142.61	175.926	171.363	-113.603	0
365.819	170.227	136.114	98.0841	-25.2193	-33.7334	-120.948	29.1291	153.297	161.715	-143.036	179.257	160.51	-174.903	19.29	0
366.819	-161.476	-172.232	171.78	148.871	-37.3293	145.236	77.7608	92.1592	-137.777	-174.678	22.1515	-84.8578	168.269	-74.8177	0
367.818	83.0056	5.15429	119.082	-27.7755	-29.6339	-152.192	65.7931	-23.7598	89.274	96.397	145.085	45.5505	149.099	-149.193	0
368.818	-18.8752	-38.1407	45.012	-137.229	-113.819	48.3141	93.9985	-145.691	172.683	-47.5688	123.734	110.178	144.627	-101.747	0
369.817	148.263	-146.021	63.7644	-102.352	-65.5662	-117.024	115.517	10.7377	-137.013	-152.061	55.5911	139.665	141.87	93.4063	0
370.817	138.213	-43.6138	-146.773	33.6459	-75.772	178.124	134.763	161.77	44.1524	-24.6366	-92.1309	20.1827	164.175	-111.446	0
371.816	136.229	-122.536	170.085	-13.2217	-6.3372	18.8103	59.0687	-160.02	161.801	158.094	37.3567	-176.113	142.774	143.444	0
372.816	146.34	12.7882	-73.1028	36.0191	-39.3023	-65.3384	-144.663	156.374	36.5275	-129.816	-164.293	61.0275	143.986	-148.494	0
373.815	31.3778	78.9535	173.989	-95.2979	-30.9677	-7.31798	172.265	-134.118	-128.166	-135.78	47.1361	84.4396	132.279	127.803	0
374.815	-124.299	117.593	166.239	-115.21	-34.313	-23.4185	-112.971	32.1598	-166.179	-160.967	-115.413	-6.959	146.607	-30.0776	0
375.814	-95.8935	-95.8209	-68.8718	66.3897	19.3823	-171.843	-157.304	99.2433	164.895	49.6129	122.491	-166.228	164.563	-105.56	0
376.814	-121.408	-3.5467	-147.782	-74.999	-77.6947	-157.805	-168.208	-66.0545	135.321	-94.9304	18.8145	115.804	131.178	157.001	0
377.813	170.586	-16.6956	156.512	82.9583	120.428	-165.599	-135.641	-1.8433	-120.638	150.006	-116.645	92.1776	123.529	-1.09715	0
378.813	153.577	-150.421	-70.7692	-51.6349	178.922	139.69	6.82395	-37.7913	120.447	-155.362	-11.2685	4.1493	-166.313	121.797	0
379.812	-126.561	-43.2027	-119.061	75.2415	-15.6986	-39.6844	-29.5375	165.51	137.608	98.1398	-34.8081	7.04473	129.228	53.7824	0
380.812	174.978	79.5797	171.61	-117.195	-86.6484	-134.604	-178.051	-143.654	-86.8758	52.5672	112.546	35.1181	120.734	21.6466	0
381.811	-165.878	-133.244	129.304	-13.966	74.9837	132.705	-115.896	-134.882	-169.307	142.72	99.2265	133.649	105.557	1.72029	0
382.811	131.15	26.8927	118.815	-54.3012	51.7165	-127.99	-111.184	-43.5118	110.336	-28.7553	150.261	-28.0718	173.245	140.629	0
383.81	169.165	2.63765	116.936	64.9266	14.9114	21.555	-36.3799	-78.4753	168.905	165.102	122.221	127.6	-159.039	141.279	0
384.81	154.864	-9.61189	117.137	24.9865	-32.081	-32.4343	152.489	-110.538	61.7313	34.6234	-8.30904	-103.979	160.701	-162.806	0
385.809	-123.033	-50.086	33.8464	42.1492	-16.7933	69.6338	10.7973	-112.105	76.4747	163.607	9.31706	147.947	139.864	81.5956	0
386.809	143.167	80.0438	-163.445	-67.9717	-0.847802	-63.9312	129.477	-8.83374	134.649	165.758	170.242	-124.679	145.3	-171.312	0
387.808	141.271	-60.4055	160.728	-104.366	-38.4721	142.619	-111.621	76.7502	-134.122	-112.46	108.58	-161.119	149.079	113.482	0
388.808	56.2626	-27.6721	-45.0489	-31.5212	-97.9546	-146.899	-154.764	57.5715	120.703	-133.306	42.04	127.001	139.708	-110.539	0
389.807	146.577	-175.628	-175.5	22.964	-31.3877	-45.5866	-18.0769	-59.0344	147.865	-59.9532	-104.62	135.121	172.355	137.574	0
390.807	142.762	-44.7415	-1.22563	-59.3599	134.164	32.5949	-109.111	176.811	117.056	-132.399	90.4442	117.982	-159.072	-127.411	0
391.806	163.357	-56.0292	87.0774	-111.861	-7.04702	48.6431	-141.245	60.8141	-104.452	89.0429	146.217	-79.5876	-161.467	110.342	0
392.806	142.144	-25.6386	135.084	22.8592	-115.749	27.3955	-133.515	-171.716	103.383	136.778	-175.498	-120.431	96.203	140.098	0
393.805	122.281	23.3686	177.16	-5.39345	45.6249	73.8231	97.089	-112.336	-150.928	36.007	-29.5117	111.6	160.692	-25.9506	0
394.805	132.09	-83.725	-80.8803	-135.393	-77.4109	77.1917	3.6429	-0.0487067	172.904	114.154	15.9245	112.811	157.273	27.0159	0
395.804	-3.60053	14.7346	-148.687	22.1939	-49.7906	-143.101	5.34995	-133.969	-163.173	-15.8232	53.8164	-152.243	148.092	-23.0826	0
396.804	85.7222	80.592	-142.323	-58.919	-30.583	124.101	101.446	-177.565	111.059	-0.159039	-88.9454	-70.2509	138.872	52.5696	0
397.803	105.178	7.10344	79.397	155.013	-33.2765	38.5881	-122.455	-70.3098	80.3197	-88.4419	-51.0033	-112.47	-166.478	154.482	0
398.803	112.427	-55.8302	-105.488	-12.1588	13.7385	151.636	69.0923	153.293	-169.077	49.2148	-98.8235	-147.573	166.174	5.0558	0
399.803	94.1213	-14.352	150.615	-88.9912	-50.8908	-176.393	79.7973	-88.3993	133.362	169.986	175.804	87.0062	171.907	72.2102	0
400.802	129.167	61.676	131.585	166.157	-48.5222	-88.7253	-122.658	-141.564	84.0572	22.4246	-93.5429	-75.8726	-155.415	172.676	0
401.802	-160.183	-128.603	-171.406	-32.2987	-66.2218	-95.9295	126.031	-18.8318	138.913	-171.372	28.9722	-169.692	171.946	-62.5761	0
402.801	135.608	173.03	134.976	-167.109	-122.22	34.952	34.761	-54.9391	107.713	124.806	-177.51	-37.7683	147.844	61.3732	0
403.801	-136.305	28.7645	98.2247	104.457	-53.3895	161.905	-148.193	100.23	-174.742	178.39	-109.545	96.4499	157.373	-26.5839	0
404.8	-15.1505	146.806	109.687	28.8351	52.2392	-38.508	122.608	-115.72	112.958	-21.8349	94.7962	144.821	151.192	-104.507	0
405.8	139.544	120.959	-51.6443	-159.651	-21.078	-158.609	-83.0071	-24.6829	119.465	-25.8604	13.2273	-178.042	-179.255	7.83567	0
406.799	-130.242	-94.7432	-93.1418	-55.7407	-11.4781	169.932	176.379	-138.651	152.946	18.1352	77.5119	114.749	138.783	15.7957	0
407.799	-159.445	33.1962	16.1617	51.4553	12.451	126.364	1.67219	143.065	167.01	129.229	10.3599	141.213	173.706	129.675	0
408.798	28.9821	68.242	128.046	-102.613	-0.884159	79.8945	-118.1	-172.758	-166.177	144.707	-102.687	172.373	169.49	79.6812	0
409.798	-124.907	-41.8927	144.479	38.2317	158.218	-109.427	99.3189	-159.631	87.0213	85.6974	-158.005	-170.698	162.439	-54.927	0
410.797	69.8051	-139.832	149.701	6.13388	80.8614	-162.136	29.9661	-125.727	67.6136	49.3389	-71.9532	-152.893	163.062	-57.7829	0
411.797	-117.227	121.469	109.202	69.6655	-81.2124	-165.76	-99.1812	8.87947	-161.583	55.7718	-163.299	138.09	156.547	127.353	0
412.796	-151.001	-162.409	-149.702	-24.2026	-47.5471	178.769	9.06172	92.2142	137.972	174.131	179.783	169.059	144.739	-114.247	0
413.796	-176.473	-99.0478	154.84	-44.4532	26.9208	160.464	30.0045	-156.864	171.273	-161.285	-141.507	17.9258	-141.08	33.8614	0
414.795	162.387	-119.995	-42.7832	21.0128	-12.9324	22.247	27.4575	14.0491	71.9421	158.979	18.2344	105.84	144.017	-113.631	0
415.795	-31.6032	58.8727	-127.478	-14.9638	-6.40061	-173.383	140.891	-85.1756	-77.1209	-146.217	73.7664	68.2237	128.723	83.3449	0
416.794	90.8276	51.29	133.413	-116.876	12.0139	-144.234	143.453	-96.5639	142.363	68.9519	-129.442	-35.4703	169.486	5.53384	0
417.794	-157.736	-49.6677	138.335	-4.30081	6.5862	101.1	35.1011	13.4848	154.498	-109.885	-39.8754	-169.833	166.533	44.0594	0
418.793	148.745	-88.7071	167.523	10.9492	-77.8593	1.99203	-92.2024	161.634	-121.017	-101.969	-84.9019	-107.513	164.457	-121.155	0
419.793	-138.951	-14.4976	69.9081	149.28	48.3334	172.669	79.6084	-62.4107	175.52	-172.766	8.78792	60.2978	-168.604	-169.098	0
420.792	-69.2142	-159.879	-138.741	0.306494	64.5208	-122.742	-83.0382	-104.101	97.7458	-48.5202	-115.441	55.5367	-177.973	52.0973	0
421.792	161.969	65.7887	81.017	-8.31347	-20.7797	66.2535	-130.546	-83.5373	-169.832	-146.591	178.735	-132.407	161.008	157.971	0
422.791	142.205	12.373	73.0329	-32.919	-63.3949	-176.367	137.094	4.65826	20.28	-160.398	-171.852	-175.106	177.112	111.816	0
423.791	95.4048	-29.2567	107.762	-27.0048	43.7715	-97.7814	-130.611	-43.7329	-33.1795	2.24946	-6.8109	-47.4353	131.162	29.9533	0
424.79	176.572	-70.7892	-139.14	69.4203	-74.6385	4.2478	119.711	-91.6011	50.2037	63.2067	-29.0459	145.602	160.625	62.1617	0
425.79	118.641	-170.902	-137.862	89.0441	33.5388	159.522	71.6263	25.9364	151.105	130.489	-177.997	-168.572	168.793	8.78572	0
426.789	-136.735	-149.585	-156.868	129.557	16.7667	-27.4864	-16.3498	-156.581	151.429	-111.675	-146.865	-104.553	-162.885	8.46799	0
427.789	-173.52	-103	122.148	61.8421	13.1787	-21.5124	92.9647	-122.551	105.289	168.475	0.863131	-147.633	164.311	-48.6645	0
428.788	116.023	49.2924	177.926	44.111	20.2384	18.0934	-75.8256	88.4081	-69.774	131.115	-178.465	149.49	147.34	30.5234	0
429.788	169.924	-50.9522	175.927	-94.9199	-68.3098	-142.572	116.63	16.6831	-92.8114	85.4322	160.867	-132.63	-169.909	3.80357	0
430.787	54.6238	126.88	-154.019	-76.4814	-78.9777	-94.122	26.2543	137.191	-170.58	-8.61159	-74.1247	57.4285	-171.982	-133.207	0
431.787	178.194	-25.3739	138.143	-137.697	-13.9639	142.917	-65.9102	-140.666	-95.8201	42.3296	-14.7528	174.801	150.803	59.0989	0
432.786	118.86	-162.684	-170.832	156.203	-37.8606	-133.861	-144.732	-127.609	-148.607	-178.068	-169.846	-129.968	-171.247	-72.3789	0
433.786	167.899	-14.159	18.7246	-5.75638	-19.0013	-171.517	-165.784	105.232	176.095	-5.73004	-139.779	136.302	170.749	-169.187	0
434.785	118.579	27.9577	-127.678	137.717	-48.9587	113.204	-130.988	66.0219	-137.439	-11.921	150.988	127.642	153.232	-95.8428	0
435.785	145.776	-37.5482	151.308	136.672	-63.0626	-3.86525	-69.2471	-94.7313	-124.583	-81.0203	-165.804	-134.426	137.414	151.189	0
436.784	-172.012	-173.407	158.223	-14.1928	-12.5151	-169.729	-37.4265	-31.9794	88.8586	-75.2054	83.5527	62.4222	154.689	83.6398	0
437.784	-94.8988	-23.7187	85.6205	-164.77	-33.8019	-51.2932	-38.7557	-59.7937	-169.273	8.40967	125.01	62.6937	178.379	174.713	0
438.783	-154.89	30.8505	-172.922	-61.2485	30.8436	-125.15	-54.495	34.7005	168.207	-79.6147	-137.707	156.641	-143.816	17.4069	0
439.783	-147.739	-71.4683	163.084	-62.322	45.8477	-131.631	-92.8349	-72.6968	-141.381	159.263	157.96	-164.311	-166.882	-140.387	0
440.782	153.724	-40.0608	147.717	-32.1666	14.6738	177.065	70.2408	-61.3576	-160.153	104.23	178.037	64.8297	-178.231	172.629	0
441.782	24.0854	127.684	164.124	3.498	-32.6471	-110.505	69.9218	-175.683	171.55	-137.488	139.778	170.415	178.048	125.431	0
442.781	161.37	-4.08753	135.021	-125.615	-88.8445	-41.1408	-124.939	-107.887	-132.106	134.163	117.202	145.883	178.028	110.452	0
443.781	161.897	15.4315	92.5665	-176.737	-6.20865	36.6224	-130.695	-179.662	149.536	129.927	-105.385	-169.346	-177.512	-88.2078	0
444.78	95.3582	90.5148	-172.246	138.219	-47.5776	112.773	16.0674	-71.6234	-165.506	-145.699	-123.014	-177.622	172.607	-65.3768	0
445.78	165.002	34.7644	149.641	118.019	-24.4148	38.0604	-140.589	-48.2112	-167.57	111.314	55.9658	-93.2264	158.644	-8.2712	0
446.779	-154.298	-58.1805	167.596	59.087	31.6563	-112.781	177.854	-65.0272	-136.313	94.8618	29.3188	-125.248	-157.071	127.987	0
447.779	-170.143	26.7747	179.703	111.945	-0.543183	75.5537	62.4395	5.94921	154.768	125.107	-106.491	-74.2623	165.044	-72.0472	0
448.778	-33.1808	90.8766	-71.8449	-169.601	-28.4516	-96.3268	-72.903	-31.1465	128.041	-95.2409	-8.79607	48.0713	173.877	136.924	0
449.778	-148.913	-108.236	-72.3309	-96.227	19.9404	-101.563	-38.3877	-34.6473	-110.433	139.529	-36.9447	94.0689	175.896	-34.6104	0
450.777	116.234	-11.2129	117.03	-94.2944	30.756	-117.676	-152.454	-103.845	108.943	113.11	-20.1405	-7.24421	146.849	66.3545	0
451.777	136.159	97.7085	-174.52	9.98901	-19.8643	179.717	67.4874	55.618	161.152	17.0346	-77.471	-93.3991	170.186	-173.141	0
452.776	126.939	151.566	93.2774	-171.788	14.5907	170.109	30.1567	-123.673	103.406	-36.9888	-87.4396	-122.405	-167.007	-43.8483	0
453.776	159.488	-11.6069	171.653	173.285	85.1695	-173.636	62.6891	-15.0231	-149.472	-131.335	73.1034	-132.22	150.545	92.8913	0
454.775	115.091	133.323	-131.482	143.207	-44.5229	169.803	6.96538	-161.253	124.591	14.714	-9.31472	-119.119	-154.242	-19.0871	0
455.775	149.439	-70.0162	166.137	45.4464	-14.6914	93.5264	76.2497	100.712	102.16	-125.549	106.05	-158.981	156.184	-75.6317	0
456.774	167.489	-136.122	120.65	-70.9813	-41.1593	117.927	174.1	17.3863	160.172	42.9785	0.449908	-177.316	157.989	-65.8006	0
457.774	123.609	107.983	20.0159	92.9891	-14.0737	170.027	-111.236	111.054	-127.748	166.179	48.0251	156.386	-178.771	57.9618	0
458.773	-98.2948	-21.2396	126.925	-5.74608	0.553776	19.5505	-62.1271	78.7651	138.042	-93.3077	-162.725	-155.653	-175.867	-164.71	0
459.773	-77.9067	-80.3129	-47.1216	-158.299	-8.96808	24.1409	-111.353	-24.1099	132.669	-100.7	-173.448	90.514	146.346	-56.2929	0
460.772	158.643	43.6067	153.736	-65.3765	2.14132	80.5594	2.23643	-178.156	133.004	-9.04945	11.8539	-164.682	-170.969	-82.6016	0
461.772	177.322	78.1171	136.603	-138.008	-42.5725	-161.772	111.121	44.2417	128.368	-66.9646	46.6831	-128.785	167.161	-38.6999	0
462.771	123.852	142.668	130.971	-156.595	-17.5997	-134.251	-45.5803	-119.522	-104.053	1.21898	115.536	-171.936	177.66	-79.9593	0
463.771	-17.5684	-112.33	114.993	117.134	-32.7661	-89.1873	155.616	93.5143	92.0944	33.911	138.429	154.068	178.26	11.9203	0
464.77	122.106	141.689	-65.7158	115.376	2.18411	67.2357	73.4846	7.6197	94.7329	-48.4682	51.5169	-126.537	171.105	114.658	0
465.77	-26.973	-124.258	140.285	-127.517	-11.7758	-4.23232	111.996	117.218	118.23	-77.4246	-98.5609	-136.081	176.2	-118.746	0
466.769	-174.683	41.5519	174.333	-130.38	21.1265	-144.656	94.9649	-127.361	-160.3	6.61955	-50.6617	122.318	-172.793	75.7455	0
467.769	127.498	58.2779	-115.416	30.2707	7.36331	167.412	44.4569	-114.498	-125.903	-88.7687	28.9101	70.2148	162.499	45.4973	0
468.768	165.036	-100.261	157.708	-24.0446	11.4202	-27.3619	-77.9867	-89.8023	-146.836	20.2151	-9.92233	129.69	154.196	-89.572	0
469.768	-96.2368	8.02932	135.141	177.715	33.2099	-154.005	128.135	-47.715	-140.071	119.55	145.057	-106.877	149.752	-175.945	0
470.767	153.107	172.531	-131.625	-30.0353	28.7794	122.296	69.1349	74.1952	135.874	-162.327	-140.426	143.103	-169.813	-51.4532	0
471.767	130.589	63.3702	-162.835	-75.0831	24.374	-153.951	129.026	141.275	-136.599	-85.4397	-117.019	81.8754	153.636	48.9146	0
472.766	-165.994	-59.279	-135.514	41.6431	0.776497	-120.802	125.686	126.649	-155.5	-97.6652	-107.965	3.74874	176.982	-106.035	0
473.766	-160.514	102.289	-155.689	119.725	-35.6932	79.1354	-39.0923	106.493	94.3335	-71.3936	-96.8144	-121.102	-129.925	-63.5624	0
474.765	-126.716	-53.7007	122.069	145.75	7.72682	-54.8132	70.7619	113.655	106.459	-40.8755	-177.123	87.5981	165.235	15.8217	0
475.765	-138.046	0.926415	84.0997	145.679	-71.8806	69.8583	-53.9082	-115.746	169.301	-60.1175	-128.706	-154.679	179.317	-68.1769	0
476.764	161.737	-55.4944	-110.572	107.195	60.1811	-99.2209	161.705	140.082	-45.0184	-18.7608	-55.9287	-86.7662	141.006	36.1252	0
477.764	167.382	54.6433	107.706	35.4073	-30.5711	-178.825	-17.7022	-178.169	117.192	9.60688	157.696	120.248	163.877	33.1936	0
478.763	151.362	169.176	-159.532	-36.9207	-19.9638	79.3437	-51.7706	-129.552	115.578	131.609	-141.168	-160.472	150.376	-137.394	0
479.763	37.7881	132.575	67.1361	45.4023	14.1431	-53.8494	-120.992	-32.8368	159.168	160.103	-118.952	56.2227	-163.27	117.617	0
480.762	154.91	124.838	179.456	-154.986	27.0849	-91.2276	127.538	-64.7762	179.709	85.7555	-131.642	-167.864	-168.024	-19.8478	0
481.762	-167.064	-50.0026	141.089	47.7448	-169.16	-43.0709	89.9573	115.996	136.376	25.8306	147.948	-39.2822	172.273	-73.1055	0
482.762	-164.131	-161.652	-165.377	170.938	32.3486	-103.977	72.6071	-38.2546	-113.328	61.6338	98.038	-48.1279	-159.84	119.342	0
483.761	-132.514	-163.22	68.2818	23.5427	-1.4904	-99.0873	42.2044	125.857	162.709	41.2177	-122.884	-101.357	179.01	23.6714	0
484.761	-174.2	90.0393	15.6727	-11.423	31.0286	-151.894	157.076	161.913	-127.038	-148.2	52.6067	162.29	-177.004	-103.492	0
485.76	-176.26	50.7824	-108.659	-73.4631	-113.31	14.3279	-148.675	-176.863	174.491	-61.9457	-175.465	-133.164	-176.748	99.7625	0
486.76	113.423	108.598	177.235	-28.5009	157.911	-142.472	42.0623	-155.647	-176.065	66.6729	106.956	-131.287	173.64	71.1907	0
487.759	-123.279	156.36	127.586	-91.3673	62.9603	-128.881	9.54346	107.638	160.99	-15.3462	14.0437	-144.984	-178.316	9.19097	0
488.759	156.284	1.44134	88.8967	-113.345	3.11666	54.6306	62.6381	102.484	-167.319	-167.452	44.7785	177.284	-176.909	80.9105	0
489.758	-127.869	73.6262	153.914	101.19	12.2377	-113.478	44.4053	89.6064	-114.524	-179.472	145.399	-98.795	176.328	-38.2852	0
490.758	116.761	56.5834	-28.9265	123.765	-20.2659	26.7626	-78.473	150.606	-136.271	96.5302	9.00855	-139.892	-178.706	-69.6403	0
491.757	-93.1351	127.083	-59.921	127.47	-16.7065	170.166	-36.0385	82.4787	70.8587	110.336	-168.803	175.954	151.561	138.51	0
492.757	-155.637	48.5261	140.068	98.7178	-20.5068	-107.594	-14.4798	-56.135	-166.681	60.6214	174.079	-152.831	-177.52	157.925	0
493.756	-162.495	96.9236	158.223	-12.8025	7.2677	-127.314	43.4985	-178.008	-131.434	73.1182	-165.375	23.0603	176.725	-63.6193	0
494.756	-120.818	149.058	175.153	75.8207	-17.0583	-72.6487	161.981	-5.68726	-177.496	-50.0613	-113.44	122.847	159.034	83.7973	0
495.755	-171.919	64.0315	156.657	4.77869	-5.34616	-106.097	-42.3727	38.5817	-97.9071	-120.765	-129.219	-170.746	-159.642	99.2663	0
496.755	169.489	12.6028	154.428	166.082	10.5611	64.2268	115.156	-22.3064	98.9476	-176	103.293	173.559	179.354	-8.38861	0
497.754	-175.987	111.239	-169.535	135.167	23.2342	-149.095	-17.248	6.87248	166.196	-47.0216	50.2215	-104.914	165.226	-68.6103	0
498.754	-125.46	104.693	173.058	69.5781	5.26871	78.8527	172.388	-93.638	-134.063	-29.499	-34.9997	-129.704	174.012	-39.784	0
499.753	156.794	30.9019	-174.165	103.442	-25.018	171.313	97.1818	-125.049	99.469	49.0539	-96.981	-79.4642	-170.238	-143.06	0
500.753	-176.566	57.8536	66.4215	83.6937	-31.0049	42.5684	-19.0329	9.53641	-169.729	-124.118	-131.975	101.986	-159.627	-50.6032	0
501.752	156.02	-128.809	-158.123	-157.816	45.921	137.173	-117.992	-32.1102	108.195	-147.121	108.016	-157.744	154.911	9.05796	0
502.752	159.298	-39.7368	179.855	-12.9214	-111.222	175.521	42.3278	71.7718	168.603	-109.646	-71.5663	-166.756	138.583	-96.8639	0
503.751	-148.022	-38.2829	72.3558	26.9667	-0.415635	-99.8645	-61.6761	44.7682	154.447	-132.668	150.672	-98.9623	171.261	-166.948	0
504.751	162.939	-12.5988	141.089	-12.4392	-11.0553	-97.9091	164.54	-22.4117	142.864	119.848	32.2259	-164.672	161.507	-133.064	0
505.75	-62.9537	-34.5091	140.916	-155.758	74.4411	-163.221	41.6039	109.481	-166.657	-26.3404	-42.5701	-66.4662	166.483	117.817	0
506.75	152.348	-12.6634	174.631	20.1545	38.4783	-162.931	35.9986	-69.255	109.768	-8.26887	-168.133	161.066	164.405	-70.482	0
507.749	-176.47	0.890193	114.76	-56.6172	-22.6316	25.5302	94.8417	6.32395	165.615	-156.726	128.827	-158.6	-166.425	60.425	0
508.749	137.295	-178.498	171.204	39.3548	-40.0499	-174.039	-121.172	-63.8428	-91.8578	-3.55849	-140.429	-144.946	-164.583	-59.0778	0
509.748	173.633	-12.4541	172.202	29.9859	6.64603	120.137	121.849	161.106	-160.608	-57.6973	-56.5995	-171.942	160.485	-8.42523	0
510.748	30.8995	70.9499	-150.506	-31.2842	-25.653	10.7715	130.93	0.67823	131.657	160.071	-25.4957	141.923	176.212	-120.533	0
511.747	180	0	180	180	0	180	0	180	180	0	180	180	180	180	0
512.747	-30.8995	-70.9499	150.506	31.2842	25.653	-10.7715	-130.93	-0.67823	-131.657	-160.071	25.4957	-141.923	-176.212	120.533	0
513.746	-173.633	12.4541	-172.202	-29.9859	-6.64603	-120.137	-121.849	-161.106	160.608	57.6973	56.5995	171.942	-160.485	8.42523	0
514.746	-137.295	178.498	-171.204	-39.3548	40.0499	174.039	121.172	63.8428	91.8578	3.55849	140.429	144.946	164.583	59.0778	0
515.745	176.47	-0.890193	-114.76	56.6172	22.6316	-25.5302	-94.8417	-6.32395	-165.615	156.726	-128.827	158.6	166.425	-60.425	0
516.745	-152.348	12.6634	-174.631	-20.1545	-38.4783	162.931	-35.9986	69.255	-109.768	8.26887	168.133	-161.066	-164.405	70.482	0
517.744	62.9537	34.5091	-140.916	155.758	-74.4411	163.221	-41.6039	-109.481	166.657	26.3404	42.5701	66.4662	-166.483	-117.817	0
518.744	-162.939	12.5988	-141.089	12.4392	11.0553	97.9091	-164.54	22.4117	-142.864	-119.848	-32.2259	164.672	-161.507	133.064	0
519.743	148.022	38.2829	-72.3558	-26.9667	0.415635	99.8645	61.6761	-44.7682	-154.447	132.668	-150.672	98.9623	-171.261	166.948	0
520.743	-159.298	39.7368	-179.855	12.9214	111.222	-175.521	-42.3278	-71.7718	-168.603	109.646	71.5663	166.756	-138.583	96.8639	0
521.742	-156.02	128.809	158.123	157.816	-45.921	-137.173	117.992	32.1102	-108.195	147.121	-108.016	157.744	-154.911	-9.05796	0
522.742	176.566	-57.8536	-66.4215	-83.6937	31.0049	-42.5684	19.0329	-9.53641	169.729	124.118	131.975	-101.986	159.627	50.6032	0
523.741	-156.794	-30.9019	174.165	-103.442	25.018	-171.313	-97.1818	125.049	-99.469	-49.0539	96.981	79.4642	170.238	143.06	0
524.741	125.46	-104.693	-173.058	-69.5781	-5.26871	-78.8527	-172.388	93.638	134.063	29.499	34.9997	129.704	-174.012	39.784	0
525.74	175.987	-111.239	169.535	-135.167	-23.2342	149.095	17.248	-6.87248	-166.196	47.0216	-50.2215	104.914	-165.226	68.6103	0
526.74	-169.489	-12.6028	-154.428	-166.082	-10.5611	-64.2268	-115.156	22.3064	-98.9476	176	-103.293	-173.559	-179.354	8.38861	0
527.739	171.919	-64.0315	-156.657	-4.77869	5.34616	106.097	42.3727	-38.5817	97.9071	120.765	129.219	170.746	159.642	-99.2663	0
528.739	120.818	-149.058	-175.153	-75.8207	17.0583	72.6487	-161.981	5.68726	177.496	50.0613	113.44	-122.847	-159.034	-83.7973	0
529.738	162.495	-96.9236	-158.223	12.8025	-7.2677	127.314	-43.4985	178.008	131.434	-73.1182	165.375	-23.0603	-176.725	63.6193	0
530.738	155.637	-48.5261	-140.068	-98.7178	20.5068	107.594	14.4798	56.135	166.681	-60.6214	-174.079	152.831	177.52	-157.925	0
531.737	93.1351	-127.083	59.921	-127.47	16.7065	-170.166	36.0385	-82.4787	-70.8587	-110.336	168.803	-175.954	-151.561	-138.51	0
532.737	-116.761	-56.5834	28.9265	-123.765	20.2659	-26.7626	78.473	-150.606	136.271	-96.5302	-9.00855	139.892	178.706	69.6403	0
533.736	127.869	-73.6262	-153.914	-101.19	-12.2377	113.478	-44.4053	-89.6064	114.524	179.472	-145.399	98.795	-176.328	38.2852	0
534.736	-156.284	-1.44134	-88.8967	113.345	-3.11666	-54.6306	-62.6381	-102.484	167.319	167.452	-44.7785	-177.284	176.909	-80.9105	0
535.735	123.279	-156.36	-127.586	91.3673	-62.9603	128.881	-9.54346	-107.638	-160.99	15.3462	-14.0437	144.984	178.316	-9.19097	0
536.735	-113.423	-108.598	-177.235	28.5009	-157.911	142.472	-42.0623	155.647	176.065	-66.6729	-106.956	131.287	-173.64	-71.1907	0
537.734	176.26	-50.7824	108.659	73.4631	113.31	-14.3279	148.675	176.863	-174.491	61.9457	175.465	133.164	176.748	-99.7625	0
538.734	174.2	-90.0393	-15.6727	11.423	-31.0286	151.894	-157.076	-161.913	127.038	148.2	-52.6067	-162.29	177.004	103.492	0
539.733	132.514	163.22	-68.2818	-23.5427	1.4904	99.0873	-42.2044	-125.857	-162.709	-41.2177	122.884	101.357	-179.01	-23.6714	0
540.733	164.131	161.652	165.377	-170.938	-32.3486	103.977	-72.6071	38.2546	113.328	-61.6338	-98.038	48.1279	159.84	-119.342	0
541.732	167.064	50.0026	-141.089	-47.7448	169.16	43.0709	-89.9573	-115.996	-136.376	-25.8306	-147.948	39.2822	-172.273	73.1055	0
542.732	-154.91	-124.838	-179.456	154.986	-27.0849	91.2276	-127.538	64.7762	-179.709	-85.7555	131.642	167.864	168.024	19.8478	0
543.731	-37.7881	-132.575	-67.1361	-45.4023	-14.1431	53.8494	120.992	32.8368	-159.168	-160.103	118.952	-56.2227	163.27	-117.617	0
544.731	-151.362	-169.176	159.532	36.9207	19.9638	-79.3437	51.7706	129.552	-115.578	-131.609	141.168	160.472	-150.376	137.394	0
545.73	-167.382	-54.6433	-107.706	-35.4073	30.5711	178.825	17.7022	178.169	-117.192	-9.60688	-157.696	-120.248	-163.877	-33.1936	0
546.73	-161.737	55.4944	110.572	-107.195	-60.1811	99.2209	-161.705	-140.082	45.0184	18.7608	55.9287	86.7662	-141.006	-36.1252	0
547.729	138.046	-0.926415	-84.0997	-145.679	71.8806	-69.8583	53.9082	115.746	-169.301	60.1175	128.706	154.679	-179.317	68.1769	0
548.729	126.716	53.7007	-122.069	-145.75	-7.72682	54.8132	-70.7619	-113.655	-106.459	40.8755	177.123	-87.5981	-165.235	-15.8217	0
549.728	160.514	-102.289	155.689	-119.725	35.6932	-79.1354	39.0923	-106.493	-94.3335	71.3936	96.8144	121.102	129.925	63.5624	0
550.728	165.994	59.279	135.514	-41.6431	-0.776497	120.802	-125.686	-126.649	155.5	97.6652	107.965	-3.74874	-176.982	106.035	0
551.727	-130.589	-63.3702	162.835	75.0831	-24.374	153.951	-129.026	-141.275	136.599	85.4397	117.019	-81.8754	-153.636	-48.9146	0
552.727	-153.107	-172.531	131.625	30.0353	-28.7794	-122.296	-69.1349	-74.1952	-135.874	162.327	140.426	-143.103	169.813	51.4532	0
553.726	96.2368	-8.02932	-135.141	-177.715	-33.2099	154.005	-128.135	47.715	140.071	-119.55	-145.057	106.877	-149.752	175.945	0
554.726	-165.036	100.261	-157.708	24.0446	-11.4202	27.3619	77.9867	89.8023	146.836	-20.2151	9.92233	-129.69	-154.196	89.572	0
555.725	-127.498	-58.2779	115.416	-30.2707	-7.36331	-167.412	-44.4569	114.498	125.903	88.7687	-28.9101	-70.2148	-162.499	-45.4973	0
556.725	174.683	-41.5519	-174.333	130.38	-21.1265	144.656	-94.9649	127.361	160.3	-6.61955	50.6617	-122.318	172.793	-75.7455	0
557.724	26.973	124.258	-140.285	127.517	11.7758	4.23232	-111.996	-117.218	-118.23	77.4246	98.5609	136.081	-176.2	118.746	0
558.724	-122.106	-141.689	65.7158	-115.376	-2.18411	-67.2357	-73.4846	-7.6197	-94.7329	48.4682	-51.5169	126.537	-171.105	-114.658	0
559.723	17.5684	112.33	-114.993	-117.134	32.7661	89.1873	-155.616	-93.5143	-92.0944	-33.911	-138.429	-154.068	-178.26	-11.9203	0
560.723	-123.852	-142.668	-130.971	156.595	17.5997	134.251	45.5803	119.522	104.053	-1.21898	-115.536	171.936	-177.66	79.9593	0
561.723	-177.322	-78.1171	-136.603	138.008	42.5725	161.772	-111.121	-44.2417	-128.368	66.9646	-46.6831	128.785	-167.161	38.6999	0
562.722	-158.643	-43.6067	-153.736	65.3765	-2.14132	-80.5594	-2.23643	178.156	-133.004	9.04945	-11.8539	164.682	170.969	82.6016	0
563.722	77.9067	80.3129	47.1216	158.299	8.96808	-24.1409	111.353	24.1099	-132.669	100.7	173.448	-90.514	-146.346	56.2929	0
564.721	98.2948	21.2396	-126.925	5.74608	-0.553776	-19.5505	62.1271	-78.7651	-138.042	93.3077	162.725	155.653	175.867	164.71	0
565.721	-123.609	-107.983	-20.0159	-92.9891	14.0737	-170.027	111.236	-111.054	127.748	-166.179	-48.0251	-156.386	178.771	-57.9618	0
566.72	-167.489	136.122	-120.65	70.9813	41.1593	-117.927	-174.1	-17.3863	-160.172	-42.9785	-0.449908	177.316	-157.989	65.8006	0
567.72	-149.439	70.0162	-166.137	-45.4464	14.6914	-93.5264	-76.2497	-100.712	-102.16	125.549	-106.05	158.981	-156.184	75.6317	0
568.719	-115.091	-133.323	131.482	-143.207	44.5229	-169.803	-6.96538	161.253	-124.591	-14.714	9.31472	119.119	154.242	19.0871	0
569.719	-159.488	11.6069	-171.653	-173.285	-85.1695	173.636	-62.6891	15.0231	149.472	131.335	-73.1034	132.22	-150.545	-92.8913	0
570.718	-126.939	-151.566	-93.2774	171.788	-14.5907	-170.109	-30.1567	123.673	-103.406	36.9888	87.4396	122.405	167.007	43.8483	0
571.718	-136.159	-97.7085	174.52	-9.98901	19.8643	-179.717	-67.4874	-55.618	-161.152	-17.0346	77.471	93.3991	-170.186	173.141	0
572.717	-116.234	11.2129	-117.03	94.2944	-30.756	117.676	152.454	103.845	-108.943	-113.11	20.1405	7.24421	-146.849	-66.3545	0
573.717	148.913	108.236	72.3309	96.227	-19.9404	101.563	38.3877	34.6473	110.433	-139.529	36.9447	-94.0689	-175.896	34.6104	0
574.716	33.1808	-90.8766	71.8449	169.601	28.4516	96.3268	72.903	31.1465	-128.041	95.2409	8.79607	-48.0713	-173.877	-136.924	0
575.716	170.143	-26.7747	-179.703	-111.945	0.543183	-75.5537	-62.4395	-5.94921	-154.768	-125.107	106.491	74.2623	-165.044	72.0472	0
576.715	154.298	58.1805	-167.596	-59.087	-31.6563	112.781	-177.854	65.0272	136.313	-94.8618	-29.3188	125.248	157.071	-127.987	0
577.715	-165.002	-34.7644	-149.641	-118.019	24.4148	-38.0604	140.589	48.2112	167.57	-111.314	-55.9658	93.2264	-158.644	8.2712	0
578.714	-95.3582	-90.5148	172.246	-138.219	47.5776	-112.773	-16.0674	71.6234	165.506	145.699	123.014	177.622	-172.607	65.3768	0
579.714	-161.897	-15.4315	-92.5665	176.737	6.20865	-36.6224	130.695	179.662	-149.536	-129.927	105.385	169.346	177.512	88.2078	0
580.713	-161.37	4.08753	-135.021	125.615	88.8445	41.1408	124.939	107.887	132.106	-134.163	-117.202	-145.883	-178.028	-110.452	0
581.713	-24.0854	-127.684	-164.124	-3.498	32.6471	110.505	-69.9218	175.683	-171.55	137.488	-139.778	-170.415	-178.048	-125.431	0
582.712	-153.724	40.0608	-147.717	32.1666	-14.6738	-177.065	-70.2408	61.3576	160.153	-104.23	-178.037	-64.8297	178.231	-172.629	0
583.712	147.739	71.4683	-163.084	62.322	-45.8477	131.631	92.8349	72.6968	141.381	-159.263	-157.96	164.311	166.882	140.387	0
584.711	154.89	-30.8505	172.922	61.2485	-30.8436	125.15	54.495	-34.7005	-168.207	79.6147	137.707	-156.641	143.816	-17.4069	0
585.711	94.8988	23.7187	-85.6205	164.77	33.8019	51.2932	38.7557	59.7937	169.273	-8.40967	-125.01	-62.6937	-178.379	-174.713	0
586.71	172.012	173.407	-158.223	14.1928	12.5151	169.729	37.4265	31.9794	-88.8586	75.2054	-83.5527	-62.4222	-154.689	-83.6398	0
587.71	-145.776	37.5482	-151.308	-136.672	63.0626	3.86525	69.2471	94.7313	124.583	81.0203	165.804	134.426	-137.414	-151.189	0
588.709	-118.579	-27.9577	127.678	-137.717	48.9587	-113.204	130.988	-66.0219	137.439	11.921	-150.988	-127.642	-153.232	95.8428	0
589.709	-167.899	14.159	-18.7246	5.75638	19.0013	171.517	165.784	-105.232	-176.095	5.73004	139.779	-136.302	-170.749	169.187	0
590.708	-118.86	162.684	170.832	-156.203	37.8606	133.861	144.732	127.609	148.607	178.068	169.846	129.968	171.247	72.3789	0
591.708	-178.194	25.3739	-138.143	137.697	13.9639	-142.917	65.9102	140.666	95.8201	-42.3296	14.7528	-174.801	-150.803	-59.0989	0
592.707	-54.6238	-126.88	154.019	76.4814	78.9777	94.122	-26.2543	-137.191	170.58	8.61159	74.1247	-57.4285	171.982	133.207	0
593.707	-169.924	50.9522	-175.927	94.9199	68.3098	142.572	-116.63	-16.6831	92.8114	-85.4322	-160.867	132.63	169.909	-3.80357	0
594.706	-116.023	-49.2924	-177.926	-44.111	-20.2384	-18.0934	75.8256	-88.4081	69.774	-131.115	178.465	-149.49	-147.34	-30.5234	0
595.706	173.52	103	-122.148	-61.8421	-13.1787	21.5124	-92.9647	122.551	-105.289	-168.475	-0.863131	147.633	-164.311	48.6645	0
596.705	136.735	149.585	156.868	-129.557	-16.7667	27.4864	16.3498	156.581	-151.429	111.675	146.865	104.553	162.885	-8.46799	0
597.705	-118.641	170.902	137.862	-89.0441	-33.5388	-159.522	-71.6263	-25.9364	-151.105	-130.489	177.997	168.572	-168.793	-8.78572	0
598.704	-176.572	70.7892	139.14	-69.4203	74.6385	-4.2478	-119.711	91.6011	-50.2037	-63.2067	29.0459	-145.602	-160.625	-62.1617	0
599.704	-95.4048	29.2567	-107.762	27.0048	-43.7715	97.7814	130.611	43.7329	33.1795	-2.24946	6.8109	47.4353	-131.162	-29.9533	0
600.703	-142.205	-12.373	-73.0329	32.919	63.3949	176.367	-137.094	-4.65826	-20.28	160.398	171.852	175.106	-177.112	-111.816	0
601.703	-161.969	-65.7887	-81.017	8.31347	20.7797	-66.2535	130.546	83.5373	169.832	146.591	-178.735	132.407	-161.008	-157.971	0
602.702	69.2142	159.879	138.741	-0.306494	-64.5208	122.742	83.0382	104.101	-97.7458	48.5202	115.441	-55.5367	177.973	-52.0973	0
603.702	138.951	14.4976	-69.9081	-149.28	-48.3334	-172.669	-79.6084	62.4107	-175.52	172.766	-8.78792	-60.2978	168.604	169.098	0
604.701	-148.745	88.7071	-167.523	-10.9492	77.8593	-1.99203	92.2024	-161.634	121.017	101.969	84.9019	107.513	-164.457	121.155	0
605.701	157.736	49.6677	-138.335	4.30081	-6.5862	-101.1	-35.1011	-13.4848	-154.498	109.885	39.8754	169.833	-166.533	-44.0594	0
606.7	-90.8276	-51.29	-133.413	116.876	-12.0139	144.234	-143.453	96.5639	-142.363	-68.9519	129.442	35.4703	-169.486	-5.53384	0
607.7	31.6032	-58.8727	127.478	14.9638	6.40061	173.383	-140.891	85.1756	77.1209	146.217	-73.7664	-68.2237	-128.723	-83.3449	0
608.699	-162.387	119.995	42.7832	-21.0128	12.9324	-22.247	-27.4575	-14.0491	-71.9421	-158.979	-18.2344	-105.84	-144.017	113.631	0
609.699	176.473	99.0478	-154.84	44.4532	-26.9208	-160.464	-30.0045	156.864	-171.273	161.285	141.507	-17.9258	141.08	-33.8614	0
610.698	151.001	162.409	149.702	24.2026	47.5471	-178.769	-9.06172	-92.2142	-137.972	-174.131	-179.783	-169.059	-144.739	114.247	0
611.698	117.227	-121.469	-109.202	-69.6655	81.2124	165.76	99.1812	-8.87947	161.583	-55.7718	163.299	-138.09	-156.547	-127.353	0
612.697	-69.8051	139.832	-149.701	-6.13388	-80.8614	162.136	-29.9661	125.727	-67.6136	-49.3389	71.9532	152.893	-163.062	57.7829	0
613.697	124.907	41.8927	-144.479	-38.2317	-158.218	109.427	-99.3189	159.631	-87.0213	-85.6974	158.005	170.698	-162.439	54.927	0
614.696	-28.9821	-68.242	-128.046	102.613	0.884159	-79.8945	118.1	172.758	166.177	-144.707	102.687	-172.373	-169.49	-79.6812	0
615.696	159.445	-33.1962	-16.1617	-51.4553	-12.451	-126.364	-1.67219	-143.065	-167.01	-129.229	-10.3599	-141.213	-173.706	-129.675	0
616.695	130.242	94.7432	93.1418	55.7407	11.4781	-169.932	-176.379	138.651	-152.946	-18.1352	-77.5119	-114.749	-138.783	-15.7957	0
617.695	-139.544	-120.959	51.6443	159.651	21.078	158.609	83.0071	24.6829	-119.465	25.8604	-13.2273	178.042	179.255	-7.83567	0
618.694	15.1505	-146.806	-109.687	-28.8351	-52.2392	38.508	-122.608	115.72	-112.958	21.8349	-94.7962	-144.821	-151.192	104.507	0
619.694	136.305	-28.7645	-98.2247	-104.457	53.3895	-161.905	148.193	-100.23	174.742	-178.39	109.545	-96.4499	-157.373	26.5839	0
620.693	-135.608	-173.03	-134.976	167.109	122.22	-34.952	-34.761	54.9391	-107.713	-124.806	177.51	37.7683	-147.844	-61.3732	0
621.693	160.183	128.603	171.406	32.2987	66.2218	95.9295	-126.031	18.8318	-138.913	171.372	-28.9722	169.692	-171.946	62.5761	0
622.692	-129.167	-61.676	-131.585	-166.157	48.5222	88.7253	122.658	141.564	-84.0572	-22.4246	93.5429	75.8726	155.415	-172.676	0
623.692	-94.1213	14.352	-150.615	88.9912	50.8908	176.393	-79.7973	88.3993	-133.362	-169.986	-175.804	-87.0062	-171.907	-72.2102	0
624.691	-112.427	55.8302	105.488	12.1588	-13.7385	-151.636	-69.0923	-153.293	169.077	-49.2148	98.8235	147.573	-166.174	-5.0558	0
625.691	-105.178	-7.10344	-79.397	-155.013	33.2765	-38.5881	122.455	70.3098	-80.3197	88.4419	51.0033	112.47	166.478	-154.482	0
626.69	-85.7222	-80.592	142.323	58.919	30.583	-124.101	-101.446	177.565	-111.059	0.159039	88.9454	70.2509	-138.872	-52.5696	0
627.69	3.60053	-14.7346	148.687	-22.1939	49.7906	143.101	-5.34995	133.969	163.173	15.8232	-53.8164	152.243	-148.092	23.0826	0
628.689	-132.09	83.725	80.8803	135.393	77.4109	-77.1917	-3.6429	0.0487067	-172.904	-114.154	-15.9245	-112.811	-157.273	-27.0159	0
629.689	-122.281	-23.3686	-177.16	5.39345	-45.6249	-73.8231	-97.089	112.336	150.928	-36.007	29.5117	-111.6	-160.692	25.9506	0
630.688	-142.144	25.6386	-135.084	-22.8592	115.749	-27.3955	133.515	171.716	-103.383	-136.778	175.498	120.431	-96.203	-140.098	0
631.688	-163.357	56.0292	-87.0774	111.861	7.04702	-48.6431	141.245	-60.8141	104.452	-89.0429	-146.217	79.5876	161.467	-110.342	0
632.687	-142.762	44.7415	1.22563	59.3599	-134.164	-32.5949	109.111	-176.811	-117.056	132.399	-90.4442	-117.982	159.072	127.411	0
633.687	-146.577	175.628	175.5	-22.964	31.3877	45.5866	18.0769	59.0344	-147.865	59.9532	104.62	-135.121	-172.355	-137.574	0
634.686	-56.2626	27.6721	45.0489	31.5212	97.9546	146.899	154.764	-57.5715	-120.703	133.306	-42.04	-127.001	-139.708	110.539	0
635.686	-141.271	60.4055	-160.728	104.366	38.4721	-142.619	111.621	-76.7502	134.122	112.46	-108.58	161.119	-149.079	-113.482	0
636.685	-143.167	-80.0438	163.445	67.9717	0.847802	63.9312	-129.477	8.83374	-134.649	-165.758	-170.242	124.679	-145.3	171.312	0
637.685	123.033	50.086	-33.8464	-42.1492	16.7933	-69.6338	-10.7973	112.105	-76.4747	-163.607	-9.31706	-147.947	-139.864	-81.5956	0
638.684	-154.864	9.61189	-117.137	-24.9865	32.081	32.4343	-152.489	110.538	-61.7313	-34.6234	8.30904	103.979	-160.701	162.806	0
639.684	-169.165	-2.63765	-116.936	-64.9266	-14.9114	-21.555	36.3799	78.4753	-168.905	-165.102	-122.221	-127.6	159.039	-141.279	0
640.683	-131.15	-26.8927	-118.815	54.3012	-51.7165	127.99	111.184	43.5118	-110.336	28.7553	-150.261	28.0718	-173.245	-140.629	0
641.683	165.878	133.244	-129.304	13.966	-74.9837	-132.705	115.896	134.882	169.307	-142.72	-99.2265	-133.649	-105.557	-1.72029	0
642.683	-174.978	-79.5797	-171.61	117.195	86.6484	134.604	178.051	143.654	86.8758	-52.5672	-112.546	-35.1181	-120.734	-21.6466	0
643.682	126.561	43.2027	119.061	-75.2415	15.6986	39.6844	29.5375	-165.51	-137.608	-98.1398	34.8081	-7.04473	-129.228	-53.7824	0
644.682	-153.577	150.421	70.7692	51.6349	-178.922	-139.69	-6.82395	37.7913	-120.447	155.362	11.2685	-4.1493	166.313	-121.797	0
645.681	-170.586	16.6956	-156.512	-82.9583	-120.428	165.599	135.641	1.8433	120.638	-150.006	116.645	-92.1776	-123.529	1.09715	0
646.681	121.408	3.5467	147.782	74.999	77.6947	157.805	168.208	66.0545	-135.321	94.9304	-18.8145	-115.804	-131.178	-157.001	0
647.68	95.8935	95.8209	68.8718	-66.3897	-19.3823	171.843	157.304	-99.2433	-164.895	-49.6129	-122.491	166.228	-164.563	105.56	0
648.68	124.299	-117.593	-166.239	115.21	34.313	23.4185	112.971	-32.1598	166.179	160.967	115.413	6.959	-146.607	30.0776	0
649.679	-31.3778	-78.9535	-173.989	95.2979	30.9677	7.31798	-172.265	134.118	128.166	135.78	-47.1361	-84.4396	-132.279	-127.803	0
650.679	-146.34	-12.7882	73.1028	-36.0191	39.3023	65.3384	144.663	-156.374	-36.5275	129.816	164.293	-61.0275	-143.986	148.494	0
651.678	-136.229	122.536	-170.085	13.2217	6.3372	-18.8103	-59.0687	160.02	-161.801	-158.094	-37.3567	176.113	-142.774	-143.444	0
652.678	-138.213	43.6138	146.773	-33.6459	75.772	-178.124	-134.763	-161.77	-44.1524	24.6366	92.1309	-20.1827	-164.175	111.446	0
653.677	-148.263	146.021	-63.7644	102.352	65.5662	117.024	-115.517	-10.7377	137.013	152.061	-55.5911	-139.665	-141.87	-93.4063	0
654.677	18.8752	38.1407	-45.012	137.229	113.819	-48.3141	-93.9985	145.691	-172.683	47.5688	-123.734	-110.178	-144.627	101.747	0
655.676	-83.0056	-5.15429	-119.082	27.7755	29.6339	152.192	-65.7931	23.7598	-89.274	-96.397	-145.085	-45.5505	-149.099	149.193	0
656.676	161.476	172.232	-171.78	-148.871	37.3293	-145.236	-77.7608	-92.1592	137.777	174.678	-22.1515	84.8578	-168.269	74.8177	0
657.675	-170.227	-136.114	-98.0841	25.2193	33.7334	120.948	-29.1291	-153.297	-161.715	143.036	-179.257	-160.51	174.903	-19.29	0
658.675	-142.719	165.353	-147.442	-116.275	-14.3144	-143.397	137.674	67.9719	172.6	-24.5914	142.61	-175.926	-171.363	113.603	0
659.674	-158.416	89.273	-143.022	18.3823	-18.8022	49.2816	-77.9065	-27.4414	92.7051	-106.16	71.2462	3.87267	173.168	-77.4798	0
660.674	146.971	47.6373	-24.5005	177.232	41.9504	-155.942	-38.3339	-176.191	173.833	-165.817	15.7989	159.479	-127.434	120.438	0
661.673	-95.0938	-15.4127	-101.58	179.469	-11.4247	120.938	149.668	117.867	-149.368	-67.1494	-151.975	139.983	165.844	-122.451	0
662.673	-6.12801	-170.25	-169.085	-35.1199	11.8198	44.4511	23.1315	-134.87	-57.0622	35.4407	-24.1942	-63.5081	-154.221	-17.8626	0
663.672	-102.956	-68.3191	-100.863	-104.748	155.974	150.375	4.51604	175.103	97.7074	-152.101	-86.8156	61.0335	-115.304	-93.8667	0
664.672	127.56	49.2328	172.894	95.9051	32.9879	-114.042	-11.3724	-59.864	-126.307	12.1771	27.9537	16.4531	-132.817	-45.2614	0
665.671	-177.078	-98.9614	-137.027	-33.5302	109.711	171.183	-96.9501	110.973	43.6096	38.5039	116.698	-171.955	-158.519	-18.9595	0
666.671	-126.788	7.2876	-115.271	-79.9339	-49.8412	162.866	-123.809	-77.9632	178.077	125.72	109.487	-168.446	-133.398	-146.832	0
667.67	-55.585	32.9634	177.855	12.2129	88.6882	-90.654	65.5723	-84.5653	150.102	-64.156	176.531	-128.346	-175.149	-63.3354	0
668.67	-47.3637	5.09868	169.55	114.736	68.8541	-88.6591	-98.2445	156.757	-46.5624	-67.5343	145.071	-82.3986	-139.15	-106.602	0
669.669	-95.6638	174.085	-159.45	98.5969	54.1697	116.311	130.887	179.601	-149.725	83.4321	138.87	64.8039	150.235	-125.139	0
670.669	-129.026	-87.6095	-154.481	-136.912	-142.614	-144.702	21.7557	-112.963	-155.633	61.6555	-149.014	139.215	-141.666	-41.2437	0
671.668	-124.335	-103.549	-99.7594	-176.664	24.9653	-104.745	58.0097	73.1274	-102.921	105.348	26.44	-112.161	-177.388	-139.577	0
672.668	160.806	136.1	48.1482	-126.408	14.2881	160.346	-1.61942	179.606	-68.1236	-157.337	-4.9467	159.21	-159.434	178.34	0
673.667	-117.8	34.5823	-39.5347	-167.812	-22.9663	30.6304	134.264	7.23401	-43.9449	140.099	-114.368	-46.8756	150.976	-42.5271	0
674.667	142.433	21.2307	-114.012	-84.6799	-116.403	-1.56524	29.0572	-24.9378	-138.069	-16.5514	-2.07561	-167.269	148.554	-10.6476	0
675.666	128.691	47.2656	112.823	35.0472	-33.8103	-135.37	-74.8799	20.2091	-116.921	-125.053	12.0434	-132.755	122.608	-114.564	0
676.666	-104.888	-30.7654	-173.932	-146.89	42.9778	92.9788	-100.905	-151.84	-179.646	177.604	11.7994	172.66	-139.217	177.961	0
677.665	-16.1377	-40.8508	-152.338	37.5922	46.9687	-34.8202	-62.4453	-160.661	-121.076	159.582	52.9137	-97.239	-143.528	37.1998	0
678.665	129.005	61.9507	172.585	131.917	51.0458	-129.235	72.3622	-10.8336	41.9821	-122.95	-20.6525	101.039	-126.935	160.689	0
679.664	-15.5113	38.785	40.7183	117.192	-32.4403	126.816	-65.8595	97.5607	-126.657	132.897	-14.7095	-96.447	-135.122	-114.686	0
680.664	-156.149	42.6827	160.912	86.2825	40.6616	-76.4901	-8.56	61.307	-150.122	121.365	51.0365	-133.451	-167.532	-142.783	0
681.663	-133.578	86.8644	66.7061	38.9016	-137.806	135.095	9.86622	158.763	35.25	-109.452	-102.921	-84.567	-138.389	-16.7765	0
682.663	155.856	-13.0122	108.218	74.4109	107.074	105.522	22.6197	77.5183	169.493	-94.2085	-0.414031	56.1638	-134.415	-165.101	0
683.662	-179.197	38.1674	170.24	112.732	-2.20741	-39.9746	-143.429	126.834	-170	110.53	-43.7822	-127.562	-133.412	112.496	0
684.662	-177.307	46.7755	120.992	-111.668	157.088	-124.892	116.36	-75.0927	-172.977	-125.013	27.7484	119.762	-135.312	72.5041	0
685.661	173.287	17.3377	-154.685	-99.1041	-31.336	-135.381	-68.7174	-143.115	29.8302	-28.5286	-95.8125	161.591	-152.844	-9.36401	0
686.661	-137.541	55.063	117.569	50.6626	91.4436	-133.367	-97.2617	147.965	109.377	37.4446	98.886	-4.4326	-154.22	48.9461	0
687.66	89.5557	1.44613	-25.8165	-168.016	59.0788	-81.1395	-74.7433	75.969	-31.957	-126.065	-104.461	-148.886	-167.234	-143.157	0
688.66	-171.401	-17.7494	-90.3987	37.8439	26.6167	-35.6009	83.5122	92.1317	-99.54	63.1026	-4.27106	-131.079	-154.53	-17.1928	0
689.659	-153.188	144.02	-89.8198	93.5695	-50.4067	-172.847	-133.249	157.351	-157.164	-139.546	128.129	-102.998	136.16	-2.90831	0
690.659	-73.1629	119.487	-150.208	-36.3662	93.6792	96.5169	-160.242	-0.360715	-73.7066	23.4966	26.7431	89.0341	-160.079	80.5637	0
691.658	-90.2805	-84.4125	114.534	132.598	23.8395	20.9132	-41.3798	-56.3559	-110.318	-163.295	110.313	-165.392	-113.912	-7.9114	0
692.658	171.182	54.3145	-151.084	-2.02695	55.2826	111.081	153.379	82.7506	-176.217	-134.715	-7.53823	-61.6926	-109.255	-179.977	0
693.657	76.5979	-21.7855	156.845	85.2587	-107.397	-134.198	-104.492	-0.703482	-12.3352	-80.0319	-59.2614	111.503	-155.05	131.763	0
694.657	133.655	137.521	-156.22	-57.659	61.8791	-9.25623	49.9304	102.171	-167.379	24.1226	70.9787	139.956	179.343	57.0201	0
695.656	-173.765	-171.46	-23.3892	-132.402	99.632	-12.9803	166.226	-111.834	-93.9902	63.3098	-160.853	-133.275	173.115	-102.699	0
696.656	-107.813	-47.604	-173.904	159.553	19.7989	65.6494	-70.1066	19.6666	-116.553	57.6479	50.5001	-61.718	-148.164	-173.745	0
697.655	-165.14	-143.728	81.106	-81.9382	29.0833	-95.5817	-53.1901	105.377	-122.463	10.3307	-159.665	168.628	-168.303	0.715033	0
698.655	119.79	-179.856	132.769	156.997	112.962	-61.2291	-167.998	-145.666	163.574	-63.7653	175.334	130.246	-152.739	-171.847	0
699.654	144.765	-40.9045	99.8819	-96.549	-91.6969	50.2915	174.302	-136.899	-75.3784	-10.9203	-50.8439	-137.945	-99.1309	-30.2135	0
700.654	-122.517	56.1654	-3.24585	98.722	6.64655	62.5823	-94.1308	-90.9472	-88.8838	12.6885	-124.774	97.6399	132.491	150.608	0
701.653	-150.994	-130.079	-105.608	63.7123	40.1434	-118.694	-149.881	171.049	85.2243	35.2024	48.3788	-138.019	-140.935	-128.019	0
702.653	-94.5242	-83.6836	-129.225	-159.551	43.979	-168.947	-3.21057	-53.5296	-99.5934	131.631	40.3297	-74.9994	162.583	118.674	0
703.652	48.253	35.5193	79.1224	47.2196	26.5216	0.956654	-6.67128	13.0394	75.3192	121.88	-58.4374	-123.976	-148.571	153.284	0
704.652	-122.694	-60.213	-112.148	-132.871	29.7258	84.6934	167.616	-67.009	-149.403	129.136	3.72501	162.399	-134.112	68.4606	0
705.651	-109.667	63.1855	-172.153	-2.46231	40.8535	-71.1184	114.213	83.9098	137.012	78.0864	-111.444	64.65	-88.0189	85.2773	0
706.651	123.267	-149.032	-152.876	54.3699	49.6266	-49.496	-145.977	28.9075	-119.659	116.127	36.781	-45.0279	-142.297	34.2091	0
707.65	-70.4891	46.1577	-170.549	-34.6829	15.521	-52.1769	150.154	145.937	150.468	78.6288	17.6169	-3.51597	166.505	10.1646	0
708.65	94.6393	21.2839	-113.305	88.1586	72.9075	-136.502	72.8859	-22.1438	-14.9339	125.785	97.459	144.622	-140.153	-102.368	0
709.649	-153.268	0.382501	-163.333	96.0321	90.0224	161.741	104.206	53.8429	-92.3096	135.936	60.9898	-109.158	-163.136	40.1281	0
710.649	-20.8151	-102.044	-86.1572	10.2157	-72.4896	-83.1964	-75.907	151.467	-84.1868	-9.16578	64.8499	-17.5523	-126.962	113.26	0
711.648	75.5336	-81.1575	137.29	68.9472	75.6385	176.185	-39.891	104.858	174.673	70.4012	-158.093	-157.788	-101.683	107.659	0
712.648	-69.6983	69.4361	104.202	49.8165	38.6909	-127.683	-159.648	110.333	-126.748	62.7461	-41.3396	-118.613	-55.4933	-8.81873	0
713.647	73.4581	71.2345	-82.3608	-135.834	-34.9625	-162.9	-13.276	163.751	-167.548	-88.4738	30.1545	141.463	-158.082	-99.1907	0
714.647	-138.248	7.49015	12.9185	148.088	13.0914	-98.1479	87.8505	-87.5327	-121.456	-8.94117	-104.66	-136.976	-124.734	-146.026	0
715.646	119.091	45.254	-35.2914	147.434	-0.653721	-110.855	-125.695	103.882	-125.041	79.0285	-148.994	111.403	-159.831	-103.202	0
716.646	20.8233	45.7403	-168.4	-148.905	-101.477	-66.1	71.7649	154.046	161.391	118.163	-51.07	130.811	-139.397	112.34	0
717.645	-135.369	64.0166	-108.222	-178.579	-147.083	-5.07283	-149.81	-151.332	142.706	140.975	52.2557	22.2977	-163.389	-86.5254	0
718.645	-124.105	-1.38901	-149.058	-82.8533	-0.398322	-178.067	9.60185	72.9606	-102.05	64.3345	-135.073	-171.968	-107.302	-130.179	0
719.644	-114.392	-0.601697	116.221	138.167	-15.0228	-153.33	9.40009	-83.6533	-94.4958	-161.933	-116.91	24.2893	148.452	29.5737	0
720.644	-90.3306	112.319	-98.5122	-150.2	30.5258	147.075	-177.157	-41.2228	-32.794	36.1019	-97.2607	107.243	160.515	148.514	0
721.644	95.9713	39.4262	-54.0558	-170.554	8.99266	-136.496	-170.003	-44.2176	-176.36	-26.4139	-91.9602	33.069	40.8843	-0.938114	0
722.643	-83.7088	-100.704	-141.052	149.751	59.554	155.617	43.7518	145.503	-178.927	-123.5	-2.15304	-8.9762	-97.673	57.3571	0
723.643	-105.12	-148.666	175.656	-23.1497	23.146	-83.5573	-51.8571	45.2913	101.062	-129.499	-129.863	-153.013	-106.42	-27.0887	0
724.642	170.77	86.8515	-112.822	-56.5447	43.0886	20.0883	-52.1018	139.641	-94.158	-149.119	-115.534	56.0176	-166.422	28.3916	0
725.642	142.776	148.68	166.902	97.9248	82.3027	165.185	-179.638	-62.2556	157.01	-177.548	119.527	-133.061	-161.257	-84.8892	0
726.641	26.7096	27.7828	73.5728	-40.2069	-3.80426	52.787	20.1877	-11.3	146.629	-85.0086	7.18996	-166.871	-124.859	23.959	0
727.641	144.888	-12.581	11.8129	60.2285	51.8946	9.34928	-117.121	33.4391	-157.971	-147.429	-62.9192	-13.5682	-122.85	4.67534	0
728.64	18.7957	-21.4965	-63.3559	50.1302	96.4121	139.861	-96.4171	-88.7951	-169.676	27.4925	73.4738	173.301	-101.683	127.009	0
729.64	138.312	105.387	-26.2358	133.949	79.8622	120.977	-48.6987	171.218	-98.7427	-105.216	72.9552	156.802	-159.894	-115.693	0
730.639	-149.177	4.60488	-102.674	87.4037	18.1672	77.6391	-81.1334	79.4115	18.4017	150.808	-102.353	179.5	-143.6	50.8538	0
731.639	37.7915	97.6157	-53.2502	-48.5162	73.0071	129.696	-98.8301	141.106	120.939	-16.9692	105.906	-163.956	-92.5854	-74.0352	0
732.638	14.0185	-44.4897	67.7855	-98.4976	26.831	110.395	127.395	103.395	143.318	-172	11.0979	-99.6342	145.95	-136.905	0
733.638	162.894	75.3225	-66.8507	-76.455	67.6525	-151.102	-90.2222	45.2756	-109.586	-13.4305	23.4279	128.921	-169.96	-176.126	0
734.637	-81.7275	1.45924	3.80272	9.51351	29.8751	97.7597	163.757	117.805	17.1259	36.8145	35.7306	73.6029	-111.121	78.4808	0
735.637	-160.082	157.081	164.714	177.203	68.2403	130.278	-153.602	61.2534	-177.534	-166.801	-156.016	-146.526	-133.887	70.0358	0
736.636	157.314	-160.658	129.384	-161.011	93.9522	130.049	124.313	147.6	-139.516	-101.564	-41.6831	-160.143	158.894	88.648	0
737.636	133.538	143.154	175.401	162.799	61.8865	-23.0803	-114.05	139.175	157.261	140.729	-94.469	-164.308	-148.503	126.388	0
738.635	161.509	37.7003	-107.288	170.267	76.5063	140.739	-179.941	89.9237	-114.576	-147.085	-105.706	126.976	-133.248	-151.641	0
739.635	-140.952	-141.517	129.715	98.406	-32.8327	13.6751	-127.28	131.925	176.32	175.975	-125.28	-45.4259	-158.223	-88.5858	0
740.634	12.9792	57.2088	157.65	-12.7679	-160.01	-94.7322	128.332	-130.063	-121.578	54.2594	-164.383	86.0992	-150.484	-97.007	0
741.634	-2.56667	171.456	164.969	146.904	-73.7167	-147.493	98.5351	68.3752	-175.907	-154.714	-92.7261	-151.222	-148.873	108.682	0
742.633	-80.084	143.349	-143.452	-34.6688	65.1491	-84.2787	87.0152	-72.6367	-141.509	102.514	150.449	175.649	-124.94	45.0955	0
743.633	166.534	94.7738	174.579	60.1613	-3.77191	-96.3157	71.1231	-41.7327	60.5511	16.3786	-0.793881	-107.951	-161.49	174.811	0
744.632	-104.366	98.433	91.4992	105.384	53.1572	12.3067	156.973	-57.8897	-112.276	102.911	-80.1355	-62.2341	4.83763	71.4829	0
745.632	-106.342	-63.7232	11.4658	-31.1449	-97.3274	-111.811	-38.1341	-50.3037	161.744	-157.679	126.464	-17.2205	-118.635	84.8953	0
746.631	-11.8798	12.5315	-157.124	-23.9413	114.798	176.079	111.507	35.7308	-90.9438	51.824	-53.4243	-144.842	-139.956	-40.7955	0
747.631	-163.679	-93.5758	-106.064	-111.415	94.7986	64.5217	112.183	46.5576	106.182	-73.8413	-123.212	-33.2735	-149.965	-107.596	0
748.63	167.257	-20.2311	-145.958	77.5	-167.476	146.154	36.4131	120.616	159.008	43.783	77.1825	100.849	-101.743	-134.325	0
749.63	-90.1761	44.7672	129.207	-131.679	19.457	-14.8629	174.81	109.322	-118.229	71.6993	1.8845	170.332	-142.169	-11.1713	0
750.629	171.98	129.955	-148.808	118.423	67.7523	78.7074	-45.4165	67.5361	-171.642	-157.319	142.587	-46.0796	-116.978	-9.36461	0
751.629	-134.236	168.162	-119.844	-177.356	79.1745	-132.131	53.3189	152.244	34.9952	5.55601	99.1163	-123.897	-127.167	98.1933	0
752.628	-111.948	137.97	-63.7595	-133.382	169.582	160.898	-72.868	24.4256	5.61256	-50.1787	176.108	76.0028	-144.824	-48.1383	0
753.628	-45.8222	-25.6632	-74.3359	-121.557	24.8186	31.1696	176.671	111.397	-150.348	144.1	-132.333	-169.859	-160.95	123.502	0
754.627	-60.1257	65.7309	-133.196	141.551	75.3884	175.698	-139.881	137.731	-11.3368	-151.613	101.085	110.829	-101.911	115.703	0
755.627	-175.678	-157.519	100.68	-146.53	135.889	-124.289	-5.78543	119.669	-141.124	-13.0803	173.003	-147.855	-158.293	-171.143	0
756.626	-126.68	-68.3085	-96.5612	-169.856	132.336	117.476	69.1798	-175.765	-138.258	-107.543	141.262	133.43	-173.638	-24.5841	0
757.626	-154.085	-49.3746	169.831	138.738	24.3974	-119.565	105.03	-42.1976	-120.106	41.3845	22.6346	125.014	163.265	38.7983	0
758.625	-125.557	120.747	-10.8065	160.105	53.4842	-101.355	-8.71741	3.82222	-153.965	-145.225	-148.347	133.274	-156.284	-61.8512	0
759.625	-97.9162	73.7536	-87.9193	3.04624	-73.5675	-133.585	80.022	54.4731	-154.352	130.623	-136.75	179.815	-114.027	-110.294	0
760.624	-138.195	-39.6104	177.302	98.8003	105.255	60.0117	-29.9239	-105.548	-62.8434	-179.8	72.2631	-134.907	-154.27	81.5266	0
761.624	-71.0901	139.832	-92.1993	118.126	84.2771	41.7977	20.5413	-1.35486	-141.886	113.413	-161.416	61.133	-146.562	-101.548	0
762.623	109.158	-79.6209	36.3361	-40.7991	9.52917	-107.593	159.692	-132.962	-101.85	-130.262	174.821	99.6511	-145.321	174.089	0
763.623	-91.8213	17.5299	61.3444	-33.5271	-59.46	154.592	-132.225	-0.503561	-9.13273	-66.0905	-53.0552	-63.015	-157.941	-96.6245	0
764.622	-64.9381	-149.8	27.3717	94.792	-163.6	146.496	-105.984	-150.276	160.758	-66.4379	-110.121	134.977	-119.69	-172.808	0
765.622	179.612	-24.6845	137.224	94.0903	36.3483	-178.122	76.0038	141.31	18.9392	-99.2485	120.128	14.6554	-104.982	-101.478	0
766.621	68.3358	-39.4291	-147.726	-94.2489	-11.8539	112.891	89.0298	-11.3076	159.247	-138.893	80.9083	-83.3984	164.325	8.82133	0
767.621	-50.4811	-40.0242	115.051	-89.5563	52.6285	22.0949	36.583	-153.47	23.028	-64.2058	142.855	104.052	-146.631	147.79	0
768.62	-34.4418	130.961	-147.651	50.0413	129.914	-164.829	-131.019	-150.138	-116.897	35.5147	9.00648	131.445	-139.73	-91.4293	0
769.62	-77.2901	72.1235	21.9324	-48.3031	-78.5065	11.0915	108.38	-1.66256	165.021	8.73603	-177.181	-70.858	145.641	-34.0401	0
770.619	151.114	-109.625	-135.593	-44.8504	-133.165	-17.7328	85.664	144.419	37.1125	50.5718	139.585	133.639	-121.833	137.153	0
771.619	148.992	-77.6397	6.13657	-46.3893	-157.062	-145.26	71.6915	59.3803	-137.989	-25.857	-58.8797	59.6071	-152.108	-78.2204	0
772.618	164.125	-176.998	30.1785	113.058	58.1517	-169.476	-69.6306	125.662	-107.265	-116.265	7.7423	-106.171	-118.3	71.4423	0
773.618	-97.3241	154.522	-151.978	176.193	76.4426	67.9344	10.6641	-165.711	118.192	120.27	103.587	49.3948	-159.807	-174.661	0
774.617	-100.222	-89.5317	-63.3516	63.9182	-36.0073	-128.862	151.389	55.2747	-130.003	169.952	-107.723	-22.3098	-137.263	25.6962	0
775.617	-58.5995	-145.167	-153.381	-174.82	99.5672	-82.5284	-165.587	19.6377	-31.2401	142.191	-52.9987	82.4136	-98.9372	153.196	0
776.616	74.9394	-86.7485	131.93	99.0382	132.371	21.5395	144.199	115.508	164.723	-29.0451	63.8921	131.04	-155.595	-176.419	0
777.616	127.01	37.1636	-101.833	-114.573	26.2203	129.801	74.189	175.945	174.115	147.169	108.953	-49.7043	-70.0478	43.5847	0
778.615	-162.354	6.21425	-84.9325	-104.298	133.675	-24.1249	99.373	19.096	-179.481	149.332	-136.374	94.3648	-127.714	20.1704	0
779.615	-106.493	-31.7724	-153.131	92.9744	166.843	-49.9043	6.45575	101.136	-102.485	-178.647	109.547	48.044	-81.8834	67.8113	0
780.614	165.032	-157.49	-2.00244	74.9838	78.2142	71.6389	128.91	130.711	105.471	-135.324	80.6404	147.968	-104.816	-74.5801	0
781.614	143.876	-48.3179	-113.665	-128.202	27.4258	178.51	138.887	146.238	-146.656	-119.697	1.3275	150.457	-116.914	-133.695	0
782.613	115.856	29.5033	-65.7348	-45.6315	-20.8739	125.511	75.2715	-23.4739	-62.5328	-90.0585	51.4207	-105.363	-114.77	100.85	0
783.613	-10.2566	-129.811	-116.563	123.759	118.923	92.4963	63.1351	-60.9877	112.505	37.7072	-144.654	-128.91	-142.936	-12.9762	0
784.612	55.8115	35.3276	-71.448	-179.009	68.3937	-76.5766	-96.4176	84.5209	-114.717	98.5039	-140.936	155.378	-127.017	17.3231	0
785.612	-8.83971	49.9013	-16.1154	52.9718	76.4712	-167.433	172.004	169.998	-6.20235	46.0476	150.471	-127.311	172.618	-40.663	0
786.611	-93.4727	-106.34	-175.173	-142.555	-170.412	-3.37785	-33.3462	163.359	159.727	14.0837	-33.1183	-126.677	-134.202	-143.45	0
787.611	-109.286	33.495	-23.956	25.6701	109.817	134.826	156.788	18.4569	-70.2201	-114.309	30.3065	13.0553	-83.8681	-68.1639	0
788.61	-107.347	-77.1256	153.56	7.26937	-22.8166	-54.1491	-2.32366	125.054	-152.438	168.289	-40.4279	77.7075	-110.286	-70.055	0
789.61	-141.786	179.415	-115.324	48.0011	53.796	101.656	110.716	149.631	-39.8928	-155.243	-147.906	130.868	-107.811	44.4255	0
790.609	-47.844	151.512	-6.98484	-152.117	61.6344	133.048	145.1	32.9012	-52.5498	-15.9376	-41.5739	-167.459	7.74754	-41.3263	0
791.609	-32.9081	98.2772	-104.506	-34.3038	78.7782	126.996	130.865	-25.5729	-179.891	-8.98756	141.228	-149.641	-134.051	-159.91	0
792.608	143.841	-142.8	176.243	154.692	92.6307	49.334	-70.3469	-159.754	-42.4374	30.3673	-69.964	109.081	178.477	80.5127	0
793.608	-158.867	28.4385	159.517	-178.555	-29.1513	-63.4202	36.1893	97.9598	114.563	-113.18	96.0322	5.33554	-50.7594	-140.288	0
794.607	-67.377	-70.2419	-28.2099	118.887	83.2534	64.1363	49.9236	-144.644	133.385	-177.219	-143.98	152.041	-109.795	6.0729	0
795.607	-91.9662	65.5383	125.871	-69.6135	90.5477	-133.756	-39.2682	103.273	161.02	103.634	-66.4515	117.048	-117.12	-87.6758	0
796.606	134.693	-77.418	31.4309	-51.3292	-128.929	-93.9855	160.296	75.9492	158.229	-178.881	-66.6907	-152.19	73.3082	129.617	0
797.606	-50.0913	-78.4713	79.729	-79.8845	8.06521	-151.753	69.3223	-70.0652	138.956	33.0635	37.3785	-49.5504	-64.1301	167.169	0
798.605	142.881	-69.3757	-137.312	-51.0746	89.0181	78.8645	84.9704	155.974	-83.7912	129.476	68.0748	-135.853	-136.839	16.4768	0
799.605	-90.4877	34.9037	82.4801	58.9039	37.3986	-66.5312	-80.3906	83.0381	-45.6062	73.6211	6.05216	-93.4934	-116.11	119.792	0
800.605	-135.85	122.713	-158.914	-20.5284	82.5765	154.916	-28.4261	-146.258	-50.8672	170.778	117.691	-61.4283	-98.7219	12.9768	0
801.604	-73.642	26.7654	-34.9707	149.16	-9.2618	126.008	90.744	-175.437	-41.492	15.6688	-28.1027	111.956	-45.1628	-46.8477	0
802.604	126.29	-141.271	107.377	-124.689	-75.399	78.2335	-60.5907	-29.4594	55.5978	-61.1718	-44.4174	56.2465	-87.6048	65.0104	0
803.603	85.5015	92.996	-57.2237	179.121	168.904	10.3461	-92.3758	-162.364	-98.1211	-115.906	-172.192	80.3979	-48.8849	-141.065	0
804.603	-113.886	24.4923	-10.431	-158.028	-141.636	-119.192	-118.532	-115.172	-81.1147	-25.339	-10.0743	-102.111	-133.418	156.784	0
805.602	-151.539	34.6327	-123.766	106.945	-20.0037	-74.814	-57.0792	-118.614	-20.6115	147.647	159.932	160.182	-37.0196	-32.0081	0
806.602	114.314	-61.8977	147.116	53.9551	-14.8813	-78.1239	72.8365	88.058	-145.165	27.9834	5.24417	-50.374	-114.133	178.4	0
807.601	-36.7123	-109.619	-86.1988	-97.1877	171.654	6.56857	14.3578	-25.7919	-79.2939	-41.9851	-68.1548	-49.5548	-115.327	106.969	0
808.601	-1.97856	92.915	71.7283	-108.999	18.4418	31.6195	-97.6118	171.212	-105.569	-44.5047	64.8534	-42.4214	-99.2716	175.466	0
809.6	-115.468	-124.509	149.849	-14.6988	-42.0946	39.8467	-22.6864	-46.9671	-134.571	163.158	-138.879	-46.5076	-127.348	125.991	0
810.6	-87.5797	-103.862	-111.251	104.723	-95.411	151.874	108.806	39.8018	-3.91094	77.2649	-16.5389	-82.1042	-92.397	174.066	0
811.599	142.467	-137.486	76.8514	37.8581	76.268	-23.1184	69.5419	-3.96678	-108.47	-140.91	-121.573	130.185	-87.5757	-8.64756	0
812.599	-102.788	-135.826	142.44	41.0552	-29.148	-21.8508	-178.308	-119.879	-74.0119	-92.2361	128.171	98.5809	-165.28	158.196	0
813.598	-96.7023	1.45265	-126.032	-120.882	-83.7197	-72.0715	79.9268	116.064	169.653	-72.6352	-156.309	-63.1804	-132.056	-137.67	0
814.598	97.3432	-12.2336	107.355	102.834	-29.6817	-132.008	-89.9315	49.0763	-44.6763	48.5735	69.6159	89.0581	12.802	-5.11898	0
815.597	173.732	-174.224	-147.484	26.7828	3.973	-74.0242	-73.3059	119.389	176.445	-133.583	67.2945	95.6598	-178.221	-15.5758	0
816.597	49.1265	56.7717	-132.21	-30.9851	-43.3801	-152.664	-5.95319	142.519	168.658	-8.11663	67.1652	-42.6303	-113.783	-121.759	0
817.596	-33.6584	-20.5057	-25.4291	38.7519	74.752	-157.002	-120.752	135.576	51.1701	26.5864	85.8148	-172.844	97.3079	-174.369	0
818.596	131.698	-27.8272	-37.3349	32.2912	57.771	-9.15268	51.0861	-149.835	-29.3889	70.8609	123.853	-52.1448	-113.281	-130.742	0
819.595	-146.186	95.1917	-52.3359	62.1918	-8.88187	129.111	42.8983	-21.9024	108.817	-43.5067	42.0507	-118.597	153.99	44.2553	0
820.595	-142.814	18.6399	57.8428	-142.607	20.5549	-173.098	-16.3585	178.216	-8.29281	-109.37	-8.86416	-77.5868	-72.9903	136.786	0
821.594	-25.211	-15.7029	-79.2252	176.305	11.9001	12.4137	168.535	-90.1755	-72.7446	-34.9084	173.444	-112.349	-115.255	124.368	0
822.594	-104.963	52.4828	-95.1141	174.314	66.8887	53.3395	-66.4393	-28.9821	14.9344	51.6977	55.2367	-117.321	59.2371	33.5717	0
823.593	-128.697	61.5307	-87.8117	-87.7307	-12.8719	-148.495	17.3067	-108.841	-21.1218	-114.775	-12.9234	83.1373	177.669	-45.9697	0
824.593	150.687	28.3796	88.2841	7.82225	101.342	-146.514	-21.8256	-104.302	-39.5808	26.023	-53.4988	-57.9958	-47.7164	99.4996	0
825.592	150.182	166.449	-33.0901	-178.393	5.54841	-166.22	161.137	151.085	131.079	103.163	10.1328	-158.857	-134.984	-107.17	0
826.592	-171.468	178.737	-61.6505	42.1558	77.7987	67.987	137.063	-140.199	61.2466	3.04941	24.9108	109.601	-20.2962	-124.252	0
827.591	-78.7335	94.1209	-153.803	-24.0853	69.0042	14.59	78.6501	-96.1669	120.428	52.8114	-25.4097	-90.8427	-170.961	87.3195	0
828.591	-56.1604	-20.5988	-75.8456	-22.6268	50.5802	-173.592	-35.5083	107.57	2.72682	176.387	4.81485	64.2896	-47.1567	131.035	0
829.59	91.3819	50.632	21.69	30.2493	18.3598	-32.6784	160.854	54.719	-169.798	50.8598	57.9489	67.3859	85.9946	-133.524	0
830.59	-1.63114	3.0356	-17.916	56.4667	20.8941	53.25	-78.9549	154.253	6.40822	8.3847	14.1927	-31.1033	-11.666	-19.5982	0
831.589	111.32	179.758	-149.108	165.94	-156.761	-16.6251	-63.7758	147.445	-176.363	157.484	-172.557	145.631	-152.469	-60.2424	0
832.589	178.797	-161.959	142.672	-100.306	120.775	-130.348	-41.2233	163.839	-129.182	-174.438	-134.094	158.408	178.603	63.5184	0
833.588	-110.15	167.671	-97.3103	-161.919	57.237	-86.5292	113.486	162.604	157.714	-163.787	-124.216	-99.2236	130.572	-165.931	0
834.588	-53.7359	-94.8859	179.992	138.249	77.3414	150.292	74.4567	97.6555	-144.344	-154.998	145.832	162.598	-127.351	151.911	0
835.587	126.919	157.545	-17.1648	151.391	-173.463	-159.911	-84.6463	-164.343	161.563	-32.4887	26.7622	-107.531	-143.393	128.673	0
836.587	110.427	-126.367	-25.4895	82.9217	7.33527	-4.49774	-75.8047	49.4841	-126.817	-135.195	-98.621	-145.617	-103.272	58.0514	0
837.586	-94.3657	-161.602	-135.238	-58.3696	173.756	172.867	89.5312	167.207	174.804	165.963	53.3666	-147.901	-36.2543	-4.58245	0
838.586	-76.577	-105.823	-99.1779	-165.243	-59.6573	-83.4459	-127.299	-84.7172	-154.043	-160.262	-20.8117	117.198	-166.835	-157.462	0
839.585	-41.7239	159.822	26.508	-124.544	96.4235	-169.413	-109.468	41.5906	-171.973	-154.872	39.4228	-62.9407	4.67253	-24.9659	0
840.585	-18.6724	-121.611	146.189	-67.8008	-120.98	31.8634	-93.4032	18.9448	-151.02	-156.482	117.522	-37.657	-60.9798	104.147	0
841.584	-107.058	-122.334	160.258	-20.5	88.4635	-147.919	50.2113	169.034	-124.187	75.8792	131.777	-72.5908	-134.056	157.096	0
842.584	-171.29	85.6039	-47.0107	-103.515	58.869	-88.5017	-80.7006	149.975	-160.9	140.321	14.352	-5.01876	-148.968	-21.875	0
843.583	-125.75	126.072	-52.2015	-95.377	11.9801	-78.6104	-150.33	-176.152	170.769	142.573	-49.4221	-10.8835	164.086	-72.4855	0
844.583	-54.6298	-140.655	-123.389	-125.596	20.1985	-56.2519	75.1098	-146.938	175.312	97.1164	-139.253	159.795	-113.189	139.577	0
845.582	170.748	156.767	-159.063	-9.68969	7.54889	149.692	32.058	-89.3355	-154.61	-169.572	-144.974	84.2664	-147.862	141.965	0
846.582	-146.032	-47.6718	-170.368	77.2013	140.728	-87.3174	98.2338	-54.7181	-92.8733	116.398	148.2	-137.052	-151.226	-82.4697	0
847.581	-43.1897	105.708	176.236	-13.1552	-157.597	-71.3727	52.2092	64.5797	151.509	140.167	-19.3379	15.2357	-66.0195	132.039	0
848.581	172.772	-15.843	105.871	175.045	-135.33	-10.4763	141.053	146.829	141.427	31.33	130.62	-142.209	-156.669	-81.9866	0
849.58	163.786	-13.546	-125.494	65.2431	120.129	-169.383	32.1247	-131.423	54.1341	79.0839	-5.23388	158.389	-8.30172	-142.481	0
850.58	-54.7195	-91.6651	-111.553	154.718	33.5007	8.74554	-139.214	3.52993	-173.789	21.7812	136.404	34.5874	-116.681	61.6915	0
851.579	-82.451	100.935	-169.034	5.27517	59.4776	87.347	142.786	-84.9256	-78.0609	-24.3274	12.4673	140.202	29.8687	169.838	0
852.579	157.423	166.779	34.9272	100.239	-93.6913	163.494	-99.2683	84.4582	103.959	-144.959	54.6498	-98.8649	-28.5596	-163.15	0
853.578	-81.3625	146.52	163.325	-141.818	16.3455	158.128	34.3103	158.895	-145.979	-6.65167	-89.0595	115.42	-177.366	46.9148	0
854.578	-149.321	117.858	-119.723	0.192917	40.2883	30.0915	-36.0977	127.646	174.48	-83.006	-31.8845	-64.1745	-168.145	108.72	0
855.577	-129.652	-79.7721	177.631	61.5225	115.368	102.678	-36.5714	77.5318	-88.917	-38.0922	77.0776	-106.15	-94.0504	83.2676	0
856.577	-128.877	69.5768	145.796	-72.3302	119.29	-128.357	34.4829	-118.154	-93.5032	-164.973	-135.451	-59.8439	-23.2594	-161.158	0
857.576	132.443	20.8981	-169.28	6.36594	-79.1183	29.5094	84.2459	107.432	-59.4294	151.216	-10.7631	-129.276	136.893	113.819	0
858.576	-97.709	-105.672	-48.804	-176.515	87.0499	20.1615	13.4683	-144.659	-26.5644	-167.404	-63.813	-133.393	62.1729	15.7596	0
859.575	-15.3959	60.8235	-165.955	54.2863	84.364	-125.536	-126.611	115.294	-7.62371	114.612	-108.471	-78.2562	-107.287	92.6673	0
860.575	-173.989	-105.068	-170.737	18.5396	-89.019	19.1842	-20.8315	8.94726	-119.072	165.692	35.5874	31.0489	-118.618	50.8863	0
861.574	-123.644	-79.4805	-175.571	63.5234	124.717	112.561	-147.638	97.1898	-0.289136	116.805	179.595	140.179	178.838	88.7962	0
862.574	-70.9034	57.0269	-139.24	-77.28	18.1841	-69.1716	-174.968	40.4577	-100.045	23.1977	-94.9537	-174.207	-48.1606	-69.9796	0
863.573	-107.362	84.7308	-175.845	-149.38	105.429	163.22	-95.4554	53.8023	-131.591	-74.341	-141.137	32.4684	-131.371	8.77098	0
864.573	-128.452	-71.9904	165.893	-105.202	69.9914	-167.435	-115.861	49.1073	-38.4157	-58.6106	-38.7043	-11.8445	-144.704	172.835	0
865.572	-136.162	-175.684	-162.746	-72.8139	148.431	-68.6307	-23.6961	-99.7612	-162.682	-172.874	99.9081	141.765	-177.331	-16.4067	0
866.572	-169.94	30.4058	17.8818	94.8419	44.8445	-76.7642	140.584	-138.592	27.5166	69.9265	-138.252	-114.983	-77.2271	-53.4701	0
867.571	-68.4376	159.731	-46.8795	164.778	-78.7292	-17.5529	92.7188	-50.8432	-101.486	-168.718	52.9108	3.80077	-97.6171	147.21	0
868.571	-138.167	168.438	125.359	168.604	58.9646	-80.9868	-65.9848	170.899	-173.803	100.542	99.3783	178.577	-148.866	35.7734	0
869.57	-135.569	22.1099	117.192	61.1408	149.957	-51.0647	-83.361	-112.527	-72.963	79.1263	-144.523	155.042	-72.7329	-1.73469	0
870.57	-135.693	-35.5731	100.796	-89.9132	109.311	167.808	78.2588	147.085	-94.7835	-66.8224	156.517	-23.7727	-83.6252	63.32	0
871.569	-169.894	129.869	-140.495	-103.374	-52.1141	39.1652	42.2565	52.7951	173.613	26.6366	-86.216	122.123	106.558	66.8329	0
872.569	-109.812	169.177	171.574	40.1474	90.8912	7.91264	-3.14638	-77.2944	88.8401	-168.108	98.5138	159.952	168.142	76.6403	0
873.568	-23.9342	79.0422	-44.2072	-97.5515	-141.499	-20.9095	-176.61	-33.2402	-118.684	-155.965	164.675	-152.258	87.8235	-152.43	0
874.568	-140.263	-46.4454	92.3253	152.632	157.896	56.9001	84.5558	1.75453	-178.378	148.557	49.0633	-85.5082	-159.522	85.5096	0
875.567	155.847	-76.3637	24.7544	69.1198	139.111	-67.6696	45.8201	-90.2121	-161.963	-148.198	-169.568	-56.5733	-153.009	-127.483	0
876.567	158.076	75.7876	151.035	-102.755	-161.391	-108.516	15.5919	46.4892	113.108	-82.7915	116.446	-82.5469	-160.323	-99.9509	0
877.566	125.948	-173.03	-131.945	-128.738	-170.478	179.08	47.7245	-17.8705	145.894	158.525	105.808	176.387	-82.4531	104.45	0
878.566	141.167	146.405	146.023	-159.574	153.173	66.5968	20.3847	-64.5867	130.933	148.38	125.639	142.428	109.761	-154.314	0
879.565	-20.6408	-56.1395	-23.5067	-52.327	-19.0911	-51.6106	-77.7864	30.4688	-57.7643	-51.6895	-65.664	-48.5119	-64.7253	-147.001	0
880.565	-18.3147	-4.82449	-71.9956	15.4403	-20.0676	164.086	56.7439	-4.27284	-67.5416	-16.7728	-32.6889	-73.2476	-34.331	-68.7282	0
881.565	-13.3741	-31.182	-130.842	43.6255	29.2461	141.037	1.2847	68.7174	-71.165	-80.2411	-13.1694	-75.9487	178.026	139.028	0
882.564	-158.533	16.0421	-46.3139	79.0381	114.974	-34.295	62.6887	-3.23896	-110.471	-75.5987	-62.954	-7.47265	61.8899	52.0809	0
883.564	108.777	16.9034	-34.6939	72.2683	153.415	-40.759	-147.778	151.29	-49.5232	-83.7768	-6.37412	-127.699	-48.7922	154.731	0
884.563	-102.712	-83.5035	-46.0536	-84.2218	5.34427	-166.682	129.316	-7.87795	-88.984	34.4417	-17.9007	-134.102	-172.978	-23.2902	0
885.563	5.49043	-22.1876	-139.603	90.8824	-178.746	85.1326	-123.188	-61.288	-122.525	-98.2564	65.4024	-68.6033	-84.3386	-67.1603	0
886.562	-47.6966	-1.92936	-71.7133	-150.488	53.0355	166.621	64.0046	3.52077	-152.654	-91.9338	17.4094	-52.0084	-89.9175	-8.30871	0
887.562	92.9001	20.5942	-137.036	105.106	89.6589	18.8754	68.2348	104.806	151.887	9.39653	-38.8954	117.532	-54.1564	101.867	0
888.561	-134.887	-132.752	176.898	-4.89204	-88.0501	10.0118	-135.81	-164.45	-92.7598	-55.4857	143.326	-99.251	-36.8046	-40.7289	0
889.561	135.029	43.3625	-113.53	80.9305	40.2566	151.535	3.70348	-56.9502	71.3303	111.806	-20.3406	-38.8587	-112.166	-156.943	0
890.56	-52.5252	-157.932	140.879	23.3163	-27.8767	-55.0492	164.436	118.885	-166.639	-84.0777	-55.6103	156.258	-137.994	156.54	0
891.56	-163.325	-97.743	89.179	31.562	-9.90956	76.2477	112.053	-96.581	143.602	109.077	-47.9889	147.861	-89.4811	109.863	0
892.559	-126.459	90.9217	25.7762	29.539	61.1893	-115.778	-109.298	-53.8714	-136.994	-21.1936	-17.129	171.376	-123.09	-90.1723	0
893.559	-161.977	75.4588	159.718	120.701	-64.6367	119.138	129.355	-167.924	36.8167	28.7983	145.154	-33.5803	-175.285	-80.8025	0
894.558	164.332	-120.529	-100.499	-168.204	96.7103	63.535	-75.3591	3.13743	62.6736	49.412	122.23	-96.1739	-119.898	-87.9407	0
895.558	-65.3853	102.253	56.2167	142.573	151.016	121.833	163.881	122.041	-135.384	12.1385	5.70164	168.447	-104.602	-96.5226	0
896.557	124.043	141.745	61.6736	39.5749	22.0791	156.525	155.382	79.6877	-114.775	-104.803	-70.3411	129.952	-101.026	85.2521	0
897.557	-109.58	158.225	174.196	-152.13	128.029	-177.96	-100.946	-167.269	-64.4559	-7.67213	-57.8108	-163.471	59.5087	-82.1372	0
898.556	-68.3568	-57.0196	133.963	-162.119	82.473	-60.3962	-101.679	-50.9846	-160.694	-69.3311	124.913	-6.16002	101.878	-112.989	0
899.556	-117.037	94.2342	-87.1177	-30.4912	55.5406	92.7071	147.636	-122.572	-98.1939	-33.5296	-17.9681	-83.7857	-111.895	-140.136	0
900.555	139.171	99.8165	16.7891	0.424218	-77.604	91.6246	-50.9691	103.113	-36.0936	-10.0676	11.45	-117.648	-139.959	126.514	0
901.555	176.382	146.642	11.8366	2.80625	74.3065	-86.7168	-51.6937	-93.3686	-93.6845	-84.0174	70.1105	-101.791	-115.622	-55.2697	0
902.554	-121.817	-37.4375	-153.947	-158.831	118.456	88.6068	97.6037	127.368	-89.1351	-141.741	38.6181	-109.314	-124.214	-20.9929	0
903.554	84.0222	-163.924	104.18	-169.276	45.1628	13.5533	173.074	172.907	106.409	132.391	-171.595	-143.419	-152.098	-64.2498	0
904.553	-90.3234	45.2705	166.045	-25.32	20.5953	59.213	176.57	-153.874	-51.2326	-79.8545	88.7339	76.0568	-84.0106	-105.112	0
905.553	-121.179	-90.2651	-44.1645	-19.9928	68.6094	-20.4059	98.6132	-153.821	-11.4616	-20.2189	-54.2039	84.8265	77.6778	102.558	0
906.552	-57.6975	-154.51	49.0927	49.6551	36.363	-103.663	-45.2514	-92.4913	-79.9457	-27.8761	-179.062	2.31075	-104.612	54.6838	0
907.552	22.0346	49.2432	66.7647	-38.7273	28.8285	-64.7012	36.0082	-108.103	-157.062	-80.6331	90.925	-79.3528	-170.677	-179.182	0
908.551	130.534	4.31261	110.907	-12.9781	102.16	106.752	-25.7039	-110.38	-67.5774	-102.681	14.4248	-117.363	-108.714	62.2173	0
909.551	-111.619	-27.4449	-44.3056	-19.7982	58.9987	80.107	-48.9471	-175.276	-5.00828	-101.922	-47.0017	-124.704	-60.8808	-17.6434	0
910.55	150.22	-91.4847	-176.906	-42.203	50.5415	-153.929	167.221	3.18465	12.3466	116.298	-27.8114	-155.095	-90.7537	108.042	0
911.55	163.622	165.447	39.712	-72.4403	107.931	-145.287	140.867	-117.037	-150.946	138.709	-149.628	177.67	-165.426	27.1566	0
912.549	-27.3831	-116.567	-175.679	28.726	9.24662	-36.9454	139.981	-136.251	-97.9215	-140.527	13.2334	-61.6598	-59.5458	99.6814	0
913.549	-32.1833	-85.5908	-108.595	-143.61	-123.404	108.532	-114.56	-177.571	-87.1354	161.658	-3.59906	-70.5634	-103.971	-176.297	0
914.548	85.0241	49.3956	163.948	146.549	96.3241	-33.1593	-138.698	-19.9563	-43.8898	-2.51788	-160.512	-0.0745073	-139.013	-158.607	0
915.548	-149.468	-168.011	66.6549	26.5211	82.1032	-54.4009	-120.235	-50.2315	56.3082	106.723	138.893	-170.458	-20.0344	-47.5645	0
916.547	-128.165	32.7445	-145.094	130.09	-14.4293	-120.838	-1.21729	62.4015	138.962	-106.932	136.487	126.857	21.6271	-19.7564	0
917.547	100.348	46.5539	-14.8289	-36.7196	156.829	170.18	-127.906	129.187	-177.283	-153.071	-172.418	-147.973	109.354	-106.614	0
918.546	20.3783	-57.7543	29.6666	35.0696	-174.204	161.004	146.103	-15.3586	173.952	68.0289	98.0136	-119.791	-69.6853	166.93	0
919.546	14.0136	-84.7542	142.167	161.69	-106.446	158.227	-24.4324	60.9072	-127.667	-117.921	112.871	81.1882	-96.6247	8.65117	0
920.545	13.8524	103.158	11.396	-32.2551	112.689	-63.5701	83.9521	-164.174	19.0307	-104.21	179.436	-162.949	118.838	132.379	0
921.545	115.637	-125.011	91.022	45.7304	70.1419	-7.56176	107.658	66.312	-137.818	-133.925	-168.465	51.3884	69.7229	146.117	0
922.544	62.3083	64.2438	-142.948	-158.702	-107.928	-141.718	108.882	-145.5	113.91	-172.657	-110.539	133.356	-167.577	-40.8095	0
923.544	-56.9714	-15.0825	169.495	-174.073	92.8906	-142.318	83.745	17.0502	109.518	117.486	-85.0022	156.804	-110.937	-159.314	0
924.543	0.580878	-150.959	-69.9835	159.454	38.3469	-172.275	135.405	-162.848	-87.9127	15.903	-124.588	-132.318	-109.898	-41.4768	0
925.543	-106.97	140.179	-173.718	-20.8284	168.874	-95.8735	-175.95	-53.1564	-133.225	155.397	-169.261	-123.935	-38.4116	124.617	0
926.542	-71.4882	-178.242	-179.268	58.7235	92.5628	155.863	121.644	-176.014	-178.854	-157.119	173.681	-154.786	-109.57	94.4345	0
927.542	146.919	-0.725554	-9.40946	-57.9443	0.761778	-29.5526	-73.8619	-10.6328	-6.49848	14.2844	-0.533451	48.6036	95.1207	80.0531	0
928.541	-147.053	-20.143	65.0899	-51.1258	-3.43288	-68.4619	-56.9335	-104.393	-7.38383	53.6146	31.4855	-93.7903	-122.457	178.391	0
929.541	-175.369	-19.5452	-62.0024	-51.0385	31.5385	-32.5316	-26.6577	108.41	19.9979	105.921	130.737	-34.5703	-97.3655	176.938	0
930.54	107.086	-165.329	1.91084	-14.0808	91.5715	-168.453	158.141	107.839	-91.3672	-43.3424	-6.70699	19.592	-17.3391	170.254	0
931.54	-60.5448	-1.35399	9.09057	-148.366	-73.7762	62.3403	-104.219	144.762	-22.4321	90.6157	20.1574	-165.765	-22.7399	166.381	0
932.539	154.63	20.5705	39.8656	-149.659	170.095	127.887	-88.2782	171.351	-77.2365	89.6734	-138.437	143.464	-131.736	133.454	0
933.539	-117.505	37.6045	-82.3127	92.9087	79.7504	-47.111	-99.8172	148.411	-65.9951	64.0537	63.5795	62.2572	176.61	-18.2783	0
934.538	-80.3369	-6.26488	60.5667	131.762	-13.2882	-105.812	133.886	-170.875	-58.3646	-41.2039	42.4648	-17.6036	-160.468	-47.6626	0
935.538	-109.629	17.9464	45.0063	-98.7865	-88.262	-72.0903	-66.0294	-144.543	-69.7667	5.49219	81.5871	-75.2412	87.8639	108.72	0
936.537	-73.2648	-95.6627	136.423	42.6903	-8.32308	-8.77889	-92.1145	-130.333	98.8003	-66.6835	-51.3244	-54.8614	-3.43319	-141.413	0
937.537	-62.3608	-57.8718	-177.224	-112.325	60.3365	-36.3907	145.208	140.749	-3.47911	25.0682	170.861	81.0899	-114.946	-27.4688	0
938.536	144.589	151.761	107.674	62.0311	-33.724	147.494	-64.7457	-149.987	13.533	50.3561	-1.92444	25.0826	-149.453	41.8952	0
939.536	-105.064	115.922	121.433	-75.7683	13.5317	42.4807	149.376	13.6274	85.9308	167.779	168.459	23.162	-150.881	3.51316	0
940.535	106.786	-23.2961	-93.6	167.407	116.971	-38.6702	115.769	30.2484	-68.1159	-77.4184	7.37086	-117.449	-125.688	20.389	0
941.535	24.8713	162.627	-104.221	1.28551	109.458	-108.887	144.628	-53.7334	-90.9219	-152.173	25.6459	168.258	79.0848	-83.4073	0
942.534	100.715	-108.889	33.7486	43.7939	-4.42624	111.173	-9.19971	92.4832	3.28722	81.6239	3.22512	75.219	-21.5264	-3.00441	0
943.534	172.419	167.471	-14.1332	-84.9474	18.277	86.6071	-1.33125	76.0682	-68.3752	-117.178	77.3813	82.877	131.745	-165.175	0
944.533	20.1041	-49.5535	-54.6268	-33.0406	84.0496	107.332	-25.6603	41.9467	137.408	-31.1797	163.032	-36.4106	58.1585	91.9688	0
945.533	-132.399	-178.004	-11.0154	9.46985	-42.2353	-65.1756	-140.349	93.2901	150.024	-13.4201	24.8538	56.0143	-19.6196	55.7605	0
946.532	92.7348	86.1719	-93.0805	-68.7654	157.686	-145.776	-17.0379	160.124	53.7796	53.9935	-92.3374	-86.3146	-78.0905	71.3694	0
947.532	-148.387	-132.946	-60.3342	-64.1558	3.57209	-91.8621	-111.848	100.211	-166.133	90.0506	-4.52116	169.48	-69.3634	131.039	0
948.531	-157.949	59.1527	49.5242	46.3654	-119.464	-57.7253	13.3531	91.7091	-13.2064	17.3065	56.631	-176.158	179.407	104.71	0
949.531	-22.5364	-155.643	79.0655	-79.7943	65.0783	-104.62	-122.552	-19.4058	-36.1671	51.726	-46.608	-124.572	81.9674	9.6224	0
950.53	84.3208	-131.224	161.553	-24.2113	-102.714	-100.346	176.177	112.562	-0.0824116	174.516	133.248	116.046	-145.649	72.1325	0
951.53	-95.1459	135.488	50.3966	70.327	-123.453	91.0206	-126.152	144.398	-116.41	32.3247	40.0509	149.045	-53.8237	-81.7365	0
952.529	17.4439	122.581	-97.694	-130.73	29.924	-162.915	80.7985	129.476	-58.9179	-86.0442	-166.984	-103.297	-41.1553	34.3718	0
953.529	-139.194	174.222	-116.215	94.8569	77.359	-39.8004	74.6012	-119.706	-85.1134	-148.154	54.72	-161.724	-105.406	-147.542	0
954.528	-45.8391	154.97	8.30529	35.315	-55.1186	-131.823	-172.321	13.0417	-114.762	24.4022	177.254	126.885	-142.573	-63.1524	0
955.528	-34.8555	-92.3716	-41.5559	166.84	174.712	2.8779	-17.1952	17.2379	-123.182	174.544	-103.465	-121.755	-57.6276	-38.1755	0
956.527	-136.08	133.75	-55.8453	-155.314	-28.4964	75.524	8.5559	132.074	-141.746	-27.2716	70.9608	0.819558	-137.079	122.747	0
957.527	-130.381	68.579	-86.8105	104.231	9.23895	-165.281	66.0523	9.77265	-45.633	100.47	6.73839	114.907	-99.2134	-39.1369	0
958.526	12.7455	-78.6036	-134.333	25.4518	160.641	-55.0284	179.474	-110.133	-66.3663	78.778	5.92238	-33.1058	-122.533	23.5933	0
959.526	-165.535	45.7204	13.3723	113.126	46.3089	-38.1947	-136.78	6.29621	138.779	-177.446	-111.866	-11.0063	-50.9904	-85.9015	0
960.525	170.301	55.8935	-161.056	81.3285	159.275	-53.3736	-6.48085	170.413	-122.483	56.067	-86.5061	147.092	-104.216	79.3156	0
961.525	129.672	-150.149	-92.9274	65.3807	129.543	-161.448	80.0836	-105.973	-56.686	-55.8672	139.492	-120.324	-23.4007	-70.5405	0
962.525	-133.063	61.4647	-153.847	125.126	-84.912	-83.3598	122.763	-83.9685	37.0241	-86.0115	3.68386	165.59	-42.6303	0.473515	0
963.524	-5.22728	164.309	-58.3193	145.566	66.111	3.45939	0.840835	-145.752	-161.757	80.9443	-138.657	7.54493	-119.052	-121.596	0
964.524	-89.9395	76.5963	-29.1223	140.008	152.374	-33.0358	166.742	-101.272	137.285	-88.3538	110.256	-49.0983	-44.2873	6.58579	0
965.523	165.741	-129.157	-58.3399	26.0171	121.761	93.9882	-108.598	103.991	-140.991	149.538	23.6754	112.097	-92.5137	93.9116	0
966.523	-60.0906	-94.1302	-128.871	85.797	51.2105	58.3934	28.0311	-8.23269	-49.8349	-149.328	133.725	45.3633	-112.025	4.35305	0
967.522	-60.1172	38.0596	-113.377	128.82	-40.8848	-2.02159	-8.45218	-47.266	-85.7494	-34.4067	108.249	-17.9981	-136.669	-124.998	0
968.522	-151.391	-65.4335	-92.0079	-44.9605	16.0962	-104.082	-2.88934	74.0887	-85.8186	-106.962	119.042	-84.6498	5.82324	70.3779	0
969.521	-45.9627	39.7413	71.091	-99.3096	128.813	-137.695	166.68	-97.3816	-178.653	-131.251	163.433	-170.774	-79.0083	-69.0259	0
970.521	-155.087	-93.8635	137.611	-126.288	133.387	-26.7668	150.518	-146.218	-94.7479	-46.3057	27.3497	117.779	-140.138	-32.2654	0
971.52	-15.731	-20.6881	-35.3486	136.597	177.868	60.6625	21.9234	34.7815	-132.79	93.8436	-169.736	-159.632	-46.445	-0.425745	0
972.52	-84.3877	-6.09091	175.783	-49.4347	145.845	-9.25868	-66.8306	133.265	-111.056	-86.3517	-118.179	178.845	-58.1264	38.2434	0
973.519	-86.719	-63.7055	42.8867	-56.3644	-102.122	13.5962	-179.773	166.137	-63.8477	-74.0046	-123.809	12.8106	-103.404	-129.853	0
974.519	-90.447	-70.7689	-130.304	-134.71	-33.8702	142.759	-157.718	-11.5355	-87.3622	-61.4664	-119.031	179.302	-82.2657	-28.294	0
975.518	99.131	104.204	104.126	96.076	107.647	36.0604	129.513	85.8769	89.7592	99.3511	83.1085	90.0728	107.766	115.389	0
976.518	105.567	164.357	81.0423	122.629	76.2605	78.3882	126.753	138.513	137.423	142.395	-176.868	68.0717	158.418	-170.548	0
977.517	90.7732	71.0805	101.481	24.5574	101.574	-31.6489	139.372	3.34004	-94.7922	146.854	75.6464	-55.3191	-154.171	-85.606	0
978.517	-22.0439	129.273	-89.8812	-94.3512	121.176	-162.492	-39.8128	-0.941413	-50.6962	126.128	-92.2123	76.1384	-30.8874	153.077	0
979.516	136.402	14.256	-163.587	131.915	-45.5462	-167.571	-91.3311	63.2305	-157.72	-19.6826	-7.52029	-152.668	-32.0257	-22.803	0
980.516	90.0672	47.5911	72.8116	33.5285	69.4791	-37.2696	151.792	-24.984	37.8639	79.9516	25.9073	-15.8128	-133.921	36.1122	0
981.515	114.531	42.6511	154.153	15.9546	64.0545	-42.6373	66.4951	112.909	-175.652	-173.265	-144.581	154.079	-82.7959	-15.2697	0
982.515	-161.099	103.374	83.0849	-98.9347	61.6692	12.7682	-12.7502	95.1875	-53.2321	53.8699	-169.555	34.132	-135.578	-15.997	0
983.514	157.516	-118.059	-39.0369	47.3372	-24.4426	100.981	111.145	155.123	102.632	102.848	114.318	74.2281	-152.524	-114.542	0
984.514	107.955	64.2867	-34.684	-111.636	21.207	2.91106	146.36	-19.2204	143.044	-31.0649	178.007	96.8739	-84.8736	-60.0245	0
985.513	82.7413	126.514	169.882	145.568	127.447	15.1164	-68.7438	43.5701	-129.189	-174.072	-26.5942	-38.3988	-58.0186	134.863	0
986.513	-111.063	-114.357	-143.556	-137.573	53.853	81.3834	-119.383	87.022	-47.7212	-1.41276	138.905	-118.499	-15.8759	122.584	0
987.512	113.723	60.9905	101.241	-68.1899	102.935	-49.3697	47.8909	137.514	-99.3229	-100.772	-172.839	-136.723	-2.70481	163.745	0
988.512	-132.698	93.8315	-130.251	-106.175	113.917	107.634	116.281	-124.168	-60.7286	-6.16919	174.112	141.228	-142.886	156.402	0
989.511	10.7802	67.3361	-93.4223	-87.9218	110.166	135.373	71.7233	-114.274	-175.756	-128.919	165.16	40.3159	4.13513	-115.642	0
990.511	-146.868	49.0355	36.6743	-153.669	68.5683	129.325	107.788	11.5925	-20.5164	-78.6851	-156.1	104.779	-155.991	-33.8385	0
991.51	118.117	79.2547	-71.8995	-4.70435	-20.3298	156.703	-20.6638	-77.4723	-127.509	-1.04411	-1.09577	-72.6467	-9.62683	-165.765	0
992.51	33.8048	115.176	-39.1952	-88.885	76.8414	33.9969	26.8142	-44.3633	-48.7136	-51.2627	-128.883	-82.8391	-93.6895	15.5389	0
993.509	-174.214	82.7742	23.5413	178.95	101.905	124.555	-78.4058	54.7463	-111.056	171.29	-49.2167	-157.23	-90.807	-156.239	0
994.509	55.2138	-92.085	158.273	-96.501	108.806	92.729	167.744	-86.8451	153.257	151.815	-164.487	-131.837	-71.7949	147.36	0
995.508	-148.387	19.0492	-120.783	126.395	16.5917	-94.277	-90.3627	-0.139969	49.0255	-105.315	-41.6853	140.439	-172.819	90.0487	0
996.508	-142.6	20.0813	36.0149	148.981	119.709	-16.0088	-108.13	-155.942	-99.9978	-174.99	56.7652	-162.242	-124.853	68.4392	0
997.507	59.3135	9.72482	-90.6196	178.621	102.4	-138.469	115.512	113.786	11.3239	47.5294	-35.9899	-152.251	-79.6696	166.87	0
998.507	-55.6616	75.1321	16.9285	11.2165	-5.02574	86.0973	141.412	-96.5496	-20.8579	83.1214	12.5271	108.869	-102.77	-86.6315	0
999.506	171.123	151.342	-21.4095	-85.0617	148.526	135.637	-102.238	-58.1561	157.376	-85.1271	110.005	-2.25827	-3.28085	134.094	0
1000.51	156.991	-96.2972	-151.118	93.4812	-33.4371	-49.4472	89.182	-31.9507	-150.129	117.557	-148.387	-53.0757	-66.8191	-126.455	0
1001.51	-57.6471	94.5489	-91.6623	63.5129	17.6203	-23.2556	-114.854	-40.0727	-46.2565	83.9429	-118.917	-94.7425	-89.2153	81.1622	0
1002.5	-26.5622	-102.944	95.6599	-133.783	99.9052	3.60472	-17.7327	-130.92	-59.0392	153.007	12.3419	105.46	-134.536	-15.8454	0
1003.5	145.255	84.9834	-102.35	44.9875	121.376	148.298	160.567	-147.607	-123.722	-98.6505	164.993	-66.2317	-105.255	3.29879	0
1004.5	-98.4173	-28.8353	112.233	-85.9269	4.65876	50.8474	43.172	129.714	50.6495	-144.73	-140.951	-171.706	-62.8167	12.0571	0
1005.5	75.551	-6.41425	-73.6508	-105.767	69.6774	122.853	164.73	109.1	44.584	-65.1118	-100.4	49.3731	-97.9712	-112.249	0
1006.5	-91.6741	102.319	101.537	-43.5965	66.8784	95.8963	-173.123	-17.6047	-18.258	-89.4918	-178.51	120.01	-133.242	161.431	0
1007.5	48.9345	86.3893	28.5239	-165.671	164.967	167.965	-139.529	-132.091	-15.1122	93.1499	-146.134	-39.3945	148.175	-139.493	0
1008.5	-89.2716	37.812	178.985	68.7756	-17.4397	-59.9922	-108.043	-117.946	-93.9078	143.793	-21.4733	118.334	-72.1436	-156.083	0
1009.5	-146.724	-14.6521	71.5762	-157.89	90.7127	20.9642	-129.954	-24.9829	43.8858	134.163	-162.846	-100.735	169.393	-46.2786	0
1010.5	-151.569	-18.4359	-155.216	-67.2974	59.3062	143.024	-5.8767	-31.5915	-83.707	11.6591	-24.3541	160.433	-123.049	30.7975	0
1011.5	-128.998	49.4297	-150.964	4.145	-69.9407	2.84134	174.466	40.8617	148.811	-55.1882	90.7206	-122.915	-66.2173	6.67772	0
1012.5	-134.202	149.612	-81.9276	59.8947	-3.99856	-168.166	-104.174	174.38	143.759	97.453	-119.359	-131.686	102.319	48.0457	0
1013.5	120.411	-68.463	-157.584	72.2052	87.1298	159.693	-158.067	-156.451	111.061	54.0789	-45.7833	44.0736	-174.647	-76.0796	0
1014.5	-174.875	47.7532	-64.5948	-124.51	176.358	23.0754	86.3392	116.602	-153.559	37.1845	63.0765	-30.5303	167.749	156.809	0
1015.5	111.433	13.2279	-129.641	92.7478	68.709	-28.0614	28.7389	-171.178	-15.7918	-9.67537	43.2285	134.486	-19.8623	154.549	0
1016.5	-52.2869	-98.1407	21.1303	-9.36066	-142.219	-94.9923	130.172	-33.6906	35.6437	81.928	0.446729	122.478	-39.9804	-148.714	0
1017.5	-83.5481	26.6633	151.285	34.9588	122.11	-49.4888	41.8147	39.3009	-126.656	-77.9039	132.151	-34.5159	-36.7657	122.307	0
1018.5	6.74616	145.628	-48.0637	-54.6725	119.782	-12.844	-70.2909	105.408	-151.895	-1.63402	-142.423	-45.1077	-161.639	-136.418	0
1019.5	-28.6824	150.291	-92.0504	143.214	74.2617	83.9038	-17.7181	-127.909	-140.359	63.3475	-5.26263	179.921	-155.579	51.3681	0
1020.5	-124.066	-15.9556	-95.5744	-20.075	58.2576	82.3202	129.593	-171.619	-25.8902	-0.0737031	176.249	163.614	-164.624	-83.1353	0
1021.5	-170.121	-4.45285	-85.3175	16.8008	123.149	113.402	82.2144	-121.338	-65.4629	44.1876	-5.10614	-159.849	-111.399	15.3551	0
1022.49	59.162	-144.628	-39.7325	18.6429	11.7503	-24.7091	110.068	-61.0155	-159.249	122.056	159.822	40.0223	179.56	39.9254	0
	0
	0.999506
	1.99901
	2.99852
	3.99803
	4.99753
	5.99704
	6.99654
	7.99605
	8.99556
	9.99506
	10.9946
	11.9941
	12.9936
	13.9931
	14.9926
	15.9921
	16.9916
	17.9911
	18.9906
	19.9901
	20.9896
	21.9891
	22.9886
	23.9882
	24.9877
	25.9872
	26.9867
	27.9862
	28.9857
	29.9852
	30.9847
	31.9842
	32.9837
	33.9832
	34.9827
	35.9822
	36.9817
	37.9812
	38.9807
	39.9802
	40.9798
	41.9793
	42.9788
	43.9783
	44.9778
	45.9773
	46.9768
	47.9763
	48.9758
	49.9753
	50.9748
	51.9743
	52.9738
	53.9733
	54.9728
	55.9723
	56.9719
	57.9714
	58.9709
	59.9704
	60.9699
	61.9694
	62.9689
	63.9684
	64.9679
	65.9674
	66.9669
	67.9664
	68.9659
	69.9654
	70.9649
	71.9644
	72.964
	73.9635
	74.963
	75.9625
	76.962
	77.9615
	78.961
	79.9605
	80.96
	81.9595
	82.959
	83.9585
	84.958
	85.9575
	86.957
	87.9565
	88.9561
	89.9556
	90.9551
	91.9546
	92.9541
	93.9536
	94.9531
	95.9526
	96.9521
	97.9516
	98.9511
	99.9506
	100.95
	101.95
	102.949
	103.949
	104.948
	105.948
	106.947
	107.947
	108.946
	109.946
	110.945
	111.945
	112.944
	113.944
	114.943
	115.943
	116.942
	117.942
	118.941
	119.941
	120.94
	121.94
	122.939
	123.939
	124.938
	125.938
	126.937
	127.937
	128.936
	129.936
	130.935
	131.935
	132.934
	133.934
	134.933
	135.933
	136.932
	137.932
	138.931
	139.931
	140.93
	141.93
	142.929
	143.929
	144.928
	145.928
	146.927
	147.927
	148.926
	149.926
	150.925
	151.925
	152.924
	153.924
	154.923
	155.923
	156.922
	157.922
	158.921
	159.921
	160.921
	161.92
	162.92
	163.919
	164.919
	165.918
	166.918
	167.917
	168.917
	169.916
	170.916
	171.915
	172.915
	173.914
	174.914
	175.913
	176.913
	177.912
	178.912
	179.911
	180.911
	181.91
	182.91
	183.909
	184.909
	185.908
	186.908
	187.907
	188.907
	189.906
	190.906
	191.905
	192.905
	193.904
	194.904
	195.903
	196.903
	197.902
	198.902
	199.901
	200.901
	201.9
	202.9
	203.899
	204.899
	205.898
	206.898
	207.897
	208.897
	209.896
	210.896
	211.895
	212.895
	213.894
	214.894
	215.893
	216.893
	217.892
	218.892
	219.891
	220.891
	221.89
	222.89
	223.889
	224.889
	225.888
	226.888
	227.887
	228.887
	229.886
	230.886
	231.885
	232.885
	233.884
	234.884
	235.883
	236.883
	237.882
	238.882
	239.881
	240.881
	241.881
	242.88
	243.88
	244.879
	245.879
	246.878
	247.878
	248.877
	249.877
	250.876
	251.876
	252.875
	253.875
	254.874
	255.874
	256.873
	257.873
	258.872
	259.872
	260.871
	261.871
	262.87
	263.87
	264.869
	265.869
	266.868
	267.868
	268.867
	269.867
	270.866
	271.866
	272.865
	273.865
	274.864
	275.864
	276.863
	277.863
	278.862
	279.862
	280.861
	281.861
	282.86
	283.86
	284.859
	285.859
	286.858
	287.858
	288.857
	289.857
	290.856
	291.856
	292.855
	293.855
	294.854
	295.854
	296.853
	297.853
	298.852
	299.852
	300.851
	301.851
	302.85
	303.85
	304.849
	305.849
	306.848
	307.848
	308.847
	309.847
	310.846
	311.846
	312.845
	313.845
	314.844
	315.844
	316.843
	317.843
	318.842
	319.842
	320.841
	321.841
	322.841
	323.84
	324.84
	325.839
	326.839
	327.838
	328.838
	329.837
	330.837
	331.836
	332.836
	333.835
	334.835
	335.834
	336.834
	337.833
	338.833
	339.832
	340.832
	341.831
	342.831
	343.83
	344.83
	345.829
	346.829
	347.828
	348.828
	349.827
	350.827
	351.826
	352.826
	353.825
	354.825
	355.824
	356.824
	357.823
	358.823
	359.822
	360.822
	361.821
	362.821
	363.82
	364.82
	365.819
	366.819
	367.818
	368.818
	369.817
	370.817
	371.816
	372.816
	373.815
	374.815
	375.814
	376.814
	377.813
	378.813
	379.812
	380.812
	381.811
	382.811
	383.81
	384.81
	385.809
	386.809
	387.808
	388.808
	389.807
	390.807
	391.806
	392.806
	393.805
	394.805
	395.804
	396.804
	397.803
	398.803
	399.803
	400.802
	401.802
	402.801
	403.801
	404.8
	405.8
	406.799
	407.799
	408.798
	409.798
	410.797
	411.797
	412.796
	413.796
	414.795
	415.795
	416.794
	417.794
	418.793
	419.793
	420.792
	421.792
	422.791
	423.791
	424.79
	425.79
	426.789
	427.789
	428.788
	429.788
	430.787
	431.787
	432.786
	433.786
	434.785
	435.785
	436.784
	437.784
	438.783
	439.783
	440.782
	441.782
	442.781
	443.781
	444.78
	445.78
	446.779
	447.779
	448.778
	449.778
	450.777
	451.777
	452.776
	453.776
	454.775
	455.775
	456.774
	457.774
	458.773
	459.773
	460.772
	461.772
	462.771
	463.771
	464.77
	465.77
	466.769
	467.769
	468.768
	469.768
	470.767
	471.767
	472.766
	473.766
	474.765
	475.765
	476.764
	477.764
	478.763
	479.763
	480.762
	481.762
	482.762
	483.761
	484.761
	485.76
	486.76
	487.759
	488.759
	489.758
	490.758
	491.757
	492.757
	493.756
	494.756
	495.755
	496.755
	497.754
	498.754
	499.753
	500.753
	501.752
	502.752
	503.751
	504.751
	505.75
	506.75
	507.749
	508.749
	509.748
	510.748
	511.747
	512.747
	513.746
	514.746
	515.745
	516.745
	517.744
	518.744
	519.743
	520.743
	521.742
	522.742
	523.741
	524.741
	525.74
	526.74
	527.739
	528.739
	529.738
	530.738
	531.737
	532.737
	533.736
	534.736
	535.735
	536.735
	537.734
	538.734
	539.733
	540.733
	541.732
	542.732
	543.731
	544.731
	545.73
	546.73
	547.729
	548.729
	549.728
	550.728
	551.727
	552.727
	553.726
	554.726
	555.725
	556.725
	557.724
	558.724
	559.723
	560.723
	561.723
	562.722
	563.722
	564.721
	565.721
	566.72
	567.72
	568.719
	569.719
	570.718
	571.718
	572.717
	573.717
	574.716
	575.716
	576.715
	577.715
	578.714
	579.714
	580.713
	581.713
	582.712
	583.712
	584.711
	585.711
	586.71
	587.71
	588.709
	589.709
	590.708
	591.708
	592.707
	593.707
	594.706
	595.706
	596.705
	597.705
	598.704
	599.704
	600.703
	601.703
	602.702
	603.702
	604.701
	605.701
	606.7
	607.7
	608.699
	609.699
	610.698
	611.698
	612.697
	613.697
	614.696
	615.696
	616.695
	617.695
	618.694
	619.694
	620.693
	621.693
	622.692
	623.692
	624.691
	625.691
	626.69
	627.69
	628.689
	629.689
	630.688
	631.688
	632.687
	633.687
	634.686
	635.686
	636.685
	637.685
	638.684
	639.684
	640.683
	641.683
	642.683
	643.682
	644.682
	645.681
	646.681
	647.68
	648.68
	649.679
	650.679
	651.678
	652.678
	653.677
	654.677
	655.676
	656.676
	657.675
	658.675
	659.674
	660.674
	661.673
	662.673
	663.672
	664.672
	665.671
	666.671
	667.67
	668.67
	669.669
	670.669
	671.668
	672.668
	673.667
	674.667
	675.666
	676.666
	677.665
	678.665
	679.664
	680.664
	681.663
	682.663
	683.662
	684.662
	685.661
	686.661
	687.66
	688.66
	689.659
	690.659
	691.658
	692.658
	693.657
	694.657
	695.656
	696.656
	697.655
	698.655
	699.654
	700.654
	701.653
	702.653
	703.652
	704.652
	705.651
	706.651
	707.65
	708.65
	709.649
	710.649
	711.648
	712.648
	713.647
	714.647
	715.646
	716.646
	717.645
	718.645
	719.644
	720.644
	721.644
	722.643
	723.643
	724.642
	725.642
	726.641
	727.641
	728.64
	729.64
	730.639
	731.639
	732.638
	733.638
	734.637
	735.637
	736.636
	737.636
	738.635
	739.635
	740.634
	741.634
	742.633
	743.633
	744.632
	745.632
	746.631
	747.631
	748.63
	749.63
	750.629
	751.629
	752.628
	753.628
	754.627
	755.627
	756.626
	757.626
	758.625
	759.625
	760.624
	761.624
	762.623
	763.623
	764.622
	765.622
	766.621
	767.621
	768.62
	769.62
	770.619
	771.619
	772.618
	773.618
	774.617
	775.617
	776.616
	777.616
	778.615
	779.615
	780.614
	781.614
	782.613
	783.613
	784.612
	785.612
	786.611
	787.611
	788.61
	789.61
	790.609
	791.609
	792.608
	793.608
	794.607
	795.607
	796.606
	797.606
	798.605
	799.605
	800.605
	801.604
	802.604
	803.603
	804.603
	805.602
	806.602
	807.601
	808.601
	809.6
	810.6
	811.599
	812.599
	813.598
	814.598
	815.597
	816.597
	817.596
	818.596
	819.595
	820.595
	821.594
	822.594
	823.593
	824.593
	825.592
	826.592
	827.591
	828.591
	829.59
	830.59
	831.589
	832.589
	833.588
	834.588
	835.587
	836.587
	837.586
	838.586
	839.585
	840.585
	841.584
	842.584
	843.583
	844.583
	845.582
	846.582
	847.581
	848.581
	849.58
	850.58
	851.579
	852.579
	853.578
	854.578
	855.577
	856.577
	857.576
	858.576
	859.575
	860.575
	861.574
	862.574
	863.573
	864.573
	865.572
	866.572
	867.571
	868.571
	869.57
	870.57
	871.569
	872.569
	873.568
	874.568
	875.567
	876.567
	877.566
	878.566
	879.565
	880.565
	881.565
	882.564
	883.564
	884.563
	885.563
	886.562
	887.562
	888.561
	889.561
	890.56
	891.56
	892.559
	893.559
	894.558
	895.558
	896.557
	897.557
	898.556
	899.556
	900.555
	901.555
	902.554
	903.554
	904.553
	905.553
	906.552
	907.552
	908.551
	909.551
	910.55
	911.55
	912.549
	913.549
	914.548
	915.548
	916.547
	917.547
	918.546
	919.546
	920.545
	921.545
	922.544
	923.544
	924.543
	925.543
	926.542
	927.542
	928.541
	929.541
	930.54
	931.54
	932.539
	933.539
	934.538
	935.538
	936.537
	937.537
	938.536
	939.536
	940.535
	941.535
	942.534
	943.534
	944.533
	945.533
	946.532
	947.532
	948.531
	949.531
	950.53
	951.53
	952.529
	953.529
	954.528
	955.528
	956.527
	957.527
	958.526
	959.526
	960.525
	961.525
	962.525
	963.524
	964.524
	965.523
	966.523
	967.522
	968.522
	969.521
	970.521
	971.52
	972.52
	973.519
[truncated: 81 more rows]

## Sheet: M48_amp
Frequency	FF	70	60	50	40	30	20	10	AN10	AN20	AN30	AN40	AN50	AN60
0	5.1e-11	3.8583e-09	4.587e-09	1.1894e-08	1.996e-09	7.07e-10	8.777e-09	3.9747e-09	1.5123e-08	5.77e-09	3.019e-09	3.503e-10	8.992e-09	6.299e-09	0
0.999506	0.0013843	0.00053843	0.00057226	0.00048557	0.0014278	0.0019095	0.0026295	0.00029111	0.0014923	0.0020078	0.00034786	0.0017704	0.00083982	0.00079667	0
1.99901	0.00043838	0.00082775	0.00097054	0.00081885	0.00082619	0.00073903	0.00071272	0.00023268	0.00076783	0.00050968	0.00045655	0.0014159	0.0022103	0.00037913	0
2.99852	0.00062587	0.0017765	7.9366e-05	0.00048404	0.00038998	0.00014945	0.0010348	0.00038571	0.0004133	0.00039652	0.00020359	0.00063147	0.00061798	0.00016789	0
3.99803	0.00051479	0.00070857	6.9347e-05	0.00032692	0.00035539	0.00079209	0.00056088	0.00015535	0.00023546	0.00015728	0.00020302	0.0003555	0.0010836	0.00010248	0
4.99753	0.00026821	0.00074274	0.0001688	0.00032593	0.00024891	0.00053944	0.00071655	0.0002031	0.00029543	0.00041593	0.00018252	0.00083272	0.00087911	0.00022592	0
5.99704	0.00036572	0.00023673	0.0001074	0.00058632	0.00040071	0.00038928	0.00049095	0.00014981	6.6428e-05	0.00052927	0.00022126	0.0004252	0.00026657	0.000254	0
6.99654	0.00023907	0.00080896	0.0001039	0.00017399	0.0001044	0.00012223	0.00024669	3.0081e-05	0.0002804	0.00029632	0.00015887	0.00034324	0.00052365	0.00019462	0
7.99605	0.00037446	0.0004154	1.0179e-05	0.00032057	0.00023469	0.00011258	0.00016082	0.0001312	0.00033344	9.1023e-05	9.2655e-05	0.00023731	0.00030063	9.6636e-05	0
8.99556	0.0003292	0.00024143	0.00018594	0.00016577	0.0002416	0.00024613	0.00027087	3.7753e-05	0.0001344	5.6908e-05	0.00016659	0.00012342	0.00010667	5.1259e-05	0
9.99506	0.00021021	0.00018433	0.00012393	0.00026655	0.0002061	0.00011261	0.00012089	6.3827e-05	0.0001099	0.0001535	1.1592e-05	0.00021355	7.7458e-05	8.2174e-05	0
10.9946	9.2436e-05	0.00046985	0.00018402	0.00012797	0.0002565	0.00010445	5.7308e-05	0.00010046	0.00012143	0.00015285	0.00014152	0.00016627	0.00013861	5.1173e-05	0
11.9941	0.00018273	0.00042457	8.76e-05	0.00017926	2.5564e-05	0.00010364	0.00014497	9.7429e-05	9.3559e-05	0.00013144	1.3874e-05	7.1407e-05	0.00017558	5.2734e-05	0
12.9936	5.2383e-05	0.0001452	7.3826e-05	0.00011467	9.6794e-05	1.4632e-05	0.00010769	7.6059e-05	0.00010683	0.0001921	4.0122e-05	8.5228e-05	0.00019438	0.00010048	0
13.9931	0.00012488	0.00013102	8.4353e-05	0.00010426	0.00014517	0.00012085	9.5856e-05	4.8293e-05	3.3061e-05	9.7743e-05	4.5471e-05	0.00012701	5.8359e-05	7.7593e-05	0
14.9926	3.8833e-05	0.00013379	6.17e-05	4.1036e-05	4.8785e-05	5.0993e-05	6.2996e-05	3.0329e-05	7.4727e-05	6.3793e-05	6.3812e-05	0.00011957	1.6443e-05	6.0739e-05	0
15.9921	0.00011557	7.8825e-05	5.1822e-05	0.00015091	0.0001633	1.9611e-05	2.3489e-05	1.8596e-05	3.5118e-05	4.8659e-05	2.4709e-05	1.122e-05	4.4828e-05	1.7111e-05	0
16.9916	3.7815e-05	9.0318e-05	4.1325e-05	0.00010666	0.00010152	6.4697e-05	4.6918e-05	3.3386e-05	2.7342e-05	0.00013536	5.1991e-05	2.0083e-05	7.6963e-05	3.4577e-05	0
17.9911	4.9653e-05	8.8695e-05	5.9822e-05	6.104e-05	6.7845e-05	5.7503e-06	3.0756e-05	2.8017e-05	2.2327e-05	0.00014181	5.1837e-05	7.0726e-05	9.1479e-05	1.3833e-05	0
18.9906	9.3363e-05	0.00020393	7.8279e-05	8.5426e-06	2.5108e-05	7.4256e-05	4.453e-05	2.6982e-05	1.6891e-05	0.00012551	5.0355e-05	3.6363e-05	4.8611e-05	2.3578e-05	0
19.9901	1.8608e-05	4.281e-05	1.2812e-05	6.5307e-05	6.0061e-05	2.5806e-05	9.4965e-06	1.6337e-05	1.5513e-05	3.8218e-05	2.9289e-05	2.3098e-05	7.712e-05	5.8986e-06	0
20.9896	5.6807e-05	6.1793e-05	2.5999e-05	5.1647e-05	6.2069e-05	1.2799e-05	4.5789e-05	2.8841e-05	5.2994e-05	5.4805e-05	2.4604e-05	2.7928e-05	1.6262e-05	4.1998e-05	0
21.9891	7.4522e-05	0.0001186	3.4951e-05	6.5651e-05	2.1092e-05	4.2755e-05	3.3241e-05	3.2715e-05	1.5249e-05	8.9017e-05	2.5246e-05	1.5335e-05	1.0708e-05	1.6449e-05	0
22.9886	3.8702e-05	5.5364e-05	3.5759e-05	1.5122e-05	6.5662e-05	2.4582e-05	5.6026e-05	2.1127e-05	2.6176e-05	6.8863e-06	3.4577e-05	4.4284e-05	0.00012893	3.9367e-05	0
23.9882	3.4284e-05	6.2022e-05	2.3561e-05	4.3402e-05	4.882e-05	1.2724e-05	6.6068e-05	1.4465e-05	2.7109e-05	1.8078e-05	1.1605e-05	2.5705e-05	1.7848e-05	1.024e-05	0
24.9877	5.2332e-05	8.0334e-05	1.1203e-05	2.7633e-05	5.9608e-05	7.7008e-06	2.9692e-06	1.0251e-05	3.4236e-05	2.2048e-05	5.5343e-06	1.6399e-05	4.7364e-05	3.356e-05	0
25.9872	3.0928e-05	1.6999e-05	5.4475e-05	4.891e-05	4.5609e-05	2.6682e-05	1.578e-05	2.3539e-05	5.8606e-05	5.8443e-05	6.9221e-06	1.018e-05	6.7694e-05	1.1294e-05	0
26.9867	1.8449e-05	5.6566e-05	2.2066e-05	4.3774e-05	3.9851e-05	5.4376e-05	2.8458e-05	3.1278e-05	2.4704e-05	3.8723e-05	2.5505e-05	2.9857e-05	1.9895e-05	2.1199e-05	0
27.9862	2.6906e-05	2.8233e-05	1.7784e-05	3.4405e-05	4.5374e-05	2.6872e-05	6.9853e-06	6.4546e-06	4.4459e-05	4.7633e-05	2.8546e-05	4.0501e-05	7.457e-05	4.2876e-05	0
28.9857	6.7955e-05	4.9594e-05	1.5421e-05	5.0827e-05	4.3788e-05	1.9109e-05	3.0744e-05	5.6933e-05	2.6563e-05	3.2303e-05	2.5194e-05	3.3921e-05	3.3278e-05	1.4989e-05	0
29.9852	2.5126e-05	7.6691e-05	5.3329e-05	2.006e-05	3.8998e-05	1.7352e-05	3.7741e-05	5.567e-06	1.7718e-05	2.9861e-05	2.1591e-05	1.3579e-05	9.6314e-06	2.2782e-05	0
30.9847	2.9601e-05	5.6705e-05	3.174e-05	1.1329e-05	4.9065e-05	3.0529e-05	3.4632e-05	2.6101e-05	2.4473e-05	8.6404e-06	3.9645e-05	2.2558e-05	1.4892e-05	2.9518e-05	0
31.9842	3.1541e-05	1.2265e-05	5.0434e-05	1.7494e-05	1.6003e-05	5.9702e-05	2.8973e-05	2.7845e-05	2.925e-05	2.3278e-05	2.4713e-05	2.9046e-05	5.0805e-05	3.137e-05	0
32.9837	1.9374e-06	1.7372e-05	2.7675e-05	5.0697e-05	3.3397e-05	2.4343e-05	1.5831e-05	1.3344e-05	1.5854e-05	1.3875e-05	1.5572e-05	1.4577e-05	4.0848e-05	1.9859e-05	0
33.9832	4.1629e-05	4.9975e-05	4.6216e-05	2.2429e-05	1.5745e-05	4.8285e-05	2.3561e-05	2.3263e-05	4.0144e-05	3.2458e-05	6.5958e-06	1.1359e-05	3.0594e-05	2.3579e-05	0		signal-to-noise ratio
34.9827	2.9173e-05	4.8239e-05	3.0997e-05	4.4863e-05	2.5483e-05	1.9925e-05	4.4245e-05	1.0687e-05	1.2992e-05	3.3288e-05	1.4509e-05	2.3311e-05	5.528e-05	1.1173e-05	0		FF	70	60	50	40	30	20	10	AN10	AN20	AN30	AN40	AN50	AN60
35.9822	2.5669e-05	3.7395e-05	2.9988e-05	3.5966e-05	3.6384e-05	5.1181e-05	1.6502e-05	1.1446e-05	5.5838e-05	1.493e-05	3.6832e-05	8.0074e-05	3.6774e-05	1.4709e-05	0		7.43698	4.16482	3.85292	5.94289	7.72613	4.29407	2.07516	0	4.7944	8.57301	4.26291	2.13685	9.34359	2.84591
36.9817	9.2222e-06	3.9942e-05	3.0118e-05	5.4069e-05	8.3558e-05	1.2596e-05	1.5263e-05	9.4893e-06	2.3089e-05	3.9513e-05	3.2734e-05	2.7416e-05	1.6873e-05	2.1372e-05	0
37.9812	3.026e-05	1.3464e-05	7.1768e-05	2.4351e-05	2.6656e-05	3.7764e-05	2.4347e-05	1.9159e-05	1.1763e-05	2.5348e-05	4.251e-05	2.5195e-05	2.3462e-05	2.381e-05	0		Red	second try	Jacob_Mellina_20130521_1050_M48
38.9807	4.9887e-05	4.7677e-05	4.3807e-05	1.593e-05	1.5363e-06	3.3474e-05	2.2886e-05	2.6001e-05	3.4099e-05	1.341e-05	4.425e-05	3.5771e-05	3.0458e-05	2.7274e-05	0		Green	third try	(Jacob_Mellina_20130522_1225_M48_3.csv)
39.9802	1.3157e-05	3.4849e-05	8.0686e-05	5.4135e-05	2.5883e-05	3.1626e-05	1.9278e-05	1.1603e-05	2.6046e-05	1.5221e-05	1.505e-05	1.8701e-05	3.2238e-05	3.0305e-05	0		Orange	sixth try	Jacob_Mellina_20130523_1314_M48_6
40.9798	8.0241e-06	5.6315e-05	6.2442e-05	4.4656e-05	3.1791e-05	5.9128e-06	3.8934e-05	3.0384e-05	1.1588e-05	3.5195e-05	3.0995e-05	3.7502e-05	1.0194e-05	2.6336e-05	0
41.9793	3.7504e-05	2.1212e-05	3.4469e-05	2.3245e-05	2.6684e-05	2.7137e-05	1.4061e-05	1.0478e-05	1.7193e-05	2.0072e-05	2.6705e-05	3.36e-05	3.5369e-05	3.639e-05	0
42.9788	4.1797e-05	1.7397e-05	1.2858e-05	4.2731e-05	3.8003e-05	8.3614e-06	2.4054e-05	1.8793e-05	3.463e-05	3.3385e-05	8.7262e-06	2.0389e-05	7.5721e-06	2.3947e-05	0
43.9783	5.2195e-05	4.7305e-05	2.7274e-05	3.4695e-05	9.702e-06	3.0123e-05	2.7336e-05	2.3392e-05	1.353e-05	1.6335e-05	3.9245e-05	5.0114e-05	3.038e-05	3.6609e-05	0
44.9778	3.3099e-05	1.4466e-05	3.4402e-05	4.8076e-05	2.2703e-05	3.1863e-05	2.1066e-05	9.0305e-06	1.1738e-05	3.9962e-05	3.8515e-05	3.7391e-05	1.1331e-05	2.5492e-05	0
45.9773	2.6424e-05	2.7282e-05	1.7919e-05	6.35e-05	2.4505e-05	1.7052e-05	3.7061e-05	2.2737e-05	1.8785e-05	1.637e-05	5.4249e-06	1.1311e-05	2.6583e-05	9.4119e-06	0
46.9768	5.8646e-05	4.2481e-05	3.8205e-05	2.5257e-05	3.2865e-05	2.9071e-05	1.1164e-05	5.7525e-06	4.9374e-05	2.4219e-05	3.9938e-05	7.424e-05	4.794e-06	2.782e-05	0
47.9763	0.00042602	0.0002497	0.00018887	0.00024247	0.00015488	0.00012336	4.6053e-05		0.00019693	0.00015506	0.00015478	0.00015991	9.5669e-05	5.9417e-05	0
48.9758	5.5922e-05	7.7428e-05	5.9835e-05	5.6343e-05	7.2275e-06	2.8385e-05	3.3221e-05	2.694e-05	3.2776e-05	1.1955e-05	3.2679e-05	7.5429e-05	1.5684e-05	1.3936e-05	0
49.9753	3.6818e-06	3.7147e-06	2.1997e-05	3.5344e-05	1.656e-05	2.8382e-05	1.2715e-05	4.0964e-05	2.4005e-05	4.2421e-05	1.7773e-06	2.8834e-05	3.9983e-05	1.2725e-05	0
50.9748	2.6148e-05	3.3207e-05	5.0043e-05	7.0168e-06	1.1695e-05	1.7692e-05	2.4193e-05	2.2413e-05	1.3587e-05	2.6602e-05	2.4152e-05	3.0035e-05	3.4587e-05	2.5027e-05	0
51.9743	7.5739e-06	1.6343e-05	2.3008e-05	2.5559e-05	5.4181e-05	2.3095e-05	2.0966e-05	1.473e-05	2.6848e-05	2.9722e-05	3.4082e-05	2.1812e-05	7.1755e-05	2.1193e-05	0
52.9738	2.5662e-05	4.4051e-05	1.1949e-05	3.209e-05	2.3059e-05	2.9224e-06	1.1292e-05	4.172e-06	3.9385e-05	1.6118e-05	8.8108e-06	3.1028e-05	2.3504e-05	6.3298e-06	0
53.9733	1.2664e-05	1.2331e-05	7.2761e-06	3.2579e-05	2.0825e-05	5.5318e-05	4.1559e-06	1.433e-05	2.5192e-05	3.7045e-05	1.6429e-05	4.0087e-05	4.8801e-05	2.2995e-05	0
54.9728	8.7252e-06	1.3541e-05	2.1678e-05	9.2363e-06	2.4613e-05	1.7854e-05	2.6399e-05	3.2148e-05	7.1357e-06	1.9582e-05	2.6716e-05	1.8636e-05	2.7519e-05	3.3819e-05	0
55.9723	3.0593e-05	3.3763e-05	3.6046e-05	1.6633e-05	3.7154e-05	1.8589e-05	5.6696e-06	7.704e-06	1.4055e-05	1.7176e-05	1.7047e-05	2.135e-05	3.5323e-05	1.2946e-05	0
56.9719	3.3195e-05	1.3173e-05	8.4251e-06	8.3119e-06	3.3124e-05	1.9511e-05	2.0129e-05	4.4694e-05	1.5376e-05	1.1968e-05	7.0228e-06	1.7854e-05	5.0245e-05	1.038e-05	0
57.9714	2.492e-05	6.0081e-05	4.9814e-05	1.8558e-05	2.6092e-05	3.6221e-05	2.068e-05	1.2005e-05	3.46e-05	3.6899e-05	4.5795e-05	1.6782e-05	1.4474e-05	1.6821e-05	0
58.9709	5.8584e-05	3.5949e-05	3.7555e-05	6.7316e-05	3.6824e-05	5.8234e-06	1.7038e-05	1.4782e-05	2.3634e-05	4.1361e-05	1.7448e-05	3.0771e-06	2.2729e-05	2.4142e-05	0
59.9704	9.1035e-06	4.2716e-05	2.2588e-05	3.5815e-05	6.1175e-05	3.3768e-05	9.9445e-05	3.5516e-05	3.5557e-05	3.7147e-05	2.1748e-05	4.2219e-05	1.5574e-05	2.3218e-05	0
60.9699	2.9864e-05	9.5794e-06	4.1767e-05	1.5288e-05	2.6424e-05	1.0393e-05	9.6457e-06	1.2676e-05	3.4541e-05	1.3137e-05	1.717e-05	1.1281e-05	4.2044e-05	2.7836e-05	0
61.9694	9.6523e-06	3.6875e-05	6.9329e-06	1.3665e-05	2.2071e-05	2.6698e-05	1.8988e-05	4.4956e-06	2.7398e-05	1.4776e-05	6.3749e-05	1.9718e-05	3.2319e-05	2.52e-05	0
62.9689	2.1957e-05	1.532e-05	5.1933e-05	4.8812e-06	3.0906e-06	6.0238e-06	1.5353e-05	1.6071e-05	2.4134e-06	2.9667e-05	7.5545e-07	2.1623e-05	3.9846e-05	2.9113e-05	0
63.9684	9.194e-06	1.5197e-05	2.5531e-05	2.2861e-05	2.1399e-05	1.9485e-05	2.149e-05	1.3002e-05	2.9434e-05	2.2764e-05	1.9864e-05	3.2214e-05	2.0132e-05	2.1458e-05	0
64.9679	3.1651e-05	3.3626e-05	2.7828e-05	1.3911e-05	3.5625e-05	5.3244e-05	3.3372e-05	1.7058e-05	1.3856e-05	1.5998e-05	3.9982e-05	9.8132e-06	7.5798e-06	2.108e-05	0
65.9674	4.1332e-05	2.8898e-05	5.5551e-05	4.1786e-05	7.1912e-05	2.8921e-05	7.9206e-06	1.8875e-05	3.1853e-05	1.1141e-05	1.3303e-05	1.9564e-05	1.9312e-05	5.3287e-06	0
66.9669	2.0173e-05	3.17e-05	4.9834e-05	3.1103e-05	2.7872e-05	3.137e-05	1.6965e-05	2.0826e-05	6.3107e-06	2.217e-06	2.5976e-05	1.4103e-05	2.2673e-05	1.5734e-05	0
67.9664	2.0604e-05	3.4706e-05	2.2971e-05	1.9416e-05	6.6261e-05	5.5449e-05	2.3998e-05	1.6281e-05	1.1791e-05	3.8776e-05	2.6644e-05	3.553e-06	1.3272e-05	7.2516e-06	0
68.9659	2.2779e-05	3.8202e-05	1.3292e-05	3.9536e-05	1.2637e-05	2.3435e-05	2.5137e-05	1.263e-06	1.9942e-05	4.7739e-05	1.5326e-05	9.2915e-06	2.3995e-05	2.8565e-05	0
69.9654	5.0837e-05	1.642e-05	3.0043e-05	8.9724e-06	6.8289e-05	1.1536e-05	2.1249e-05	8.7423e-06	5.3861e-05	2.619e-05	1.4409e-05	1.3878e-05	1.5613e-05	1.0891e-05	0
70.9649	3.3471e-05	2.7376e-05	7.1368e-05	4.4843e-05	3.2617e-05	2.2482e-05	5.0697e-05	1.9406e-06	2.0303e-05	1.6578e-05	2.5392e-05	2.1454e-05	1.3053e-06	3.9409e-06	0
71.9644	2.5787e-05	4.656e-05	8.5917e-06	2.5164e-05	3.6053e-05	2.9137e-05	2.749e-05	1.4305e-05	1.4947e-05	2.3418e-05	3.3355e-05	2.5185e-05	1.2798e-05	1.4257e-05	0
72.964	2.8798e-05	9.2775e-06	4.9623e-05	7.9884e-06	2.9654e-05	2.4558e-05	2.4039e-05	1.9456e-05	3.0003e-05	3.0892e-05	4.0792e-05	1.0019e-05	2.392e-05	2.708e-05	0
73.9635	1.4884e-05	2.9219e-05	4.5008e-05	2.059e-05	4.5481e-05	3.9254e-05	3.1456e-05	2.0549e-05	1.7362e-05	1.4058e-05	1.9744e-05	1.4788e-05	1.3636e-05	6.7871e-06	0
74.963	2.3613e-06	3.413e-05	5.7942e-06	2.9169e-05	4.7612e-05	1.2211e-05	1.4956e-05	2.6876e-05	1.3242e-05	2.7136e-05	7.9554e-06	3.955e-05	1.5712e-05	4.4732e-06	0
75.9625	1.6541e-05	4.5482e-06	4.982e-05	2.034e-05	1.9167e-05	9.9868e-06	8.2043e-06	1.0139e-05	2.6695e-05	1.9787e-05	2.8385e-05	2.5988e-05	1.7885e-05	2.2204e-05	0
76.962	1.8758e-05	2.2751e-05	3.446e-05	4.5945e-05	2.5242e-05	5.9496e-06	1.1048e-05	3.1948e-05	1.6789e-05	1.3908e-05	5.1291e-05	9.0976e-06	1.7619e-05	2.7046e-05	0
77.9615	2.1007e-05	3.1613e-05	1.5622e-05	1.6661e-05	1.4018e-05	4.4628e-05	7.2683e-06	7.6444e-06	2.6721e-05	3.5929e-05	1.544e-05	1.8526e-05	1.8806e-05	1.4617e-05	0
78.961	2.8262e-05	1.3658e-05	2.8383e-05	1.7125e-05	4.632e-05	2.644e-05	1.0606e-05	1.7808e-05	1.2755e-05	2.5213e-05	1.6225e-05	5.0634e-05	2.7625e-05	5.3216e-06	0
79.9605	3.2093e-06	4.4461e-05	4.4687e-05	1.1777e-05	1.0935e-05	1.7252e-05	2.4488e-05	1.7601e-05	2.7813e-05	1.1264e-05	2.1389e-05	2.603e-05	3.0934e-05	2.017e-05	0
80.96	2.6303e-05	1.5535e-05	3.085e-05	2.3056e-05	5.2312e-05	1.7175e-05	3.1026e-05	8.3871e-06	3.0695e-05	4.9266e-06	4.108e-06	2.689e-05	5.2816e-06	2.8701e-05	0
81.9595	2.3267e-05	9.4129e-06	4.9573e-05	4.7901e-05	1.3062e-05	2.6539e-05	2.6439e-05	1.5439e-05	1.7151e-05	1.4134e-05	4.7133e-05	9.8536e-06	3.5138e-05	2.3529e-06	0
82.959	1.7174e-05	4.3207e-05	2.907e-05	3.6445e-05	1.7399e-05	1.7665e-05	2.0352e-05	5.552e-06	4.7145e-05	2.7724e-05	3.8702e-05	2.6129e-05	1.7949e-05	1.8818e-05	0
83.9585	2.4694e-05	2.8975e-05	7.8423e-06	2.1797e-05	3.5091e-05	2.7745e-05	7.3685e-06	1.4198e-05	1.8613e-05	1.2311e-05	2.3308e-05	1.2361e-05	2.229e-05	1.5847e-05	0
84.958	1.6206e-05	1.9222e-05	2.2008e-05	1.1867e-05	3.0605e-05	1.1262e-05	3.4881e-05	6.6341e-06	3.6391e-05	2.6527e-05	3.2685e-05	2.6793e-05	2.1799e-05	2.4629e-05	0
85.9575	8.6219e-06	6.655e-06	1.0513e-05	3.2713e-05	3.1006e-05	2.2396e-05	1.6633e-05	3.0169e-05	1.9626e-05	8.0756e-06	2.0635e-05	3.0267e-05	1.0497e-05	2.0406e-05	0
86.957	4.4386e-05	4.7677e-05	2.9075e-05	2.4135e-05	3.3345e-06	2.8326e-05	1.6584e-05	1.5208e-05	3.2696e-06	1.2753e-05	2.0054e-05	1.4335e-05	8.6923e-06	3.4621e-06	0
87.9565	1.9188e-05	1.5187e-05	3.2449e-05	3.3607e-05	4.504e-05	8.8301e-06	9.5635e-06	2.1336e-05	1.0639e-05	3.9306e-05	2.0752e-05	1.1834e-05	1.301e-05	1.6747e-05	0
88.9561	1.6645e-05	4.5749e-05	2.2709e-05	1.2437e-05	2.4891e-05	1.9638e-05	1.0015e-05	2.173e-05	2.275e-05	1.8391e-05	5.0458e-05	1.4601e-05	3.01e-05	3.2171e-05	0
89.9556	7.2571e-06	2.8991e-05	3.6421e-05	1.965e-05	1.7207e-05	1.7179e-05	7.9527e-06	1.1592e-05	1.4529e-05	2.167e-05	3.2481e-05	4.1792e-06	1.8201e-05	2.5995e-05	0
90.9551	1.3656e-05	5.5736e-06	2.5149e-05	3.7784e-05	1.7763e-05	2.5659e-05	1.8729e-05	1.5812e-05	2.8817e-05	3.717e-05	8.3195e-06	2.2257e-05	1.5591e-05	5.8818e-06	0
91.9546	3.4001e-05	4.263e-05	1.2319e-05	2.2154e-05	1.2308e-05	2.6712e-05	7.4255e-06	1.8686e-05	6.311e-06	1.5251e-05	1.1758e-05	3.0887e-05	1.5342e-05	2.4577e-05	0
92.9541	2.7757e-05	4.5629e-05	1.6603e-05	1.7173e-05	1.4113e-05	6.694e-06	5.1165e-05	2.8995e-06	1.4374e-05	1.0609e-05	1.2125e-05	3.8717e-05	2.0624e-05	1.4053e-05	0
93.9536	1.1779e-05	1.8401e-05	1.2518e-05	4.5755e-05	2.9895e-05	1.2137e-06	1.6942e-05	8.4081e-06	2.8441e-05	2.0011e-05	3.5905e-05	1.6945e-05	2.3241e-05	8.4221e-06	0
94.9531	3.6598e-05	1.7062e-05	1.1495e-05	4.2675e-05	1.6438e-05	2.3927e-05	2.3342e-05	1.2408e-05	2.1211e-05	3.4508e-05	6.8119e-06	3.4746e-05	5.0296e-06	1.2451e-05	0
95.9526	6.9466e-05	2.996e-05	2.8084e-05	2.4426e-05	4.3863e-05	6.3521e-05	3.7154e-05	1.5947e-05	4.1604e-05	2.5405e-05	2.6813e-05	3.9003e-05	9.9268e-06	1.1791e-05	0
96.9521	9.8374e-06	3.5983e-05	5.4281e-05	4.3254e-05	1.878e-05	1.2768e-05	1.0563e-05	1.3843e-05	1.0829e-05	7.2334e-07	2.5207e-05	3.3767e-05	1.0137e-05	1.8442e-05	0
97.9516	2.2543e-05	2.2828e-05	1.078e-05	3.1619e-05	4.0759e-05	1.4151e-05	4.0734e-05	1.1902e-05	1.3357e-05	2.5006e-05	2.5643e-05	1.4948e-05	2.4927e-05	1.5356e-05	0
98.9511	3.2184e-05	3.4612e-05	1.6189e-05	2.5455e-05	2.8813e-05	1.8191e-06	1.5661e-05	1.1087e-05	1.3272e-06	9.4114e-06	3.2591e-05	2.5974e-05	2.2091e-05	8.363e-06	0
99.9506	3.1864e-05	2.0696e-05	1.1058e-05	3.0532e-05	1.548e-05	2.2323e-05	2.2264e-05	1.5592e-05	1.5735e-05	1.5925e-05	5.4096e-05	1.3722e-05	5.4332e-06	1.6081e-05	0
100.95	2.0788e-05	1.926e-05	5.1064e-05	2.8288e-05	2.2369e-05	1.9167e-05	2.104e-05	1.2217e-05	1.3296e-05	3.4161e-05	1.7099e-05	1.9164e-05	3.6604e-05	3.1231e-05	0
101.95	2.3648e-05	2.3294e-05	2.9639e-05	1.5167e-05	1.3077e-05	5.1105e-06	2.6952e-05	2.2024e-05	2.8347e-05	7.6442e-06	3.3381e-05	2.5491e-05	1.7175e-05	2.1142e-05	0
102.949	2.3508e-05	8.4631e-06	3.5511e-05	3.1189e-05	8.0458e-06	9.346e-06	1.9155e-05	1.2489e-05	2.7339e-05	1.6159e-05	5.0483e-05	7.7281e-06	1.2367e-05	1.615e-05	0
103.949	2.7643e-05	4.2519e-05	1.7201e-05	2.9275e-05	2.7241e-05	8.1871e-06	9.7823e-06	8.6521e-06	1.7222e-05	1.2473e-05	3.756e-05	1.7017e-05	1.8177e-05	3.3841e-05	0
104.948	3.2534e-05	1.7734e-05	3.1205e-05	5.8175e-05	7.5309e-06	6.624e-06	1.5394e-05	1.7572e-05	1.8977e-05	3.7673e-05	2.8999e-05	1.8345e-05	1.6258e-05	1.229e-05	0
105.948	3.037e-05	1.3218e-05	3.5091e-05	1.5148e-05	2.4068e-05	1.4819e-05	8.6444e-06	1.5216e-05	4.9913e-06	1.2445e-05	1.3209e-05	1.0753e-05	9.4521e-06	1.2892e-05	0
106.947	2.3839e-05	8.5687e-06	2.4436e-05	5.7139e-06	2.3322e-05	1.6898e-05	2.5907e-05	9.8525e-06	2.6457e-05	8.3741e-06	4.7198e-05	3.089e-05	8.2612e-06	1.5753e-05	0
107.947	2.681e-05	1.3677e-05	2.8199e-05	1.4773e-05	3.0518e-05	2.1536e-05	1.4483e-05	3.3523e-06	5.1018e-06	1.0909e-05	5.8284e-05	1.6372e-05	5.8881e-06	5.8093e-06	0
108.946	2.0693e-05	3.1783e-05	4.9987e-05	1.365e-05	3.1973e-05	2.5498e-05	1.3627e-05	9.4706e-06	1.1166e-05	1.7592e-05	2.0411e-05	9.516e-06	8.9368e-06	2.4611e-05	0
109.946	2.0382e-05	2.942e-05	3.6386e-05	1.872e-05	1.4388e-05	2.733e-05	2.6746e-05	1.8771e-05	2.4889e-05	1.7399e-05	1.0324e-05	2.2445e-05	1.264e-05	2.7189e-06	0
110.945	8.7448e-05	1.8132e-05	6.0418e-05	4.3097e-05	7.6997e-05	3.1046e-05	1.1721e-05	7.9179e-06	1.2022e-05	2.1315e-05	3.2579e-05	7.6724e-06	1.8282e-05	6.9365e-06	0
111.945	2.5442e-05	2.4762e-05	3.0476e-05	2.4897e-05	2.2487e-06	2.7638e-06	1.9123e-05	9.5803e-06	9.8032e-06	1.6779e-05	2.1863e-05	1.6996e-05	1.2326e-05	1.2557e-05	0
112.944	2.0217e-05	1.1213e-05	3.0739e-05	2.208e-05	1.8433e-05	3.1582e-05	4.0675e-05	1.4785e-05	2.336e-05	1.7879e-05	8.415e-06	1.5251e-05	1.428e-05	1.5402e-05	0
113.944	1.4482e-05	1.2372e-05	9.0402e-06	5.8635e-06	1.5276e-05	1.3501e-05	1.0352e-05	7.6047e-06	2.4049e-05	1.4387e-05	1.0426e-05	2.3341e-05	1.3004e-05	1.1356e-05	0
114.943	1.6898e-05	5.1314e-06	4.0043e-05	3.1702e-05	1.2989e-05	1.4174e-05	1.2387e-05	5.4618e-06	2.1111e-05	1.5041e-05	2.2368e-05	2.1157e-05	1.1686e-05	9.7473e-07	0
115.943	6.0204e-06	2.8951e-05	3.8663e-05	9.9424e-06	1.8724e-05	7.4122e-06	2.4564e-05	1.1066e-05	3.7707e-05	3.6648e-05	1.3897e-05	6.4203e-06	2.105e-05	6.9412e-06	0
116.942	1.4721e-05	1.8359e-05	1.8668e-05	4.7523e-06	3.3637e-05	2.9689e-05	2.5196e-05	3.9751e-06	1.1845e-05	4.6803e-06	2.1007e-05	5.1453e-06	6.5974e-06	1.1033e-05	0
117.942	2.8654e-05	2.7065e-05	2.3329e-05	2.1982e-05	2.0518e-05	1.6134e-05	3.1564e-05	7.6139e-06	1.3102e-05	1.6445e-05	2.3876e-05	1.6118e-05	1.278e-05	3.0004e-05	0
118.941	1.7796e-05	2.7606e-06	2.5545e-05	2.5166e-05	2.066e-05	1.1242e-05	1.3983e-05	6.4516e-06	2.6613e-05	2.1423e-05	1.7953e-05	1.5808e-05	1.5619e-05	2.0514e-05	0
119.941	3.5393e-06	2.1216e-05	2.3694e-05	2.3253e-05	2.0741e-05	6.9481e-06	8.7801e-06	7.639e-06	2.7727e-05	1.2561e-05	1.855e-05	1.3522e-05	1.3658e-05	1.6555e-05	0
120.94	1.2199e-05	1.3681e-05	4.1425e-05	2.1705e-05	1.9402e-05	1.6917e-05	7.5504e-06	9.2614e-06	2.6606e-05	1.9564e-05	2.6983e-05	1.1961e-05	1.8237e-06	9.14e-06	0
121.94	7.5638e-06	2.3106e-05	3.3099e-05	1.9378e-05	1.6404e-05	7.7875e-06	4.0941e-06	7.2622e-06	2.2847e-05	8.1596e-06	5.4703e-06	2.3808e-05	1.125e-05	1.4059e-05	0
122.939	8.1553e-06	6.9591e-06	4.3922e-05	6.8943e-06	4.8027e-06	3.6402e-06	2.8247e-05	4.0475e-06	1.6288e-05	9.4078e-06	1.6721e-05	5.9205e-06	1.0591e-05	8.3041e-06	0
123.939	6.2644e-06	2.2173e-05	4.0978e-05	1.4603e-05	2.5423e-05	2.2143e-05	7.1302e-06	1.9758e-05	1.6655e-05	6.1735e-06	1.2468e-05	1.6579e-05	6.5311e-06	1.1599e-05	0
124.938	1.3702e-05	2.5376e-05	4.4283e-05	2.4729e-05	1.5286e-05	1.2742e-06	1.5926e-05	1.3121e-05	7.5052e-06	9.0006e-06	9.5551e-06	6.5214e-06	1.5033e-05	8.9038e-06	0
125.938	3.0482e-05	5.5874e-06	1.1237e-05	3.0786e-06	2.3187e-05	1.3776e-05	3.2752e-05	8.5372e-06	5.5329e-06	1.0141e-05	1.7774e-05	4.1937e-06	3.631e-06	1.788e-05	0
126.937	1.3608e-05	1.4571e-05	4.7287e-05	1.621e-05	1.913e-05	1.0784e-05	1.8913e-05	2.9239e-06	6.4613e-06	1.5788e-05	6.6148e-06	6.947e-06	7.4428e-06	2.5358e-05	0
127.937	1.6387e-05	1.7954e-05	5.1275e-05	2.8038e-05	1.849e-05	4.5956e-06	6.3414e-06	1.4484e-05	7.0775e-06	6.1721e-06	1.162e-05	1.0839e-05	2.8862e-05	3.0607e-05	0
128.936	2.202e-05	3.243e-05	2.285e-05	1.8212e-05	1.4649e-05	9.5787e-06	9.4117e-06	6.8255e-06	1.128e-05	1.2213e-05	7.3866e-06	1.7244e-05	2.5016e-05	1.4356e-05	0
129.936	2.2175e-05	2.6026e-05	1.9598e-05	2.0466e-05	1.1628e-05	3.9858e-05	1.5602e-05	6.294e-06	1.6858e-05	3.7164e-06	5.2893e-06	2.0368e-05	1.3733e-05	1.4053e-06	0
130.935	1.3888e-05	1.4612e-05	1.6807e-05	1.4489e-05	1.594e-05	1.665e-05	2.7211e-05	3.134e-06	1.5536e-05	5.0231e-06	1.4963e-05	1.4228e-05	2.3664e-05	5.0485e-06	0
131.935	1.6907e-05	1.1043e-05	5.0851e-06	1.131e-05	1.1355e-05	2.1642e-06	2.2606e-05	6.2534e-06	1.1957e-05	8.4838e-06	1.8969e-05	1.5574e-05	1.1854e-05	1.0816e-05	0
132.934	1.4523e-05	1.0036e-05	1.8596e-05	3.8549e-06	3.2913e-05	7.6952e-06	3.0783e-06	8.5199e-06	4.6935e-06	1.9889e-05	2.0231e-05	1.7744e-05	2.5604e-05	1.1581e-05	0
133.934	4.2287e-06	5.0986e-06	3.1916e-05	2.6704e-05	1.5754e-05	1.5721e-05	6.2294e-06	1.0354e-05	2.1901e-05	1.9823e-05	1.4341e-05	1.2991e-05	8.5182e-06	2.244e-05	0
134.933	1.3337e-05	3.44e-06	1.319e-05	2.6927e-05	1.0098e-05	2.248e-05	1.94e-05	5.4872e-06	1.549e-05	8.1681e-06	1.8408e-05	1.25e-05	1.0182e-05	2.1126e-05	0
135.933	1.4007e-05	1.6789e-05	3.1419e-05	1.3595e-05	6.4093e-06	7.886e-06	2.2518e-05	1.4001e-06	5.2869e-06	1.6712e-05	1.9182e-05	5.4976e-06	1.489e-05	1.3806e-05	0
136.932	1.2419e-05	1.2297e-05	3.6801e-05	1.7264e-05	6.1103e-06	8.694e-06	6.0877e-06	1.2382e-05	2.7365e-05	3.3733e-06	1.4379e-05	9.5459e-06	6.6504e-07	6.6822e-06	0
137.932	2.0667e-06	1.4668e-05	3.9686e-05	2.9257e-05	1.0093e-05	9.2053e-06	3.7239e-05	7.5483e-06	6.7372e-06	5.0286e-06	1.5646e-05	4.944e-06	2.7987e-06	3.3135e-07	0
138.931	2.072e-05	1.8336e-05	2.9544e-05	1.331e-05	1.7701e-05	1.2695e-05	1.681e-05	5.2151e-06	4.9656e-06	6.5482e-06	2.9508e-05	1.4989e-05	8.2237e-06	9.3614e-06	0
139.931	1.2538e-05	1.6565e-05	7.038e-06	8.6018e-06	1.1597e-05	1.918e-05	3.4563e-05	8.9564e-06	2.4537e-05	1.0155e-05	5.578e-06	2.202e-05	8.8671e-06	1.516e-05	0
140.93	1.5583e-05	1.7985e-05	1.3068e-05	2.4478e-05	1.794e-05	5.9732e-06	1.8785e-05	1.3758e-05	1.3734e-05	5.8035e-06	2.5636e-05	8.6386e-06	8.2576e-06	1.0046e-05	0
141.93	5.6291e-06	3.3239e-05	1.8654e-05	7.8659e-06	2.6916e-05	1.2777e-05	9.0002e-06	3.7538e-06	2.1495e-05	1.1514e-06	5.6904e-06	1.3357e-05	1.9947e-05	1.989e-05	0
142.929	2.8987e-05	1.319e-05	3.048e-05	2.8236e-05	1.127e-05	9.4635e-06	5.7532e-06	4.8921e-06	1.1491e-06	1.0247e-05	5.7803e-06	5.3372e-06	1.3207e-05	6.263e-06	0
143.929	1.4599e-05	1.623e-05	4.1003e-05	1.2619e-05	4.5812e-06	1.1107e-05	9.5298e-06	5.8186e-06	1.6189e-05	6.5803e-06	2.1143e-05	8.7e-06	7.9179e-06	9.1281e-06	0
144.928	1.3596e-05	2.2118e-05	1.1081e-05	1.8064e-05	2.4161e-05	9.2876e-06	6.7303e-06	1.1258e-05	1.1553e-05	1.8217e-05	5.7652e-06	3.6906e-06	9.6633e-06	1.6898e-05	0
145.928	1.4273e-05	1.3287e-05	2.132e-05	2.9699e-05	5.5782e-06	2.003e-06	2.2899e-05	4.7533e-06	4.9834e-06	7.6608e-06	2.5354e-05	1.3794e-05	2.0776e-05	1.169e-05	0
146.927	1.1875e-05	1.8959e-05	2.0589e-05	1.0617e-05	1.2518e-05	1.806e-05	1.4025e-05	9.5381e-06	1.5051e-05	1.1544e-05	1.0764e-05	1.8285e-06	5.7133e-06	1.9979e-05	0
147.927	1.1399e-05	1.5754e-05	1.0549e-05	1.8337e-05	2.7975e-05	2.2105e-05	3.4354e-06	1.1993e-05	3.544e-06	6.3355e-06	1.2141e-05	1.407e-05	2.0039e-05	1.6375e-05	0
148.926	3.2037e-05	1.7613e-06	2.3715e-05	1.6044e-05	3.5432e-05	1.5777e-05	8.3566e-06	6.2039e-06	1.9293e-05	9.3485e-07	7.5521e-06	1.9722e-05	9.9974e-06	7.0858e-06	0
149.926	2.0949e-05	1.7661e-05	2.0494e-05	1.052e-05	2.2318e-06	1.1104e-05	1.6994e-05	2.8995e-06	9.3922e-06	1.6954e-06	3.0466e-05	1.635e-05	6.7061e-06	1.3689e-05	0
150.925	1.6974e-05	2.2168e-05	1.7815e-05	2.4254e-06	1.0045e-06	4.0794e-06	9.49e-06	2.5775e-06	1.017e-05	7.0666e-06	1.0837e-05	1.2614e-05	4.7768e-06	8.7868e-06	0
151.925	3.0788e-05	1.0168e-05	2.7477e-05	1.7572e-05	6.4922e-06	1.6403e-05	5.1101e-06	5.2876e-06	4.952e-06	5.0543e-06	8.2362e-06	1.5726e-06	1.1921e-05	7.7284e-06	0
152.924	2.5089e-06	8.8502e-06	1.0913e-05	2.3127e-05	4.119e-06	1.3508e-05	1.7011e-05	4.383e-06	1.0928e-05	5.6339e-06	8.9947e-06	9.1296e-06	9.7836e-06	7.9249e-06	0
153.924	7.3315e-06	7.4148e-06	1.5211e-05	1.2214e-05	2.1106e-06	4.1946e-06	7.1102e-06	2.692e-06	1.336e-05	3.8316e-06	6.3783e-06	1.1263e-05	1.6016e-05	1.2556e-05	0
154.923	1.9881e-05	6.4703e-06	2.522e-05	1.5615e-06	5.7869e-06	1.8745e-05	8.4815e-06	2.0885e-06	1.2277e-05	6.9839e-06	6.3876e-06	9.7693e-06	7.5747e-06	5.8839e-06	0
155.923	1.6512e-06	2.8615e-05	1.248e-05	9.1225e-06	8.2394e-06	1.3031e-05	9.6465e-06	3.175e-06	4.9732e-06	1.3526e-05	2.5728e-05	5.4507e-06	3.7056e-06	9.4363e-06	0
156.922	1.2456e-05	1.7852e-05	1.8021e-05	9.9861e-06	1.7308e-05	8.04e-06	2.5382e-05	5.7951e-06	9.2075e-06	4.6904e-06	1.0472e-05	1.1319e-05	1.128e-05	7.5924e-06	0
157.922	2.4501e-05	1.066e-05	8.1456e-06	1.8527e-05	1.701e-06	2.3449e-06	1.1516e-05	7.003e-06	8.9912e-06	1.2002e-05	2.5615e-05	1.1006e-05	1.3038e-05	4.8307e-06	0
158.921	1.134e-05	1.0384e-05	1.4765e-05	8.2352e-06	2.6215e-05	3.2345e-06	7.1635e-06	5.7299e-06	8.4852e-06	8.6638e-06	7.3527e-06	1.8358e-05	6.1087e-06	5.796e-06	0
159.921	2.6189e-05	9.4788e-06	2.1176e-05	1.6437e-05	2.3972e-05	4.0222e-06	1.2583e-05	7.7081e-06	1.5093e-05	7.8841e-06	1.8287e-05	1.7678e-05	2.0047e-05	8.2886e-06	0
160.921	2.2495e-05	4.5311e-06	6.118e-06	1.2614e-05	2.0832e-05	8.3749e-06	6.4906e-06	2.143e-06	5.0903e-06	6.1126e-06	2.0121e-05	3.8831e-06	1.82e-05	1.3721e-05	0
161.92	5.1614e-06	1.189e-05	1.9849e-05	1.8121e-05	1.5868e-05	1.0331e-05	1.1066e-05	6.825e-06	8.1116e-06	1.9123e-06	7.5639e-06	9.8606e-06	1.651e-05	1.6854e-05	0
162.92	6.7235e-06	3.9468e-06	2.3032e-05	8.4604e-06	9.6737e-06	1.4259e-05	1.0746e-05	6.779e-06	1.1804e-05	6.1284e-06	3.3948e-06	9.0382e-06	4.814e-06	9.4491e-06	0
163.919	2.5825e-06	1.2158e-05	5.1146e-06	7.8776e-06	7.3421e-06	1.2322e-05	1.2377e-05	4.3391e-06	1.0317e-05	9.5998e-06	1.5465e-05	1.7126e-05	8.5906e-06	9.3026e-06	0
164.919	2.2108e-05	2.1624e-06	1.7604e-05	1.4477e-05	6.72e-06	1.0173e-05	1.5956e-05	8.5772e-06	1.4534e-05	1.8066e-05	2.3135e-05	1.6559e-05	1.5279e-05	3.8495e-06	0
165.918	1.3288e-05	1.3658e-05	8.6258e-06	1.1802e-05	1.9414e-05	9.3824e-06	1.1983e-05	6.8224e-06	1.5226e-05	1.0116e-05	5.7176e-06	1.058e-05	1.6797e-06	1.1212e-05	0
166.918	1.6527e-05	1.0167e-05	1.3133e-05	1.1788e-05	1.0043e-05	1.5839e-05	1.5608e-05	5.001e-06	1.0654e-05	9.3156e-06	1.0743e-05	1.6463e-05	3.9342e-06	1.5576e-05	0
167.917	7.0476e-06	4.5379e-06	2.1026e-05	1.3198e-05	1.0277e-05	8.2738e-07	1.0066e-05	2.9977e-06	9.002e-06	7.1592e-06	1.7608e-05	2.0483e-05	4.5267e-06	1.3957e-05	0
168.917	9.3996e-06	1.6122e-05	1.3228e-05	2.7351e-06	1.5943e-05	1.0216e-05	4.5339e-06	7.4594e-06	1.3219e-05	1.2024e-05	1.155e-05	9.0831e-06	8.42e-06	5.7919e-06	0
169.916	2.2526e-05	3.2385e-05	9.043e-06	3.9965e-05	1.3086e-05	8.0836e-06	5.9727e-07	5.836e-06	1.3339e-05	1.0579e-05	1.8771e-05	9.6701e-06	1.7518e-05	4.7436e-06	0
170.916	2.7917e-06	1.3319e-05	5.2088e-06	1.103e-05	7.6912e-06	6.109e-06	3.5024e-06	6.1155e-06	1.3636e-05	2.1675e-05	4.9584e-06	8.382e-06	2.3874e-06	1.1429e-05	0
171.915	1.3287e-05	6.3611e-06	2.9468e-05	1.0471e-05	5.2897e-06	1.0652e-05	6.711e-06	1.3155e-05	1.3546e-05	1.7606e-05	2.215e-06	7.4672e-06	1.0221e-05	2.7752e-05	0
172.915	7.5251e-06	3.012e-06	7.5906e-06	8.0716e-06	1.2893e-05	3.6252e-06	1.0566e-05	7.121e-06	7.1543e-06	8.8366e-06	6.6087e-06	3.437e-06	9.1692e-06	1.0158e-05	0
173.914	3.1001e-06	1.7194e-05	1.8073e-05	1.1702e-05	1.1348e-05	4.2043e-06	6.6145e-06	1.2391e-06	1.1256e-05	4.046e-06	1.3014e-05	9.8695e-06	9.9198e-06	1.2675e-05	0
174.914	5.2465e-06	1.2281e-05	1.2801e-05	1.4111e-05	5.5384e-06	4.3223e-06	3.1885e-06	7.8738e-06	4.677e-06	1.1505e-05	9.9557e-06	3.4498e-06	5.5787e-06	4.4881e-06	0
175.913	1.4889e-05	2.1522e-05	2.5957e-05	2.0624e-05	1.5598e-05	5.4581e-06	9.5565e-06	1.1559e-05	1.7804e-05	9.9807e-06	6.5126e-06	4.4289e-06	5.961e-06	4.0358e-06	0
176.913	1.5005e-05	5.9888e-06	1.5906e-05	1.9027e-05	4.1757e-06	1.5878e-05	1.7906e-05	1.7331e-06	2.1128e-05	6.8428e-06	1.1025e-05	4.036e-06	5.642e-06	6.3072e-06	0
177.912	2.1512e-06	1.1096e-05	1.2263e-05	1.8204e-05	3.3891e-06	5.2186e-06	1.5949e-05	6.1275e-06	9.7609e-06	1.319e-05	1.0528e-05	1.2771e-05	7.1188e-07	4.5055e-06	0
178.912	1.1564e-05	1.6551e-05	2.415e-05	1.3357e-05	7.6895e-06	1.762e-05	1.665e-05	3.4178e-06	7.3928e-06	5.5982e-06	5.8719e-06	5.1298e-06	1.4545e-05	7.2217e-06	0
179.911	1.5568e-05	3.1706e-06	1.7257e-05	3.7747e-06	2.2464e-05	1.3603e-05	1.3673e-05	8.5269e-06	1.2927e-05	2.9146e-06	6.5171e-06	2.0102e-05	1.0988e-05	8.4267e-06	0
180.911	5.943e-06	1.6134e-05	1.5512e-05	4.9223e-06	8.9248e-06	5.5376e-06	4.333e-06	3.3882e-06	4.9121e-06	6.2589e-06	1.4428e-05	4.1643e-06	1.4674e-05	7.6751e-06	0
181.91	9.4626e-06	7.6383e-06	1.0891e-05	9.8874e-06	1.0113e-05	9.4199e-06	1.0656e-05	6.8618e-06	3.7066e-06	5.9368e-06	4.4485e-06	3.2928e-06	6.4963e-06	9.1467e-06	0
182.91	9.4143e-06	8.3882e-06	2.28e-05	1.3864e-05	1.6331e-05	3.552e-06	2.0396e-05	2.5994e-06	5.5622e-06	7.1106e-06	1.2572e-05	4.926e-06	8.924e-06	1.6199e-05	0
183.909	5.812e-06	4.7041e-06	2.6484e-05	5.9357e-06	1.0718e-05	5.7285e-06	4.2242e-06	6.4901e-06	1.1587e-05	7.6344e-06	8.507e-06	1.182e-05	4.2455e-06	8.2997e-06	0
184.909	1.8057e-05	3.3229e-06	3.5734e-06	2.0823e-05	1.1347e-05	1.9796e-06	4.6614e-06	6.0563e-06	2.0497e-06	1.0218e-05	1.2645e-05	1.9601e-05	7.9526e-06	6.5306e-06	0
185.908	9.9768e-06	7.5327e-06	1.5748e-05	1.1624e-05	1.9606e-06	1.2404e-05	9.775e-06	4.481e-06	7.734e-06	3.5583e-06	1.0205e-05	4.3164e-06	1.156e-06	9.3052e-06	0
186.908	1.0702e-05	3.2981e-06	1.0802e-05	1.7442e-06	1.5612e-05	4.4156e-06	2.9807e-06	5.857e-06	4.3077e-06	9.2465e-06	9.8552e-06	1.15e-05	1.0299e-05	6.0452e-06	0
187.907	3.3633e-06	1.4323e-05	2.1005e-05	6.1811e-06	1.7487e-05	6.5075e-06	1.0717e-05	3.658e-06	8.9929e-06	1.3567e-05	2.9559e-06	6.923e-06	9.1788e-06	4.5238e-06	0
188.907	7.5862e-06	6.7496e-06	1.4922e-05	2.3685e-05	5.4174e-06	1.2438e-05	4.8708e-06	7.6648e-06	1.5476e-05	7.3386e-06	6.6446e-06	2.0474e-06	1.1707e-05	1.0702e-05	0
189.906	1.033e-05	4.0153e-06	2.3237e-06	3.4441e-06	1.3183e-05	7.6985e-06	5.6923e-06	8.1558e-06	1.0742e-05	9.4288e-06	8.6636e-06	1.2418e-05	3.1057e-06	1.9548e-06	0
190.906	3.0675e-06	4.0243e-06	1.4326e-05	2.0204e-05	7.0851e-06	4.2819e-06	6.6284e-06	4.948e-06	2.1645e-05	6.0269e-06	4.1958e-06	1.198e-05	1.0365e-05	8.9847e-06	0
191.905	1.5591e-05	1.5157e-05	2.105e-05	2.6149e-05	1.0615e-05	7.0227e-06	8.2686e-06	4.0095e-06	4.4758e-06	9.0498e-06	6.4306e-06	1.2763e-05	1.3066e-05	1.7515e-06	0
192.905	2.8341e-06	6.0698e-06	1.2405e-05	2.0671e-05	1.8739e-05	9.1866e-06	5.93e-06	2.5089e-06	2.7855e-06	4.9827e-06	5.3893e-06	1.0082e-05	1.469e-05	4.8271e-06	0
193.904	8.5485e-06	1.8861e-05	5.7529e-06	1.9281e-05	9.6207e-06	1.2119e-05	3.877e-06	6.022e-06	4.4136e-06	4.4538e-06	5.6841e-06	7.8549e-06	7.0905e-06	1.0005e-05	0
194.904	1.2501e-05	7.358e-06	1.8114e-05	2.1835e-05	8.8951e-06	1.0145e-05	1.4202e-05	1.1754e-06	7.4306e-06	6.3733e-06	7.7642e-06	1.4206e-05	5.5472e-06	1.1143e-06	0
195.903	9.4423e-06	1.6381e-05	1.1125e-05	2.3967e-05	1.125e-05	9.0484e-07	1.3727e-06	1.1822e-06	4.7891e-06	8.8713e-06	3.573e-06	9.2223e-06	1.1272e-05	8.0742e-06	0
196.903	1.3613e-05	1.8358e-05	1.7881e-05	1.6056e-05	1.5258e-05	1.673e-05	1.079e-05	4.5621e-06	9.0027e-06	8.8186e-06	1.4373e-05	1.1171e-05	3.5226e-06	2.9469e-06	0
197.902	1.333e-05	1.8077e-06	1.5782e-05	1.3382e-05	7.4339e-06	4.3506e-06	6.5192e-06	3.1996e-06	5.4609e-06	1.1204e-05	2.7631e-06	1.2559e-05	1.1305e-05	4.2924e-06	0
198.902	7.8678e-06	6.4715e-06	5.8731e-06	1.1019e-05	1.0939e-05	4.7617e-06	6.923e-06	3.7612e-06	6.493e-06	2.0663e-05	4.4467e-06	2.3086e-06	7.5474e-06	8.5703e-06	0
199.901	6.0191e-06	1.3131e-05	1.6248e-05	2.4225e-06	6.8819e-06	7.9304e-06	7.0662e-06	8.1118e-06	2.9158e-06	1.7046e-06	3.9655e-06	3.2584e-06	1.0737e-05	7.5517e-06	0
200.901	8.6532e-06	1.3997e-05	6.118e-06	8.1924e-06	1.5616e-05	5.9435e-06	6.5818e-06	6.91e-06	9.1126e-06	3.0684e-06	1.5254e-05	1.1304e-05	6.956e-06	2.157e-06	0
201.9	1.0047e-05	1.8479e-05	4.3643e-06	8.4928e-06	8.7277e-06	9.8326e-06	4.266e-06	1.4844e-06	9.5621e-06	7.5254e-06	1.3392e-05	1.0483e-05	1.0483e-05	3.8487e-06	0
202.9	7.533e-06	5.8074e-06	1.1742e-05	1.0517e-05	2.5605e-05	8.4698e-06	2.505e-06	3.5165e-06	1.4066e-05	7.1639e-06	8.4014e-06	2.1087e-05	1.0977e-05	1.9017e-06	0
203.899	2.5082e-06	1.0268e-05	2.0274e-05	1.1434e-05	1.4131e-05	5.1186e-06	1.4056e-06	6.1614e-06	8.6101e-06	2.3862e-06	1.4219e-05	3.4727e-06	1.2739e-05	8.2051e-06	0
204.899	2.2264e-05	3.6415e-06	4.0437e-06	1.0782e-05	1.5706e-05	1.1508e-05	8.5599e-06	6.2137e-06	5.9463e-06	7.6766e-06	1.618e-05	9.3753e-06	1.8322e-05	1.2247e-05	0
205.898	6.7665e-06	6.4191e-06	9.0389e-06	7.457e-06	8.6363e-06	1.0031e-05	9.3612e-06	8.1769e-06	3.0644e-06	1.1893e-05	1.5375e-05	7.1729e-06	7.2733e-06	5.8548e-06	0
206.898	3.4443e-06	6.0628e-06	1.1e-05	5.9381e-06	6.8628e-06	3.4167e-06	1.0039e-05	2.0671e-06	1.094e-05	4.5587e-06	1.1329e-05	4.5385e-06	7.2343e-06	9.5557e-06	0
207.897	1.115e-05	1.4904e-05	2.2704e-05	8.8532e-06	1.1068e-05	6.4921e-06	8.1668e-06	2.5235e-06	6.1948e-06	9.8309e-06	3.3102e-06	8.808e-06	9.5845e-06	7.8453e-06	0
208.897	4.2557e-06	7.5269e-06	6.8052e-06	1.0313e-05	9.423e-06	6.9651e-06	8.6032e-06	8.7302e-07	1.6051e-05	8.139e-06	6.0759e-06	4.0628e-06	1.8963e-06	4.4089e-06	0
209.896	1.1268e-05	1.062e-05	7.7405e-06	1.4655e-05	1.2432e-05	4.3188e-06	5.1394e-06	4.9261e-06	5.8396e-06	4.1957e-06	4.9569e-06	7.9289e-06	6.8668e-06	6.3466e-06	0
210.896	1.7354e-06	5.5438e-06	1.1588e-05	1.3115e-05	6.3206e-06	4.688e-06	5.3522e-06	4.7841e-06	1.7886e-05	5.2791e-06	1.5051e-05	6.8891e-06	3.7949e-06	1.1587e-05	0
211.895	2.8017e-06	7.0384e-06	8.8992e-06	2.5654e-06	5.5008e-06	1.6256e-05	1.5844e-05	5.6477e-06	6.6829e-07	4.8264e-06	1.4205e-05	5.1001e-06	8.2417e-06	1.0691e-05	0
212.895	5.9669e-06	1.6051e-05	1.8834e-05	1.318e-05	9.6189e-06	8.3578e-06	8.4859e-06	4.4244e-06	7.5049e-06	6.0359e-06	8.5124e-06	7.875e-06	4.9931e-06	9.7999e-06	0
213.894	1.3925e-05	1.0914e-05	8.4805e-06	1.496e-05	1.16e-05	3.5924e-06	5.9175e-06	2.4892e-06	5.1217e-06	3.9595e-06	3.3242e-06	9e-06	2.3599e-06	5.0149e-06	0
214.894	1.6064e-05	3.1806e-06	9.5229e-06	8.9085e-06	1.1094e-05	5.0796e-06	9.8779e-06	6.0995e-06	6.1715e-06	5.402e-06	8.6929e-06	1.0509e-06	2.542e-06	8.1075e-06	0
215.893	1.0799e-05	1.6094e-05	8.0021e-06	1.4768e-05	8.6908e-06	1.7223e-06	1.6701e-05	3.9735e-06	4.4759e-06	7.5484e-06	7.7183e-06	2.9786e-06	6.7178e-06	7.3857e-06	0
216.893	1.2477e-05	1.1525e-05	8.4357e-06	8.7454e-06	7.3734e-06	2.4814e-06	1.7291e-05	2.1946e-06	6.1556e-06	4.1692e-06	9.8577e-06	3.9913e-06	6.3547e-06	8.8464e-06	0
217.892	3.1386e-06	1.4742e-05	3.4546e-06	9.2541e-06	1.4911e-05	2.3595e-06	6.223e-06	8.4476e-06	1.0071e-05	3.2197e-06	5.1656e-06	2.3734e-06	2.9707e-06	7.2731e-06	0
218.892	6.7708e-06	5.1069e-06	1.5193e-05	8.3511e-06	4.8052e-06	3.3583e-06	2.12e-06	3.071e-06	8.0781e-06	4.1845e-06	6.4567e-06	9.5845e-06	3.8403e-06	8.5542e-07	0
219.891	7.4817e-06	9.1586e-06	1.3158e-05	5.152e-06	3.2714e-06	5.4322e-06	4.0363e-06	4.4072e-06	9.2818e-06	6.2403e-06	1.0948e-05	3.3302e-06	8.5894e-06	5.3965e-06	0
220.891	3.8845e-06	6.7973e-06	1.3058e-05	7.2122e-06	2.3354e-06	5.0414e-06	1.1206e-05	4.3565e-06	9.0511e-06	4.4727e-06	6.1084e-06	1.4656e-06	1.0143e-05	7.7829e-06	0
221.89	7.9051e-06	1.3434e-05	8.391e-06	7.5805e-06	2.9443e-06	3.9183e-07	1.4485e-05	6.5962e-06	3.5505e-06	5.595e-06	4.399e-06	5.4151e-06	1.1609e-05	7.9402e-06	0
222.89	1.2779e-05	7.6259e-06	1.5447e-06	7.2816e-06	9.1683e-06	2.5925e-06	5.9483e-06	4.772e-06	1.3724e-06	6.7401e-06	8.427e-06	1.2266e-05	1.3259e-05	5.4032e-06	0
223.889	9.2609e-06	7.42e-06	7.8226e-06	6.1643e-06	6.2523e-06	3.0471e-06	1.1059e-05	3.1542e-06	4.6468e-06	4.7441e-06	5.4841e-06	1.5479e-06	3.6028e-06	7.5184e-06	0
224.889	1.5595e-05	6.6188e-06	8.4709e-06	1.044e-05	6.6993e-06	6.2736e-06	1.095e-05	5.2663e-06	8.5285e-06	5.6834e-06	9.6842e-06	4.1922e-06	8.3836e-06	9.1868e-07	0
225.888	1.514e-05	4.0806e-06	5.2557e-06	2.812e-06	6.1656e-06	5.962e-06	7.2117e-06	5.1008e-06	6.1716e-06	2.5012e-06	1.368e-05	2.1803e-06	6.2825e-06	2.5584e-06	0
226.888	6.8035e-06	1.3567e-05	1.1562e-05	9.6878e-06	7.4906e-06	3.0557e-06	1.2086e-05	9.3628e-06	1.0895e-05	8.0289e-06	5.3481e-06	4.2633e-06	5.8592e-06	1.6022e-06	0
227.887	6.0151e-06	2.2942e-06	4.9017e-06	9.1191e-06	2.6573e-06	4.9253e-06	5.0343e-06	2.4253e-06	6.1982e-06	4.9722e-06	9.2192e-06	4.205e-06	9.3792e-07	7.0002e-06	0
228.887	7.5137e-06	7.9357e-06	2.9969e-06	4.563e-06	9.1038e-06	5.2748e-06	4.4005e-06	7.704e-06	8.8059e-06	8.8585e-06	9.5641e-06	1.3495e-05	3.6448e-06	7.2818e-06	0
229.886	9.0431e-06	4.8544e-06	2.4193e-06	1.2666e-05	9.1173e-06	2.6205e-06	6.7308e-06	2.5614e-06	3.155e-06	2.342e-06	2.5172e-06	5.0703e-06	8.9247e-06	4.0991e-06	0
230.886	6.0912e-06	3.6192e-06	1.4839e-05	7.1637e-06	1.952e-05	1.1163e-05	1.1066e-05	1.7294e-06	9.3731e-06	3.2882e-06	1.0927e-05	4.9858e-06	1.7494e-06	1.8708e-06	0
231.885	8.3738e-06	6.1267e-06	1.9812e-05	1.3274e-05	3.3684e-06	4.5726e-06	9.055e-06	3.0953e-06	4.3193e-06	4.0625e-06	1.1739e-05	1.1918e-06	6.2221e-07	2.9667e-06	0
232.885	1.6348e-05	2.5993e-06	8.8758e-06	4.9569e-06	7.6517e-06	4.1799e-06	1.2808e-06	3.8659e-06	4.7629e-06	4.9717e-06	6.4104e-06	9.7764e-06	9.9194e-06	2.4693e-06	0
233.884	1.4144e-06	5.375e-06	1.2034e-05	6.7357e-06	4.4171e-06	1.4933e-06	1.0738e-06	3.6378e-06	4.2689e-06	7.4571e-07	4.4762e-07	1.1884e-05	1.0694e-05	6.0232e-06	0
234.884	1.1468e-05	9.9114e-06	5.9949e-06	1.2116e-05	8.7512e-06	8.1025e-06	6.3709e-06	4.8755e-06	7.6587e-06	5.3034e-06	3.2457e-06	7.6116e-07	7.4681e-06	3.1319e-06	0
235.883	4.5274e-06	5.6703e-06	2.4368e-06	7.2988e-06	7.6207e-06	6.6688e-06	3.7577e-06	3.2197e-06	3.2671e-06	6.0204e-06	2.6828e-06	6.6632e-06	7.7378e-06	5.0872e-06	0
236.883	2.7602e-06	3.3297e-06	2.5377e-06	7.7051e-06	1.261e-05	2.4152e-06	5.1172e-06	3.4383e-06	8.9885e-06	6.5094e-06	3.3595e-06	4.8855e-06	6.5309e-06	7.178e-06	0
237.882	1.2958e-05	9.5031e-06	4.0633e-06	4.1063e-06	6.9572e-06	1.6509e-06	3.5336e-06	4.6452e-06	1.7779e-06	8.3614e-06	1.4295e-05	7.6331e-06	6.1829e-06	7.3249e-06	0
238.882	9.3267e-06	5.1283e-06	8.0223e-06	1.1467e-05	6.9592e-06	3.9142e-06	9.5849e-06	2.6041e-06	5.547e-06	5.6254e-06	8.6912e-06	3.2228e-06	1.7135e-06	5.2394e-06	0
239.881	6.0963e-06	5.9609e-06	9.4716e-06	9.5159e-06	2.6338e-06	4.6159e-06	6.037e-06	4.1829e-06	8.2858e-06	7.7791e-06	7.3991e-06	7.1006e-06	6.8569e-06	5.5785e-06	0
240.881	1.5566e-05	7.5775e-06	1.8707e-05	8.4922e-06	4.0747e-06	3.3899e-06	6.0432e-06	2.1616e-06	7.6617e-06	4.8971e-06	3.7457e-06	2.5861e-06	3.0191e-06	4.9582e-06	0
241.881	9.1937e-07	1.0957e-05	1.4284e-05	4.9236e-06	3.4028e-06	4.6746e-06	3.0891e-06	2.6637e-06	5.5546e-06	9.2933e-06	1.1253e-05	2.3851e-06	6.8091e-06	8.5324e-06	0
242.88	6.7043e-06	1.8349e-06	7.3441e-06	2.9006e-06	2.5238e-06	4.2673e-06	1.3693e-05	1.8935e-06	7.2207e-06	6.3335e-06	5.442e-06	7.609e-06	1.0977e-05	4.7791e-06	0
243.88	5.8273e-06	4.4646e-06	8.0851e-06	1.1889e-05	7.431e-06	4.7357e-06	2.271e-06	4.6857e-06	1.4785e-06	7.2566e-07	8.6293e-06	7.8833e-06	5.0775e-06	5.9798e-06	0
244.879	3.4203e-06	9.3264e-06	8.2558e-06	1.0076e-05	1.1039e-05	2.9016e-06	7.3389e-06	4.1448e-06	6.0531e-06	7.0632e-06	9.8042e-06	2.4189e-06	1.7749e-06	6.4749e-06	0
245.879	8.2634e-06	1.7449e-06	5.9414e-06	6.1521e-06	5.6764e-06	5.5897e-06	1.4629e-06	9.189e-06	6.3123e-06	8.3068e-06	1.0615e-05	4.4681e-06	1.516e-07	9.4454e-07	0
246.878	4.35e-06	4.3561e-06	2.2441e-06	4.4113e-06	1.1526e-05	1.5969e-06	3.2813e-06	3.7567e-06	3.3312e-06	5.6328e-07	8.2007e-06	3.0805e-06	6.2626e-06	7.0193e-06	0
247.878	2.63e-06	8.8544e-06	1.1495e-05	1.7966e-06	2.2668e-06	3.1576e-06	6.0526e-06	3.5013e-06	1.1049e-06	2.2677e-06	8.4756e-06	4.8782e-06	6.8698e-06	3.0074e-06	0
248.877	4.4444e-06	1.11e-05	5.7672e-06	1.5935e-05	3.7569e-06	3.6707e-06	8.5801e-07	2.3749e-06	3.2048e-06	5.4661e-06	4.1887e-06	7.2019e-06	4.0996e-06	2.6633e-06	0
249.877	4.28e-06	5.664e-06	4.3447e-06	3.1545e-06	9.6972e-06	4.49e-06	3.1888e-06	3.2694e-06	4.0308e-06	7.1631e-06	1.1686e-05	1.0163e-05	6.0442e-06	6.695e-06	0
250.876	3.5002e-06	4.1998e-06	1.573e-05	6.0729e-06	7.5628e-06	4.6484e-06	8.4255e-06	2.9213e-06	4.8021e-06	3.3435e-06	2.5768e-06	5.6288e-06	5.4176e-06	2.7467e-06	0
251.876	1.7675e-06	5.1644e-06	8.6583e-06	1.1477e-05	2.3046e-06	1.4531e-06	4.8277e-06	5.2399e-06	4.5435e-06	4.0128e-06	4.9796e-06	4.6437e-06	5.2963e-06	4.7232e-06	0
252.875	2.0368e-06	4.9146e-06	1.7287e-06	4.2023e-06	6.234e-06	5.468e-06	5.0198e-06	3.0707e-06	3.0766e-06	7.8411e-07	8.0778e-06	3.4324e-06	2.3567e-06	2.9777e-06	0
253.875	4.29e-06	8.1703e-06	7.4399e-07	6.8385e-06	6.6371e-06	4.0276e-06	4.2259e-06	2.3198e-06	2.4331e-06	4.8375e-06	5.3609e-06	3.4449e-06	6.1437e-06	2.3302e-06	0
254.874	6.805e-06	3.0133e-06	2.1099e-06	3.7061e-06	6.7048e-06	5.5542e-06	3.4801e-06	5.1204e-06	6.5874e-06	5.1722e-06	2.583e-06	7.3229e-06	3.0326e-06	5.2949e-06	0
255.874	4.761e-06	4.4935e-06	2.9144e-06	4.9819e-06	5.6875e-06	5.0724e-06	2.9576e-06	3.3452e-06	2.2188e-06	5.9492e-06	2.4085e-06	4.8563e-06	3.2188e-06	3.9563e-06	0
256.873	1.0219e-05	5.7455e-06	1.6139e-06	1.0161e-05	6.1511e-06	8.3735e-06	4.6469e-06	2.9122e-06	3.3316e-06	3.7254e-06	1.1506e-05	2.1822e-06	8.0003e-06	3.135e-06	0
257.873	4.1465e-06	5.1e-07	4.1615e-06	6.6649e-06	8.4708e-06	1.1889e-06	2.2832e-06	7.656e-06	2.3754e-06	7.8258e-06	5.5924e-06	1.9709e-06	1.5245e-05	2.7262e-06	0
258.872	3.1537e-06	4.9674e-06	5.9108e-06	2.6236e-06	4.4318e-06	4.8426e-06	5.0799e-07	4.5299e-06	3.7506e-06	5.6179e-06	8.7438e-06	9.5205e-06	5.1174e-06	2.4394e-06	0
259.872	9.6854e-06	4.6123e-06	3.2141e-06	5.6319e-06	7.7185e-06	1.5446e-06	5.8656e-06	4.2265e-06	1.0834e-05	5.8221e-06	4.8727e-06	4.4906e-06	3.4403e-06	1.5697e-06	0
260.871	8.918e-06	1.2822e-05	7.0533e-06	8.0625e-06	6.6406e-06	9.0134e-06	7.2151e-06	3.4371e-06	4.1164e-06	1.6871e-06	4.8746e-06	2.3953e-06	2.0761e-06	4.3087e-06	0
261.871	2.4865e-06	5.499e-06	1.1816e-05	1.3132e-05	3.6495e-06	4.0709e-06	2.4095e-06	3.1079e-06	5.0801e-06	7.6302e-06	4.6312e-06	3.5917e-06	8.2055e-06	2.7393e-06	0
262.87	3.4956e-06	4.06e-06	7.8691e-06	1.1734e-05	1.0229e-05	4.9042e-06	4.8953e-06	6.2806e-06	4.5426e-06	4.4492e-06	5.3457e-06	5.0531e-06	2.4099e-06	4.232e-06	0
263.87	7.763e-06	9.131e-06	2.0737e-06	7.9035e-06	3.6811e-06	1.196e-06	4.437e-06	3.2632e-06	8.4488e-06	4.1366e-06	6.118e-06	7.0277e-06	4.2035e-06	2.9871e-06	0
264.869	3.1473e-06	4.9502e-06	3.8018e-07	5.3252e-06	8.3954e-06	2.9774e-06	1.6525e-06	2.7175e-06	4.2332e-06	2.7063e-06	5.0182e-06	8.0182e-06	4.4942e-06	6.9876e-07	0
265.869	4.2511e-06	6.5514e-06	1.1223e-05	3.0975e-06	5.8031e-06	5.4586e-06	3.5369e-06	3.6693e-06	4.6002e-06	1.7244e-06	1.3585e-06	5.9726e-06	3.0222e-06	3.3274e-06	0
266.868	5.0336e-06	7.3297e-06	3.5095e-06	4.1209e-06	6.5003e-06	1.8066e-06	8.1516e-06	3.202e-06	2.8376e-06	2.6955e-06	7.5307e-06	1.9571e-06	3.1998e-06	3.8736e-06	0
267.868	5.6282e-06	6.1576e-06	4.5383e-06	6.6014e-06	9.9357e-06	2.86e-06	2.2232e-06	4.205e-06	9.0053e-06	2.4088e-06	4.9656e-06	2.4345e-06	8.2919e-06	3.5915e-06	0
268.867	1.0449e-06	5.4508e-06	6.6958e-06	6.2796e-06	1.607e-06	3.6761e-07	9.2682e-06	5.4691e-06	3.5681e-06	1.8783e-06	5.0794e-06	2.3626e-06	4.4119e-06	2.2739e-06	0
269.867	5.4008e-06	7.5393e-06	3.3221e-06	2.4972e-06	4.4256e-06	2.249e-06	4.0725e-06	5.5247e-06	6.0951e-06	3.1589e-06	3.6659e-06	4.2123e-06	6.2116e-06	3.0078e-06	0
270.866	6.141e-06	3.6575e-06	8.1836e-06	6.8268e-06	1.1072e-05	5.4924e-06	7.7966e-06	2.8396e-06	5.7139e-06	3.0906e-06	3.4859e-06	2.8514e-06	6.4782e-07	4.9862e-06	0
271.866	8.2401e-06	3.4112e-06	5.2219e-06	5.8505e-07	1.1203e-05	2.9109e-06	8.9835e-06	3.6658e-06	3.2851e-06	1.3944e-06	7.9217e-06	8.0495e-06	4.897e-06	1.9103e-06	0
272.865	4.73e-06	5.2001e-06	2.4415e-06	3.2564e-06	3.4491e-06	3.9617e-06	2.535e-06	2.3059e-06	1.6846e-06	3.7386e-06	7.2722e-07	6.7206e-06	5.5261e-06	5.6604e-07	0
273.865	6.7255e-06	4.5839e-06	6.3659e-06	4.0116e-06	1.4544e-06	4.1179e-06	3.3737e-06	4.4414e-06	4.1145e-06	4.4189e-06	1.2279e-06	4.0998e-06	6.4967e-06	2.0644e-06	0
274.864	5.4491e-06	5.3206e-06	5.2663e-06	6.8178e-06	4.0129e-06	3.0581e-06	2.7576e-06	2.3727e-06	6.9806e-06	2.9244e-06	1.7843e-06	7.3512e-06	2.4788e-06	2.384e-06	0
275.864	2.6109e-06	2.3146e-06	6.3829e-06	1.1297e-05	2.9077e-06	3.6409e-06	6.6362e-06	4.337e-06	3.3752e-06	8.2346e-06	1.6953e-06	3.3585e-06	3.164e-06	1.1629e-06	0
276.863	4.603e-06	6.3086e-06	6.7451e-06	2.0557e-06	4.6751e-06	4.5052e-06	3.285e-06	2.9799e-06	3.4083e-06	4.0653e-06	8.1374e-06	1.5053e-06	4.466e-06	6.0485e-06	0
277.863	2.3761e-06	2.8975e-06	3.6259e-06	3.1246e-06	1.1514e-06	3.5389e-06	2.8518e-06	1.2734e-06	3.1619e-06	2.3722e-06	2.8682e-06	2.0386e-06	4.5731e-06	6.9313e-06	0
278.862	2.3115e-06	3.8986e-06	4.9791e-06	9.2345e-06	1.2455e-05	4.8776e-06	4.5205e-06	4.6739e-06	5.2316e-07	3.0234e-06	4.8671e-06	2.8527e-06	1.3427e-06	4.184e-06	0
279.862	9.5304e-06	7.3661e-06	4.0483e-06	3.6093e-06	4.2732e-06	4.7946e-06	8.4303e-06	2.7393e-06	2.0325e-06	5.8177e-06	4.171e-06	2.7182e-06	3.8464e-06	4.4071e-06	0
280.861	3.6569e-06	3.2606e-06	4.1186e-06	2.7976e-06	1.8204e-06	1.7433e-06	7.6579e-07	4.8811e-06	2.5176e-06	4.0447e-06	1.6338e-06	4.2287e-06	1.5176e-06	2.5938e-06	0
281.861	3.4117e-06	3.213e-06	4.6795e-06	8.9252e-06	6.3029e-06	8.2998e-07	2.8994e-06	3.5909e-06	4.6963e-06	1.4703e-06	3.8976e-06	1.2566e-06	6.4344e-06	1.1089e-06	0
282.86	7.1235e-06	5.7343e-06	3.1637e-06	3.9019e-06	1.8564e-06	2.8423e-06	6.2489e-06	2.8043e-06	2.9838e-06	1.7076e-06	2.0186e-06	3.8741e-06	8.1068e-06	1.2501e-06	0
283.86	8.4202e-06	7.8454e-06	5.0115e-06	4.2056e-06	3.3488e-06	4.3347e-06	2.2839e-06	4.8134e-07	5.1446e-06	4.6487e-06	1.0663e-05	9.9005e-07	7.6216e-06	1.4249e-06	0
284.859	3.4977e-06	2.1609e-06	3.8059e-06	5.6201e-06	6.7178e-06	2.0646e-06	6.5541e-07	2.8034e-06	2.1009e-06	3.6676e-06	3.304e-06	3.6959e-06	2.4442e-07	6.3373e-06	0
285.859	3.1393e-06	6.2705e-06	6.6445e-06	4.4963e-06	8.6885e-06	1.6152e-06	7.1206e-06	4.0139e-06	1.1808e-06	4.1845e-06	1.8901e-06	3.5439e-06	3.3798e-06	5.1423e-06	0
286.858	3.2401e-06	6.2354e-06	4.5632e-06	5.5586e-06	4.1548e-06	4.5465e-06	1.6892e-06	1.3685e-06	2.7955e-06	3.9508e-06	5.2632e-06	2.9933e-06	3.4303e-06	1.5605e-06	0
287.858	1.6778e-06	4.7701e-06	5.1217e-06	1.4708e-06	1.1113e-06	1.9354e-06	3.1695e-06	4.5362e-06	1.5815e-06	3.1799e-06	3.0991e-06	1.5641e-06	2.7391e-06	7.7962e-07	0
288.857	5.5459e-06	2.9992e-06	7.3273e-06	3.41e-06	3.2382e-06	4.8556e-07	4.9001e-06	8.3051e-06	4.5332e-06	1.7425e-06	3.8268e-06	4.3148e-06	3.5386e-06	2.6047e-06	0
289.857	2.6647e-06	3.1017e-06	9.813e-06	4.6023e-06	3.6584e-06	5.3754e-06	3.3979e-06	2.2281e-06	3.4446e-06	6.2786e-06	4.1152e-06	1.9004e-06	2.2455e-06	2.9627e-06	0
290.856	7.2802e-06	3.8569e-06	2.2602e-06	2.1898e-06	2.9892e-06	4.6268e-06	3.9051e-06	1.1054e-06	1.8501e-06	5.3557e-06	4.9862e-06	3.0289e-06	3.5858e-06	3.8621e-06	0
291.856	5.3481e-06	2.1009e-06	5.6784e-06	2.276e-06	5.8738e-06	1.5395e-06	6.6009e-06	6.4639e-06	3.0873e-06	1.583e-06	3.0477e-06	2.2993e-06	6.5499e-06	2.4941e-06	0
292.855	5.2641e-06	1.0192e-06	4.6785e-06	8.7332e-06	4.218e-06	4.5364e-06	4.4026e-06	2.8285e-06	3.775e-06	5.491e-06	4.382e-06	2.4345e-06	4.6588e-06	5.4867e-06	0
293.855	3.6156e-06	1.5566e-06	4.8453e-06	2.9271e-06	7.8897e-06	9.1201e-07	2.6579e-06	2.7298e-06	1.9349e-06	4.7241e-06	3.4774e-06	4.8138e-06	5.6575e-06	1.5581e-06	0
294.854	5.2286e-06	5.2907e-06	8.0724e-06	6.1599e-06	5.8194e-06	1.4444e-06	1.5218e-06	2.388e-06	1.5798e-06	1.4393e-06	2.4475e-06	2.7471e-06	2.9839e-06	2.7231e-06	0
295.854	1.7243e-06	2.0453e-06	4.8859e-06	3.069e-06	5.9277e-06	3.6082e-06	3.0969e-06	5.9108e-07	1.2618e-06	6.6906e-06	4.2412e-06	1.508e-06	4.6467e-06	3.0762e-06	0
296.853	4.3429e-06	3.323e-06	4.3946e-06	3.5753e-06	1.8119e-06	5.324e-06	2.1655e-06	1.8696e-06	2.8918e-06	1.0037e-06	6.2508e-07	7.1808e-06	2.8199e-06	1.2653e-06	0
297.853	3.6977e-06	4.7316e-06	4.0998e-06	5.6186e-06	2.5369e-06	6.1094e-07	1.0452e-06	3.6846e-06	4.9955e-07	2.0033e-06	6.7004e-06	5.0241e-06	1.8117e-06	2.746e-06	0
298.852	2.6983e-06	1.909e-06	8.679e-07	3.6914e-06	4.1376e-06	2.6994e-06	5.9475e-06	1.3536e-06	2.9061e-06	1.0166e-06	2.3172e-06	4.2177e-06	3.9494e-06	2.7273e-06	0
299.852	7.4885e-06	4.8946e-06	4.008e-06	8.9616e-06	5.4087e-06	9.6295e-07	2.0285e-06	4.5285e-06	2.0458e-06	2.469e-06	3.5746e-06	3.8498e-06	4.994e-06	4.633e-06	0
300.851	2.8812e-06	2.7319e-06	2.9963e-06	7.8923e-06	5.5492e-06	3.7204e-06	3.4083e-06	3.7219e-06	6.5244e-06	2.0991e-06	1.9579e-06	5.6432e-06	5.426e-06	3.315e-06	0
301.851	3.2781e-06	4.9416e-06	4.8748e-06	6.1678e-06	3.7459e-06	1.3098e-06	1.744e-06	2.5989e-06	2.2331e-06	7.0676e-06	1.3822e-06	1.7698e-06	5.0186e-06	2.7958e-06	0
302.85	7.8158e-06	9.9059e-07	1.6338e-06	3.8459e-06	2.6096e-06	3.0362e-06	3.2908e-06	2.1893e-06	3.4252e-06	1.7307e-06	5.9961e-06	2.8895e-06	4.6801e-06	1.5998e-06	0
303.85	2.9302e-06	9.3912e-06	7.0007e-06	5.0016e-06	4.9738e-06	1.1185e-06	8.7285e-06	4.8063e-06	6.1322e-06	8.2164e-06	2.5695e-06	4.0335e-06	6.85e-06	2.4297e-06	0
304.849	2.8587e-06	6.9035e-06	3.8349e-06	8.1037e-07	4.878e-06	3.9037e-06	4.452e-06	3.1244e-06	2.7968e-06	3.5741e-06	8.3606e-06	4.0788e-06	8.2427e-06	4.7436e-06	0
305.849	8.3578e-06	3.3269e-06	4.8123e-06	1.7618e-07	5.5945e-06	3.3705e-06	5.342e-06	1.318e-06	3.2843e-06	6.628e-06	4.5752e-06	2.9692e-06	4.3988e-06	3.0577e-06	0
306.848	4.5902e-06	7.8757e-06	4.1192e-06	2.7858e-06	3.2761e-06	3.6614e-06	1.7063e-06	9.7013e-07	4.6409e-06	3.8805e-06	5.2348e-06	5.0416e-07	1.6597e-06	1.9366e-06	0
307.848	1.562e-06	6.6744e-07	4.1431e-06	8.4856e-06	5.9944e-06	3.5864e-06	2.6932e-06	4.8363e-06	3.4421e-06	1.2332e-06	6.9287e-07	4.6736e-06	2.9478e-06	2.4552e-06	0
308.847	8.0235e-06	2.1087e-06	4.0051e-06	6.6501e-07	4.3456e-06	1.317e-06	1.0914e-06	3.6681e-06	2.1161e-06	4.1454e-06	1.4642e-06	1.5101e-06	2.0829e-06	5.9441e-06	0
309.847	3.6224e-06	2.1065e-06	3.5856e-06	6.645e-06	4.7364e-06	4.356e-06	4.8895e-06	1.3155e-06	3.8448e-06	4.5695e-06	3.8236e-06	4.1749e-06	6.8905e-06	1.5235e-06	0
310.846	5.1788e-06	1.9384e-06	9.705e-07	4.969e-06	4.1588e-06	2.2909e-06	2.5044e-06	1.8996e-06	4.2131e-06	2.453e-06	6.6058e-06	4.1434e-06	4.6517e-06	2.5934e-06	0
311.846	4.7552e-06	2.2478e-06	1.1811e-05	2.358e-06	2.1547e-06	1.6631e-06	2.2382e-06	1.9813e-06	2.5217e-06	2.1379e-06	2.4925e-06	4.1258e-06	1.9986e-06	3.9403e-06	0
312.845	4.7328e-06	5.5048e-06	6.1037e-06	5.6084e-06	1.5112e-06	1.6961e-06	3.3722e-06	2.9419e-06	4.429e-06	9.3896e-07	1.1155e-05	3.524e-06	3.9224e-06	2.3261e-06	0
313.845	1.8631e-06	6.0556e-07	4.3619e-06	2.788e-06	4.8173e-06	3.5104e-06	5.4501e-06	2.1143e-06	5.4215e-06	1.0314e-06	2.3141e-06	7.1803e-07	4.3097e-06	9.5398e-07	0
314.844	3.6631e-06	2.5381e-06	6.3232e-06	3.1658e-06	5.1032e-06	3.5128e-06	3.4917e-06	1.8918e-06	5.8631e-06	2.8137e-06	2.3464e-06	2.4381e-06	1.1607e-06	1.4038e-06	0
315.844	3.4805e-06	5.6765e-06	4.2118e-06	1.3784e-06	2.8664e-06	2.3194e-06	3.9031e-06	2.0446e-06	1.9508e-06	4.873e-06	1.3241e-06	3.3791e-06	1.7394e-06	2.4834e-06	0
316.843	5.3787e-06	2.8737e-06	2.572e-06	1.5697e-06	3.1922e-06	1.8202e-06	5.0337e-06	7.1288e-07	4.7257e-06	2.2528e-06	4.4539e-06	1.6492e-06	1.0408e-06	1.7818e-06	0
317.843	5.3459e-06	2.2168e-06	6.0311e-06	5.4177e-06	2.9441e-06	4.0276e-06	6.6826e-06	1.14e-06	5.2486e-06	2.4383e-06	4.9274e-06	2.8942e-06	3.984e-06	9.5569e-07	0
318.842	1.7949e-06	2.8831e-06	2.5514e-06	1.0499e-06	2.4403e-06	8.6507e-07	2.2336e-06	4.0922e-06	5.4392e-06	4.6239e-06	3.9303e-06	2.2962e-06	5.3264e-06	2.1249e-06	0
319.842	2.9722e-06	7.0719e-06	3.6072e-06	5.1986e-06	3.2101e-06	2.2556e-06	6.1622e-07	1.1628e-06	4.275e-06	4.5718e-07	2.4329e-06	5.442e-06	8.0193e-06	1.2504e-06	0
320.841	7.3555e-06	6.1617e-06	2.5364e-06	3.6739e-06	3.5382e-06	2.2381e-06	9.3104e-07	1.4817e-06	2.3369e-06	4.4917e-06	3.3737e-06	1.522e-06	1.0387e-06	3.4364e-06	0
321.841	1.9816e-06	3.9713e-06	6.686e-06	2.4441e-06	2.8465e-06	2.7017e-06	2.2732e-06	1.9073e-06	6.1161e-06	2.1943e-06	1.3893e-06	4.5892e-06	1.478e-06	2.463e-06	0
322.841	6.8038e-06	5.2197e-06	3.4812e-06	4.501e-06	6.469e-06	3.8792e-06	1.0484e-06	6.6749e-06	5.3228e-06	3.4101e-06	2.9438e-06	2.9611e-06	7.2971e-06	2.9616e-06	0
323.84	2.7782e-06	1.046e-06	3.6623e-06	4.8345e-06	3.4188e-06	2.2589e-06	4.0719e-06	2.0784e-06	2.2449e-06	1.0714e-06	7.7029e-06	3.2285e-06	4.1256e-06	2.8542e-06	0
324.84	7.2201e-06	1.5089e-06	2.4732e-06	3.2679e-06	3.3484e-06	3.5805e-06	1.261e-06	1.3451e-06	2.5977e-06	3.6388e-06	2.2983e-06	2.4589e-06	5.0652e-06	2.9985e-06	0
325.839	5.9544e-06	1.2515e-06	5.9889e-06	6.5775e-06	4.7406e-06	1.598e-06	4.8926e-06	6.1596e-07	2.3747e-06	2.6639e-06	4.125e-06	7.6932e-07	1.599e-06	2.0309e-06	0
326.839	4.3597e-06	4.1206e-06	9.907e-06	1.6842e-06	3.4321e-06	4.7395e-06	9.5233e-07	1.7657e-06	7.534e-07	4.7902e-06	2.8804e-06	1.2697e-06	1.3621e-06	2.5358e-06	0
327.838	5.895e-06	2.031e-06	2.2315e-06	8.4904e-07	4.5133e-06	2.0748e-06	5.2098e-06	2.8994e-06	1.8228e-06	4.8969e-06	3.6719e-06	4.3765e-06	3.3219e-06	2.7942e-06	0
328.838	4.2581e-06	1.2838e-06	3.2336e-06	6.8167e-06	5.9571e-06	5.2542e-07	2.6001e-06	2.0485e-06	2.2288e-06	2.7443e-06	2.3351e-06	6.3812e-06	2.5605e-06	2.9228e-06	0
329.837	3.7868e-06	4.9183e-06	2.1747e-06	8.676e-06	1.0341e-06	1.3169e-06	4.1029e-06	1.7038e-06	3.8275e-06	3.6279e-06	4.3714e-06	5.2741e-07	2.8474e-06	3.3165e-06	0
330.837	5.9708e-06	2.2048e-06	4.0432e-06	5.2184e-06	4.2608e-06	2.8754e-06	1.0584e-06	3.0144e-06	1.6937e-06	2.6772e-06	1.922e-06	1.3108e-06	1.4497e-06	4.4132e-06	0
331.836	3.6094e-06	2.9543e-06	1.5209e-06	4.6333e-06	4.6006e-06	1.5185e-07	6.5464e-06	3.4555e-06	3.5637e-06	1.6601e-06	1.9658e-06	3.973e-06	5.9222e-06	2.1378e-06	0
332.836	2.7169e-06	3.4631e-06	5.4175e-06	2.2746e-06	1.4542e-06	1.6512e-06	5.0135e-06	1.4966e-06	3.3485e-06	2.25e-06	1.1152e-06	3.5362e-06	1.5035e-06	6.456e-07	0
333.835	1.0009e-06	1.6824e-06	4.3325e-06	3.1198e-06	2.9484e-06	1.5304e-06	2.0856e-06	1.6224e-06	7.6857e-07	3.1748e-06	3.7476e-06	2.5672e-06	5.0871e-06	2.8226e-06	0
334.835	4.1972e-06	3.1763e-06	4.1636e-06	6.8354e-06	3.462e-06	4.6964e-06	2.8843e-06	1.4347e-06	3.5657e-06	4.675e-06	3.5261e-06	2.8293e-06	5.8985e-06	2.9342e-06	0
335.834	2.1878e-06	8.5842e-06	3.5579e-06	5.3537e-07	3.0092e-06	2.1455e-06	3.3231e-06	1.6762e-06	9.3549e-07	8.3058e-07	4.0571e-06	2.9241e-06	8.7289e-06	2.9065e-06	0
336.834	1.2914e-06	4.3147e-06	3.993e-06	5.3117e-06	1.1087e-06	9.0137e-07	2.3868e-06	2.4054e-06	1.9445e-06	2.6772e-06	3.7836e-06	5.0948e-06	4.0562e-06	1.1304e-06	0
337.833	3.6111e-06	5.542e-06	6.5198e-06	6.5053e-06	6.333e-07	2.0273e-06	9.4902e-07	2.8799e-06	2.7513e-06	6.0658e-06	4.5178e-06	3.5513e-06	4.8129e-06	1.304e-06	0
338.833	2.1075e-06	3.7694e-06	1.2241e-06	3.0171e-06	7.5863e-06	4.5491e-06	1.0477e-06	2.2019e-06	2.41e-06	1.1191e-06	4.2282e-06	4.0323e-06	1.3206e-06	1.9103e-06	0
339.832	4.7965e-06	5.9429e-06	1.9274e-06	2.4161e-06	4.1276e-06	3.7162e-07	1.3664e-06	4.7953e-06	5.3137e-06	3.7172e-06	4.236e-06	1.935e-06	1.5625e-06	2.7183e-06	0
340.832	2.7988e-06	3.9881e-06	4.1067e-06	4.3683e-06	7.5227e-06	1.0734e-06	5.2644e-06	2.3887e-06	3.7703e-06	4.2398e-06	3.3627e-06	4.1209e-06	2.5336e-06	2.1972e-06	0
341.831	2.9591e-06	5.3434e-06	1.6914e-06	1.0418e-06	3.8832e-06	1.7051e-06	1.7838e-06	1.5683e-06	5.8308e-06	9.6385e-07	3.2392e-06	8.1125e-07	4.86e-06	1.3868e-06	0
342.831	4.7073e-06	5.7737e-06	6.9145e-06	4.1481e-06	1.4981e-06	1.6954e-06	2.8928e-06	1.0829e-06	3.8371e-06	2.3605e-06	1.3963e-06	1.3737e-06	2.8954e-06	2.1741e-06	0
343.83	2.774e-06	4.653e-06	4.4874e-06	1.2119e-06	2.4884e-06	2.9421e-06	2.1199e-06	7.6475e-07	4.9005e-06	4.3186e-07	1.5407e-06	4.3339e-06	5.4158e-06	1.3181e-06	0
344.83	4.4403e-06	2.8191e-06	7.0276e-06	3.0575e-06	1.8682e-06	2.2325e-06	3.1904e-06	2.2431e-06	3.1344e-06	2.2584e-06	2.1472e-06	3.0878e-06	1.5165e-06	4.4448e-06	0
345.829	4.1706e-06	3.9808e-06	2.4349e-06	1.9153e-06	2.0536e-06	8.1279e-07	3.2495e-06	3.5384e-06	3.0784e-06	1.967e-06	3.4537e-06	4.174e-06	9.1811e-07	3.4113e-06	0
346.829	4.6535e-07	4.176e-06	5.3158e-06	8.7376e-07	9.183e-07	3.5088e-07	3.6961e-06	6.2206e-07	1.4817e-06	5.5358e-06	2.6777e-06	1.9196e-06	1.8061e-06	2.2961e-06	0
347.828	1.3825e-06	1.7636e-06	6.2968e-06	4.3637e-06	5.6138e-06	2.7487e-06	3.8063e-06	2.7962e-06	5.3445e-07	2.2329e-06	2.7689e-06	4.3642e-06	3.705e-06	2.7813e-06	0
348.828	3.8286e-06	1.6368e-06	2.9677e-07	1.5899e-06	6.4344e-06	1.7934e-06	3.5534e-06	1.8617e-06	1.4681e-06	4.7391e-06	3.1896e-06	1.9431e-06	3.1132e-06	2.8222e-06	0
349.827	2.1595e-06	2.1707e-06	4.9717e-06	4.7394e-06	2.9961e-06	1.4467e-06	8.1188e-07	4.2181e-06	4.577e-07	2.5653e-06	1.8217e-06	1.6582e-06	1.0877e-06	3.251e-06	0
350.827	3.2292e-06	1.3869e-06	3.5713e-06	2.5202e-06	6.0972e-06	2.3451e-06	3.2098e-06	1.3243e-06	3.2834e-06	5.6296e-06	7.096e-06	1.9016e-06	1.9328e-06	1.2862e-06	0
351.826	1.1661e-06	6.6386e-06	1.8968e-06	4.031e-06	4.3417e-06	2.2828e-06	3.7867e-06	2.7903e-06	1.3826e-06	1.9152e-06	2.3262e-06	2.8116e-06	4.3095e-06	1.1225e-06	0
352.826	4.6963e-06	3.9355e-06	4.2708e-06	9.213e-07	3.5874e-06	4.1636e-07	1.6416e-06	1.4262e-06	1.8943e-06	1.2725e-06	4.3527e-06	3.7977e-06	2.0311e-06	1.7852e-06	0
353.825	1.058e-06	2.1742e-06	4.8827e-06	2.2381e-06	3.3721e-06	3.2394e-06	3.0563e-06	2.4847e-06	1.2118e-06	3.348e-06	3.4496e-06	4.5347e-06	1.9603e-06	3.335e-06	0
354.825	1.5813e-06	3.1802e-06	3.6678e-06	4.6909e-06	1.0457e-06	7.6762e-07	1.8036e-06	4.4542e-07	4.2999e-06	2.6003e-06	1.0407e-06	8.0203e-07	6.6542e-06	2.5129e-06	0
355.824	6.2035e-06	5.508e-06	4.8168e-06	3.4978e-06	1.9761e-06	1.8335e-06	3.6007e-06	2.9198e-06	2.1556e-06	1.5307e-06	4.2383e-07	2.0646e-06	3.5138e-06	1.824e-06	0
356.824	5.1976e-06	4.7092e-06	5.3512e-06	4.3383e-06	6.8044e-06	1.2037e-06	1.2107e-06	4.9843e-06	2.5931e-06	2.1301e-06	2.6161e-06	3.3097e-06	3.8489e-06	1.6646e-06	0
357.823	3.2488e-06	1.1311e-06	4.8984e-06	2.1732e-06	5.9822e-06	1.7e-06	1.9357e-06	1.5086e-06	1.8719e-06	3.467e-06	1.6163e-06	1.7354e-06	6.5735e-06	2.8042e-06	0
358.823	6.1044e-06	1.8542e-06	6.9991e-06	1.8727e-06	4.4587e-06	1.0259e-06	3.0535e-06	2.8651e-06	9.9527e-07	3.6524e-06	1.8142e-06	1.3356e-06	3.4416e-06	3.3875e-06	0
359.822	1.451e-06	3.0602e-06	6.1804e-06	2.6171e-06	2.0279e-06	1.7209e-06	9.1943e-07	1.5086e-06	4.5566e-06	2.5904e-06	3.0897e-06	8.4346e-07	4.4637e-06	2.1493e-06	0
360.822	2.3858e-06	3.7774e-06	4.951e-06	3.5243e-06	2.5706e-06	3.1266e-06	2.8697e-06	2.8102e-06	3.4152e-06	8.5121e-07	4.2475e-06	2.6482e-06	4.785e-06	1.5239e-06	0
361.821	5.0211e-06	1.3532e-06	4.4941e-06	4.0837e-06	5.787e-06	1.1006e-06	5.5465e-07	1.6458e-06	3.6904e-06	3.9413e-06	1.4402e-06	2.2106e-06	2.5313e-06	4.1212e-06	0
362.821	1.4465e-06	2.3995e-06	3.8481e-06	2.6665e-06	5.8256e-06	1.9816e-06	4.3092e-06	3.4291e-06	2.2163e-06	1.0055e-06	2.5656e-06	4.0369e-06	1.629e-06	1.5451e-06	0
363.82	2.854e-06	3.0096e-06	1.0404e-06	4.3341e-06	3.7906e-06	1.9113e-06	1.5703e-06	3.6345e-06	2.5677e-06	1.5993e-06	4.6859e-06	1.1568e-06	3.0061e-06	1.247e-06	0
364.82	7.4515e-06	4.1898e-06	6.9769e-07	6.3279e-06	3.4445e-06	3.3204e-06	2.4684e-06	2.1337e-06	3.3411e-06	4.8786e-06	1.8686e-06	6.0745e-06	4.308e-06	2.91e-06	0
365.819	2.1119e-06	1.4918e-06	4.7317e-06	5.9732e-06	2.6558e-06	1.5716e-06	4.4348e-06	2.4638e-06	1.3695e-06	3.6666e-06	1.0168e-06	2.8561e-06	4.4451e-06	2.2749e-06	0
366.819	3.1506e-06	2.6933e-06	7.7324e-06	4.6108e-06	8.8452e-07	5.801e-07	7.8725e-07	4.1721e-06	4.1008e-06	7.9345e-07	2.0179e-06	1.0139e-06	1.9694e-06	2.2011e-06	0
367.818	3.7601e-07	3.8724e-06	2.7004e-06	1.7426e-06	4.6857e-06	1.7859e-06	2.9724e-06	1.6669e-06	3.2226e-06	1.3942e-06	2.8294e-06	3.6425e-06	4.6106e-06	2.3433e-06	0
368.818	2.6152e-06	1.5886e-06	3.9969e-06	2.3273e-06	1.1848e-06	1.6934e-06	2.5677e-06	4.4866e-07	2.2919e-06	2.6749e-06	1.3825e-06	1.1533e-06	2.1469e-06	4.6449e-06	0
369.817	3.3385e-06	1.6749e-06	3.6495e-06	4.0977e-06	1.6603e-06	5.6178e-07	2.5269e-06	3.1726e-06	2.6248e-06	3.4431e-06	5.7838e-07	3.1181e-06	6.1849e-07	1.4323e-06	0
370.817	1.3512e-06	4.1152e-06	5.2717e-06	5.7598e-06	3.5519e-06	1.1174e-06	4.681e-06	2.4187e-06	3.8429e-06	7.4056e-07	3.5175e-06	1.855e-06	2.6019e-06	3.0649e-07	0
371.816	3.6633e-06	4.7624e-06	2.6994e-06	2.6501e-06	3.6033e-06	1.9721e-06	1.7223e-06	2.0489e-07	4.9061e-07	3.4846e-06	1.6828e-06	1.8923e-06	2.2826e-06	5.2587e-06	0
372.816	3.695e-06	2.0924e-06	5.4712e-06	6.4058e-07	2.1814e-06	1.255e-06	2.4252e-06	1.9824e-06	5.1373e-07	1.7026e-06	1.4031e-06	3.9161e-06	1.9849e-06	9.961e-07	0
373.815	4.5991e-06	3.3275e-06	5.8731e-06	4.3289e-06	1.9495e-06	1.6326e-06	2.1421e-06	1.7582e-06	2.3326e-06	1.6736e-06	3.4177e-06	2.9279e-06	4.0129e-06	2.0626e-06	0
374.815	6.5002e-06	3.0087e-06	3.8621e-06	3.9028e-06	1.5392e-06	2.6695e-06	1.643e-06	1.2853e-06	6.2002e-07	4.327e-06	5.8913e-06	2.0817e-06	2.8906e-06	2.2921e-06	0
375.814	3.7986e-06	1.314e-06	5.6667e-06	3.8459e-06	2.0236e-06	1.1239e-06	1.6323e-06	2.4993e-06	3.4306e-06	3.9888e-06	3.5403e-06	3.2497e-06	4.2995e-06	1.3574e-06	0
376.814	3.5345e-06	2.395e-06	4.7459e-06	1.9961e-06	3.5409e-06	2.7383e-06	2.2431e-06	2.3884e-06	2.7464e-06	5.6929e-07	5.0289e-06	1.656e-06	2.3921e-06	2.012e-06	0
377.813	3.362e-06	2.7321e-06	3.0823e-06	7.1191e-06	3.3356e-06	3.7324e-06	2.1748e-07	1.1495e-06	1.807e-06	2.5655e-06	4.0556e-07	4.6529e-06	4.4044e-06	9.4021e-07	0
378.813	8.2501e-06	2.7577e-06	6.3387e-06	3.6446e-06	3.9983e-06	6.1149e-07	4.4924e-06	7.6613e-07	5.2898e-06	3.6973e-07	4.3523e-06	4.3911e-06	1.8333e-06	9.5305e-07	0
379.812	2.9845e-06	4.4942e-06	4.6023e-06	1.4184e-06	1.1521e-06	3.3848e-06	4.5392e-06	4.0206e-06	2.1922e-06	2.6082e-06	1.6024e-06	1.3826e-06	2.9501e-07	2.4756e-06	0
380.812	3.8608e-06	1.2734e-06	3.041e-06	7.7467e-07	1.4325e-06	9.9061e-07	1.6709e-06	1.306e-06	1.2775e-06	1.9983e-06	3.7802e-06	2.8137e-06	1.1458e-06	2.5903e-06	0
381.811	1.899e-06	6.8352e-07	3.343e-06	1.6963e-06	5.2004e-06	2.848e-06	8.5924e-07	1.3797e-06	1.5492e-06	1.7232e-06	3.281e-06	5.0694e-07	1.8025e-06	1.7273e-06	0
382.811	3.7723e-06	2.0369e-06	5.0854e-06	3.2982e-06	3.1191e-06	5.3135e-07	1.8705e-06	2.1449e-06	1.7713e-06	2.612e-06	1.0733e-06	1.3895e-06	1.8007e-06	2.4164e-06	0
383.81	2.4394e-06	4.0752e-06	4.0096e-06	2.7624e-06	3.5333e-06	1.4585e-06	6.3317e-07	3.004e-06	2.7988e-06	3.1045e-06	4.7406e-06	4.3839e-06	1.8688e-06	2.2177e-06	0
384.81	2.0239e-06	3.2315e-06	3.6142e-06	1.6623e-06	2.494e-06	7.283e-07	2.7368e-06	1.6726e-06	9.6594e-07	3.9435e-06	2.1638e-06	4.1576e-06	3.871e-06	2.3763e-07	0
385.809	2.456e-06	1.6369e-06	5.9571e-06	2.6442e-06	7.3481e-07	3.1445e-07	3.332e-06	3.0688e-06	1.0496e-06	2.2325e-06	1.7978e-06	3.881e-06	1.9202e-06	3.3019e-06	0
386.809	4.0567e-06	2.5631e-06	3.6208e-06	1.1631e-06	2.3493e-06	3.5084e-06	2.2093e-07	1.3969e-06	3.4562e-06	4.7027e-06	4.9726e-06	3.8239e-06	3.8476e-06	5.1987e-07	0
387.808	2.1149e-06	1.0854e-06	3.6425e-06	4.0619e-06	2.1828e-06	9.6606e-07	1.4684e-06	1.0666e-06	1.7664e-06	2.7711e-06	3.9685e-06	1.1024e-06	1.6188e-06	1.3093e-06	0
388.808	5.7075e-06	3.834e-06	6.3651e-06	4.5987e-06	1.5335e-06	1.4824e-06	1.3724e-06	5.5417e-07	2.2824e-06	3.0376e-06	1.7777e-06	2.9299e-06	3.6412e-06	1.86e-06	0
389.807	2.0712e-06	4.0752e-06	3.364e-06	3.7916e-06	5.5484e-06	8.1909e-07	4.4731e-06	1.6777e-06	2.9728e-06	2.4032e-06	6.7759e-07	1.0779e-06	3.6306e-06	2.8535e-07	0
390.807	1.9902e-06	1.2637e-07	2.6187e-06	1.6664e-06	4.9558e-06	1.7958e-06	1.7094e-06	4.2646e-07	2.9781e-06	1.2867e-06	1.1789e-06	3.8231e-06	2.1786e-06	2.7937e-06	0
391.806	4.9875e-06	2.9919e-06	9.9977e-07	4.0821e-06	3.082e-06	2.4096e-06	3.928e-06	1.3799e-06	1.5683e-06	1.7734e-06	1.5424e-06	9.77e-07	2.7519e-06	3.4641e-06	0
392.806	2.6806e-06	1.1139e-06	3.4496e-06	7.2944e-07	3.0055e-06	1.503e-06	3.9251e-06	3.5545e-06	1.9805e-06	2.8176e-06	1.7573e-06	1.3523e-06	3.0713e-06	1.3987e-06	0
393.805	2.5118e-06	9.9936e-07	9.0716e-07	2.6571e-06	1.5756e-06	2.4153e-06	1.681e-06	8.7264e-07	3.1718e-06	9.9328e-07	1.2323e-06	3.0391e-06	1.6268e-06	1.7296e-06	0
394.805	4.1448e-06	1.1808e-06	3.4944e-06	4.1965e-06	1.629e-06	8.1161e-07	1.0086e-06	3.7984e-07	2.976e-06	2.1299e-06	2.9153e-06	3.4047e-06	1.1265e-06	1.8807e-06	0
395.804	1.2137e-06	1.9445e-06	3.268e-06	4.3369e-06	4.2758e-06	8.3107e-07	5.9878e-07	1.7257e-06	9.9468e-07	3.7899e-06	1.7811e-06	1.3455e-06	2.7923e-06	2.9187e-06	0
396.804	2.1086e-06	1.8794e-06	5.5236e-06	1.1864e-06	3.1215e-06	9.8626e-07	2.1452e-06	1.5701e-06	1.3008e-06	7.5623e-07	3.6554e-06	3.1016e-06	3.0318e-06	2.611e-06	0
397.803	2.1782e-06	1.6689e-06	1.6964e-06	2.0758e-06	2.0851e-06	2.3971e-06	1.7633e-06	1.038e-06	1.0919e-07	1.675e-06	9.5348e-07	2.996e-06	3.9911e-06	2.7387e-06	0
398.803	2.2189e-06	1.8512e-06	4.966e-06	2.3972e-06	3.971e-06	7.678e-07	2.9146e-06	2.971e-06	3.1886e-06	1.3792e-06	2.0459e-06	2.2921e-06	9.7066e-07	3.3113e-06	0
399.803	3.0633e-06	2.0277e-06	2.5418e-06	2.4028e-06	2.7405e-06	3.0757e-06	3.6432e-06	2.2012e-06	3.9681e-06	1.9237e-06	2.0486e-06	1.8897e-06	2.3039e-06	8.7603e-07	0
400.802	4.0495e-06	2.7769e-06	4.3117e-06	4.6406e-06	1.0028e-06	3.1023e-06	1.9878e-06	1.3999e-06	3.5291e-06	2.6017e-07	2.4219e-06	3.3818e-06	3.657e-06	2.771e-06	0
401.802	1.6328e-06	4.0194e-06	3.5617e-06	5.9901e-06	1.8001e-06	2.4168e-06	9.2881e-07	7.0572e-07	1.179e-06	3.9015e-07	2.8164e-06	1.3425e-06	9.4009e-07	1.6362e-06	0
402.801	4.1166e-06	2.1626e-06	1.8977e-06	4.0745e-06	3.0368e-06	2.0024e-07	1.0458e-06	2.8042e-06	3.0432e-06	1.7727e-06	5.9149e-06	7.5855e-07	2.6391e-06	9.0821e-07	0
403.801	2.7849e-06	2.0173e-06	3.0914e-06	3.0454e-06	2.0233e-06	2.4358e-06	1.7808e-06	2.3623e-06	3.589e-06	1.07e-07	2.365e-06	1.0321e-06	1.3737e-06	6.5115e-07	0
404.8	2.4593e-06	1.7215e-06	3.9338e-06	3.5945e-06	2.2643e-06	1.8313e-06	1.199e-06	1.1042e-06	1.3567e-06	2.2964e-06	5.3073e-06	2.6118e-06	2.0978e-06	4.1239e-06	0
405.8	3.3696e-06	2.6705e-07	2.5684e-06	1.2395e-06	4.3626e-07	1.5339e-06	3.2807e-06	8.9679e-07	4.8427e-07	2.087e-06	9.4959e-08	2.332e-06	3.6195e-06	1.243e-06	0
406.799	5.7808e-07	3.1878e-06	3.944e-06	2.4064e-06	2.1294e-06	9.5016e-07	7.4901e-07	1.0319e-06	2.4988e-06	1.7054e-06	2.3677e-06	1.7236e-06	1.4457e-06	1.1613e-06	0
407.799	4.7238e-06	3.2491e-06	2.9731e-06	2.4633e-06	5.0476e-06	3.2657e-07	7.6846e-07	1.9068e-06	3.8858e-06	4.6115e-06	1.5143e-06	1.3386e-06	4.2733e-06	5.7666e-07	0
408.798	1.6008e-06	3.1284e-06	2.9066e-06	3.4993e-06	2.3842e-06	6.497e-07	4.3501e-07	1.5902e-06	3.5258e-07	1.0039e-06	2.665e-06	3.4634e-06	4.1354e-06	1.8716e-06	0
409.798	1.3651e-06	1.3688e-06	4.1925e-06	2.4037e-06	2.2529e-06	6.4128e-07	5.5283e-07	2.8385e-07	1.5159e-06	1.2856e-06	1.2628e-06	1.2938e-06	2.5884e-06	3.6318e-07	0
410.797	1.6274e-06	3.6061e-06	4.337e-06	2.7983e-06	4.2862e-06	2.5172e-06	9.9978e-07	1.8553e-06	6.369e-07	1.8234e-06	1.0422e-06	1.9243e-06	3.2068e-06	2.9887e-06	0
411.797	9.2857e-07	2.8782e-06	2.591e-06	1.3897e-06	3.9614e-06	1.8235e-06	2.6267e-06	2.12e-06	2.2836e-06	3.3929e-06	3.9349e-06	5.391e-07	2.1516e-06	2.5054e-06	0
412.796	8.7932e-07	3.9758e-06	6.9278e-06	2.0834e-06	2.219e-06	1.5225e-06	4.7759e-06	1.3193e-06	6.6809e-07	1.9156e-06	3.3297e-06	5.9473e-07	1.2639e-06	2.0227e-06	0
413.796	5.8789e-06	1.5329e-06	3.8964e-06	1.6924e-06	1.29e-06	1.328e-06	3.1143e-06	1.7745e-06	1.6532e-06	9.165e-07	1.6706e-06	3.6799e-06	2.6205e-06	1.129e-06	0
414.795	1.979e-06	3.6702e-06	5.3748e-06	4.1439e-06	2.1338e-06	5.0512e-07	1.3212e-06	6.3133e-07	3.0303e-06	1.5394e-06	1.4954e-06	2.5261e-06	4.3411e-06	2.6679e-06	0
415.795	1.2051e-06	1.6974e-06	3.3787e-06	2.2875e-06	7.4507e-07	1.6618e-06	1.1761e-06	4.5345e-07	2.4282e-06	9.5735e-07	2.5999e-06	9.8458e-07	4.4949e-06	1.2358e-06	0
416.794	5.3222e-07	4.2029e-06	2.0285e-06	4.4578e-06	2.2772e-06	1.9542e-06	1.1736e-06	6.1219e-07	1.9008e-06	1.2644e-06	1.8343e-06	1.3087e-06	3.975e-06	1.7158e-06	0
417.794	2.0878e-06	5.197e-06	4.1694e-06	1.4938e-06	4.8448e-06	8.3862e-07	1.1109e-06	2.047e-06	2.3074e-06	2.3261e-06	1.7375e-06	2.7215e-06	2.4443e-06	2.744e-06	0
418.793	6.8518e-07	2.8619e-06	2.2698e-06	1.7574e-06	3.4037e-06	1.235e-06	1.8944e-06	1.5022e-06	7.3186e-07	2.7691e-06	2.9769e-06	1.4299e-06	2.8991e-06	1.1458e-06	0
419.793	7.9787e-07	2.4252e-06	3.5793e-06	2.4804e-06	2.1287e-06	1.3584e-06	3.8866e-06	4.2938e-06	2.2387e-06	2.3995e-06	1.97e-06	1.788e-06	4.1289e-06	1.4314e-06	0
420.792	4.2154e-06	4.8614e-06	2.5683e-06	2.5468e-06	3.1236e-06	1.1194e-06	1.717e-06	8.2355e-07	3.0544e-06	1.2111e-06	2.2718e-06	1.1318e-06	7.5271e-07	1.1342e-06	0
421.792	1.7404e-06	1.5237e-06	4.9014e-07	1.706e-06	5.7116e-06	1.5249e-06	2.7198e-06	2.1112e-06	1.8381e-06	1.3071e-06	2.4032e-06	4.206e-06	2.9897e-06	1.9475e-06	0
422.791	1.39e-06	2.1102e-06	8.6317e-07	2.9926e-06	2.0743e-06	1.1757e-06	9.0226e-07	1.2505e-06	2.2483e-06	2.0111e-06	2.7216e-06	6.8711e-07	3.2271e-06	2.1855e-06	0
423.791	2.0008e-06	4.1163e-06	3.7698e-06	1.2043e-06	1.5542e-06	1.5801e-06	1.2053e-06	4.2537e-06	1.9469e-06	6.4273e-07	2.4842e-06	2.2466e-06	3.4213e-06	2.3462e-06	0
424.79	3.5799e-06	2.7588e-06	1.8078e-06	2.1532e-06	5.3033e-06	1.6691e-06	2.3766e-06	3.7663e-06	9.5186e-07	1.3239e-06	1.3821e-06	2.7484e-06	4.1516e-06	2.1922e-06	0
425.79	2.4156e-06	1.8734e-06	2.6894e-06	1.1188e-06	4.7415e-06	1.1649e-06	2.3183e-06	5.0449e-07	2.5737e-06	1.0639e-06	3.8515e-06	1.8437e-06	1.7136e-06	7.8402e-07	0
426.789	2.2249e-06	1.9368e-06	3.0282e-06	2.0761e-06	2.1644e-06	1.5039e-06	4.5494e-07	2.1732e-06	2.7746e-06	1.0835e-06	1.5057e-06	3.086e-06	4.4428e-06	8.3897e-07	0
427.789	2.5112e-07	3.4302e-06	3.2924e-06	8.731e-07	6.8388e-07	7.5907e-07	1.691e-06	1.9458e-07	1.4331e-06	1.1324e-06	2.1125e-06	1.4569e-06	1.2599e-06	4.2884e-06	0
428.788	9.4686e-07	4.1131e-06	2.4944e-06	2.3422e-06	1.9613e-06	1.0456e-06	2.7942e-06	9.019e-07	2.1729e-06	2.2636e-06	9.338e-07	8.8341e-07	2.2713e-06	7.2396e-07	0
429.788	1.5346e-06	7.7975e-07	2.4496e-06	3.2394e-06	4.5566e-06	1.6761e-06	4.4513e-07	1.1407e-06	9.7253e-07	2.1049e-06	1.4416e-06	6.3891e-07	2.573e-06	1.3856e-06	0
430.787	1.5783e-06	8.7039e-07	2.582e-06	1.8322e-06	4.417e-06	1.5339e-06	1.5865e-06	1.4539e-06	1.1684e-06	1.3634e-06	9.987e-07	1.4061e-06	1.9163e-06	3.0376e-07	0
431.787	9.905e-07	8.2507e-07	1.6121e-06	3.9088e-06	3.9838e-06	2.2556e-06	2.0307e-06	2.6006e-06	9.2687e-07	3.7229e-06	2.0468e-06	1.3189e-06	3.4737e-06	1.8098e-06	0
432.786	1.6536e-06	3.6348e-06	3.3188e-06	7.5539e-07	2.8839e-06	2.5231e-06	1.7737e-06	1.1837e-06	7.771e-07	1.0918e-06	1.9973e-06	2.8132e-06	1.838e-06	3.6992e-06	0
433.786	5.1243e-06	2.4575e-06	5.8394e-06	4.8264e-06	1.007e-06	8.573e-07	1.0424e-06	8.6904e-07	1.9755e-06	9.8099e-07	2.0161e-06	2.8149e-06	1.6418e-06	1.6344e-06	0
434.785	2.2723e-06	3.2004e-06	4.4207e-06	2.701e-06	3.8569e-06	1.0153e-06	1.3467e-06	2.5449e-06	9.8965e-07	1.2088e-06	7.0326e-07	1.8039e-06	2.3058e-06	4.9754e-07	0
435.785	2.2014e-06	8.6447e-07	3.4423e-06	3.5729e-06	1.1548e-06	4.5342e-07	2.4306e-06	5.3599e-07	1.4039e-06	1.316e-06	1.6199e-06	2.2612e-06	2.1194e-06	2.2974e-06	0
436.784	3.1961e-06	2.1041e-06	1.6174e-06	1.4784e-06	3.2115e-06	1.6819e-06	9.5417e-07	2.3831e-06	9.5566e-07	2.9339e-06	3.052e-06	1.5047e-06	3.4928e-06	1.5152e-06	0
437.784	3.212e-06	7.7185e-07	3.496e-06	3.1246e-06	3.7753e-06	2.0049e-06	7.2301e-07	3.4723e-07	1.4776e-06	2.031e-06	6.2251e-07	5.765e-07	1.5673e-06	5.2627e-07	0
438.783	1.392e-06	3.4534e-06	4.6201e-06	1.654e-06	4.9454e-06	2.5046e-07	6.1079e-07	1.7489e-06	7.3541e-07	2.6142e-06	2.1064e-07	1.906e-06	1.8969e-06	4.0882e-07	0
439.783	2.3769e-06	2.7741e-06	3.9178e-06	1.4454e-06	2.7593e-06	8.2299e-07	2.8502e-06	2.098e-06	1.585e-06	1.3723e-06	1.0185e-06	1.4828e-06	1.9001e-06	2.1404e-06	0
440.782	3.6658e-06	2.2803e-06	3.2284e-06	1.3488e-06	1.6143e-06	2.0134e-06	2.3042e-06	8.1922e-07	2.4569e-06	5.2977e-07	3.8039e-06	3.302e-06	7.4082e-07	1.8703e-06	0
441.782	5.0007e-06	2.688e-06	4.4821e-06	3.3975e-06	2.3881e-06	5.5141e-07	2.1551e-06	1.0006e-06	1.6364e-06	8.1959e-07	2.0096e-06	1.9255e-06	1.2567e-06	5.3203e-07	0
442.781	3.2511e-06	3.441e-06	3.8383e-06	2.1415e-06	1.719e-06	8.2354e-07	1.5004e-06	2.5956e-06	1.5044e-06	1.1056e-06	1.8902e-06	2.2363e-06	2.2562e-06	3.4273e-07	0
443.781	1.3465e-07	7.8112e-07	9.411e-08	5.546e-07	4.276e-07	1.2122e-06	6.151e-07	2.7503e-06	6.2889e-07	1.7734e-06	1.1788e-06	2.5737e-06	4.6216e-06	2.1448e-06	0
444.78	7.6281e-07	4.0735e-07	1.8136e-06	2.2293e-06	3.4477e-06	1.955e-06	1.3609e-06	1.9853e-06	6.5601e-07	2.1498e-06	2.1667e-06	3.9055e-06	1.2461e-06	2.0538e-06	0
445.78	1.2768e-06	2.7145e-06	1.9391e-06	9.1707e-07	8.9829e-07	1.7575e-06	1.121e-06	1.246e-06	3.1353e-06	3.1025e-06	2.393e-06	1.4046e-06	2.4404e-06	1.5593e-06	0
446.779	2.9293e-06	1.0064e-06	7.6871e-07	3.3796e-06	3.0059e-06	1.2033e-06	2.4393e-06	1.8188e-06	1.6914e-06	1.7937e-06	1.4445e-06	1.1215e-06	2.2337e-07	3.2108e-07	0
447.779	5.4893e-07	1.1882e-06	2.6012e-06	1.6794e-06	2.1863e-06	1.6499e-06	7.0666e-07	6.1611e-07	1.5323e-06	3.042e-06	1.3276e-06	1.4697e-06	1.2857e-06	1.2506e-06	0
448.778	1.3026e-06	3.2295e-06	1.0167e-06	1.1922e-06	3.5067e-06	1.882e-06	1.1056e-06	1.9551e-06	1.2671e-06	2.1101e-06	2.589e-06	7.0052e-07	1.933e-06	8.1004e-07	0
449.778	1.9192e-06	1.8287e-06	4.7408e-07	3.1849e-06	4.6229e-06	7.0891e-07	1.6379e-06	1.824e-06	2.687e-06	1.5945e-06	2.0494e-06	3.3727e-06	2.9115e-06	5.6972e-07	0
450.777	2.0261e-06	1.2076e-06	7.0005e-07	2.3094e-06	3.0107e-06	1.8871e-06	8.7336e-07	1.5786e-06	2.6296e-07	7.5828e-07	2.4523e-06	2.4514e-06	1.7206e-06	1.674e-06	0
451.777	1.7865e-06	1.5243e-06	5.4223e-06	5.2681e-07	8.5642e-07	8.1068e-07	1.7261e-06	6.1626e-07	6.0386e-07	9.7175e-07	1.417e-06	3.7112e-06	2.0155e-06	1.4468e-06	0
452.776	1.1895e-06	8.8656e-07	1.917e-06	2.6404e-06	1.0411e-06	1.6178e-06	2.6249e-06	1.6634e-06	2.2194e-06	2.6832e-06	7.9508e-07	9.6025e-07	3.2507e-06	1.1911e-06	0
453.776	2.5441e-06	2.4599e-06	1.8057e-06	1.3477e-06	1.8593e-06	2.9754e-06	3.0561e-06	9.2211e-07	2.0304e-06	2.9164e-06	3.487e-06	1.2661e-06	1.5905e-06	8.5502e-07	0
454.775	1.4177e-06	5.0624e-07	4.2678e-06	1.3843e-06	3.2353e-06	1.5075e-06	2.4412e-06	1.1401e-06	2.2953e-06	1.0499e-06	1.5156e-06	1.4365e-06	3.3207e-06	1.2357e-06	0
455.775	2.788e-06	3.3309e-06	2.6508e-06	4.0664e-06	1.7191e-06	9.8591e-07	4.1962e-06	8.5904e-07	1.9875e-06	2.3311e-06	1.9133e-06	1.5209e-06	3.8587e-06	1.7996e-07	0
456.774	2.2302e-06	2.4614e-06	1.6827e-06	3.0307e-06	3.0381e-06	1.9331e-06	2.8878e-06	2.3914e-06	2.1094e-06	1.9379e-06	1.7605e-06	2.3164e-06	7.7555e-07	1.1763e-06	0
457.774	2.7702e-06	2.0393e-06	5.2836e-07	2.8977e-06	1.2298e-06	2.0946e-07	8.6303e-07	8.0627e-07	7.8508e-07	3.2153e-06	2.6923e-07	2.3027e-06	3.6957e-06	1.329e-06	0
458.773	2.228e-06	1.8717e-06	1.4456e-06	2.5296e-06	1.5467e-06	2.5495e-06	2.7639e-06	1.8638e-06	3.31e-06	1.2671e-06	1.1833e-06	1.0511e-06	1.5424e-06	6.6837e-07	0
459.773	3.8047e-06	8.5465e-07	4.9544e-07	3.7847e-06	2.7187e-06	8.9511e-07	3.2806e-07	1.2926e-06	1.6135e-06	1.2235e-06	1.1461e-06	2.1206e-06	1.0839e-06	2.3405e-06	0
460.772	3.132e-06	1.6958e-06	2.3533e-06	1.6031e-06	4.0428e-06	9.628e-07	2.4593e-06	2.8899e-06	8.0947e-07	8.6568e-07	9.1259e-07	8.5965e-07	2.6302e-06	1.6156e-06	0
461.772	2.2883e-06	1.8894e-07	5.0535e-06	4.0096e-06	2.3855e-06	2.1014e-06	1.658e-06	6.0667e-07	1.9586e-06	2.0692e-06	7.3333e-07	1.8367e-06	3.1229e-06	1.4149e-06	0
462.771	2.3229e-06	2.3127e-06	1.4895e-06	2.5522e-06	7.4558e-07	1.5157e-06	4.5414e-07	5.7193e-07	1.1113e-06	8.4221e-07	3.2795e-06	1.4408e-06	3.4182e-06	1.1187e-06	0
463.771	1.9088e-06	1.385e-06	3.4895e-06	3.1997e-06	3.3681e-06	1.923e-06	8.7217e-07	8.5405e-07	5.0863e-07	7.3009e-07	2.0205e-06	9.8654e-07	2.7131e-06	1.1553e-06	0
464.77	1.7302e-06	2.0952e-06	1.284e-06	2.7413e-06	3.9061e-06	7.2432e-07	1.7507e-06	1.4606e-06	2.0122e-06	1.8744e-06	2.2531e-06	1.7649e-06	2.8752e-06	1.3707e-06	0
465.77	3.4188e-07	2.8119e-06	2.4144e-07	2.8512e-06	1.4778e-06	1.2454e-06	1.0342e-06	1.037e-06	5.9084e-07	1.1756e-06	2.444e-06	9.0526e-07	2.3263e-06	1.2584e-06	0
466.769	8.1166e-07	3.5387e-06	1.3864e-06	3.5017e-06	1.2483e-06	1.2651e-06	1.8378e-06	8.4209e-07	1.8486e-06	1.1504e-06	3.5247e-06	1.373e-06	3.0409e-06	2.0072e-06	0
467.769	3.6109e-06	7.7242e-07	2.0148e-06	4.4112e-07	1.9583e-06	1.0844e-06	3.1068e-07	1.1826e-06	8.4102e-07	1.1984e-06	1.1732e-06	1.5511e-06	2.4678e-06	2.5071e-06	0
468.768	1.31e-06	2.5921e-06	4.2297e-06	3.5558e-06	1.7682e-06	3.6895e-07	1.7104e-06	1.9048e-06	3.3954e-06	2.173e-06	3.0826e-06	2.1428e-06	6.5368e-07	2.5161e-06	0
469.768	1.3409e-06	1.709e-06	2.2166e-06	6.0899e-07	4.5799e-07	9.6686e-07	7.7902e-07	1.0541e-06	9.2161e-07	9.0698e-07	2.0176e-06	1.2826e-06	2.9618e-06	1.4261e-06	0
470.767	2.2939e-06	4.8453e-06	2.9231e-06	1.5453e-06	2.8414e-06	5.8687e-07	1.2147e-06	4.1582e-07	3.4018e-06	2.3844e-07	1.3588e-06	1.4856e-06	1.4516e-06	1.2054e-06	0
471.767	2.6564e-07	1.5451e-06	3.6141e-06	3.1512e-06	2.2643e-06	1.6218e-06	8.5509e-07	1.147e-06	1.028e-06	2.1461e-06	7.532e-07	4.5353e-07	1.6496e-06	1.5439e-06	0
472.766	2.2385e-06	5.5189e-07	2.1177e-06	5.3207e-07	3.6558e-06	1.0751e-06	2.0578e-06	5.2828e-07	1.6596e-06	1.9775e-06	1.2137e-06	2.2617e-06	2.2129e-06	2.2728e-06	0
473.766	1.2715e-06	6.113e-07	3.4553e-06	3.2219e-06	1.3958e-06	1.2237e-06	1.8621e-06	6.617e-07	1.7568e-06	7.9522e-07	3.0098e-06	2.4899e-06	2.9374e-06	5.3454e-07	0
474.765	1.8906e-06	4.1095e-07	1.7473e-06	2.9855e-06	3.0437e-06	2.9054e-06	3.1704e-06	1.0757e-06	1.1929e-06	1.4177e-06	5.75e-06	2.785e-06	2.8797e-06	1.5462e-06	0
475.765	8.9561e-07	2.0376e-06	1.8678e-06	1.0302e-06	7.1162e-07	7.0067e-07	5.6121e-07	1.5395e-06	1.7417e-06	1.8808e-06	1.8217e-06	1.9468e-06	1.5294e-06	1.1296e-06	0
476.764	2.0487e-06	2.5411e-06	3.5931e-06	2.9976e-06	3.8079e-06	1.9771e-06	3.2613e-06	1.1909e-06	1.4393e-06	1.7383e-06	1.6579e-06	1.3733e-06	2.0519e-06	1.0298e-06	0
477.764	2.0111e-06	2.1303e-06	1.6803e-06	3.1396e-06	2.3816e-06	6.7988e-07	2.0591e-06	9.3478e-07	1.2289e-06	9.1822e-07	6.0767e-07	1.9254e-06	2.8381e-06	3.104e-07	0
478.763	5.0248e-07	2.8696e-06	3.1424e-06	2.4066e-06	4.096e-06	1.6692e-06	1.31e-07	1.371e-06	2.181e-06	8.1505e-07	9.3172e-07	1.6477e-06	2.3503e-06	2.0062e-07	0
479.763	2.5648e-06	4.3557e-06	2.6794e-06	7.4049e-07	2.4096e-06	1.3983e-06	1.6904e-06	2.6792e-06	1.9417e-06	1.7124e-06	2.4297e-07	1.3142e-06	2.8114e-06	6.333e-07	0
480.762	1.7978e-06	1.7648e-06	2.6546e-06	2.8825e-06	3.0038e-06	2.2697e-06	1.2797e-06	1.072e-06	2.6759e-06	1.3942e-06	5.8076e-07	2.617e-06	2.5193e-06	2.0514e-06	0
481.762	1.4061e-06	2.5141e-06	2.6526e-06	2.4011e-06	9.3283e-07	1.9769e-06	1.5546e-06	6.9048e-07	2.7768e-06	7.1153e-07	1.1625e-06	1.9595e-06	1.6358e-06	1.3838e-06	0
482.762	6.1016e-07	1.9836e-07	1.745e-06	2.374e-06	2.4915e-06	5.2718e-07	2.248e-06	2.2593e-06	2.3902e-06	1.9184e-06	1.5586e-06	2.2765e-07	3.1756e-06	1.0372e-06	0
483.761	1.5785e-06	3.4172e-06	2.1413e-06	3.6699e-06	1.3208e-06	6.0865e-07	1.1706e-06	9.0916e-07	1.2968e-06	2.1363e-06	3.8154e-07	9.8343e-07	2.3004e-06	1.7413e-06	0
484.761	1.856e-06	2.3922e-06	2.3593e-06	2.3357e-06	2.5724e-06	5.9383e-07	2.2521e-06	1.9289e-06	2.5289e-06	2.8078e-06	1.9064e-06	3.3757e-06	2.2987e-06	7.4631e-07	0
485.76	7.2533e-07	2.6365e-06	3.2406e-06	1.3372e-06	4.2052e-06	1.3705e-06	2.5688e-06	1.6479e-06	1.7544e-06	2.0931e-06	8.6305e-07	2.4278e-06	2.878e-06	2.3855e-06	0
486.76	1.2746e-06	2.1704e-06	3.9039e-06	1.5747e-06	2.0967e-06	2.6685e-06	1.2435e-06	2.0385e-06	1.1532e-06	1.2695e-06	3.4078e-06	1.8576e-06	1.7447e-06	6.5387e-07	0
487.759	3.2271e-06	8.9464e-07	3.1726e-06	3.1479e-06	3.3361e-06	1.2655e-06	4.0853e-06	2.6746e-06	2.3257e-06	1.2093e-06	1.8465e-06	1.4655e-06	3.8491e-06	1.4209e-06	0
488.759	1.4138e-06	2.2547e-06	3.0934e-06	1.1659e-06	4.2394e-06	1.8786e-06	1.023e-06	8.0016e-07	2.3973e-06	1.9644e-06	2.0321e-06	5.0142e-07	7.7782e-07	2.0687e-06	0
489.758	1.4282e-06	9.4714e-07	2.5386e-06	2.342e-06	3.0289e-06	5.7351e-07	5.8523e-07	9.0717e-07	7.0786e-07	1.6169e-06	2.1633e-06	3.9167e-06	7.2799e-07	7.3148e-07	0
490.758	1.3206e-06	6.3671e-07	2.7744e-06	6.0071e-07	4.4006e-06	2.0768e-06	2.3323e-06	1.5051e-06	3.3064e-06	4.1951e-07	6.9725e-07	2.7175e-06	2.364e-06	1.4069e-06	0
491.757	2.7072e-06	2.0508e-06	3.6241e-06	2.0476e-06	4.1026e-06	2.1627e-06	2.1489e-06	3.069e-07	3.2892e-06	1.3579e-06	1.7697e-06	1.2744e-06	5.7055e-07	2.4835e-06	0
492.757	1.2314e-06	1.273e-06	5.7952e-07	2.5684e-06	2.5683e-06	1.5052e-06	1.4034e-06	8.0804e-07	2.641e-06	2.1211e-06	1.8075e-06	1.1219e-06	2.568e-06	9.7837e-07	0
493.756	3.9403e-06	1.7965e-06	1.3752e-06	3.2081e-06	1.2016e-06	2.5018e-07	1.0295e-06	1.5441e-06	4.8751e-07	2.4435e-06	7.7635e-07	3.5111e-06	2.6127e-06	1.0857e-06	0
494.756	2.4684e-06	1.7382e-06	9.3929e-07	1.6156e-06	4.096e-06	9.813e-07	4.0847e-07	2.0502e-07	1.0685e-06	6.0069e-07	1.632e-06	2.3001e-06	2.7642e-06	8.7902e-07	0
495.755	9.5709e-07	1.5242e-06	3.3517e-06	8.8e-07	2.7674e-06	1.4379e-06	1.7743e-06	1.5438e-06	2.1548e-06	2.5507e-06	2.8515e-07	1.5694e-06	2.2006e-06	1.7251e-06	0
496.755	2.2619e-06	1.6953e-06	4.9781e-06	1.8767e-06	2.7213e-06	3.9654e-07	1.2996e-06	2.2161e-06	7.5112e-07	1.9519e-06	1.732e-06	2.143e-06	4.4468e-07	1.5183e-06	0
497.754	1.1193e-06	2.3625e-06	3.7178e-06	1.3875e-06	6.6485e-07	9.2931e-07	1.7184e-07	2.3283e-06	1.6138e-06	2.6906e-06	3.8422e-06	1.8334e-06	2.632e-06	2.0077e-07	0
[truncated: 1,581 more rows]

## Sheet: M48_phase
response freq\stimulus size	FF	70	60	50	40	30	20	10	AN10	AN20	AN30	AN40	AN50	AN60
[truncated: 2,080 more rows]

[truncated: 17 more sheets: L36_amp, L36_phase, M36_amp, M36_phase, L30_amp, L30_phase, M30_amp, M30_phase, L12_amp, L12_phase, M12_amp, M12_phase, L8_amp, L8_phase, M8_amp, M8_phase, L-M ratio]
